# Supplementary material for: On the model uncertainties in Bayesian source reconstruction using an ensemble of weather predictions, the emission inverse modelling system FREAR v1.0, and the Lagrangian transport and dispersion model Flexpart v9.0.2
Source: Copernicus journal article supplement (doi:10.5194/gmd-14-1237-2021), 2021-03-08
Supplement: Supplementary file 1 [file gmd-14-1237-2021-supplement.pdf]

Supplement of Geosci. Model Dev., 14, 1237–1252, 2021  
<https://doi.org/10.5194/gmd-14-1237-2021-supplement>  
© Author(s) 2021. This work is distributed under  
the Creative Commons Attribution 4.0 License.

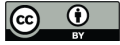

*Supplement of*

**On the model uncertainties in Bayesian source reconstruction using an ensemble of weather predictions, the emission inverse modelling system FREAR v1.0, and the Lagrangian transport and dispersion model Flexpart v9.0.2**

**Pieter De Meutter et al.**

*Correspondence to:* Pieter De Meutter ([pieter.de.meutter@sckcen.be](mailto:pieter.de.meutter@sckcen.be))

The copyright of individual parts of the supplement might differ from the CC BY 4.0 License.

itime=10, iobs=10

density

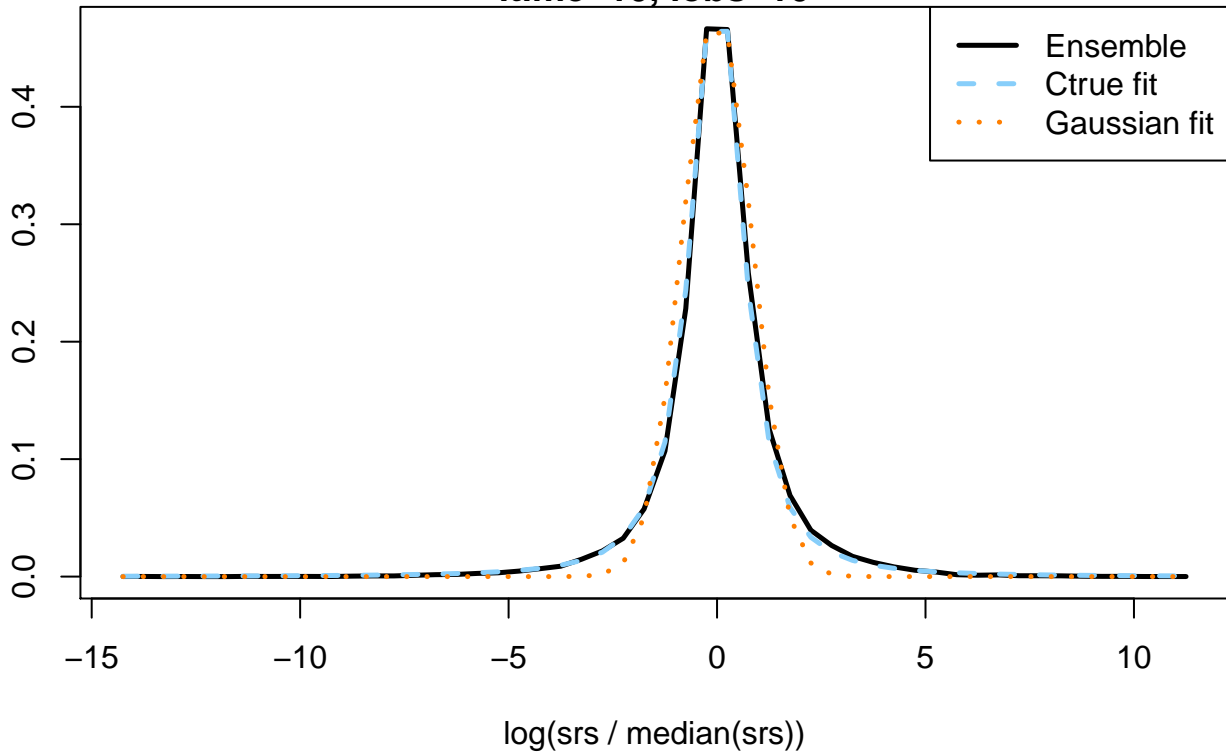

— Ensemble  
- - Ctrue fit  
... Gaussian fit

itime=10, iobs=11

density

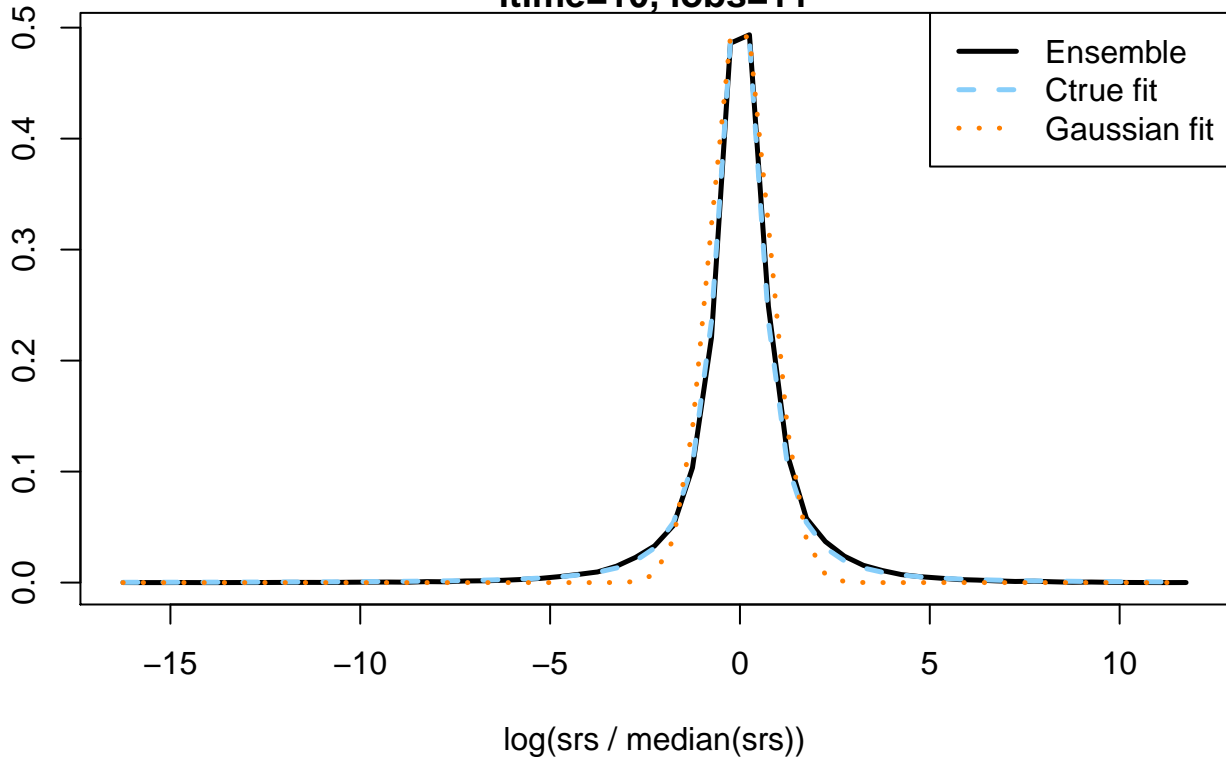

itime=10, iobs=12

density

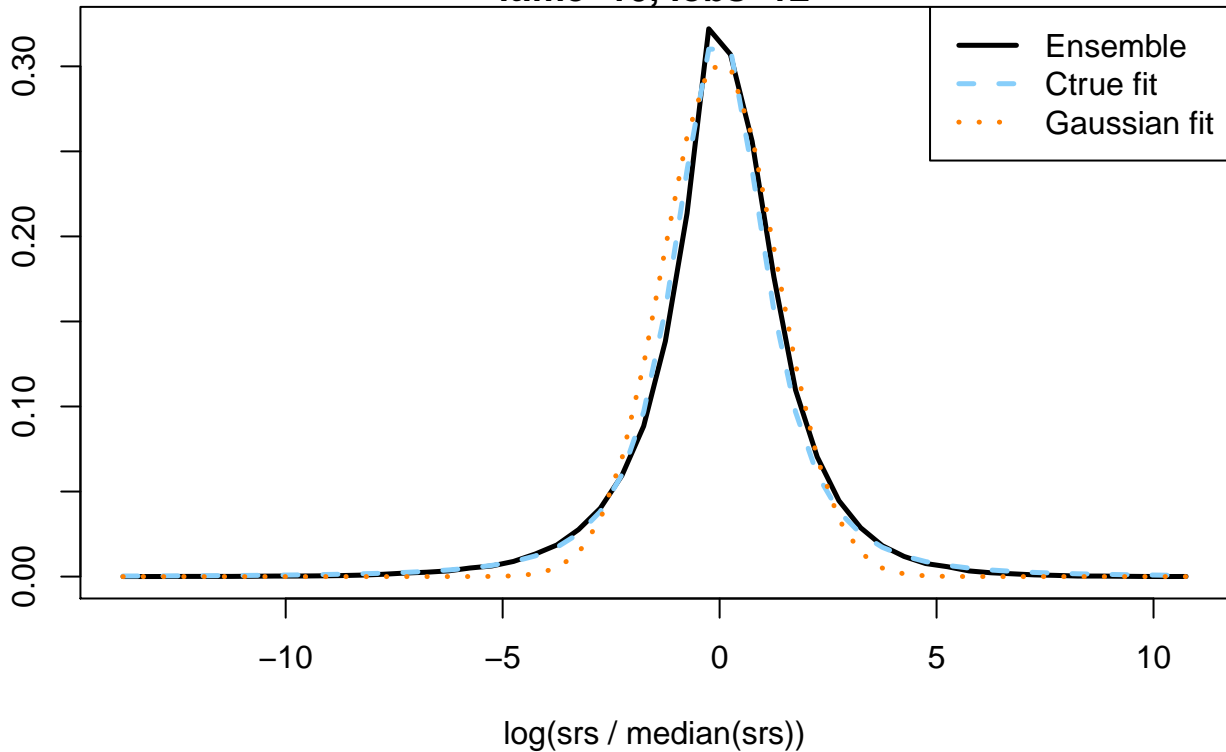

itime=10, iobs=1

density

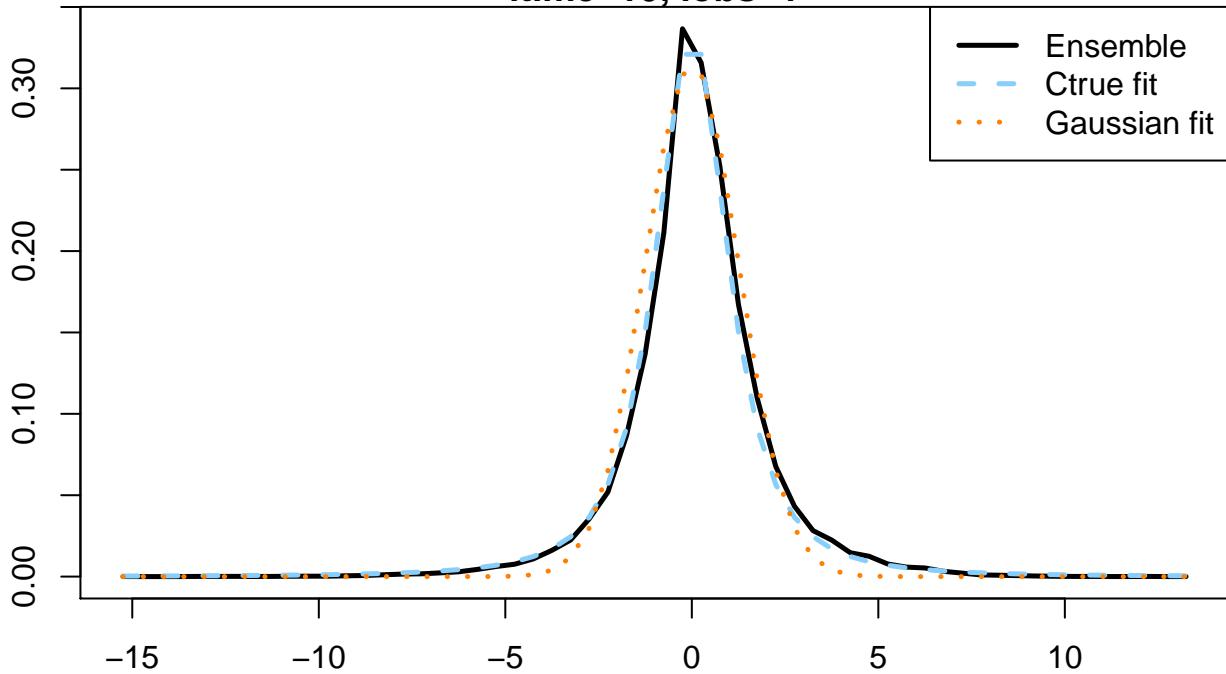

log(srs / median(srs))

itime=10, iobs=2

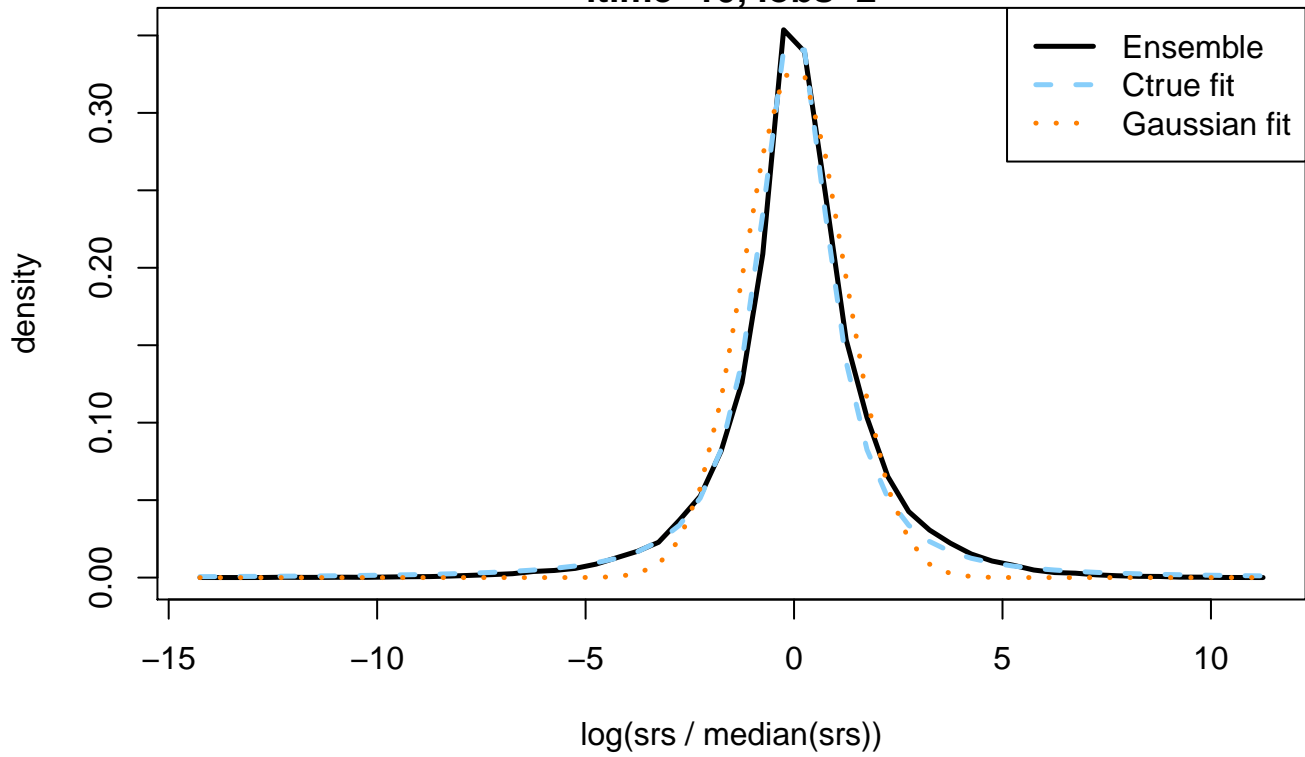

itime=10, iobs=3

density

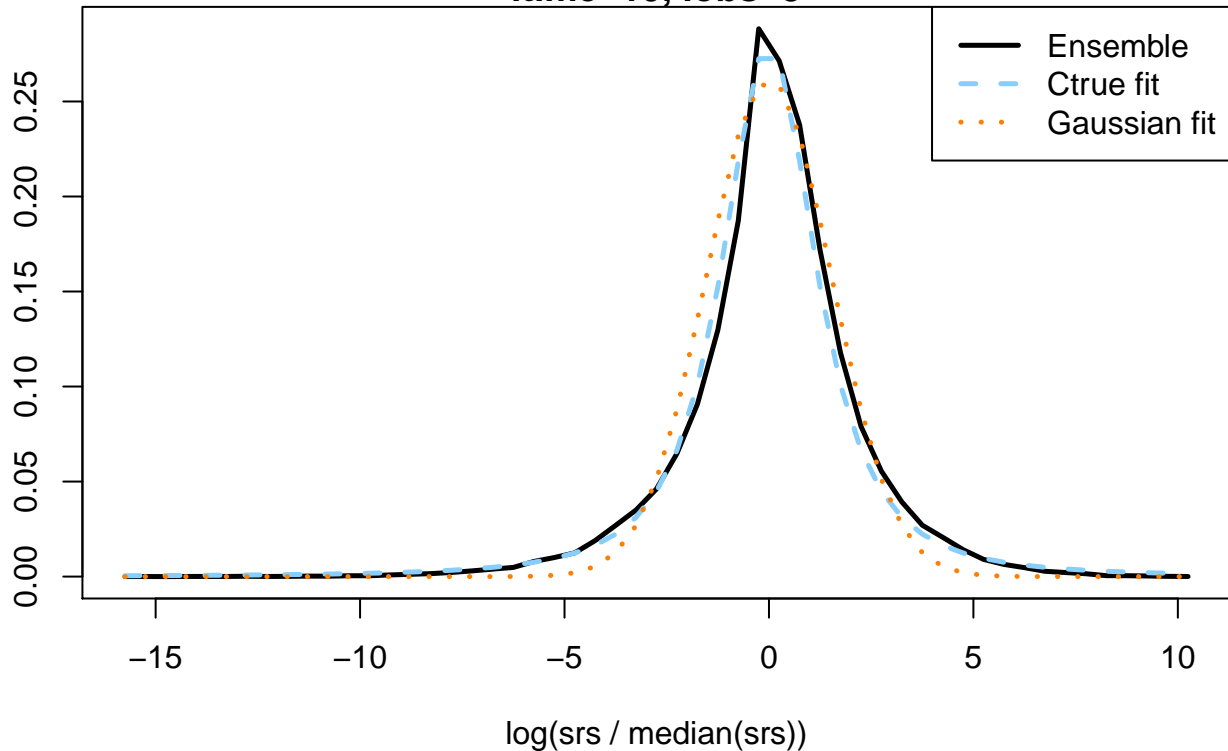

itime=10, iobs=4

density

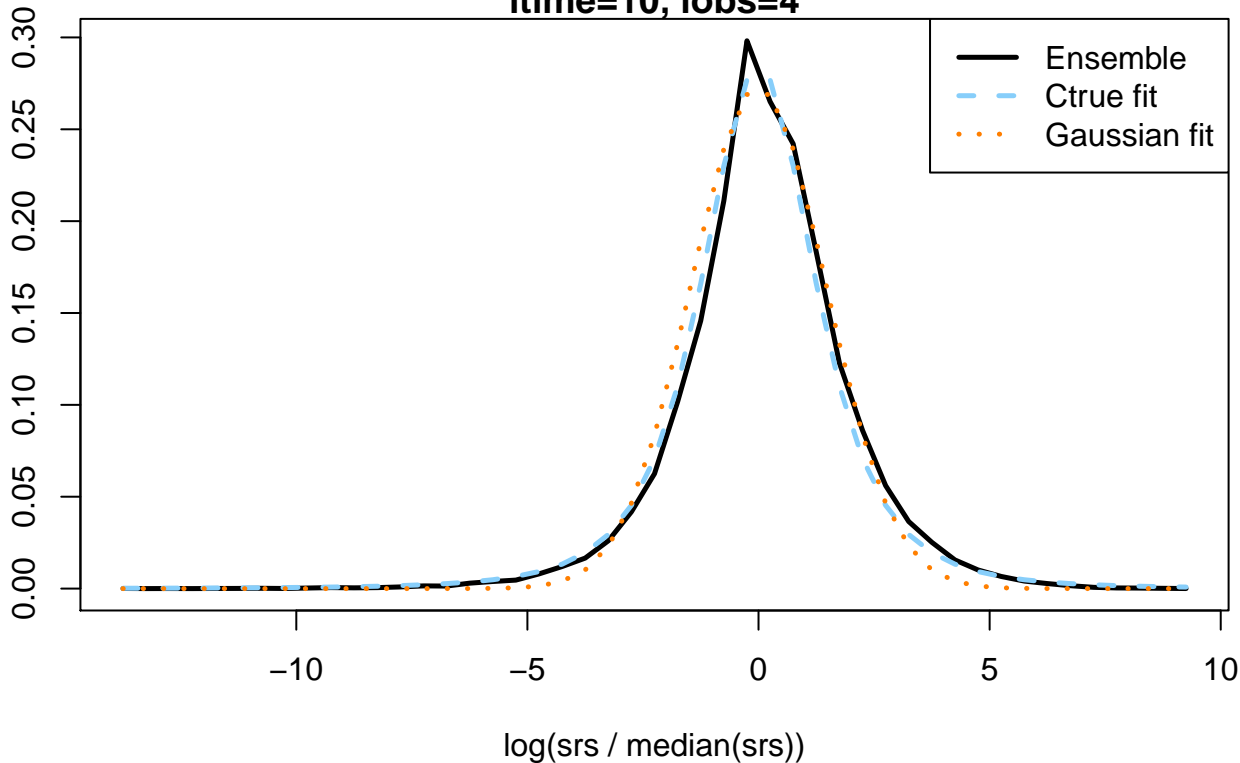



itime=10, iobs=5

density

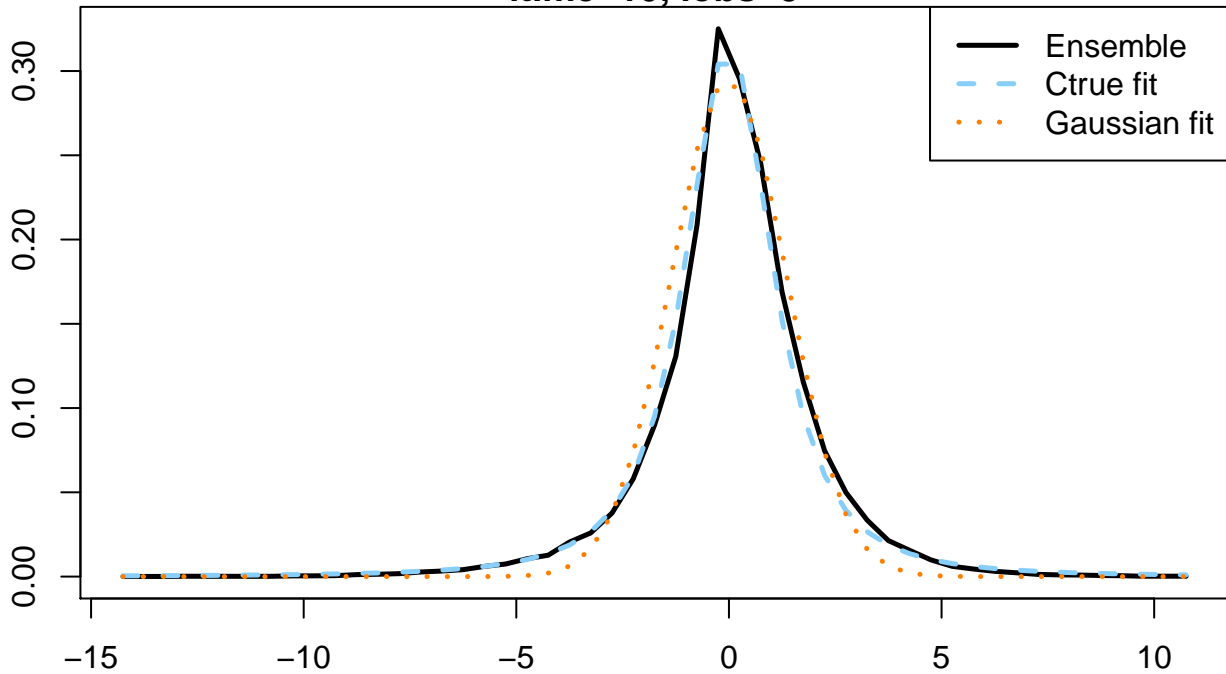

log(srs / median(srs))

itime=10, iobs=6

density

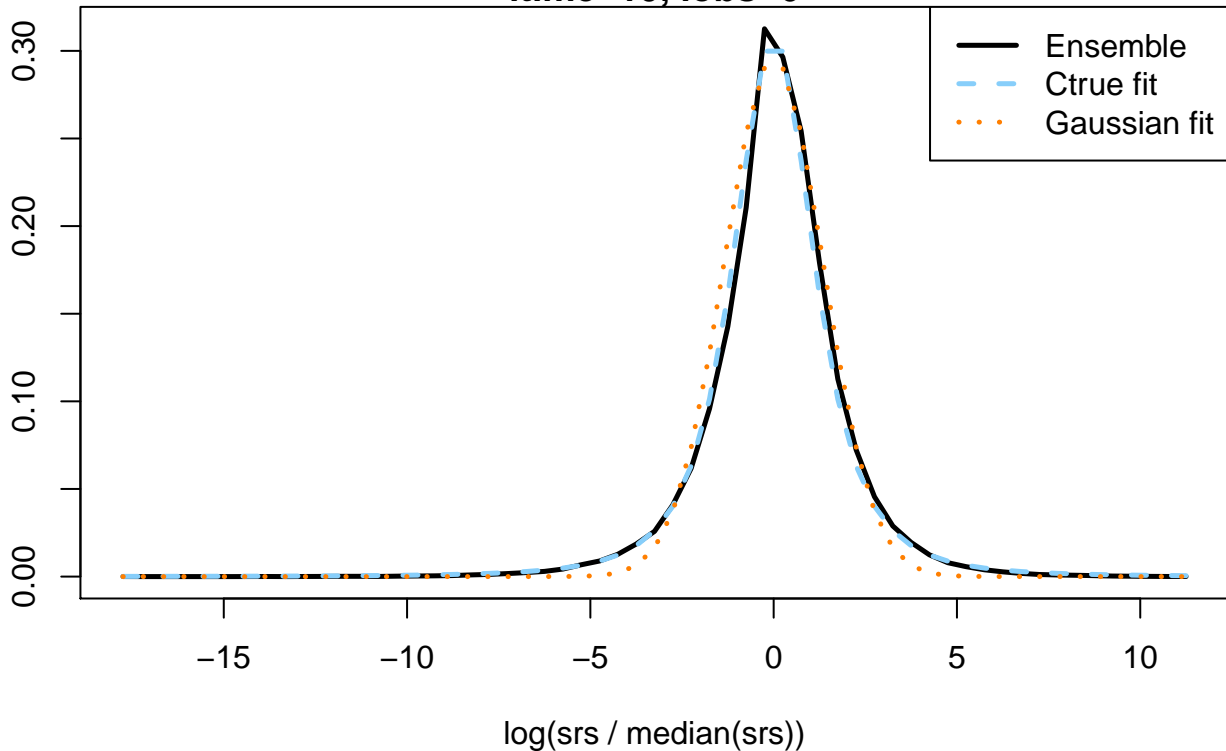

itime=10, iobs=7

density

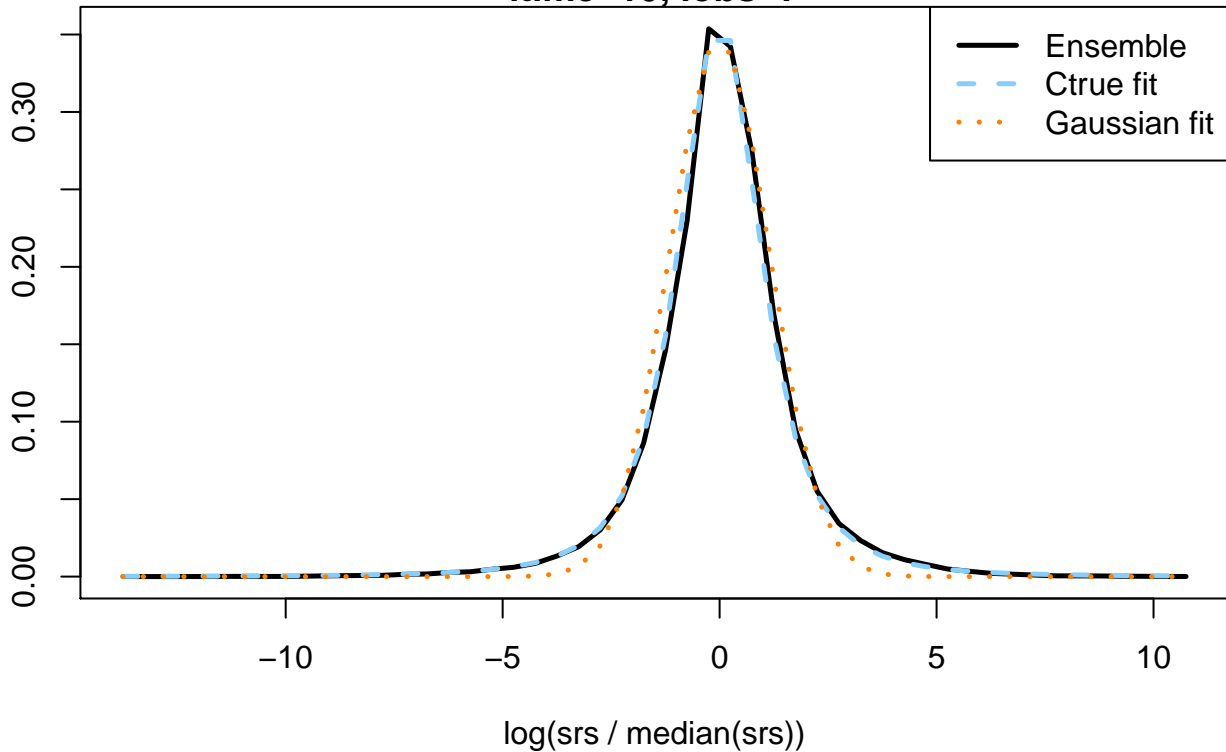

— Ensemble  
- - Ctrue fit  
... Gaussian fit

itime=10, iobs=8

density

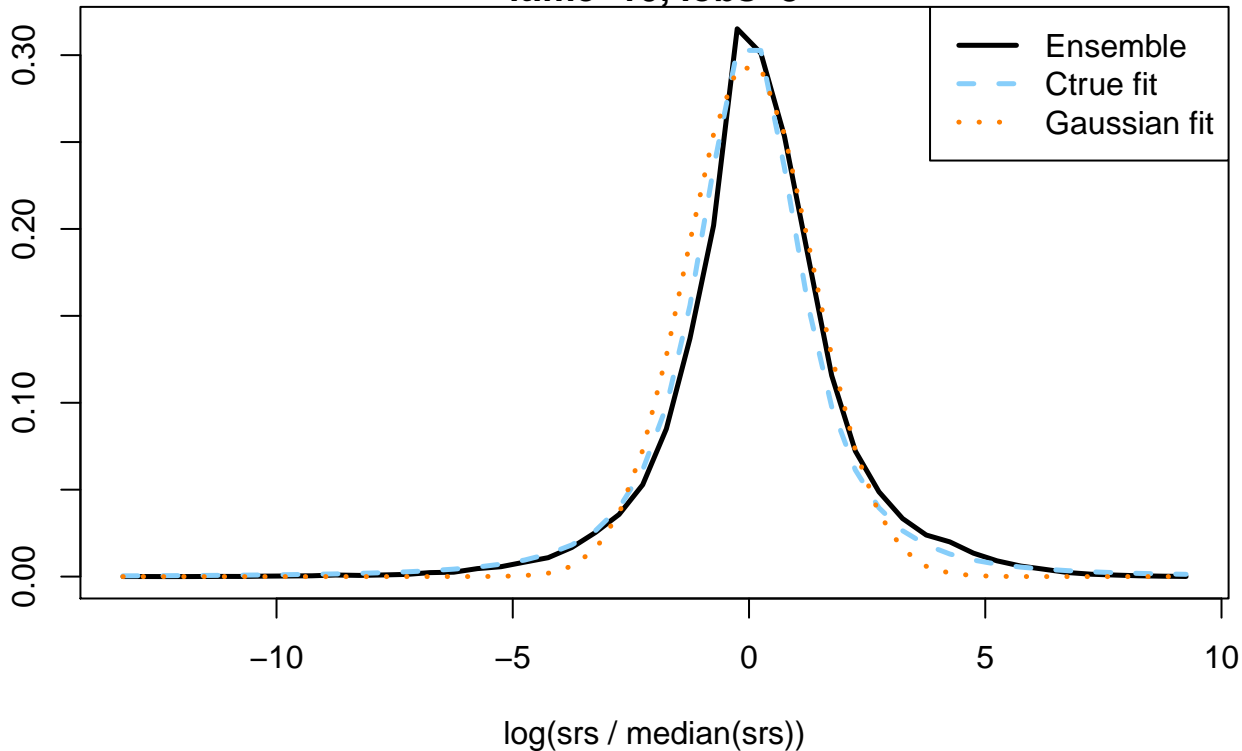

itime=10, iobs=9

density

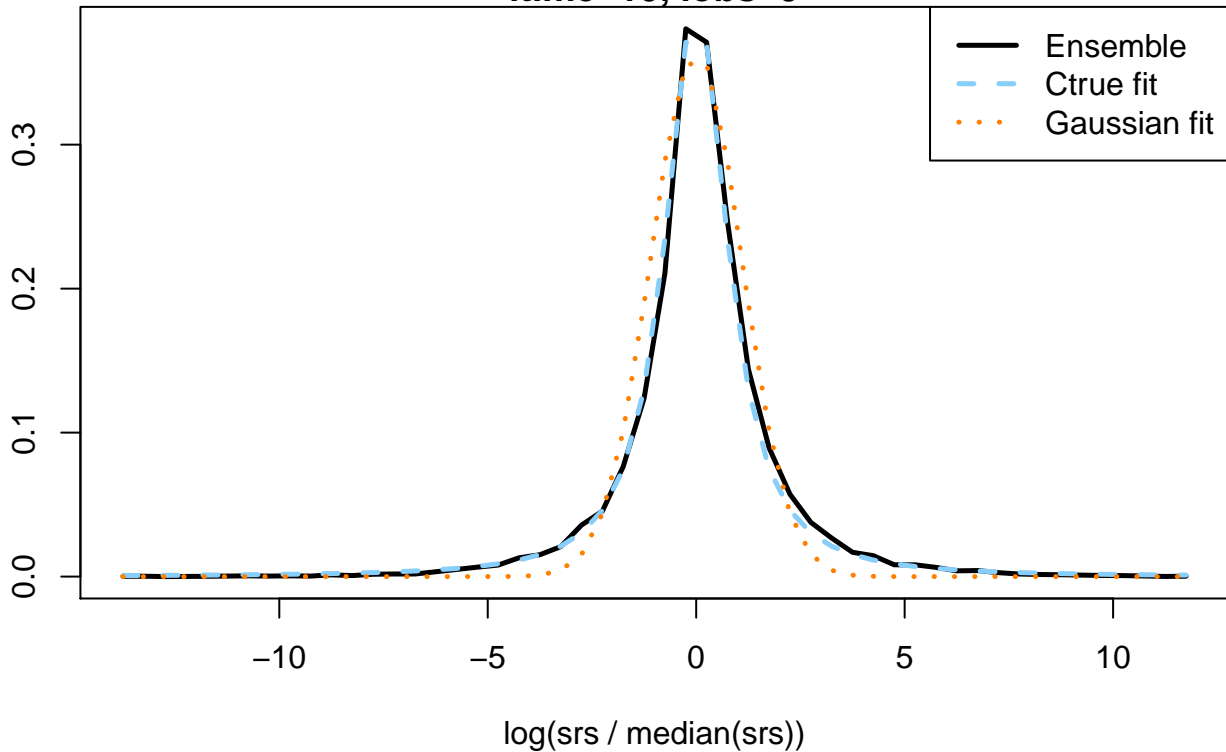

itime=11, iobs=10

density

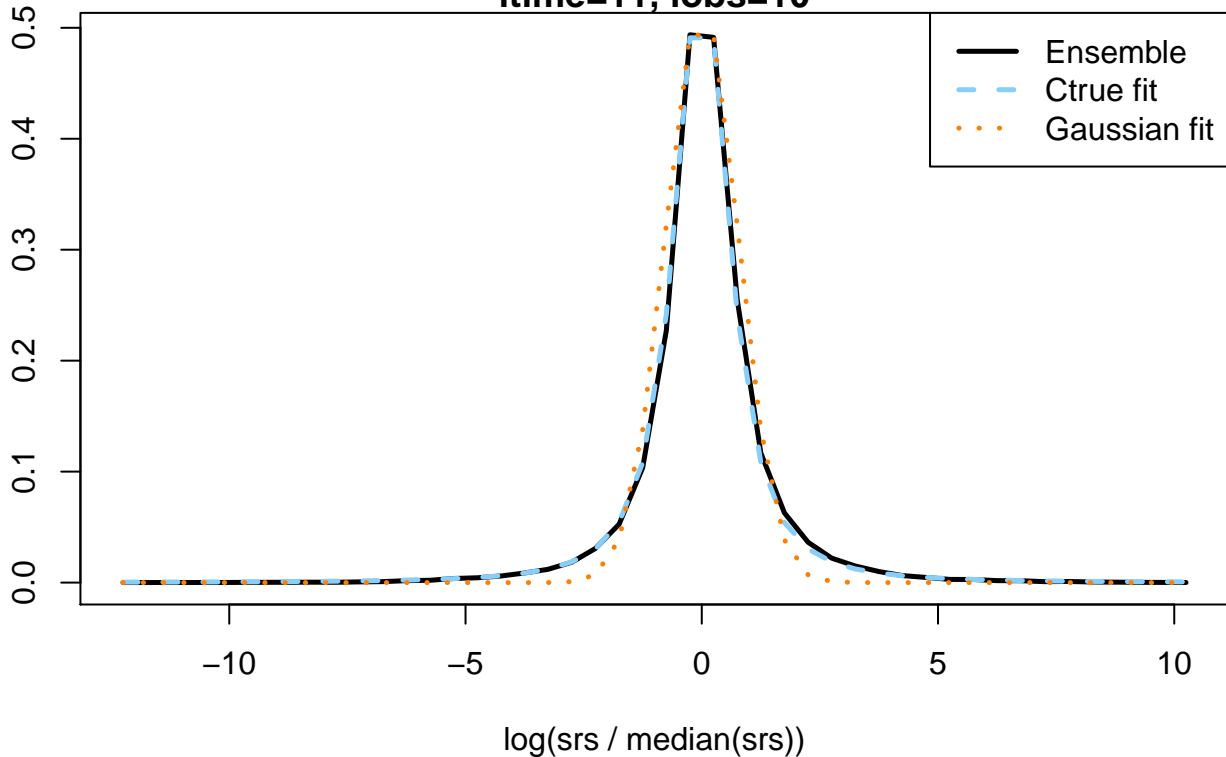

itime=11, iobs=11

density

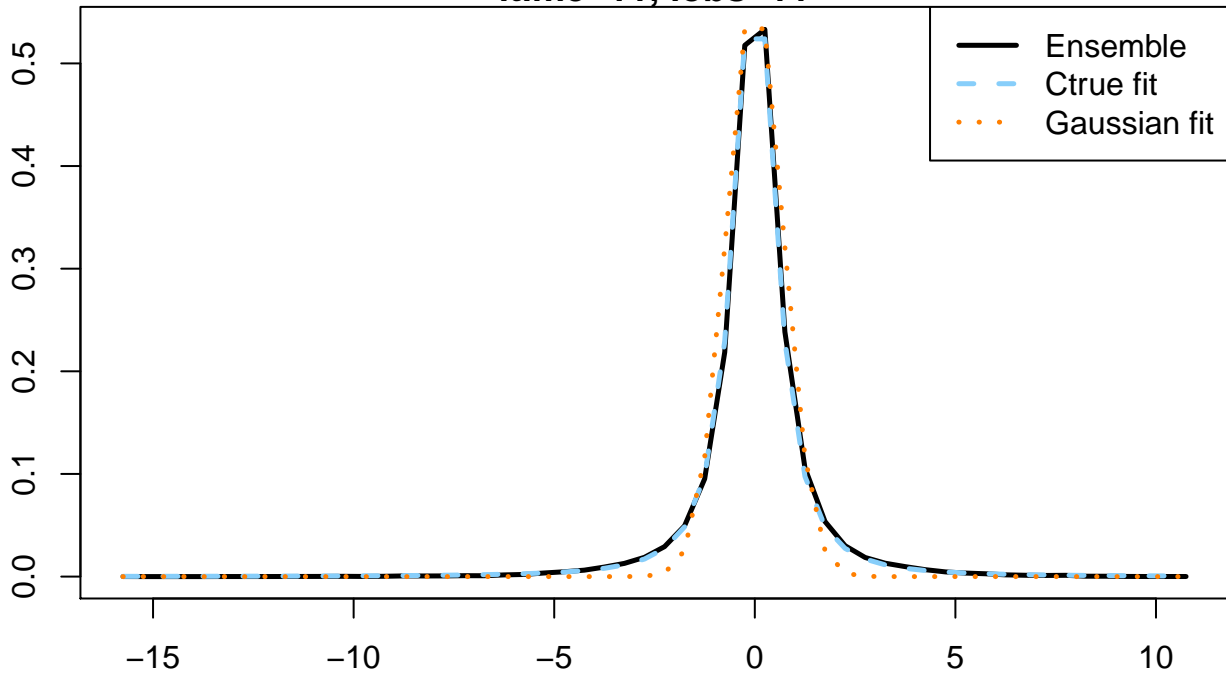

$\log(\text{srs} / \text{median}(\text{srs}))$

itime=11, iobs=12

density

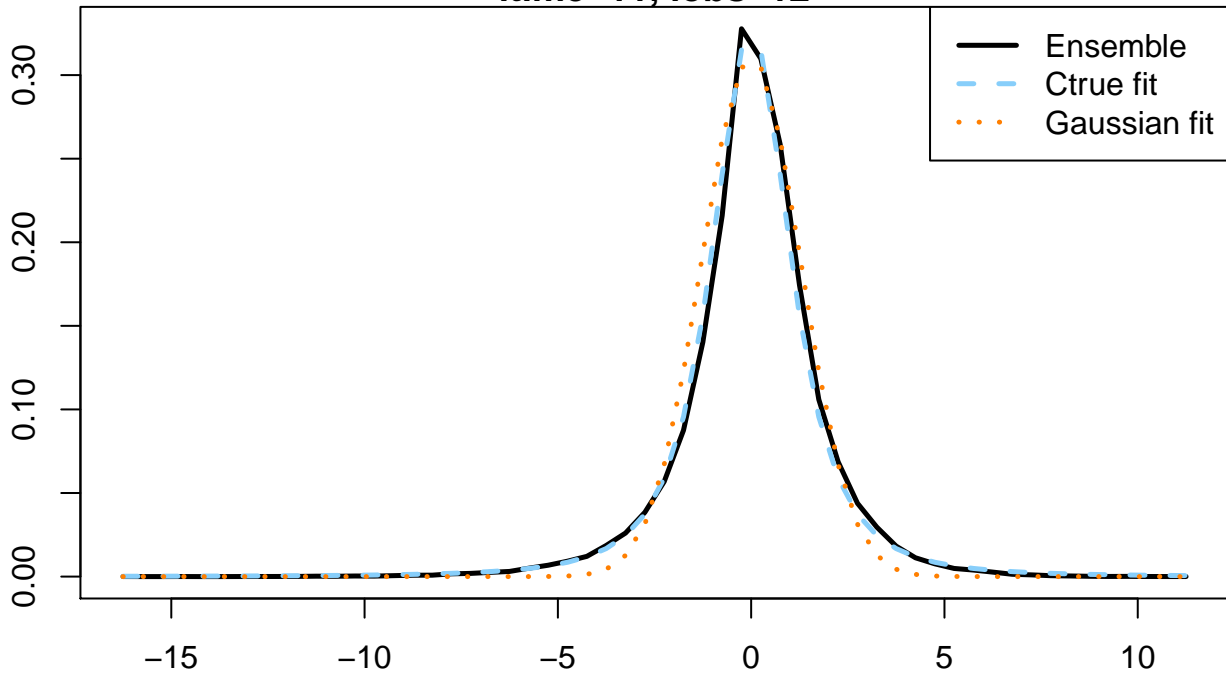

— Ensemble  
- - Ctrue fit  
... Gaussian fit

$\log(\text{srs} / \text{median}(\text{srs}))$



itime=11, iobs=1

density

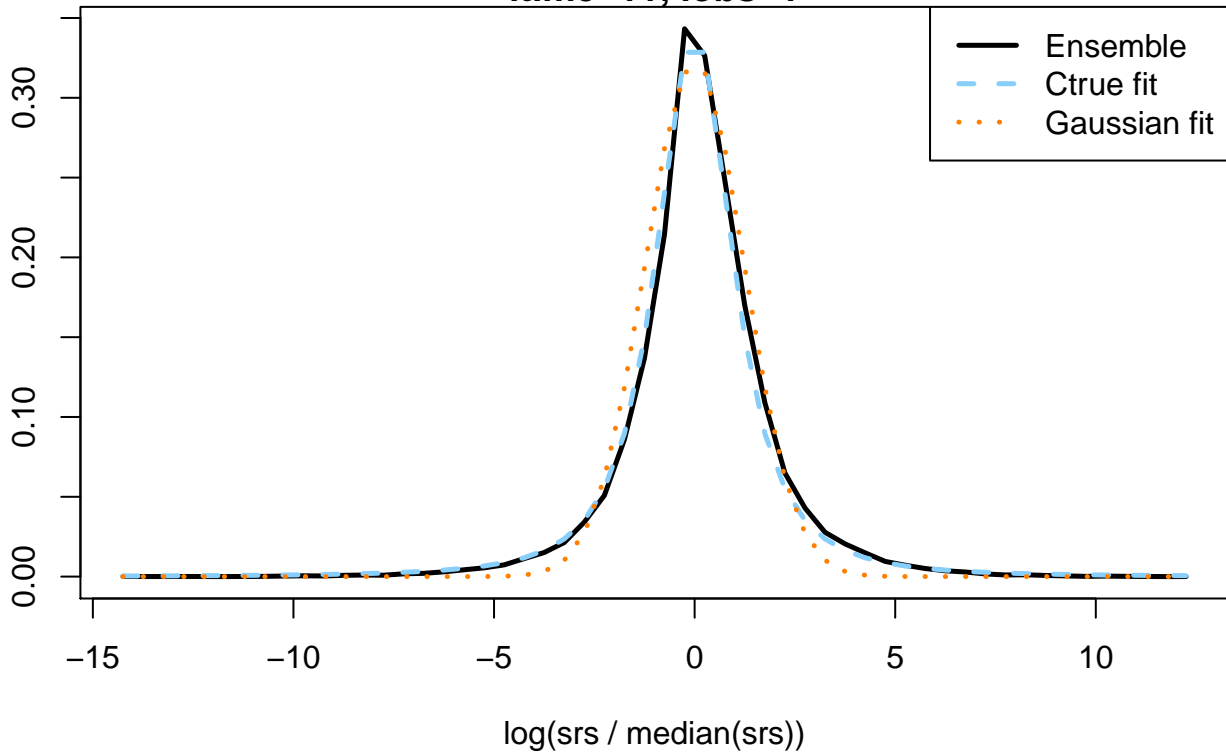

— Ensemble  
- - Ctrue fit  
... Gaussian fit

itime=11, iobs=2

density

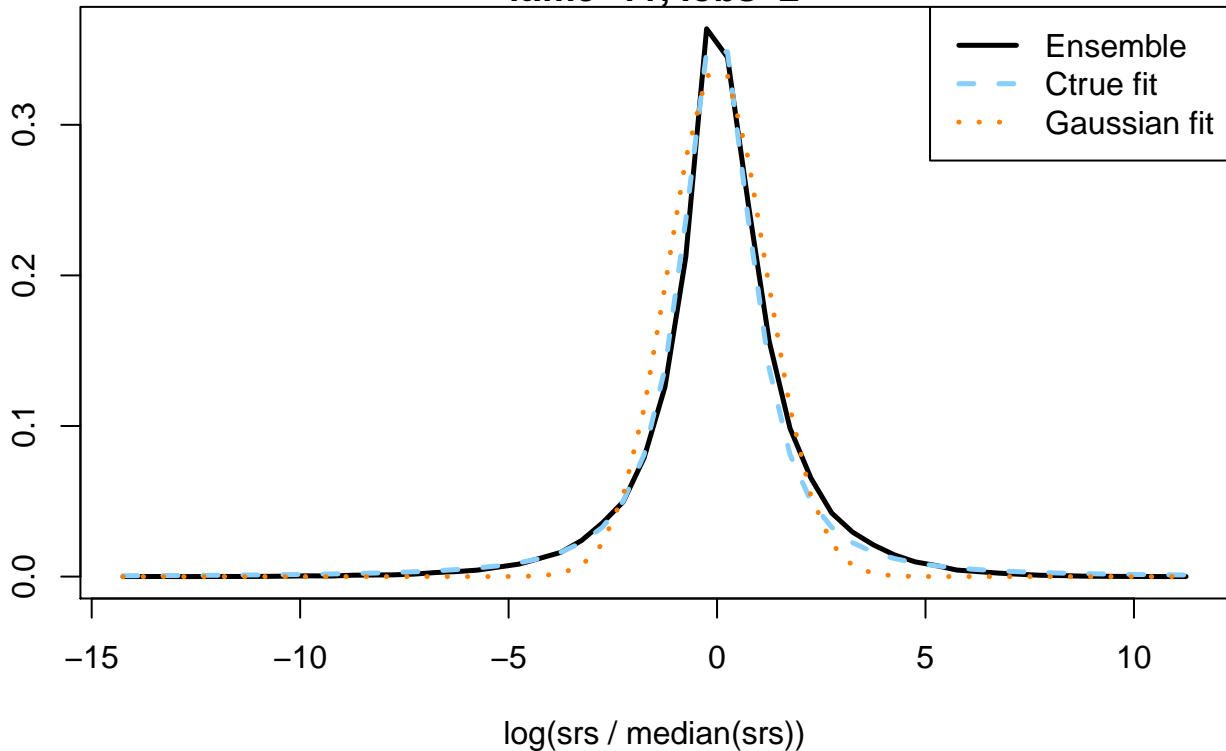

itime=11, iobs=3

density

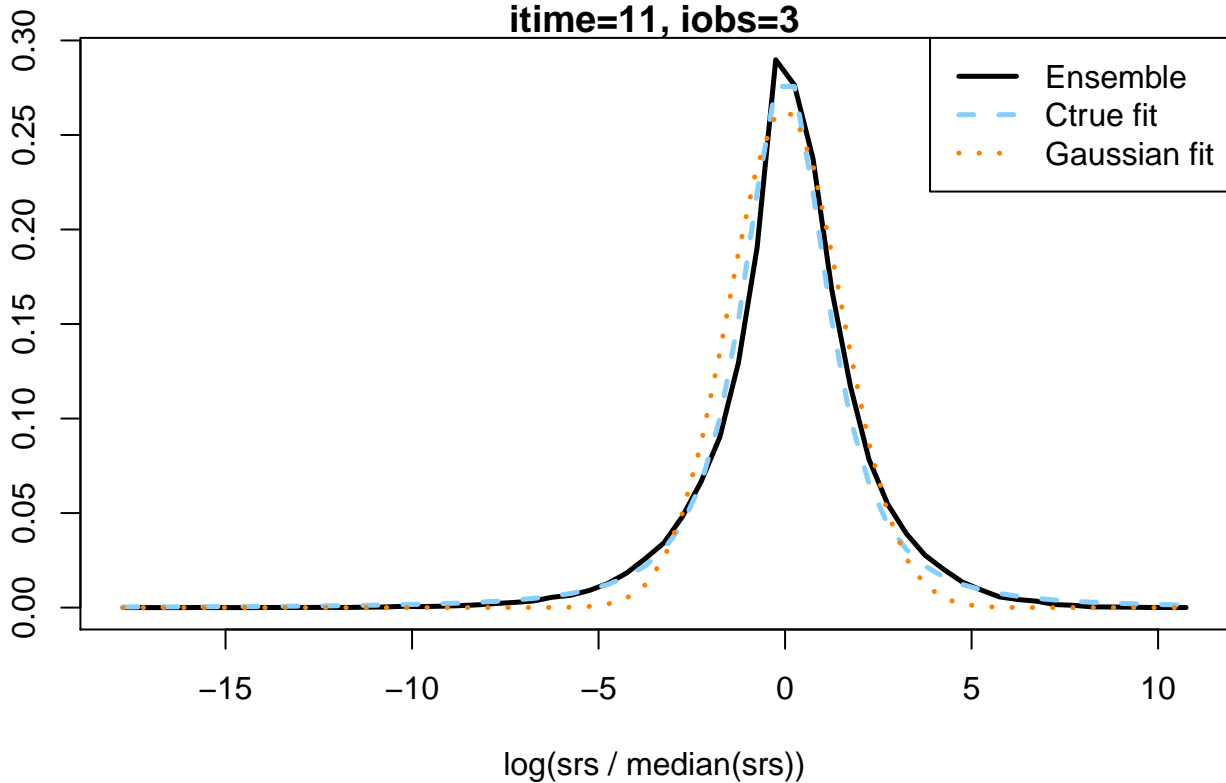

itime=11, iobs=4

density

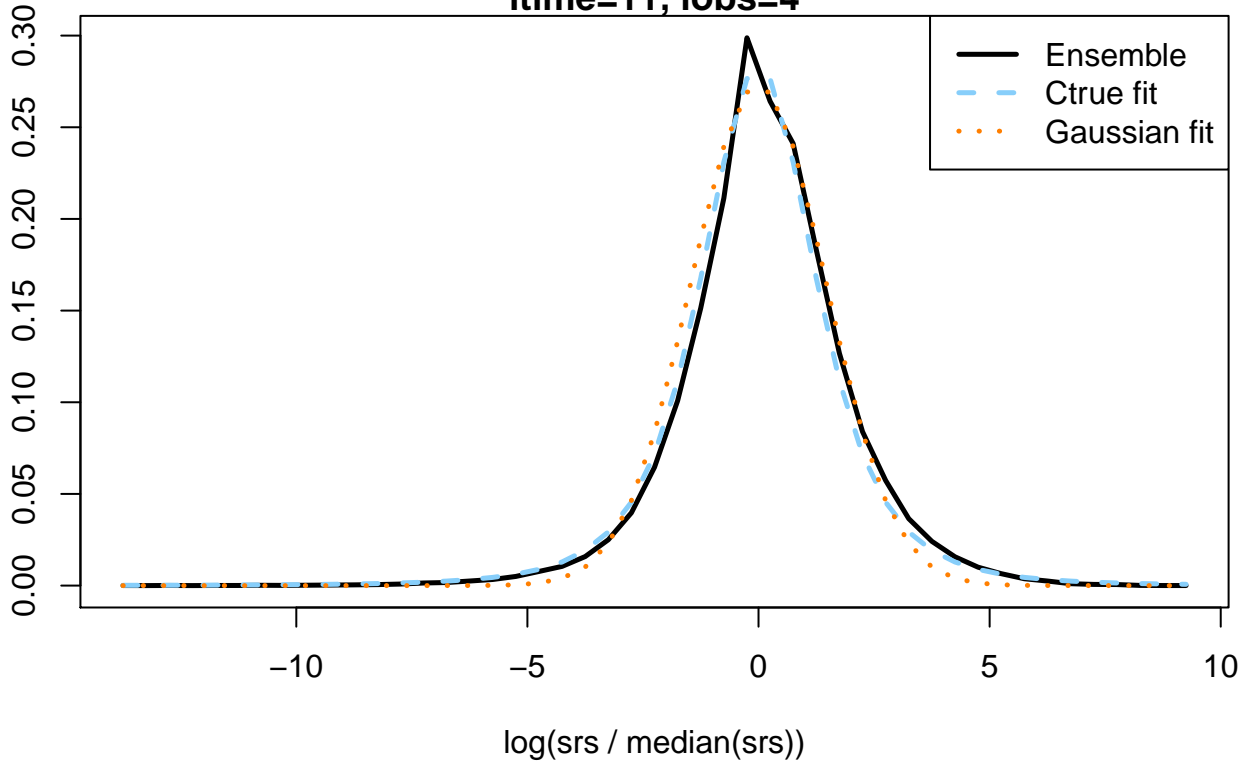

itime=11, iobs=5

density

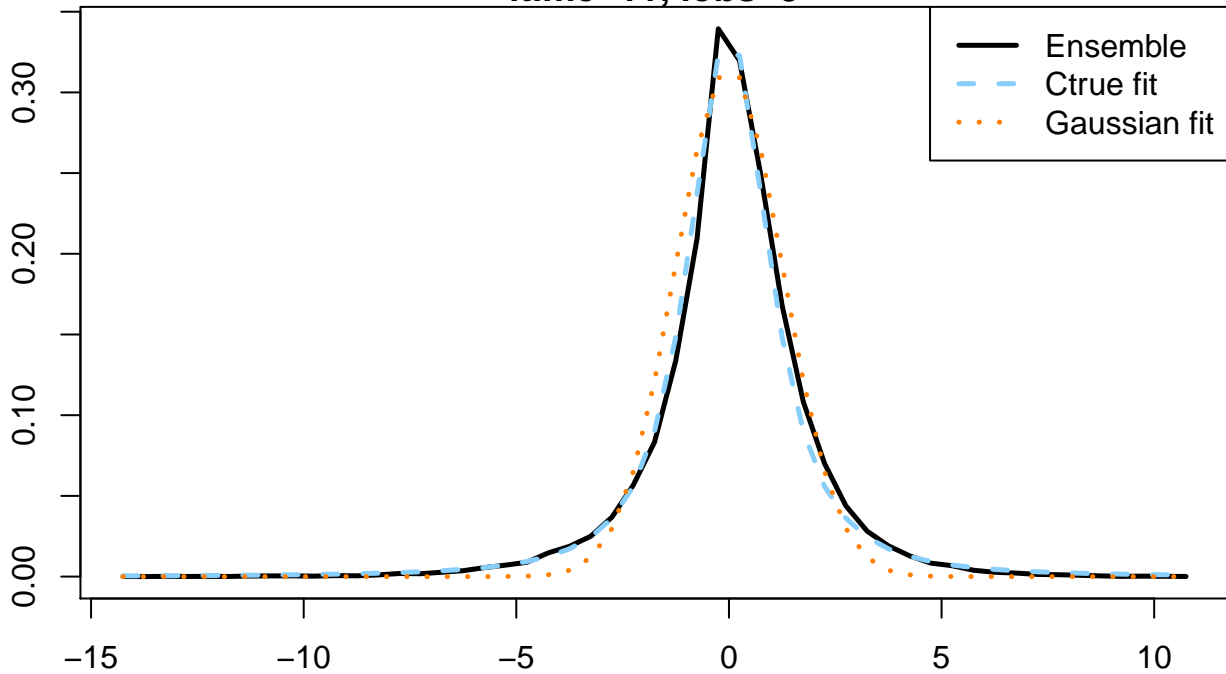

— Ensemble  
- - Ctrue fit  
... Gaussian fit

$\log(\text{srs} / \text{median}(\text{srs}))$

itime=11, iobs=6

density

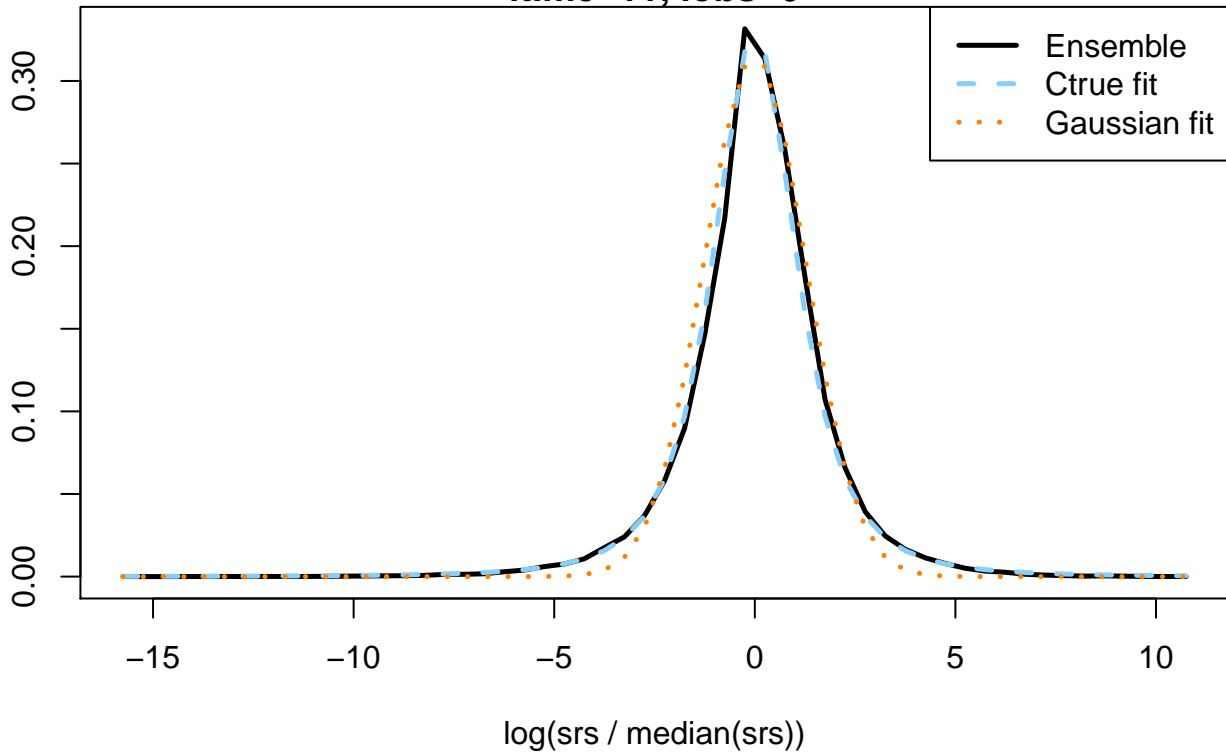

— Ensemble  
- - Ctrue fit  
... Gaussian fit

itime=11, iobs=7

density

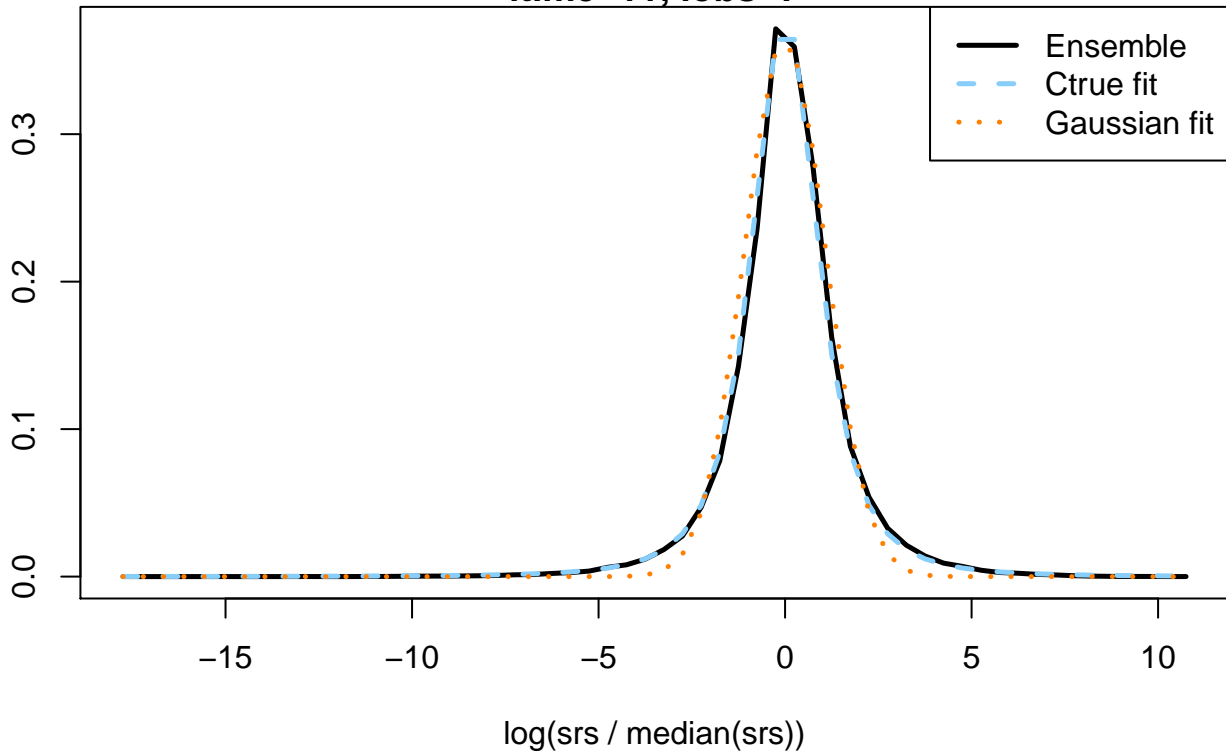

itime=11, iobs=8

density

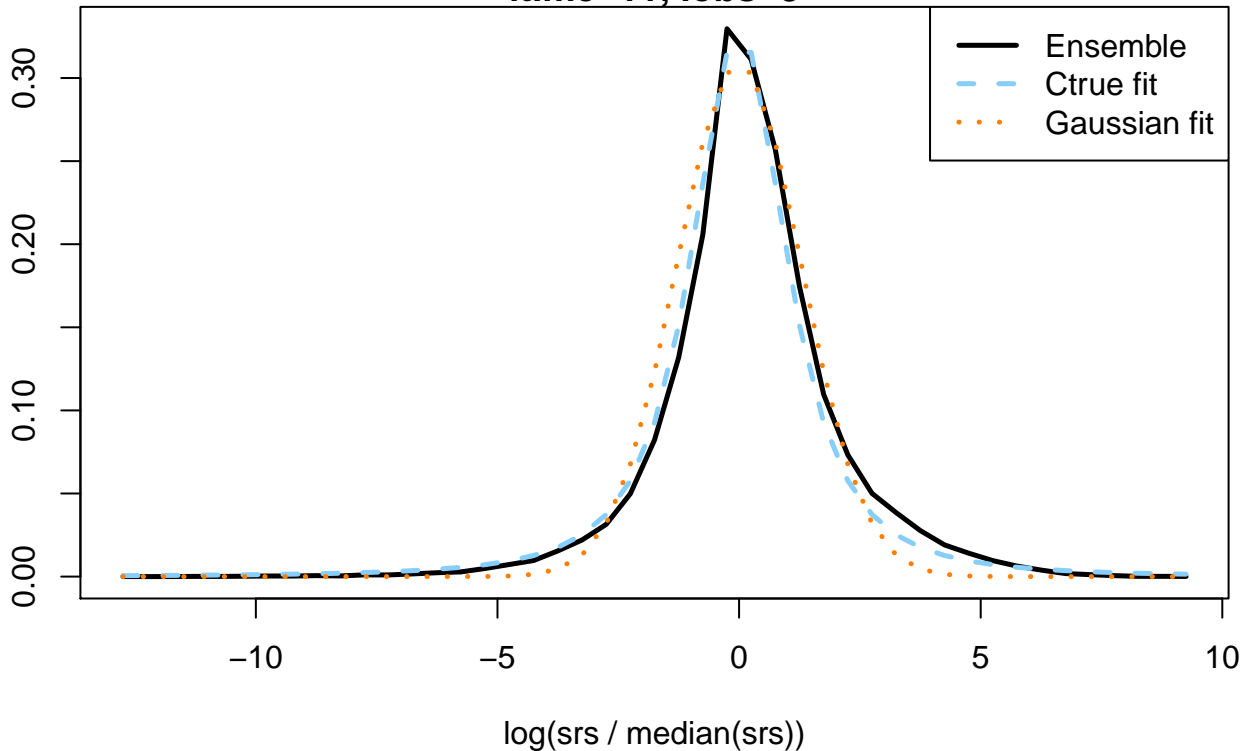

— Ensemble  
- - Ctrue fit  
... Gaussian fit



itime=11, iobs=9

density

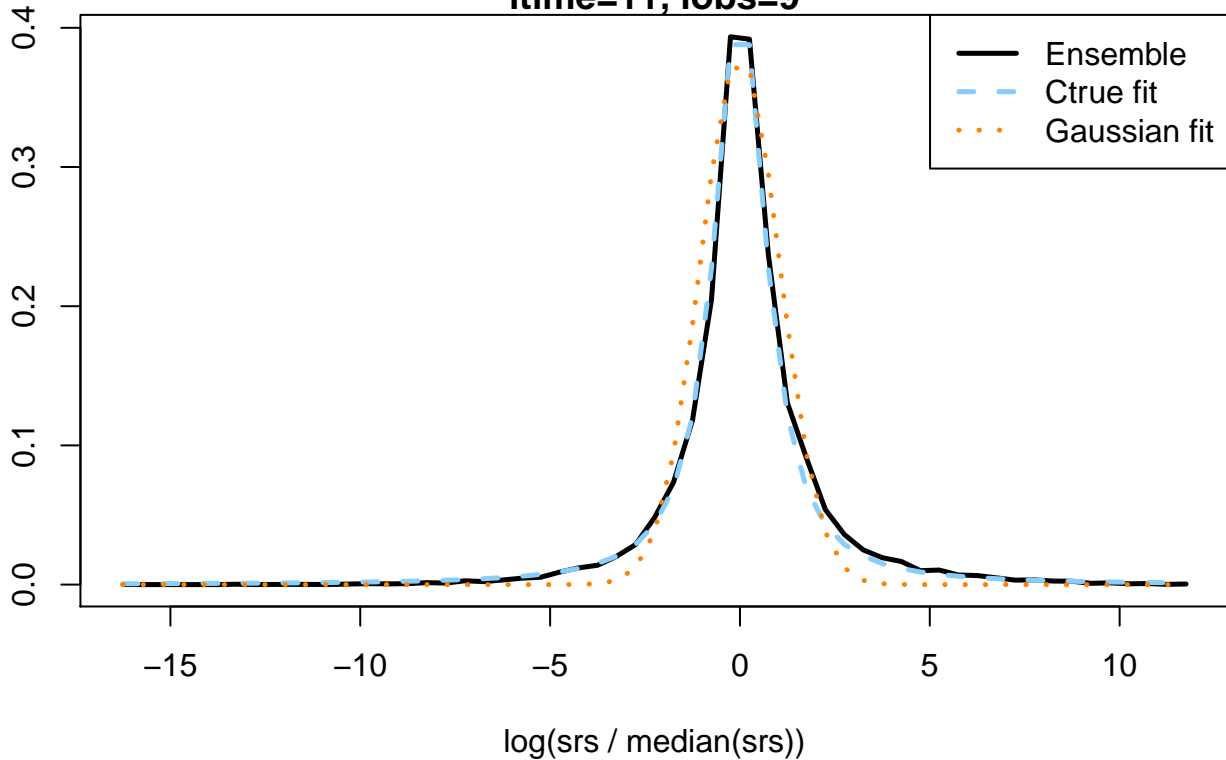

itime=12, iobs=10

density

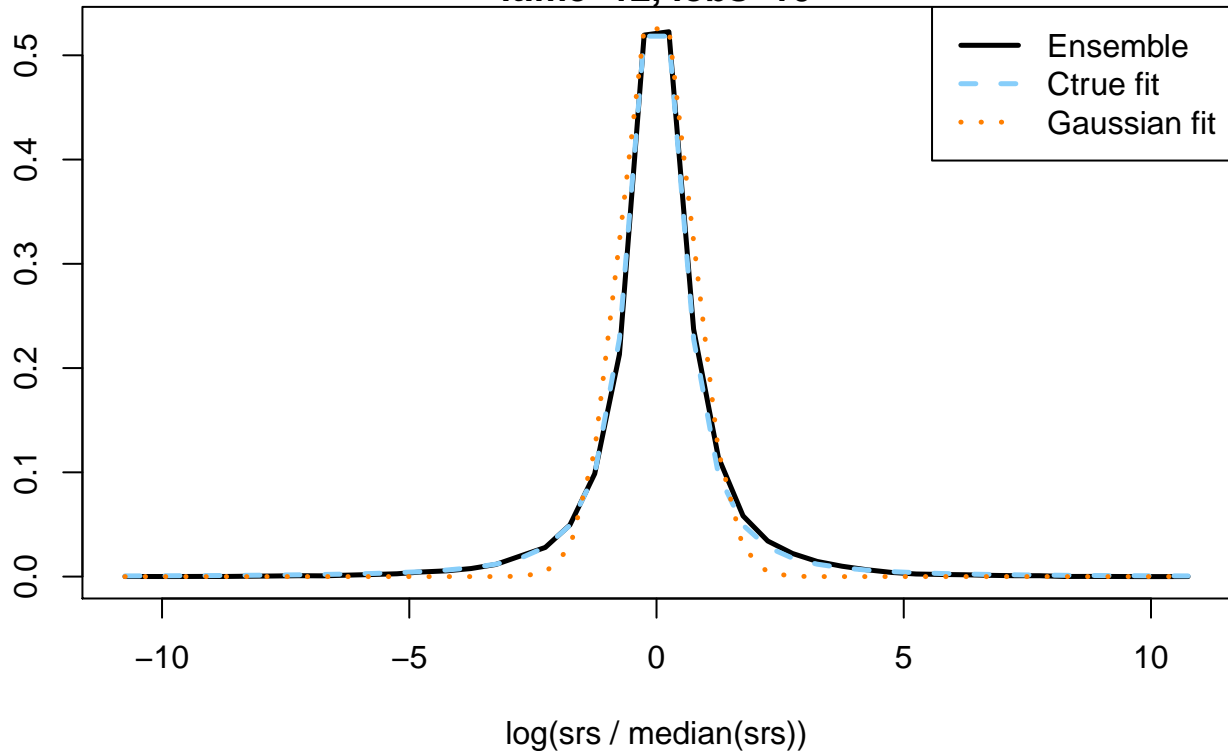

— Ensemble  
- - Ctrue fit  
... Gaussian fit

itime=12, iobs=11

density

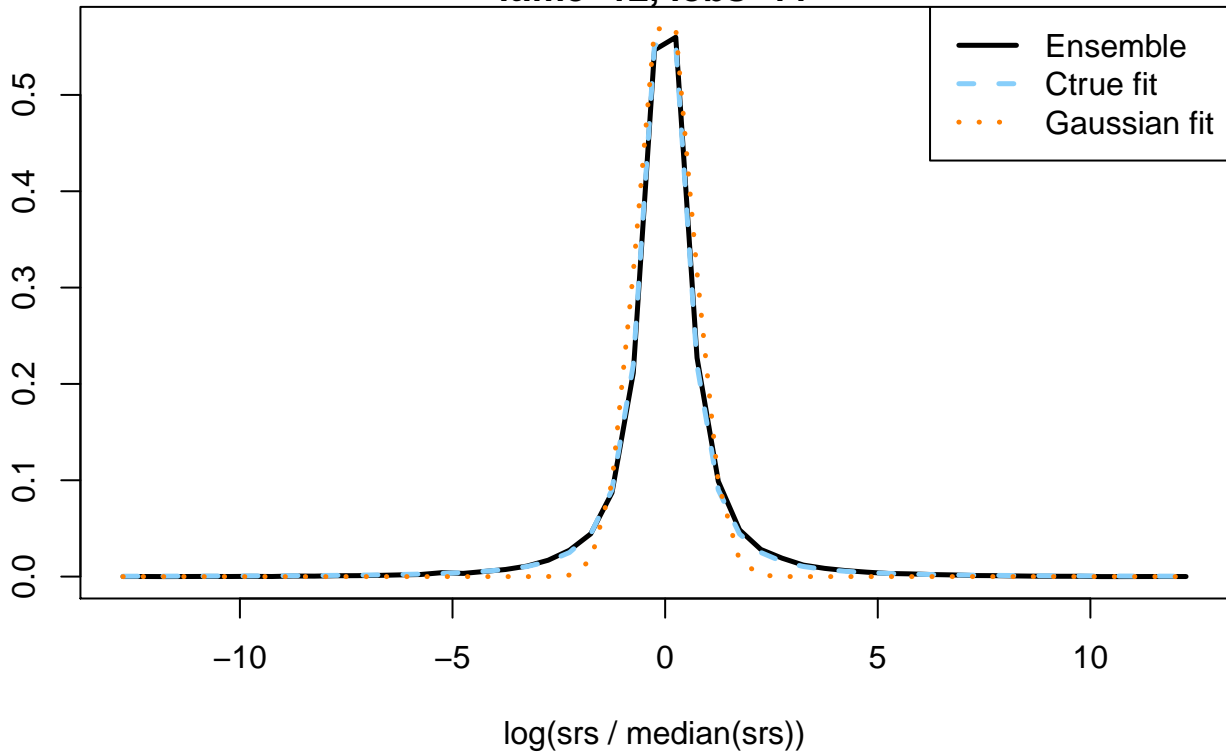

— Ensemble  
- - Ctrue fit  
... Gaussian fit

itime=12, iobs=12

density

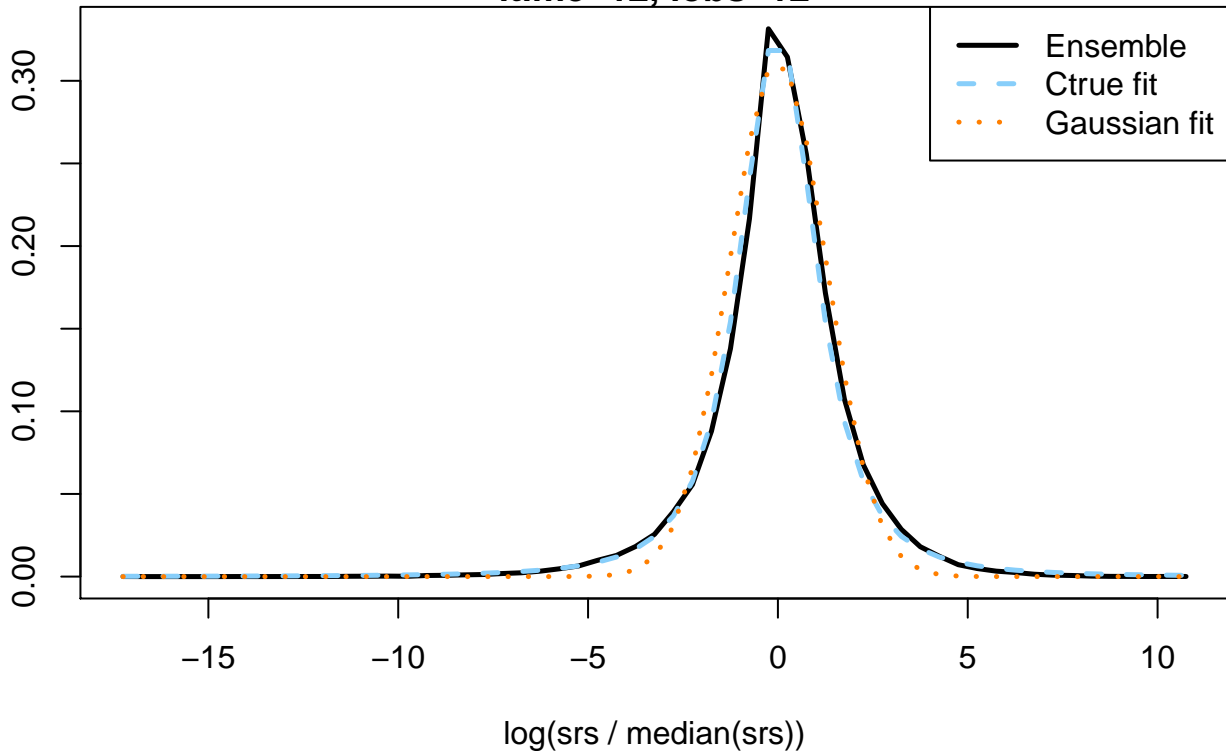

— Ensemble  
- - Ctrue fit  
... Gaussian fit

itime=12, iobs=1

density

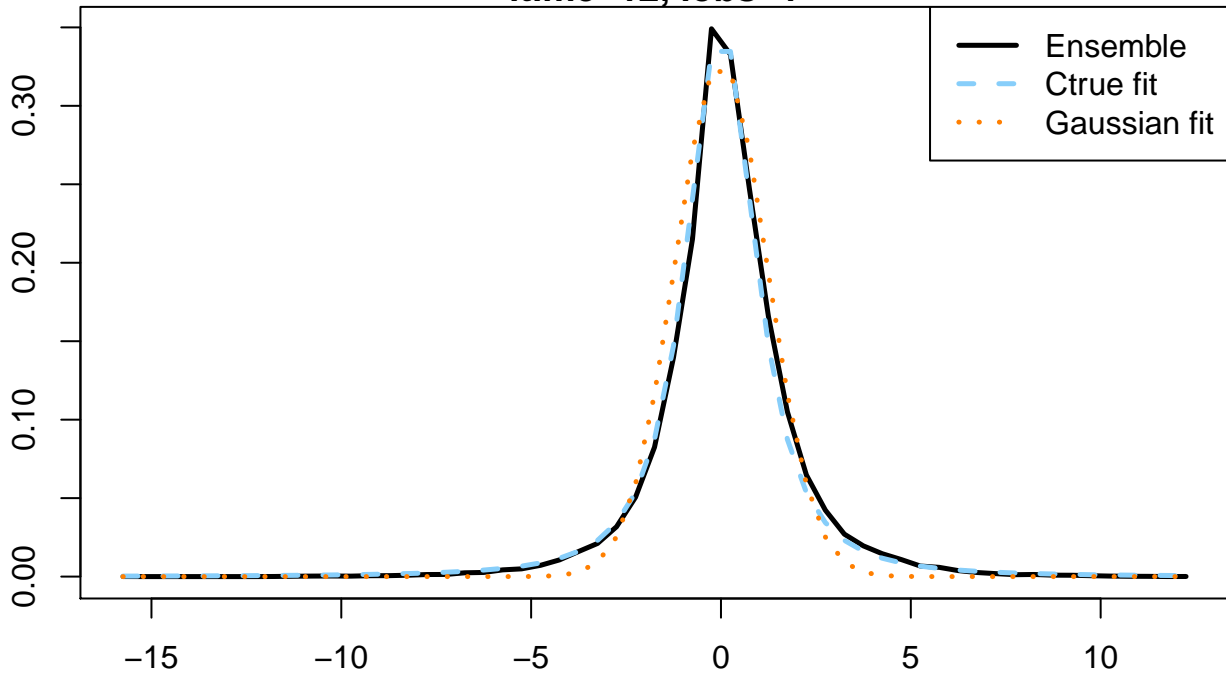

log(srs / median(srs))

itime=12, iobs=2

density

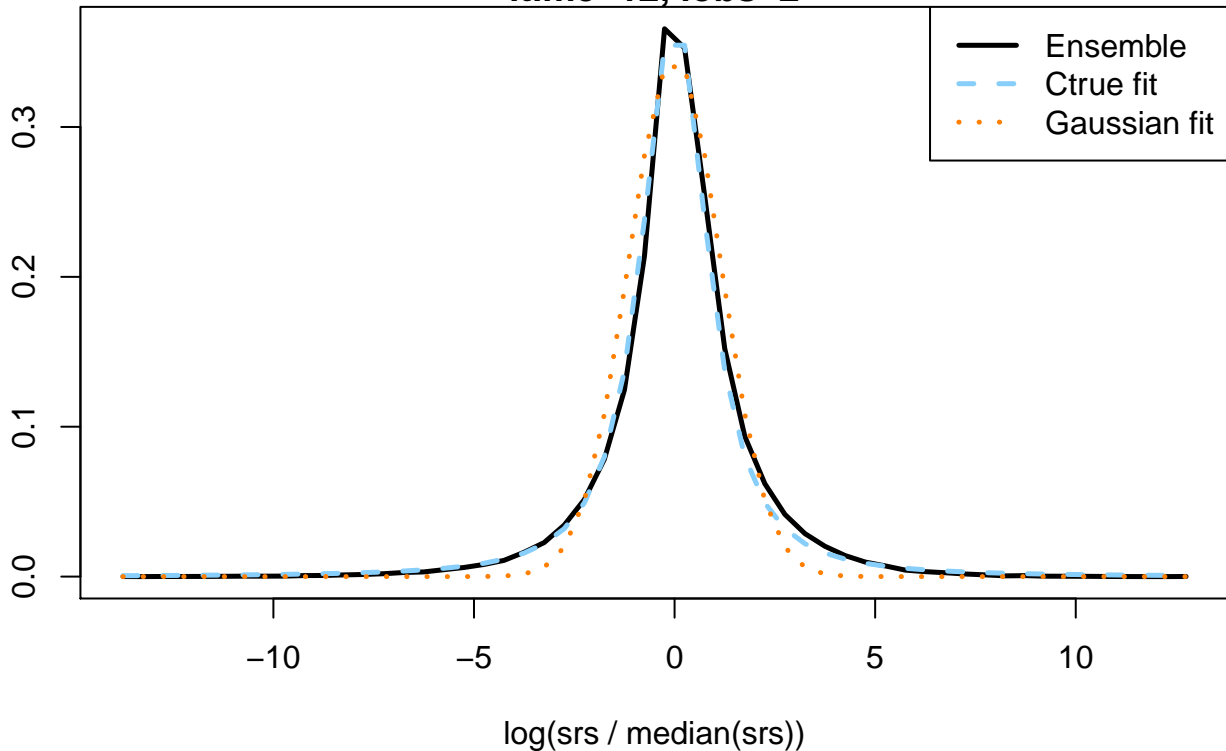

itime=12, iobs=3

density

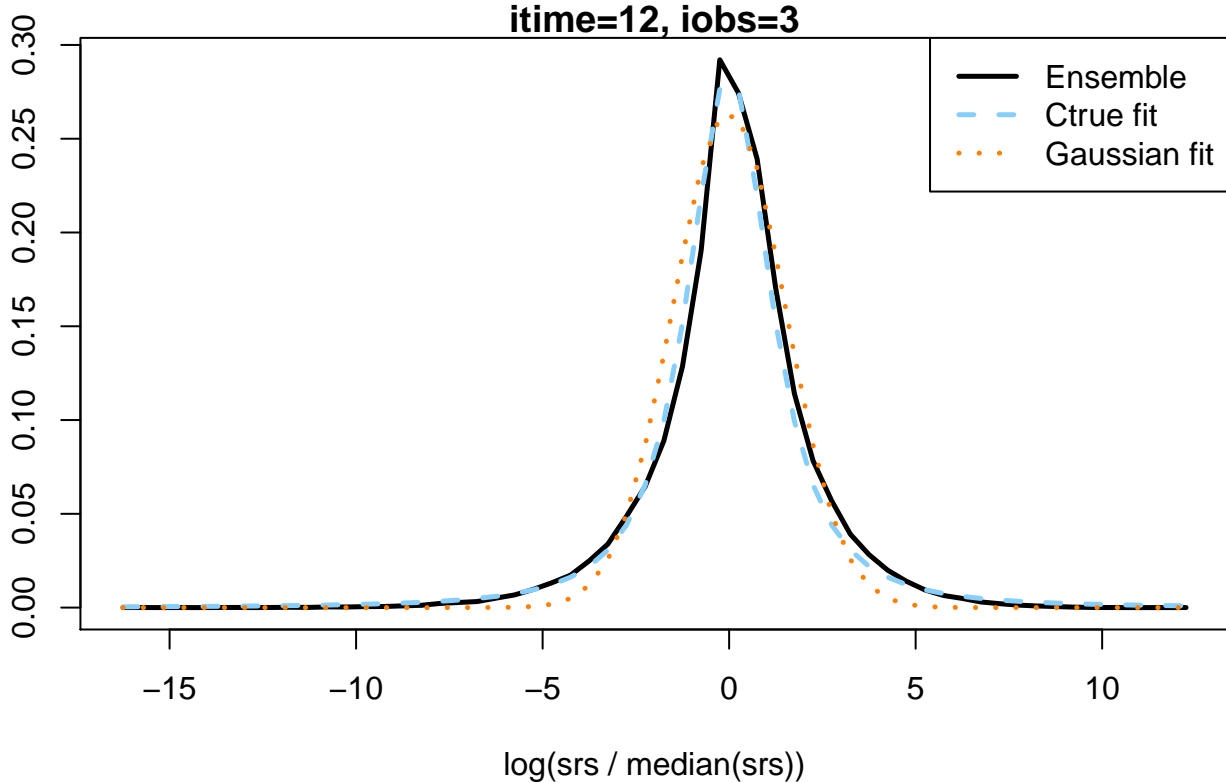

— Ensemble  
- - Ctrue fit  
... Gaussian fit

$\log(\text{srs} / \text{median}(\text{srs}))$

itime=12, iobs=4

density

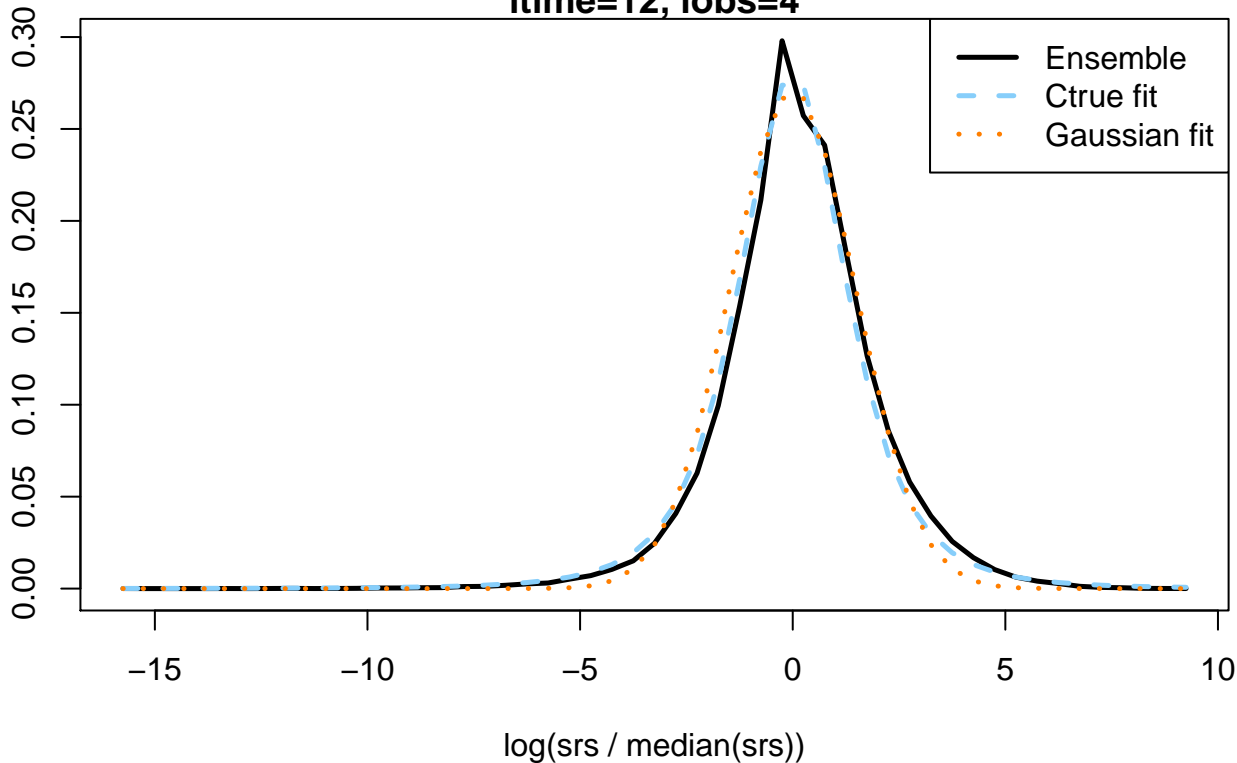



itime=12, iobs=5

density

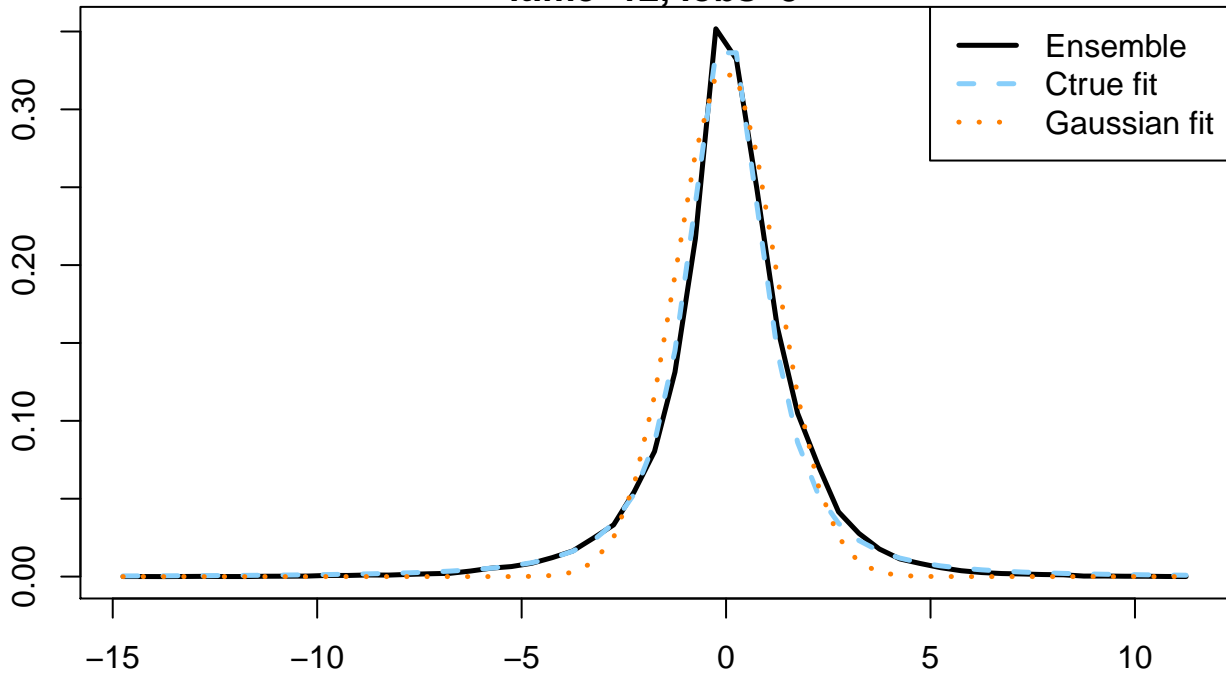

log(srs / median(srs))

itime=12, iobs=6

density

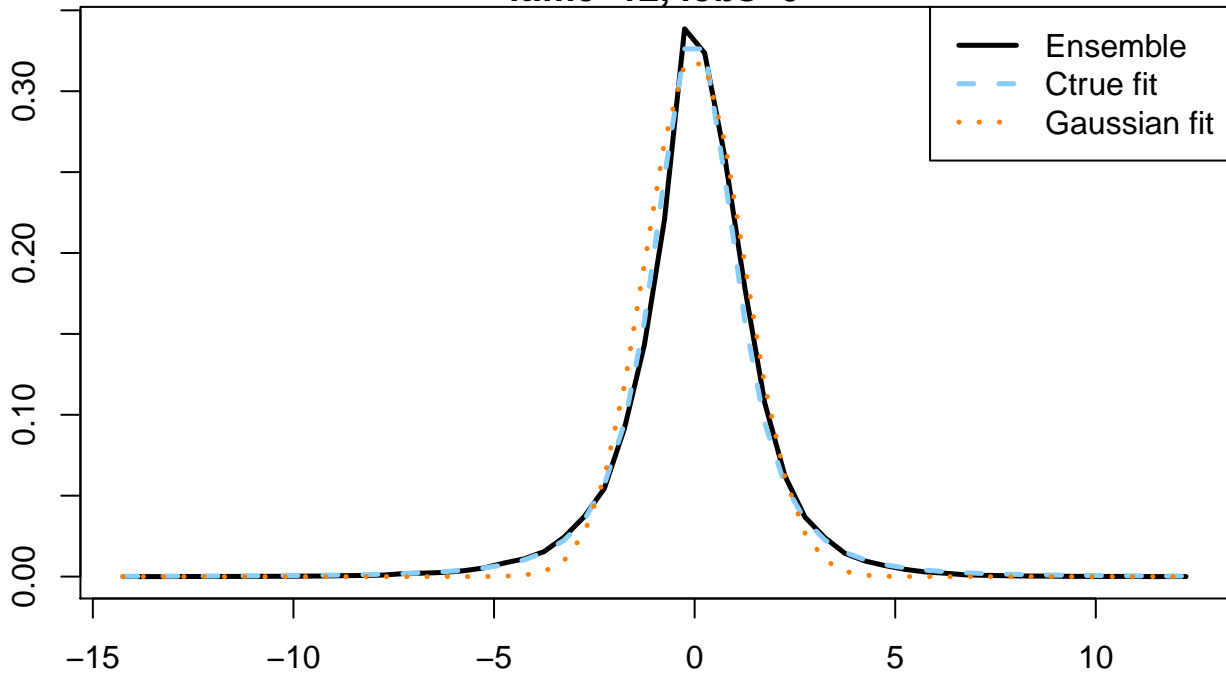

log(srs / median(srs))

itime=12, iobs=7

density

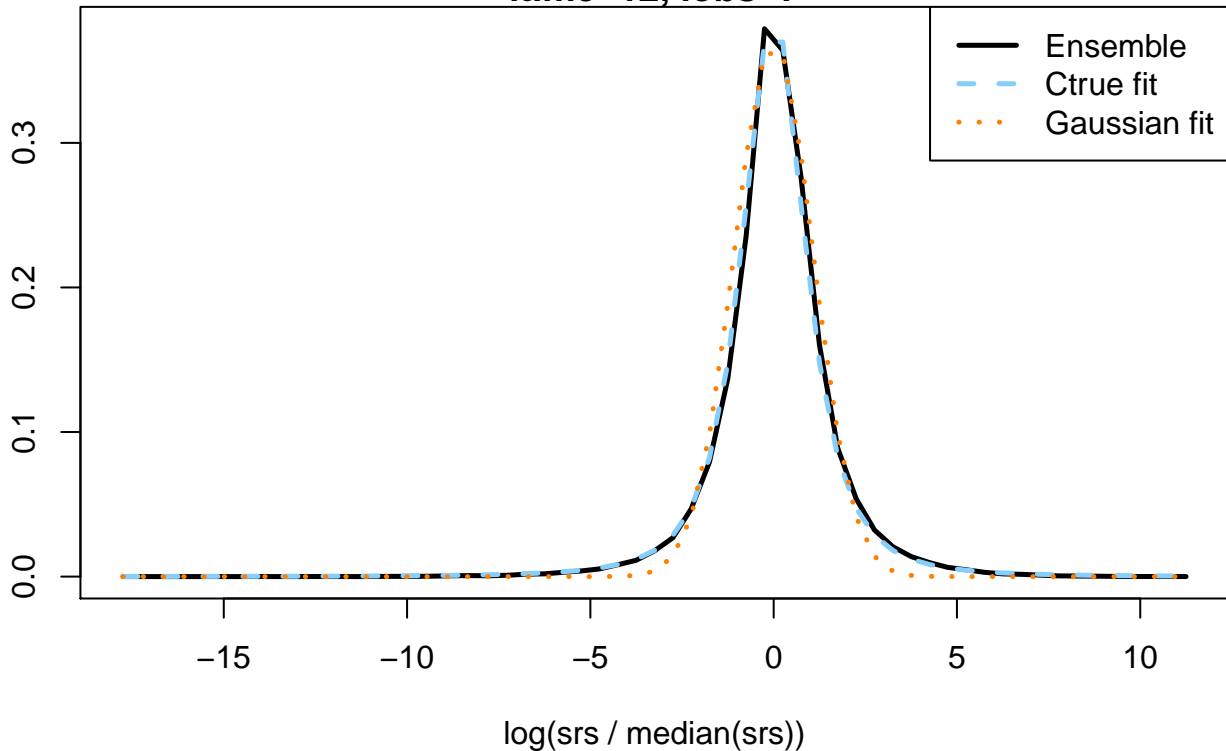

itime=12, iobs=8

density

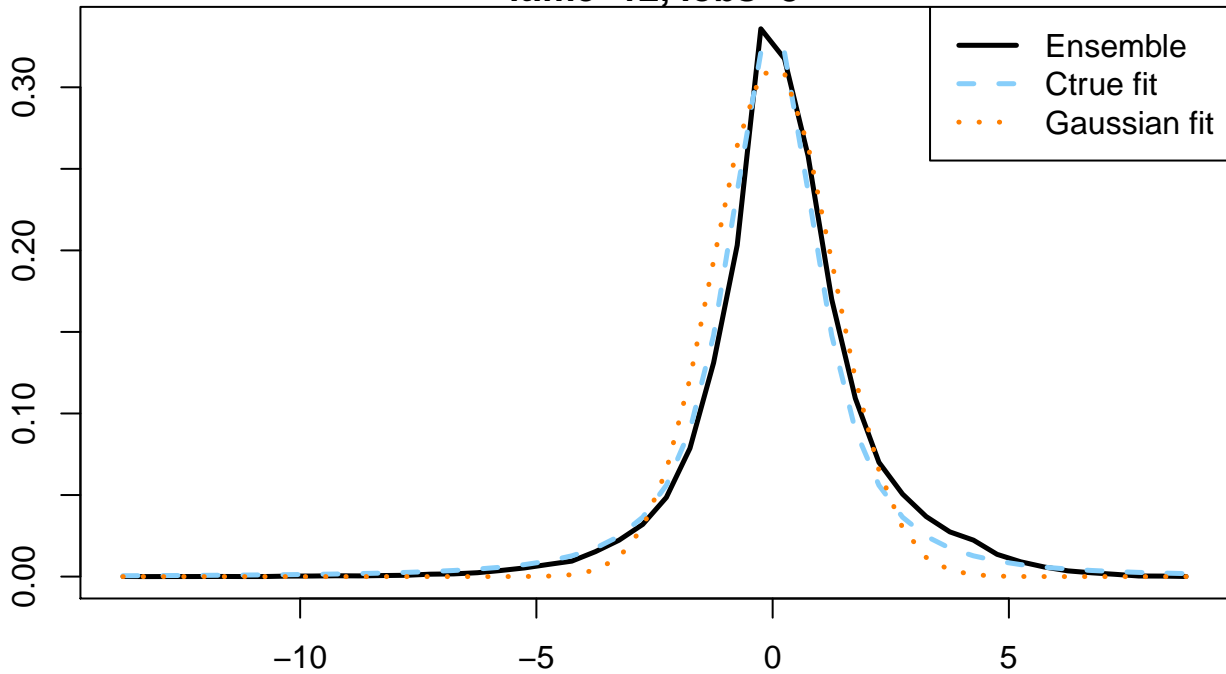

log(srs / median(srs))

itime=12, iobs=9

density

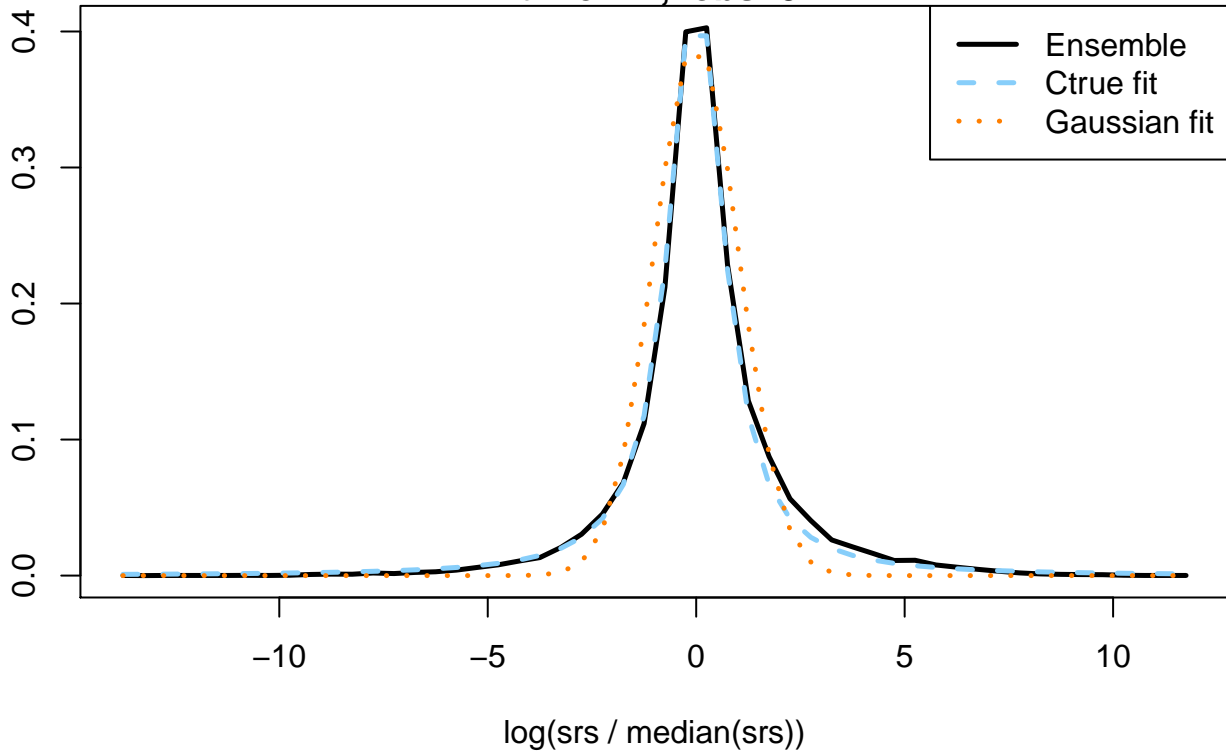

itime=13, iobs=10

density

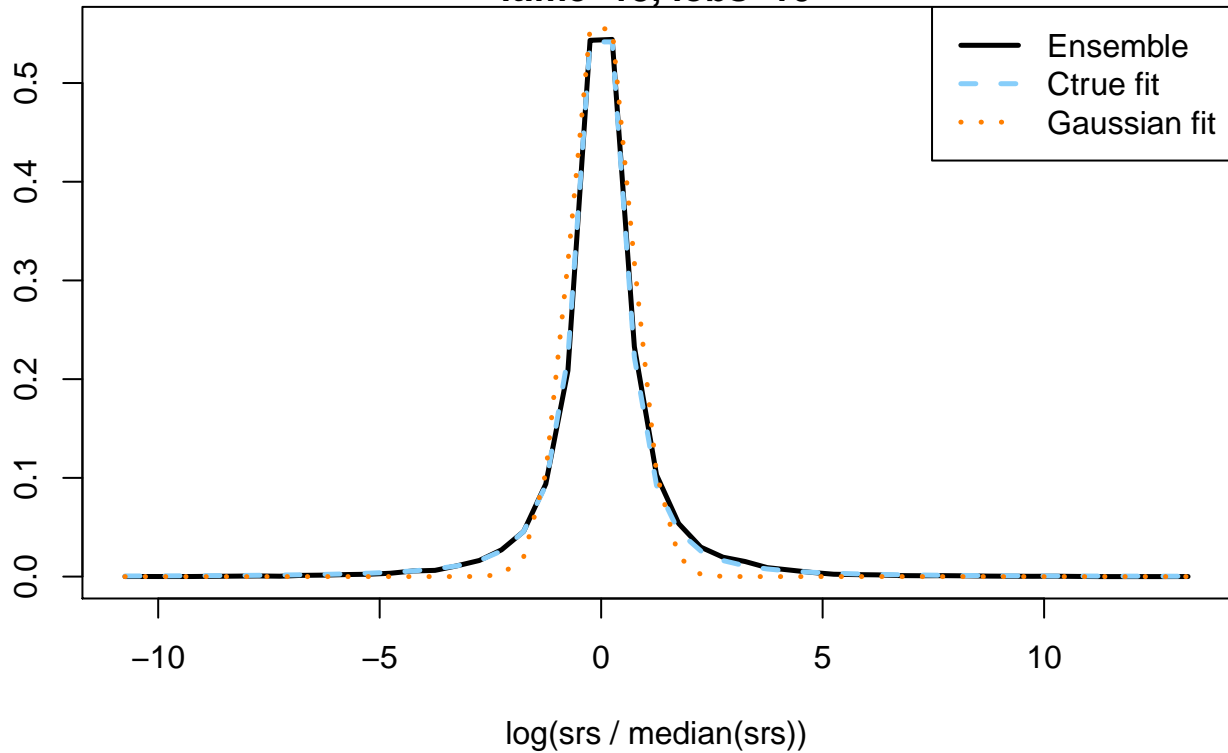

itime=13, iobs=11

density

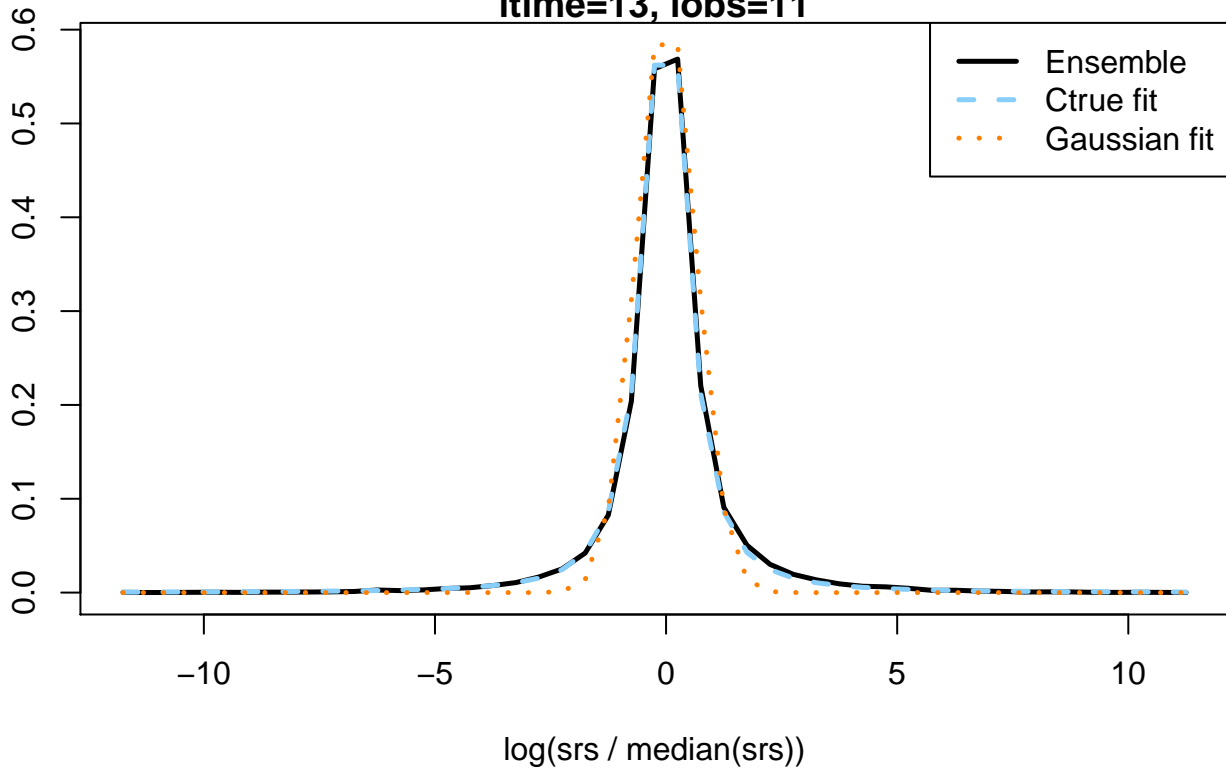

itime=13, iobs=12

density

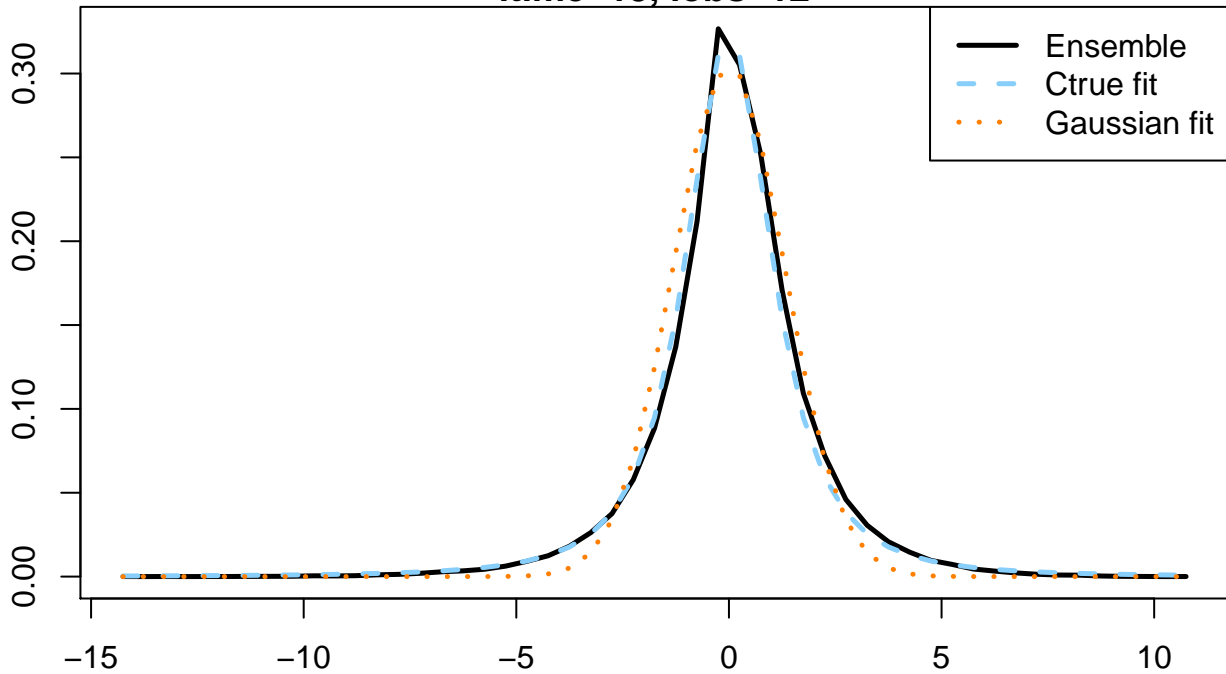

$\log(\text{srs} / \text{median}(\text{srs}))$



itime=13, iobs=1

density

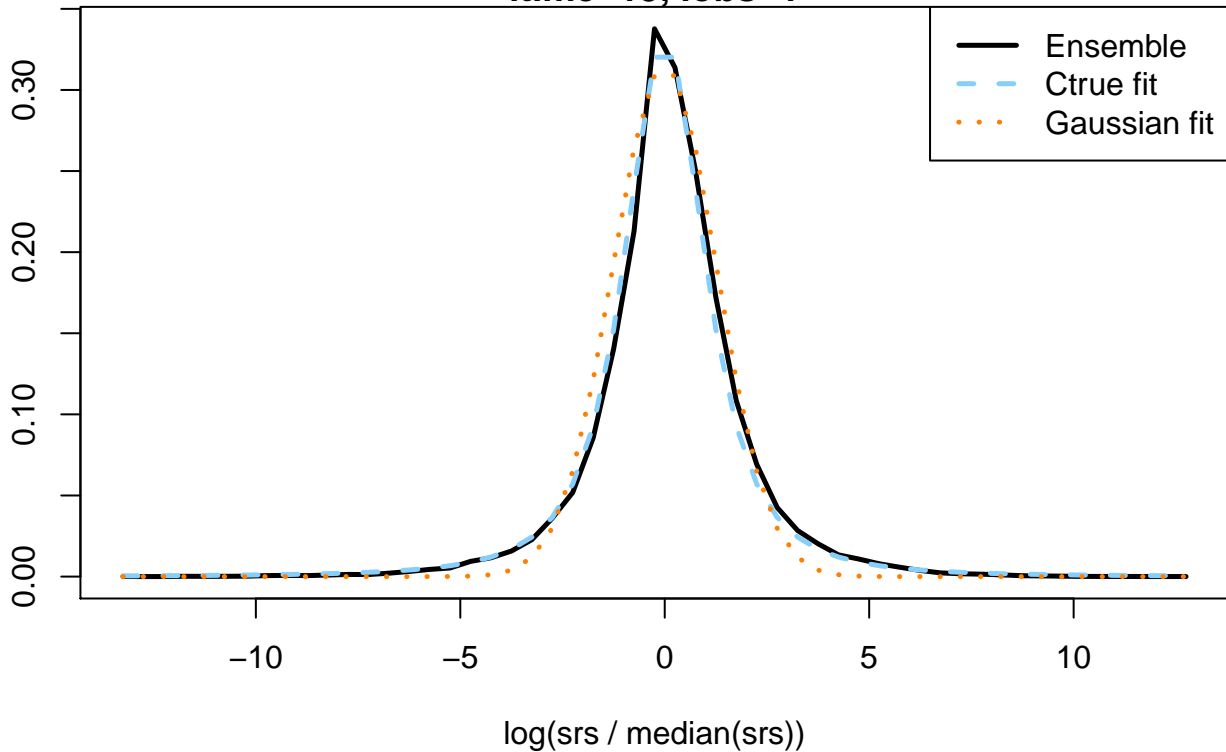

— Ensemble  
- - Ctrue fit  
... Gaussian fit

itime=13, iobs=2

density

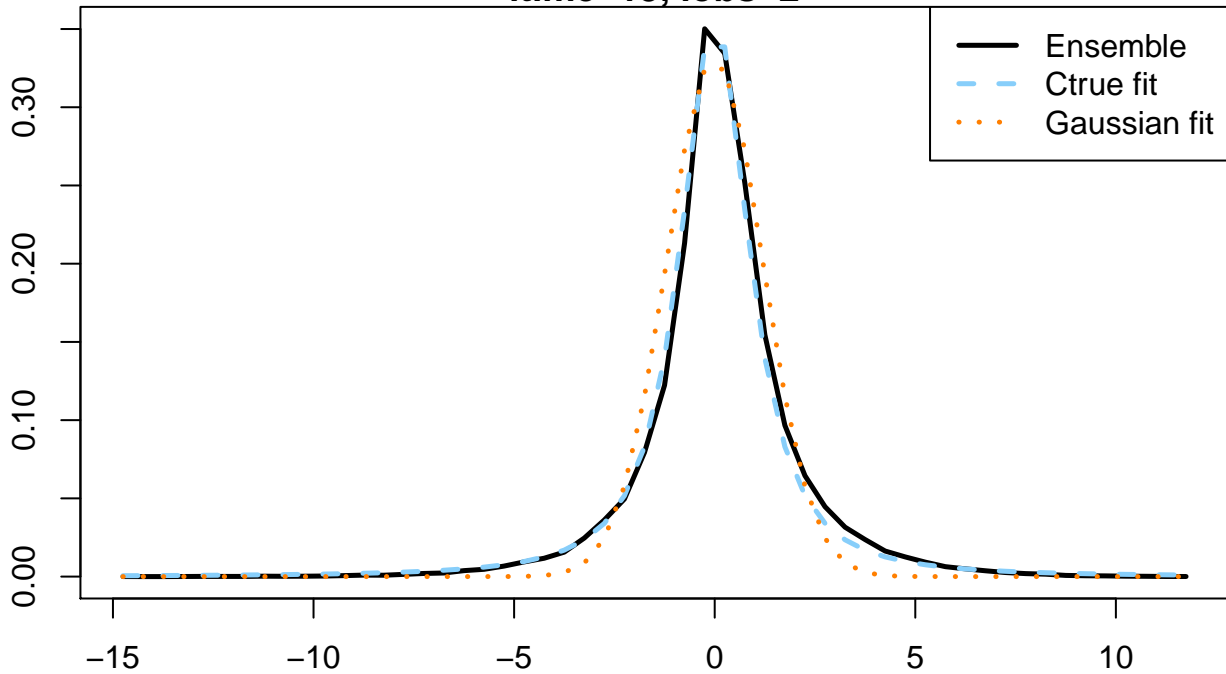

log(srs / median(srs))

itime=13, iobs=3

density

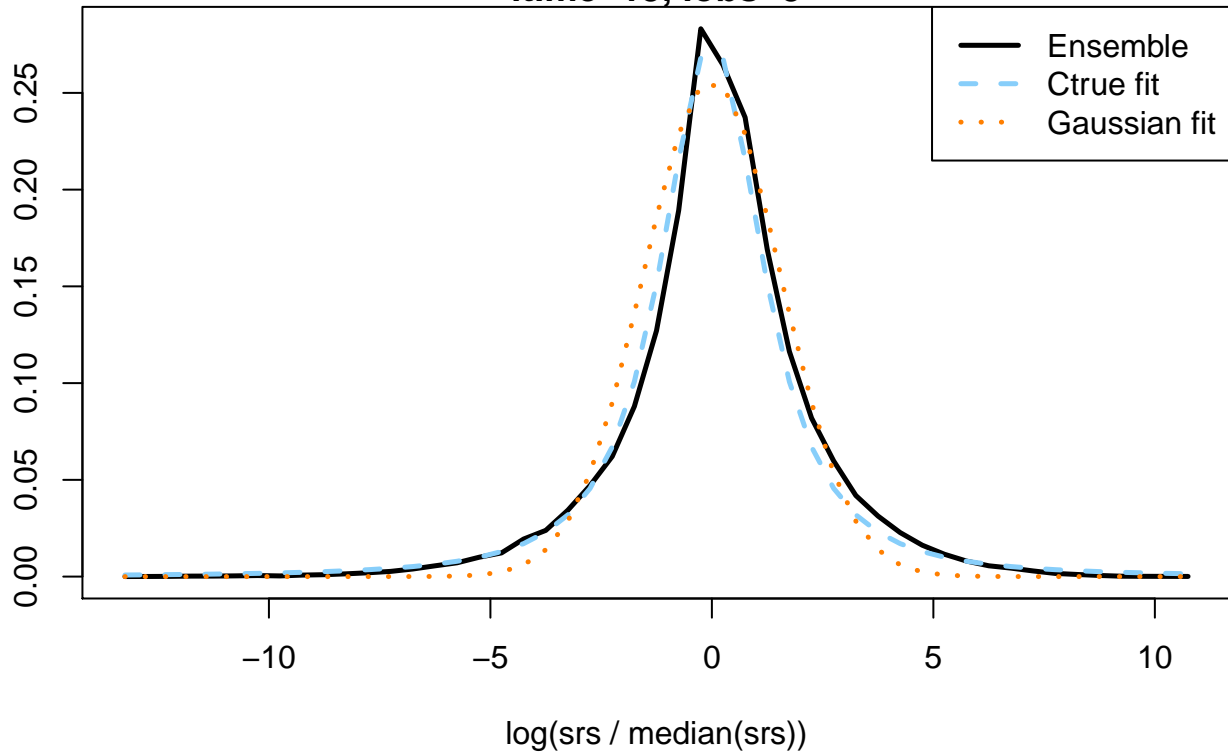

itime=13, iobs=4

density

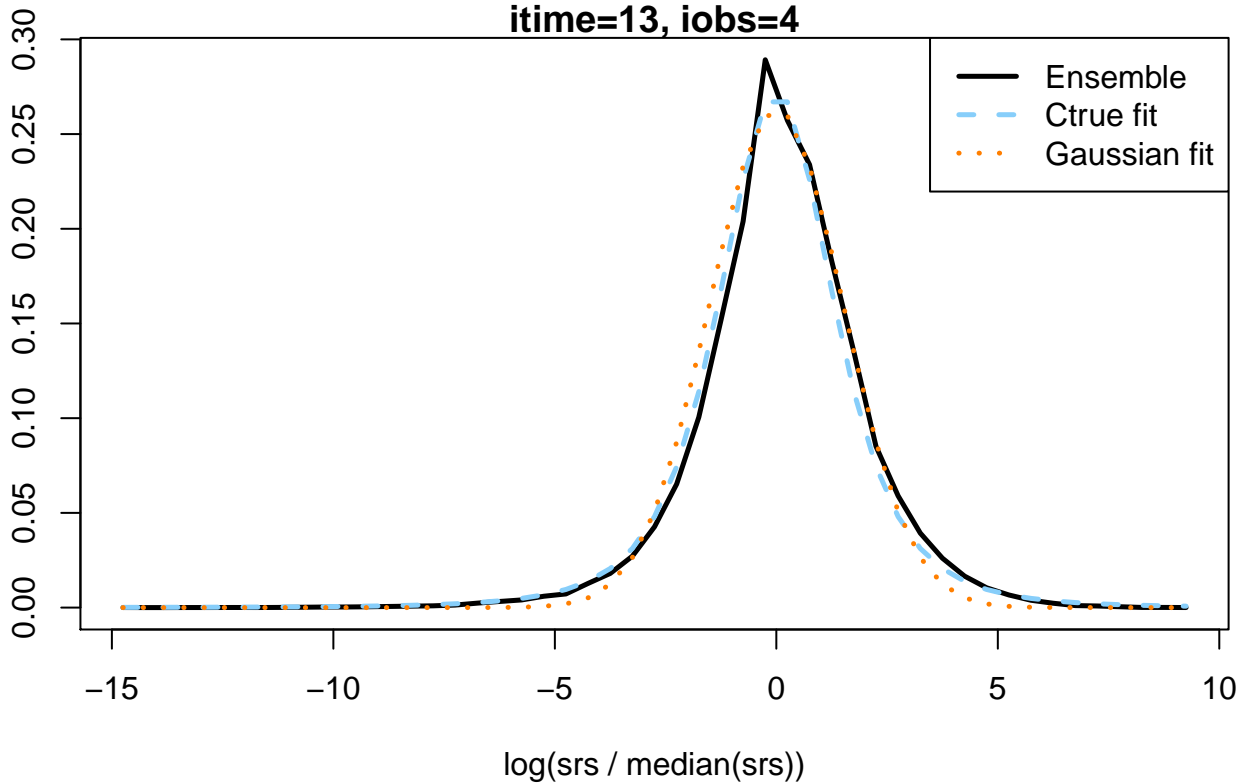

itime=13, iobs=5

density

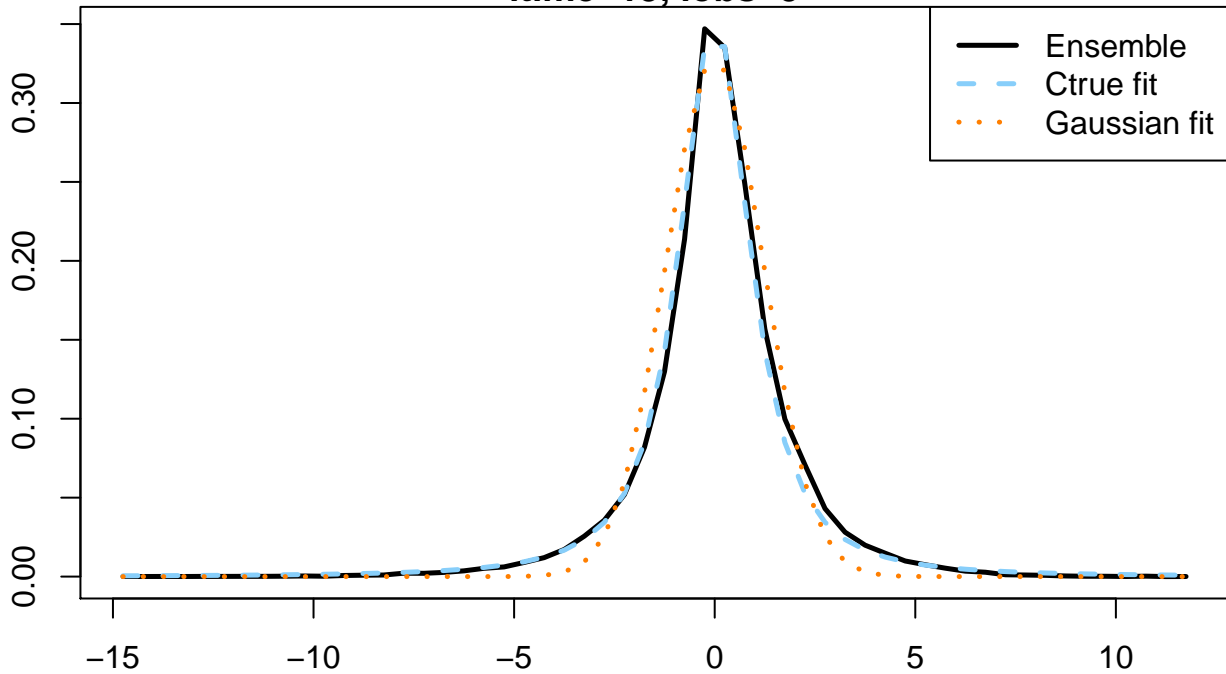

— Ensemble  
- - Ctrue fit  
... Gaussian fit

$\log(\text{srs} / \text{median}(\text{srs}))$

itime=13, iobs=6

density

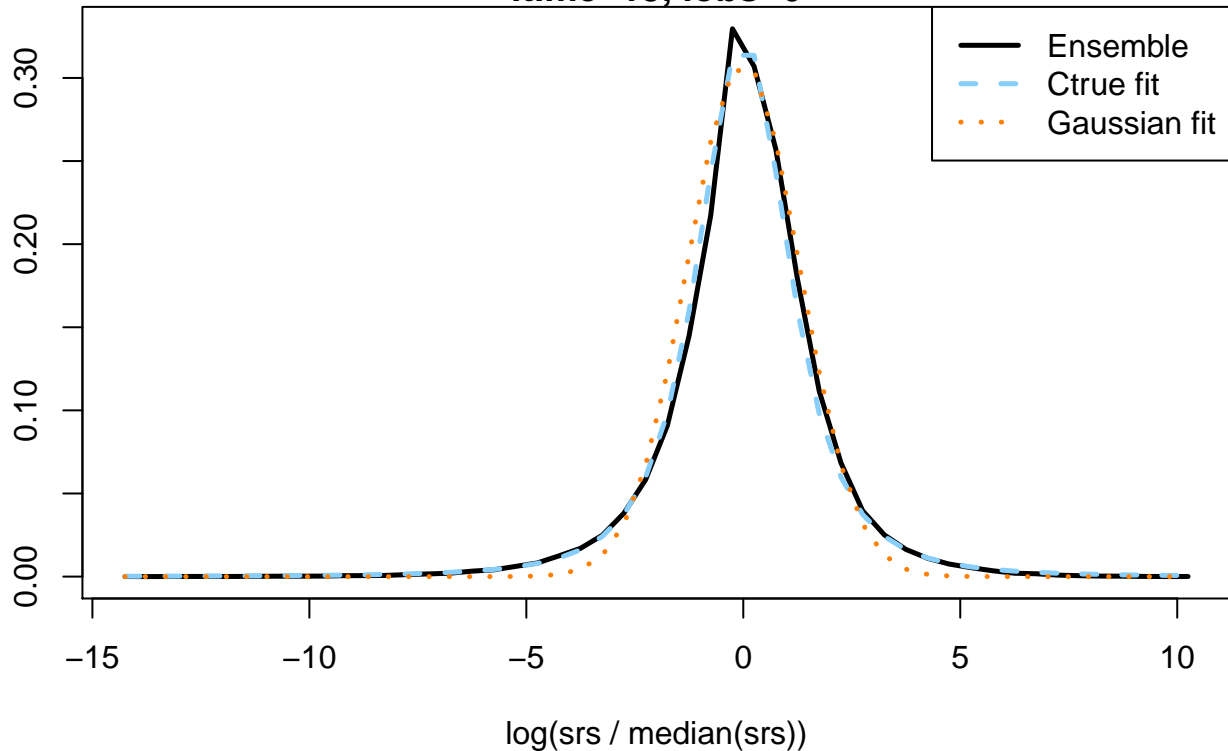

itime=13, iobs=7

density

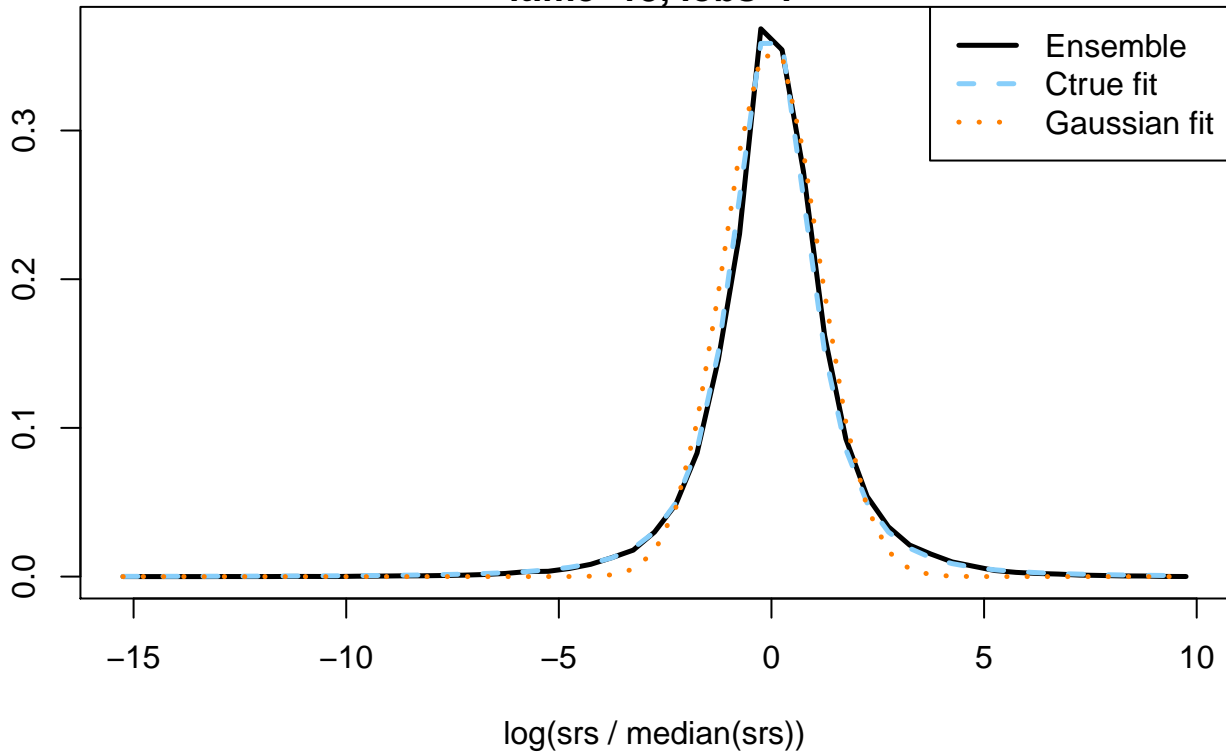

— Ensemble  
- - Ctrue fit  
... Gaussian fit

itime=13, iobs=8

density

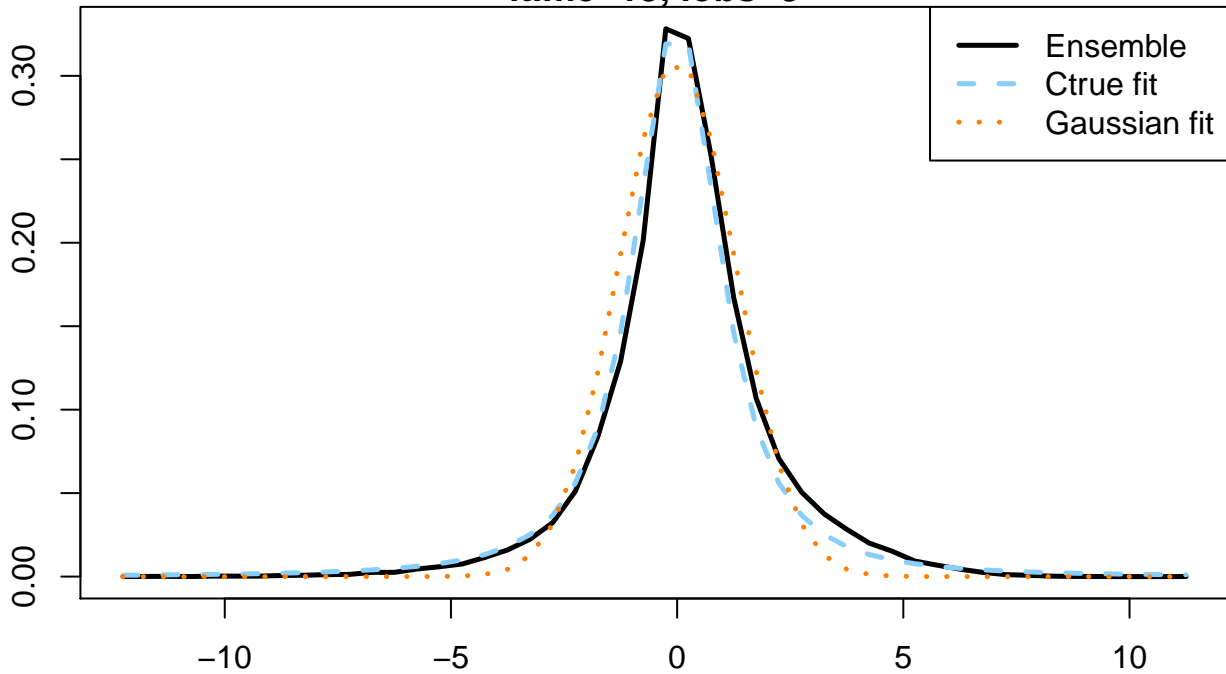

— Ensemble  
- - Ctrue fit  
... Gaussian fit

$\log(\text{srs} / \text{median}(\text{srs}))$



itime=13, iobs=9

density

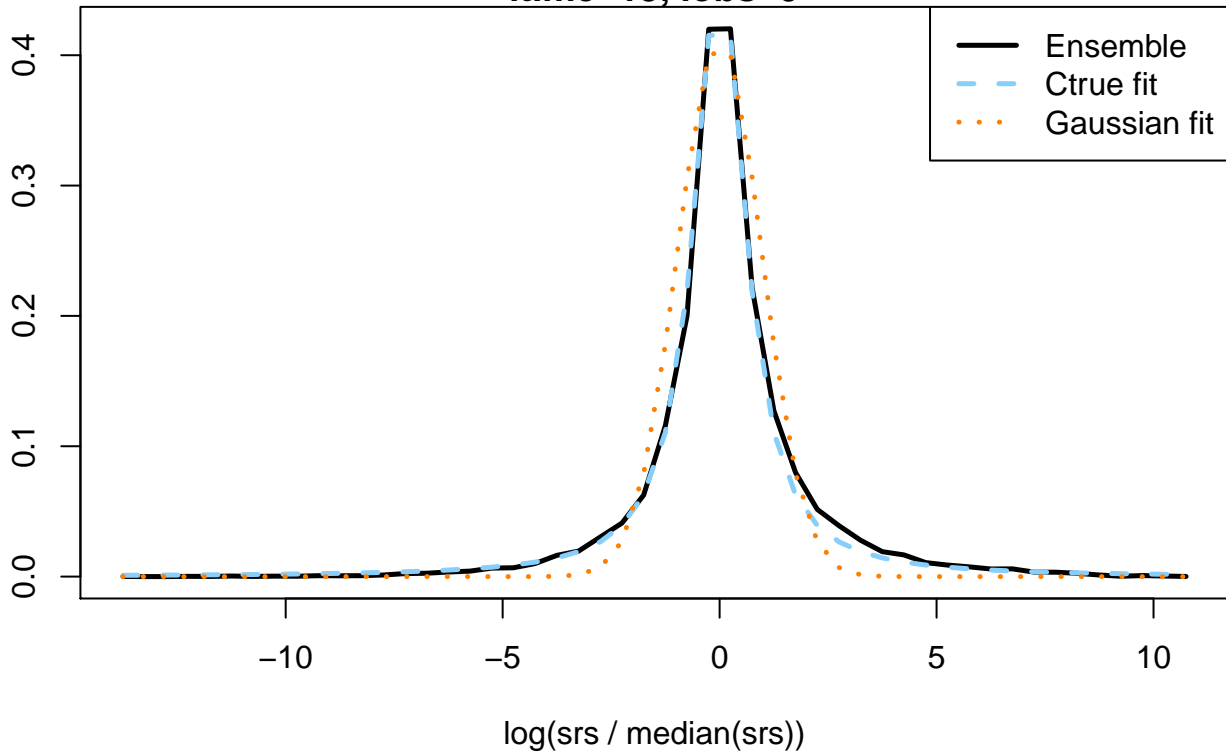

itime=14, iobs=10

density

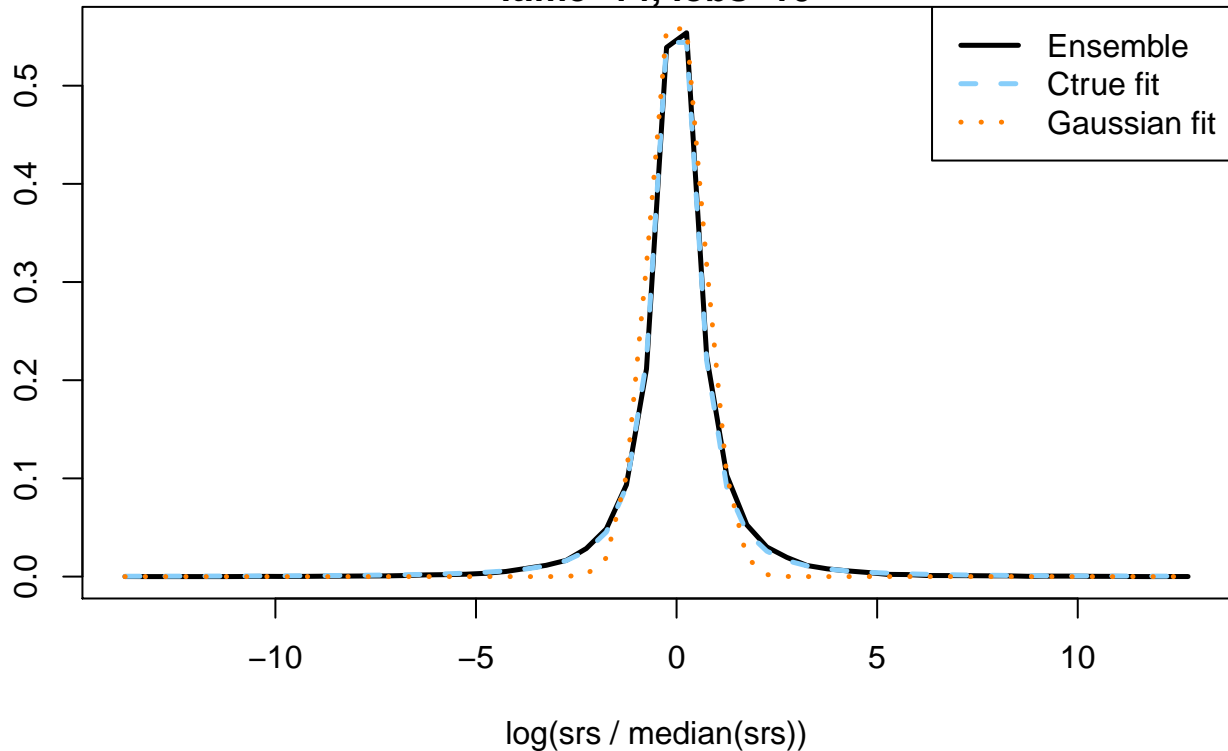

— Ensemble  
- - Ctrue fit  
... Gaussian fit

itime=14, iobs=11

density

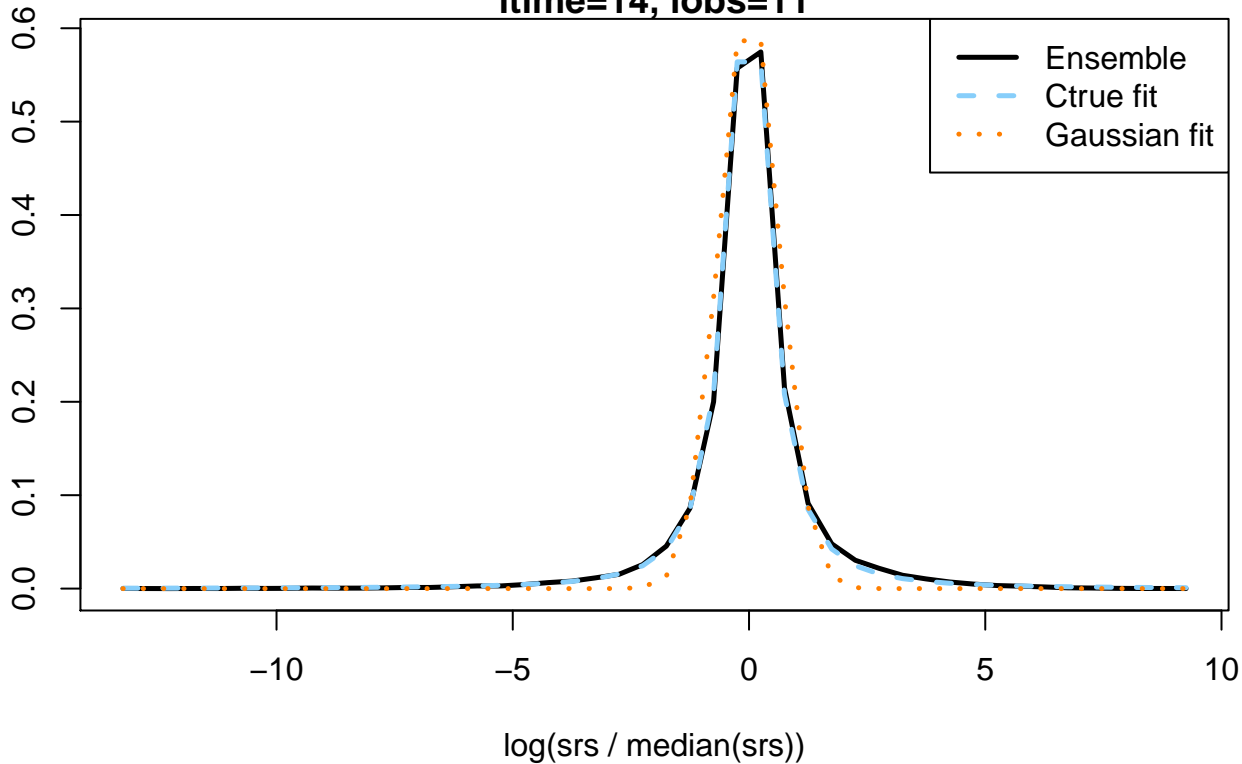

itime=14, iobs=12

density

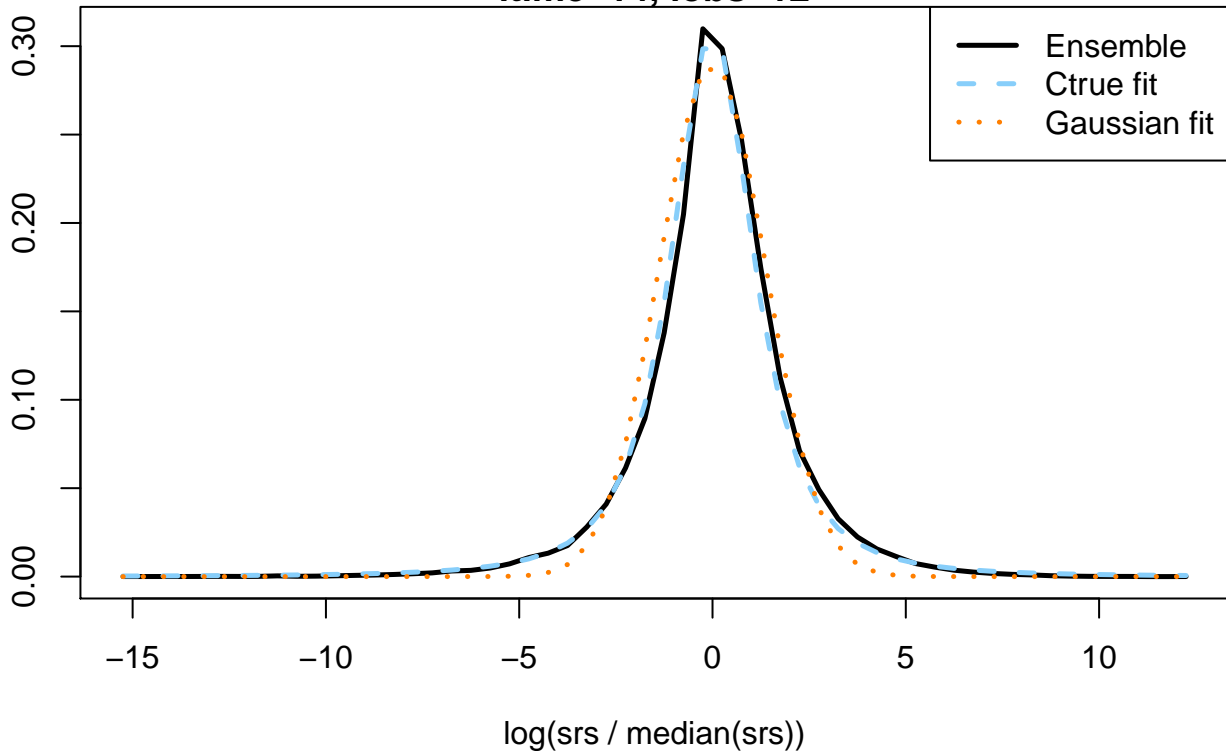

itime=14, iobs=1

density

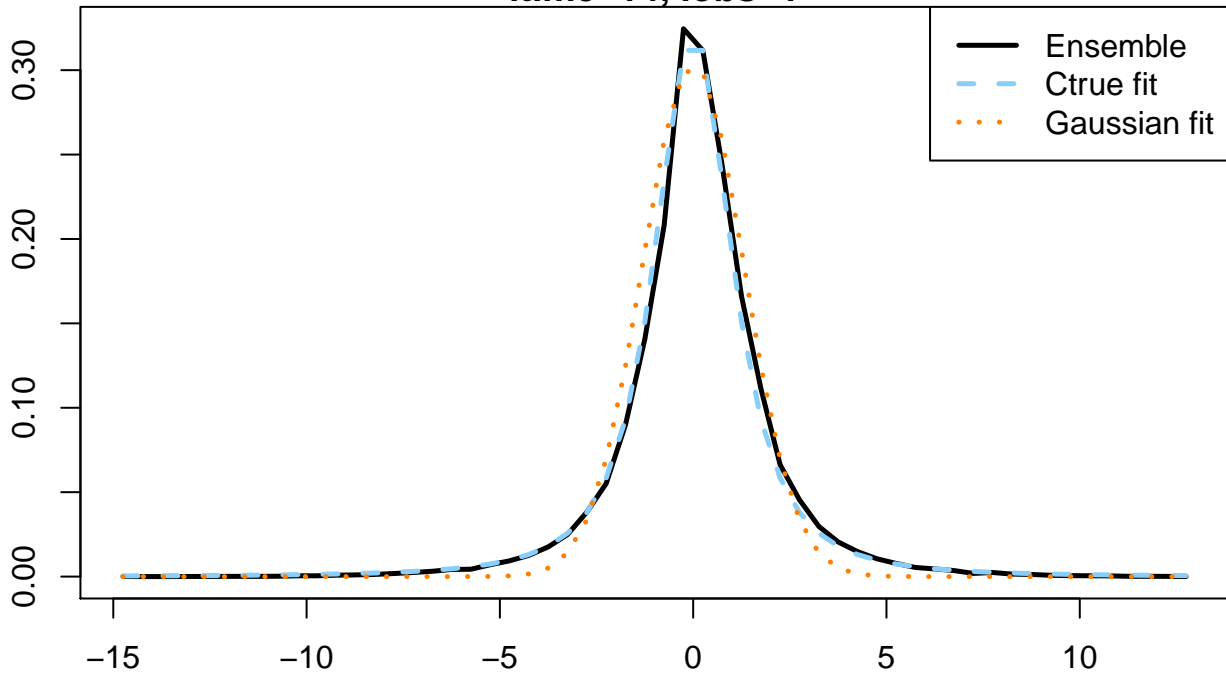

log(srs / median(srs))

itime=14, iobs=2

density

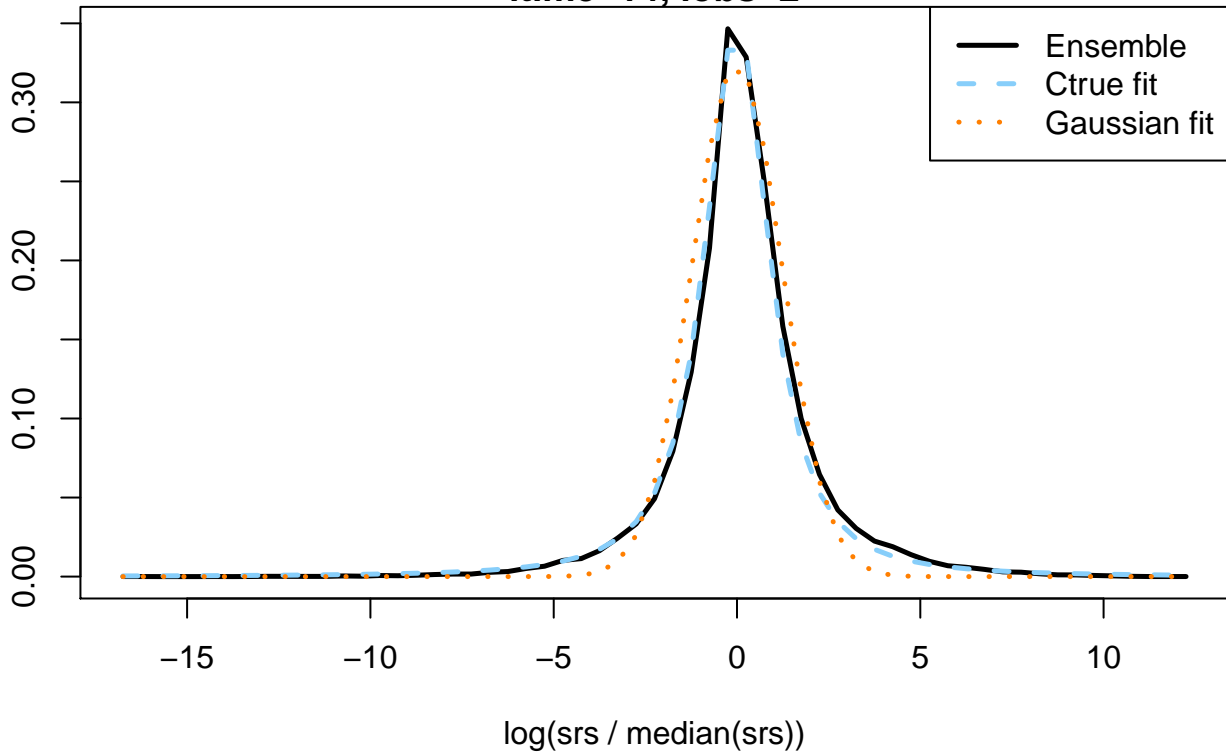

— Ensemble  
- - Ctrue fit  
... Gaussian fit

itime=14, iobs=3

density

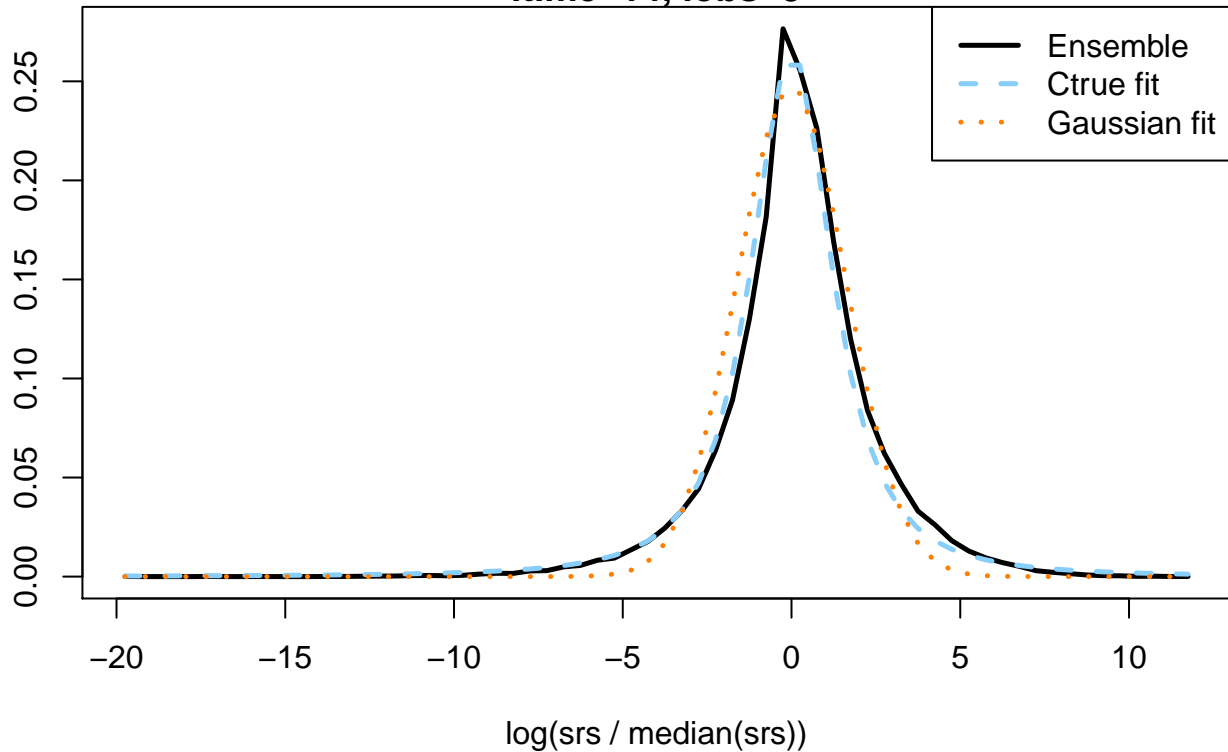

itime=14, iobs=4

density

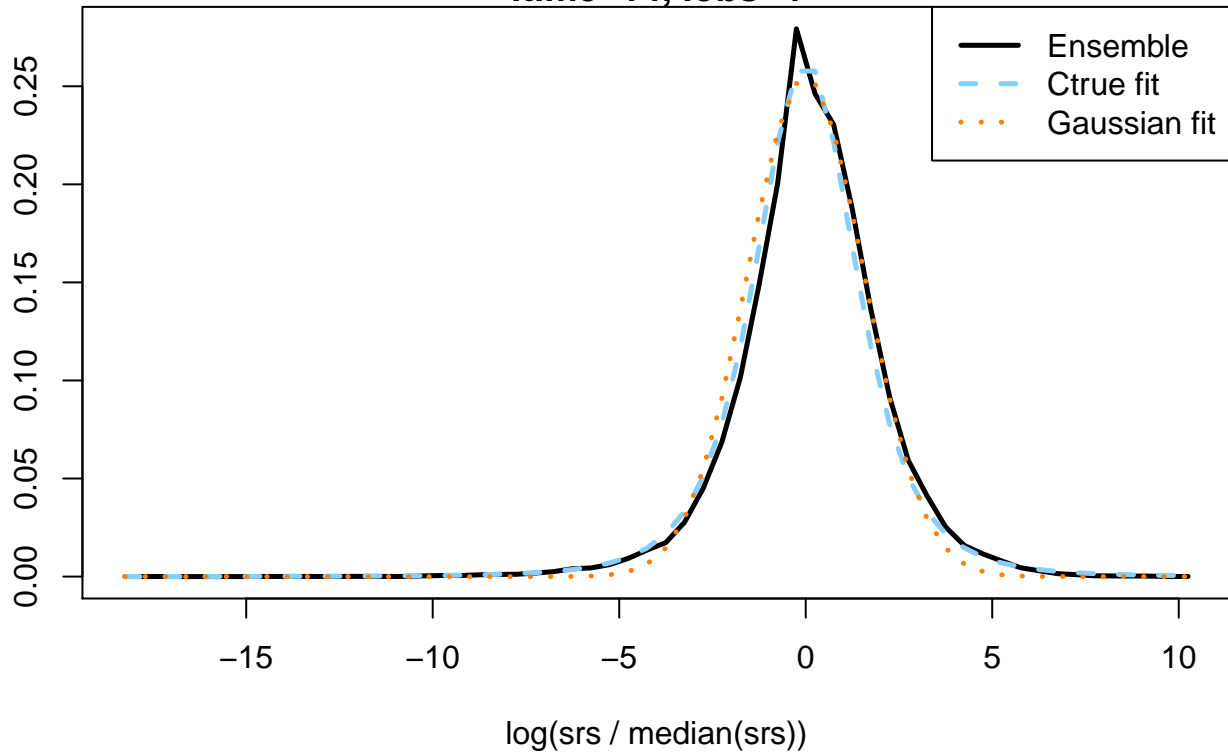



itime=14, iobs=5

density

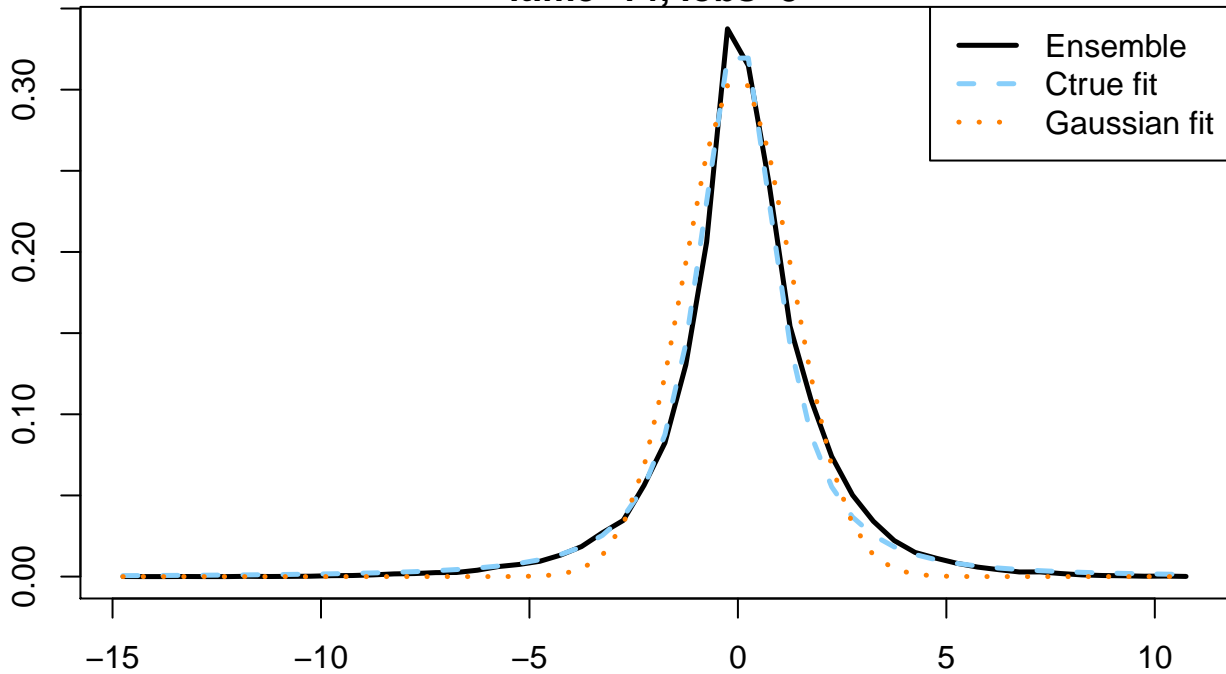

— Ensemble  
- - Ctrue fit  
... Gaussian fit

$\log(\text{srs} / \text{median}(\text{srs}))$

itime=14, iobs=6

density

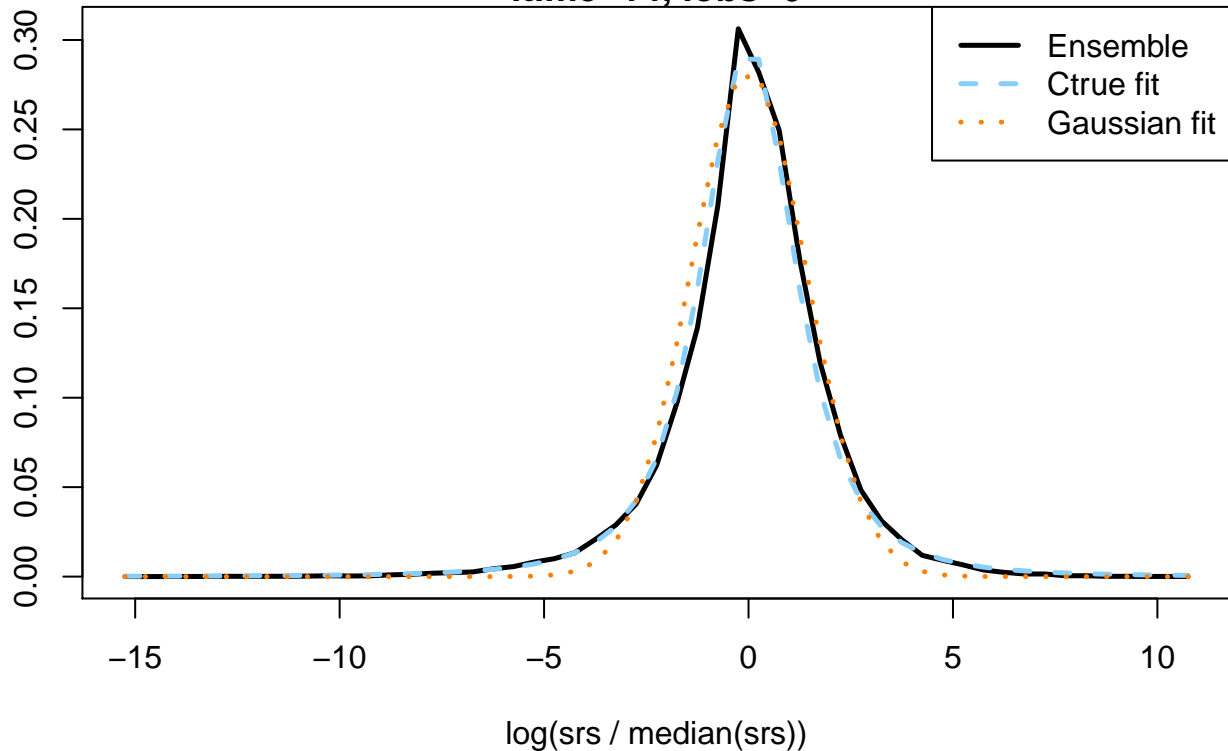

itime=14, iobs=7

density

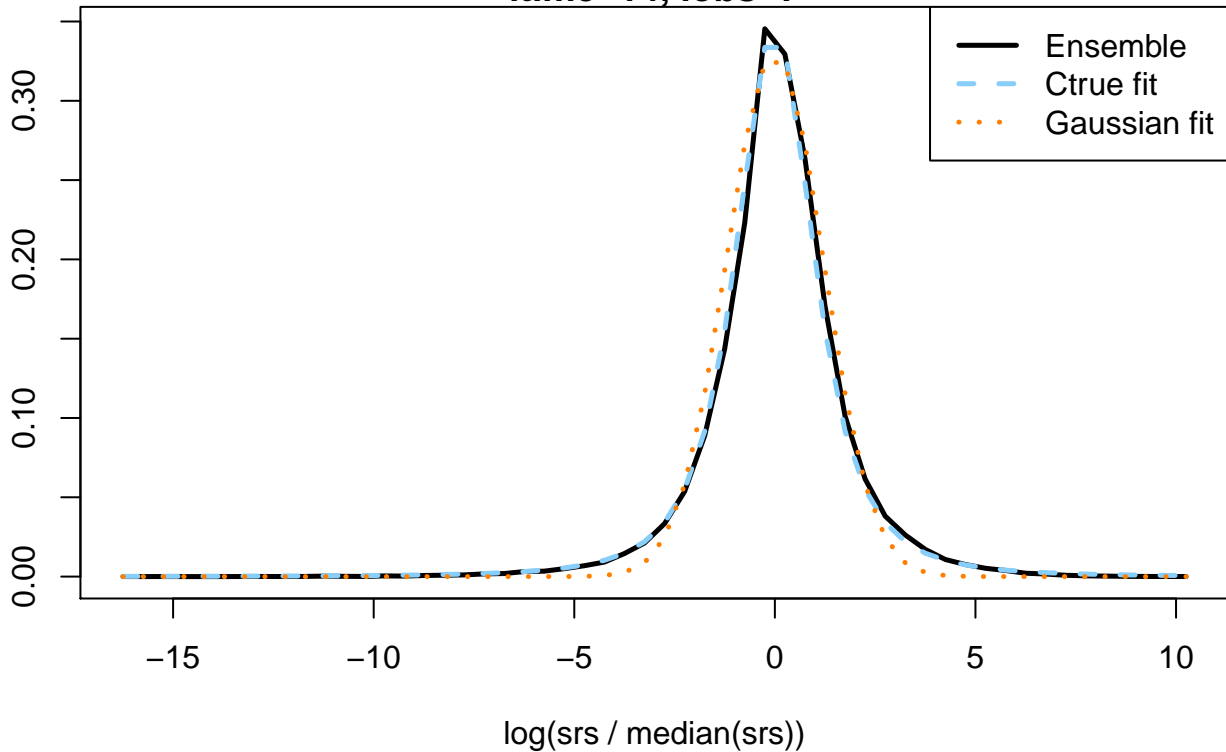

— Ensemble  
- - Ctrue fit  
... Gaussian fit

itime=14, iobs=8

density

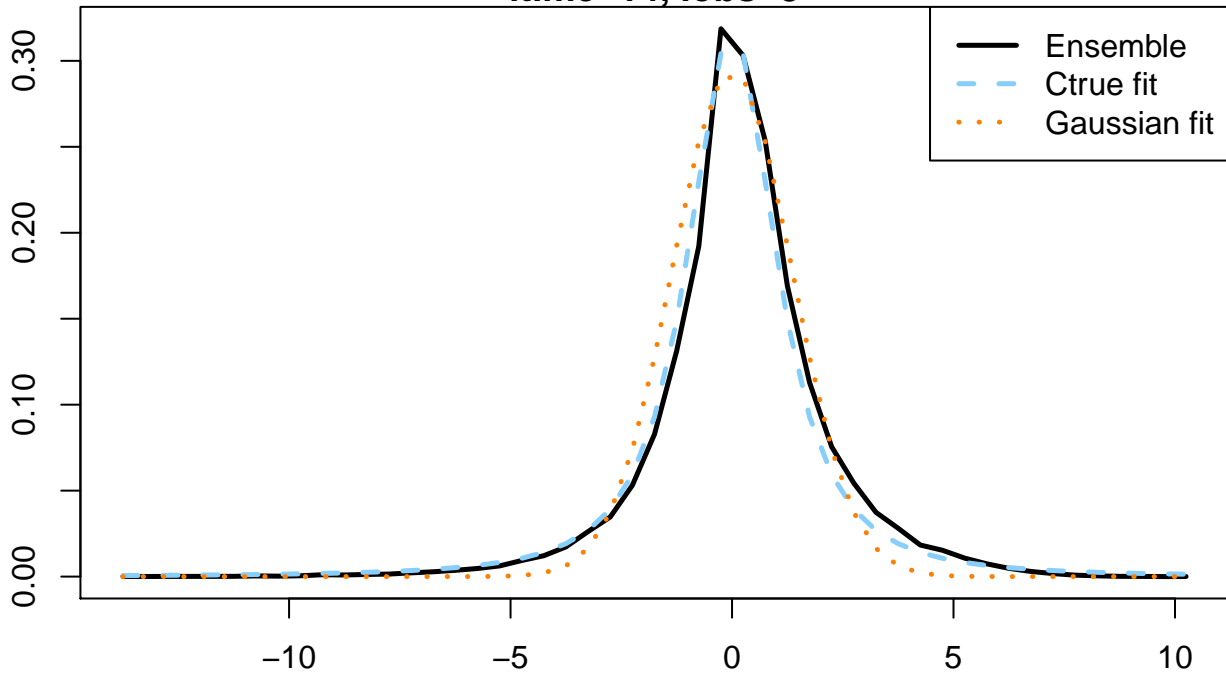

— Ensemble  
- - Ctrue fit  
... Gaussian fit

-10 -5 0 5 10

$\log(\text{srs} / \text{median}(\text{srs}))$

itime=14, iobs=9

density

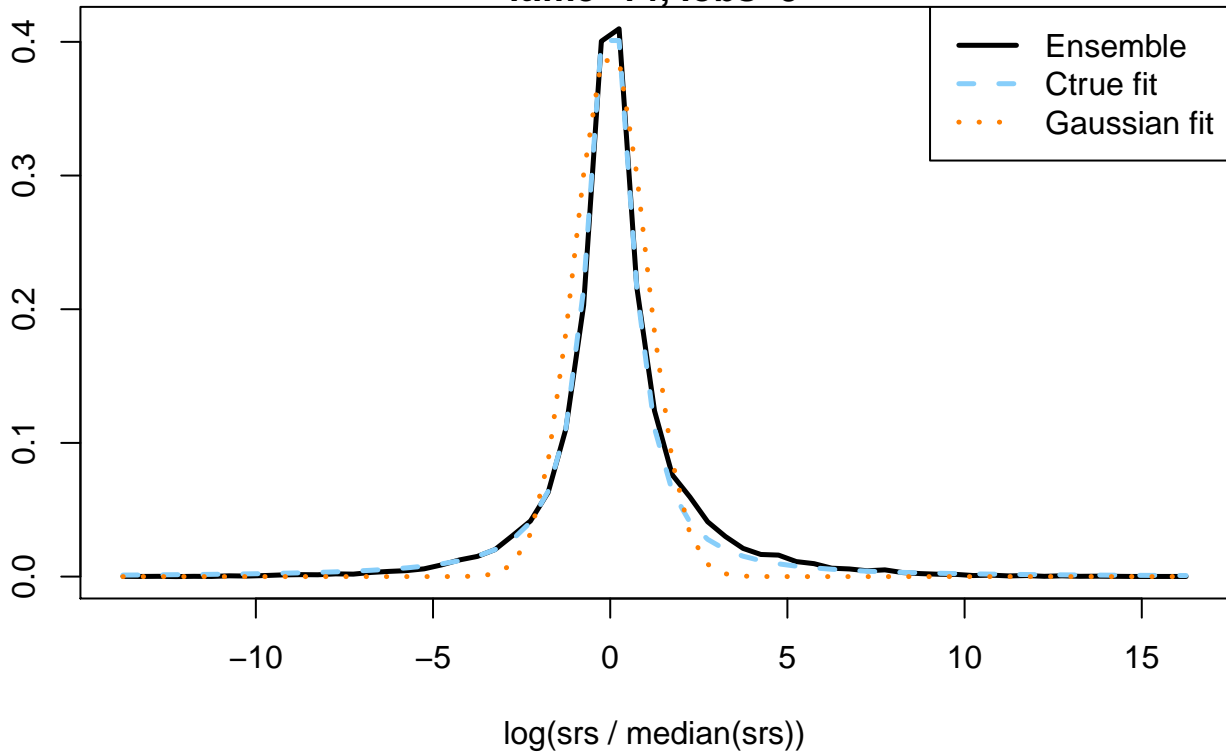

itime=15, iobs=10

density

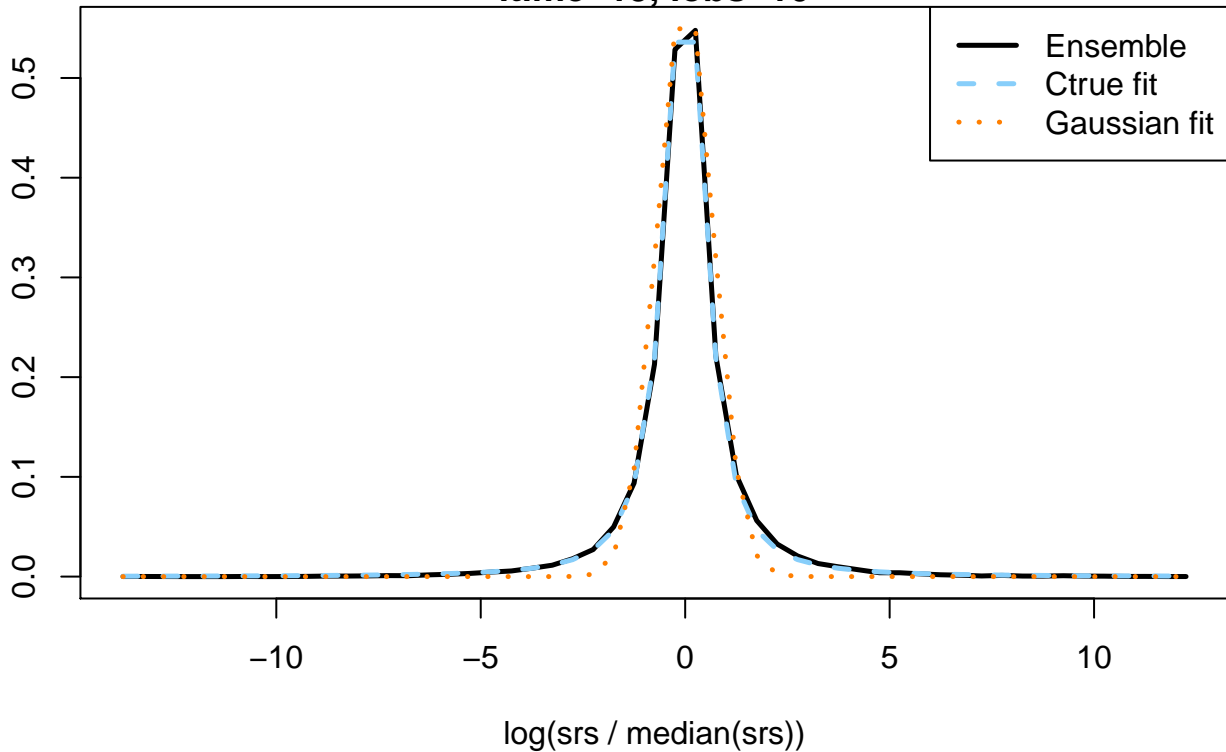

— Ensemble  
- - Ctrue fit  
... Gaussian fit

itime=15, iobs=11

density

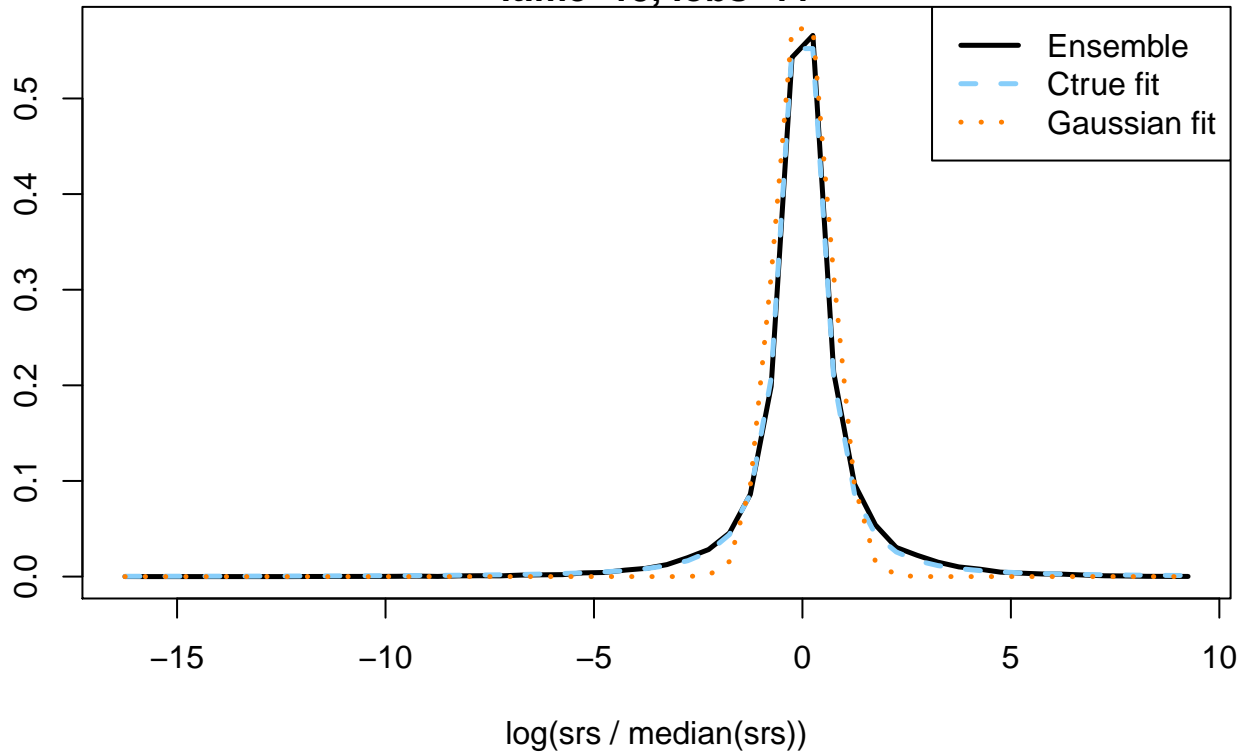

itime=15, iobs=12

density

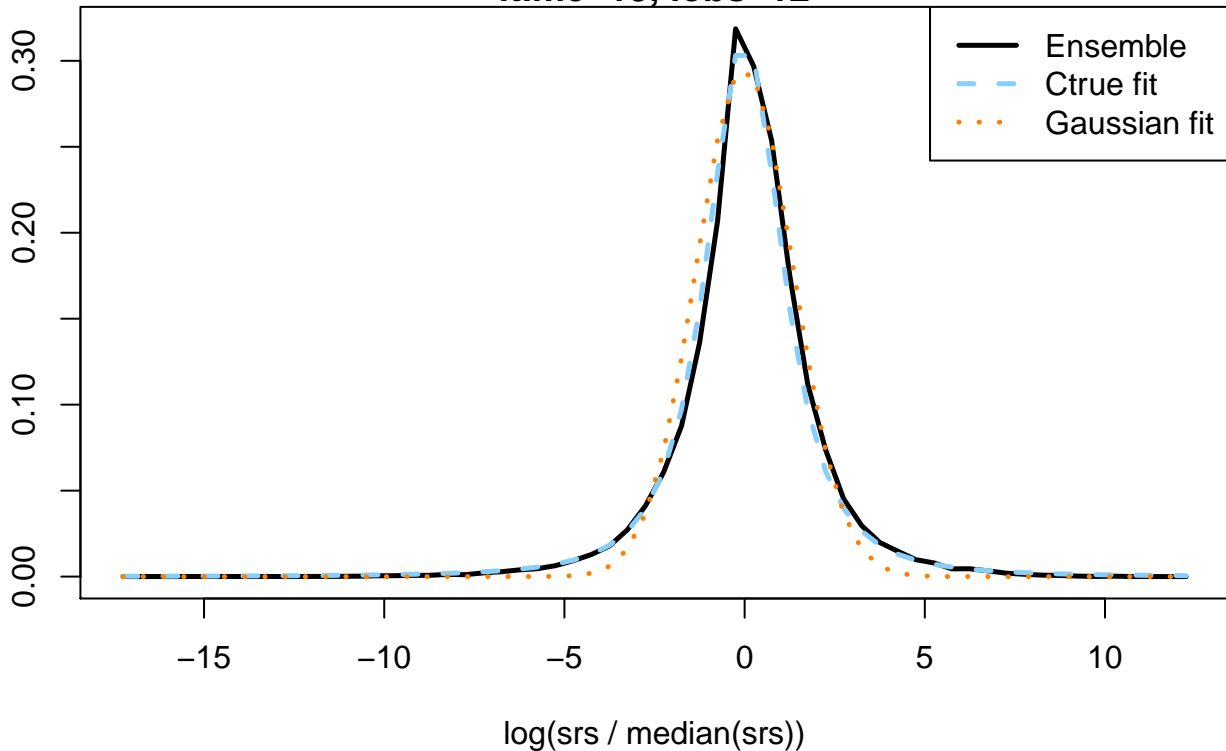



itime=15, iobs=1

density

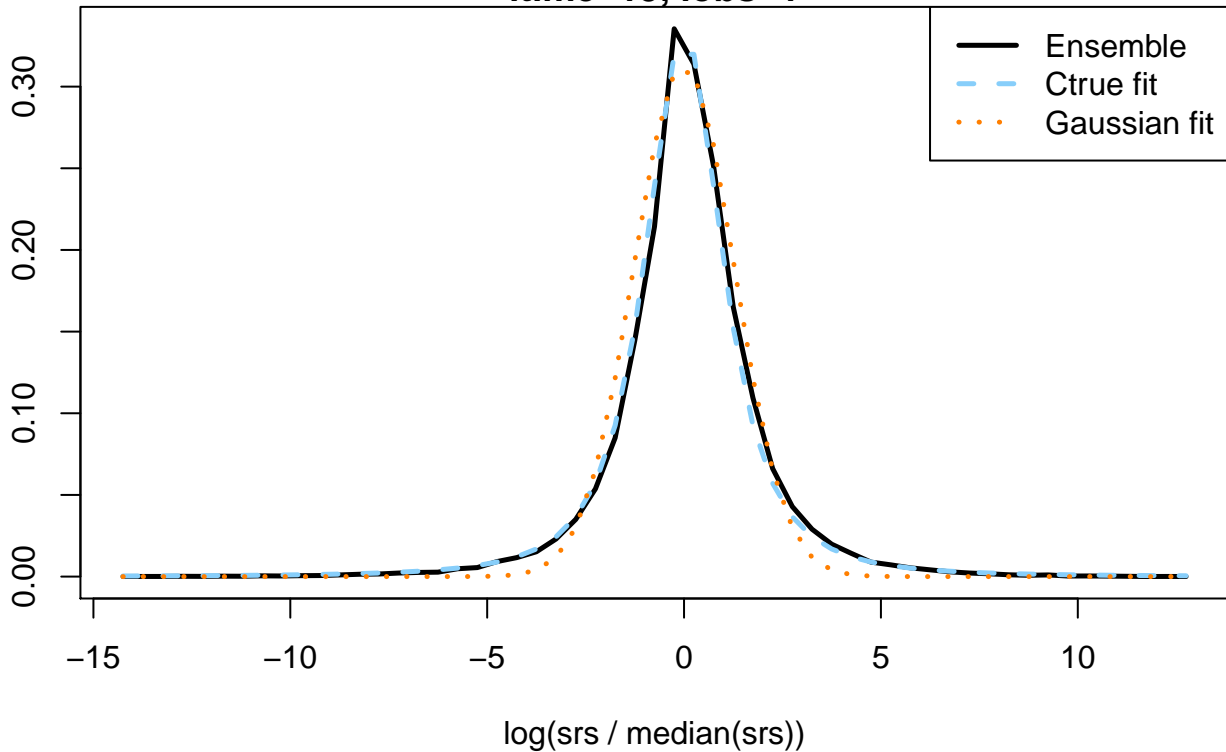

— Ensemble  
- - Ctrue fit  
... Gaussian fit

itime=15, iobs=2

density

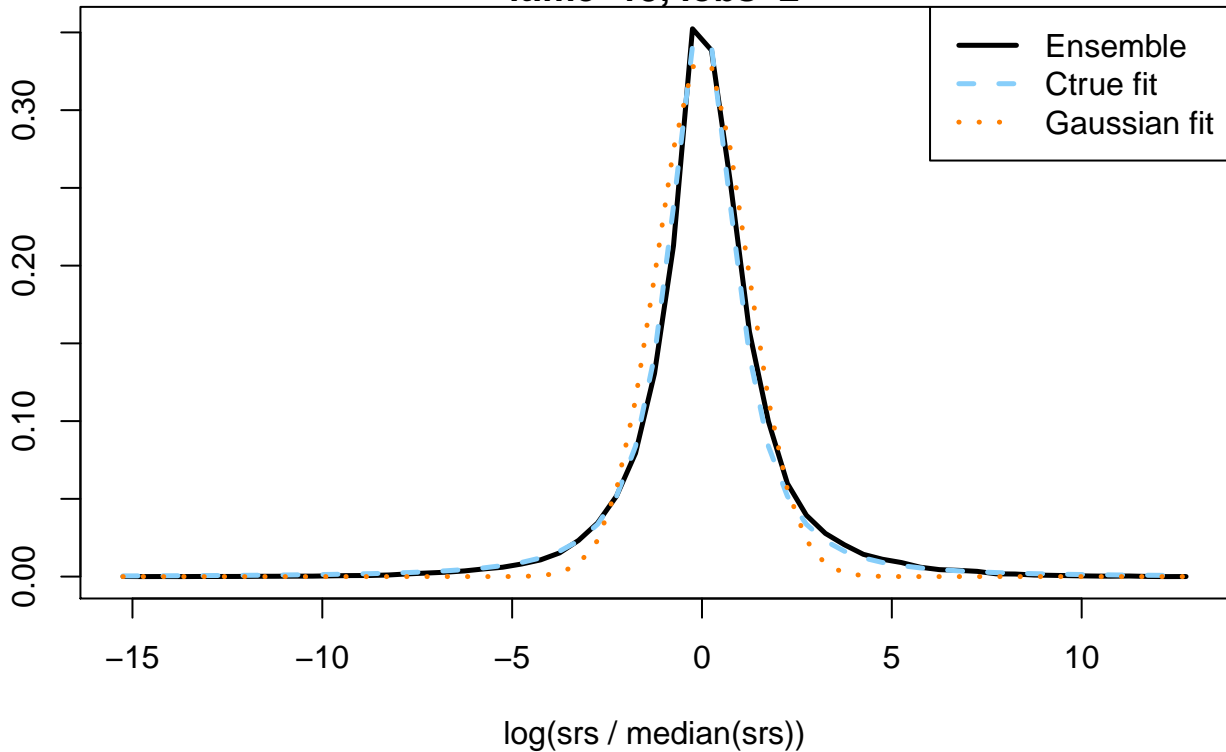

itime=15, iobs=3

density

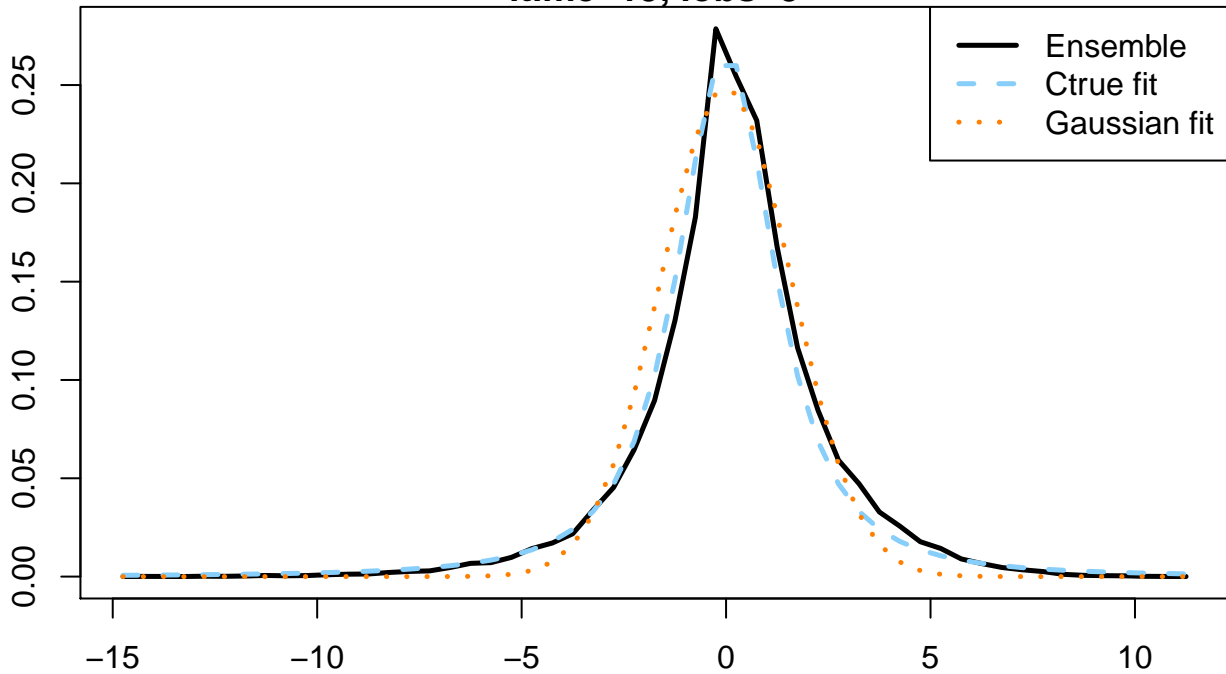

log(srs / median(srs))

itime=15, iobs=4

density

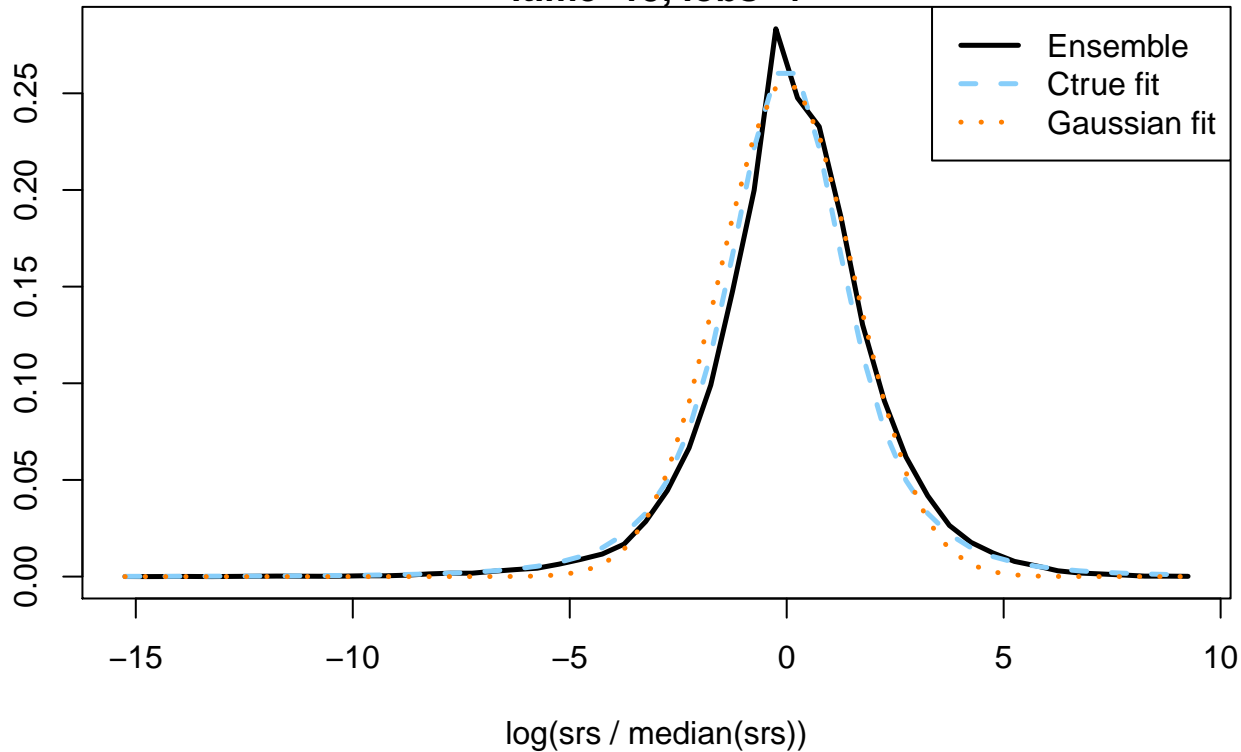

itime=15, iobs=5

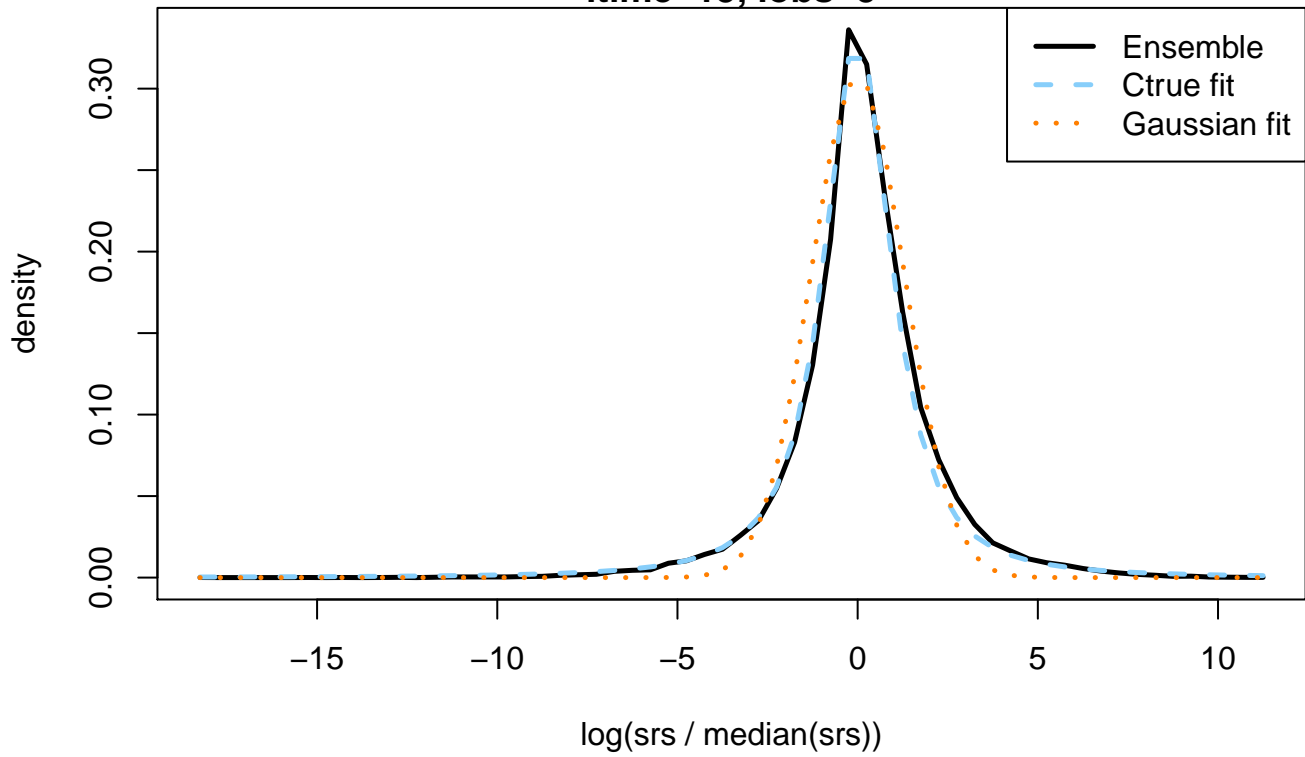

itime=15, iobs=6

density

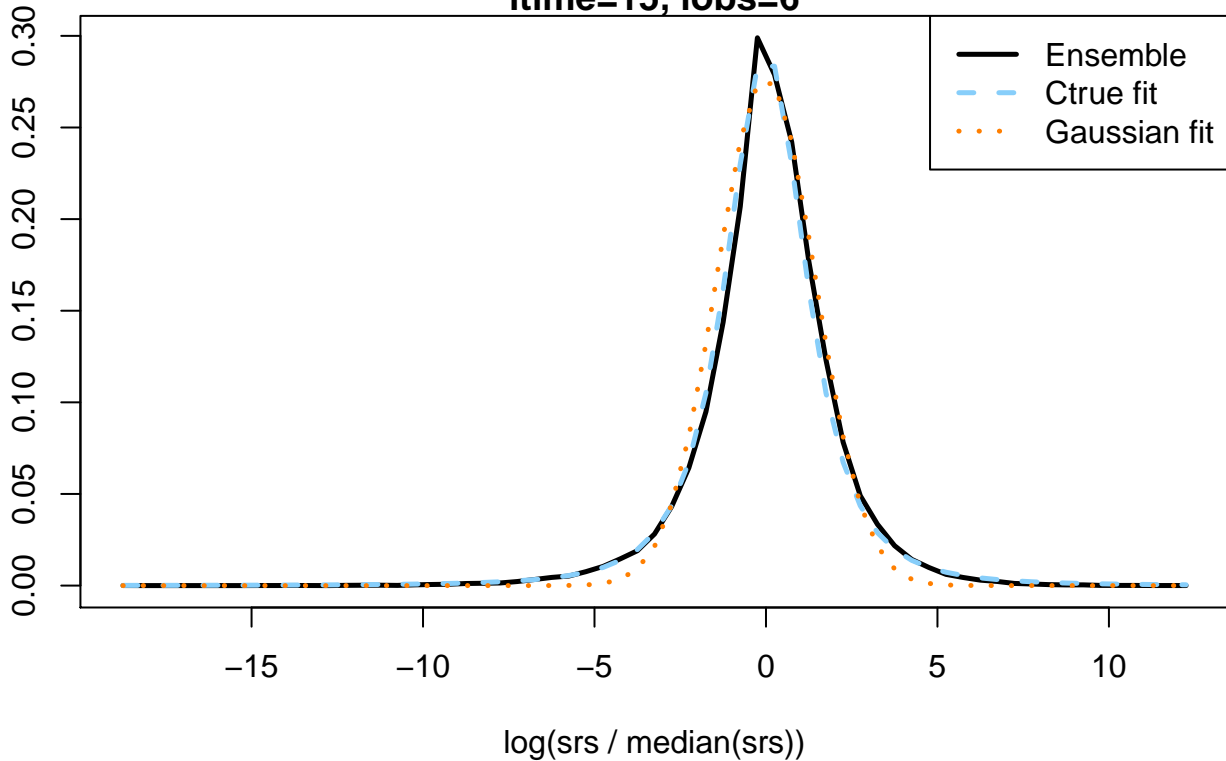

itime=15, iobs=7

density

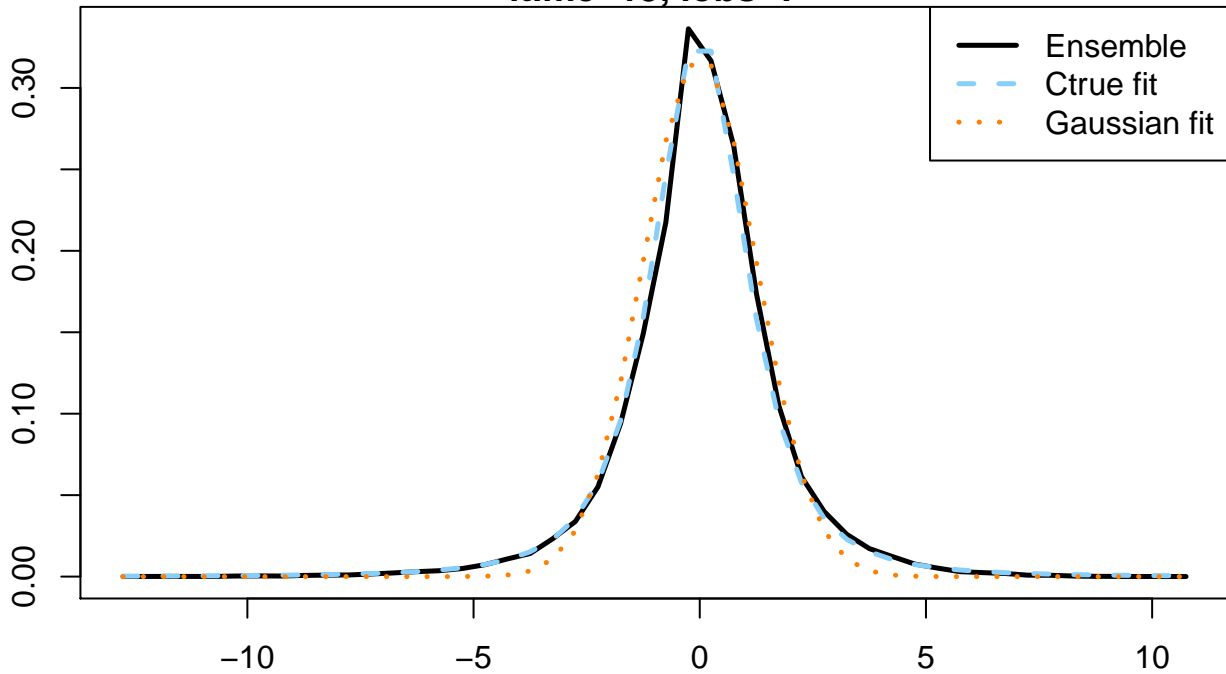

— Ensemble  
- - Ctrue fit  
... Gaussian fit

$\log(\text{srs} / \text{median}(\text{srs}))$

itime=15, iobs=8

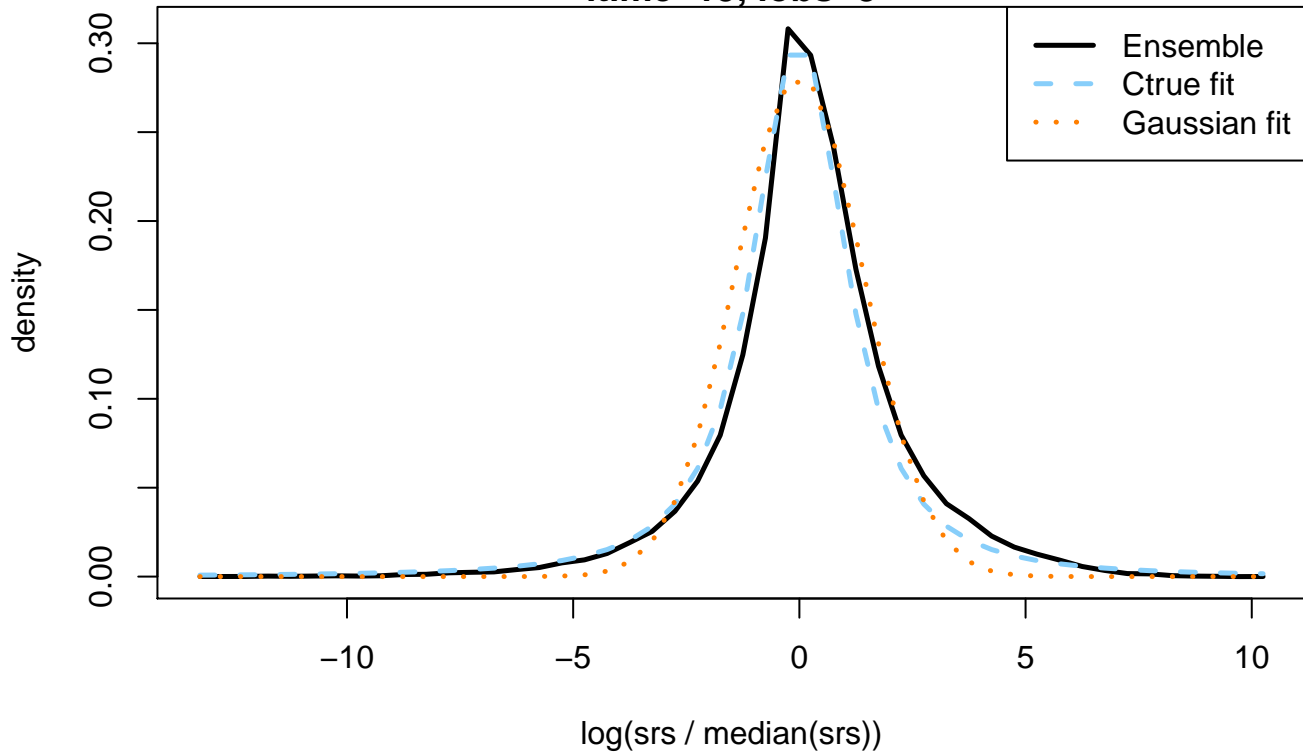



itime=15, iobs=9

density

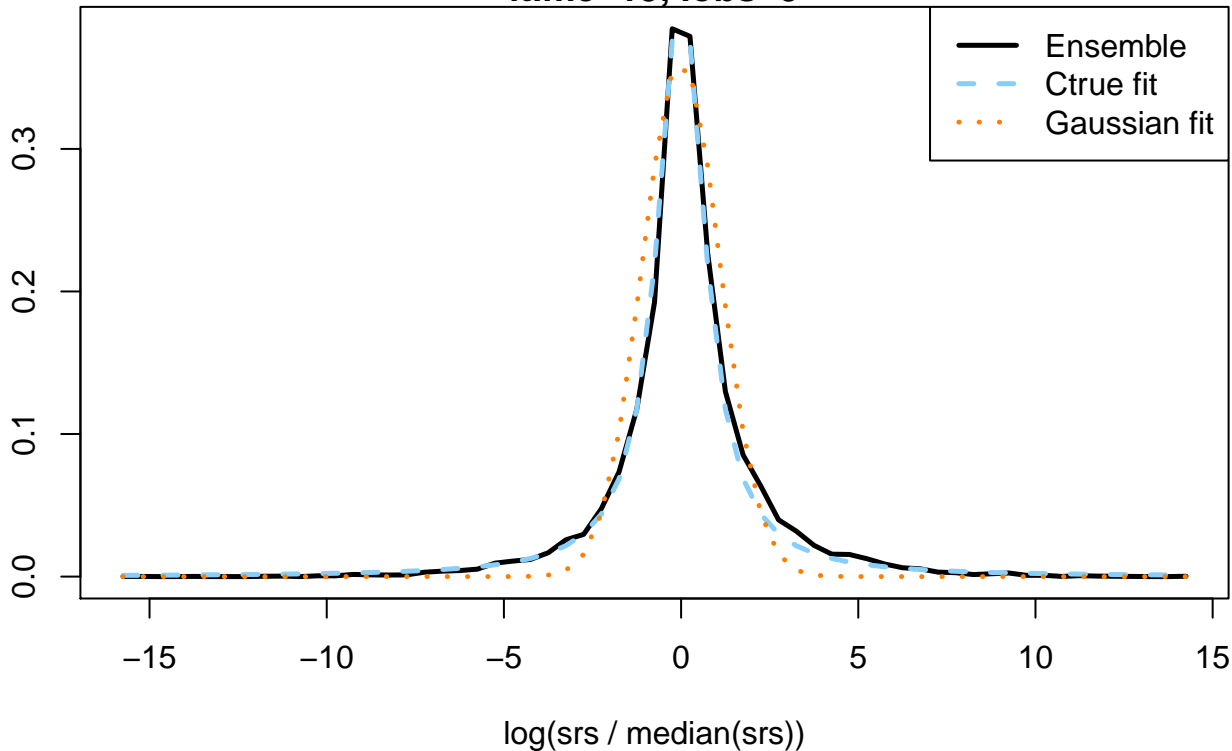

itime=16, iobs=10

density

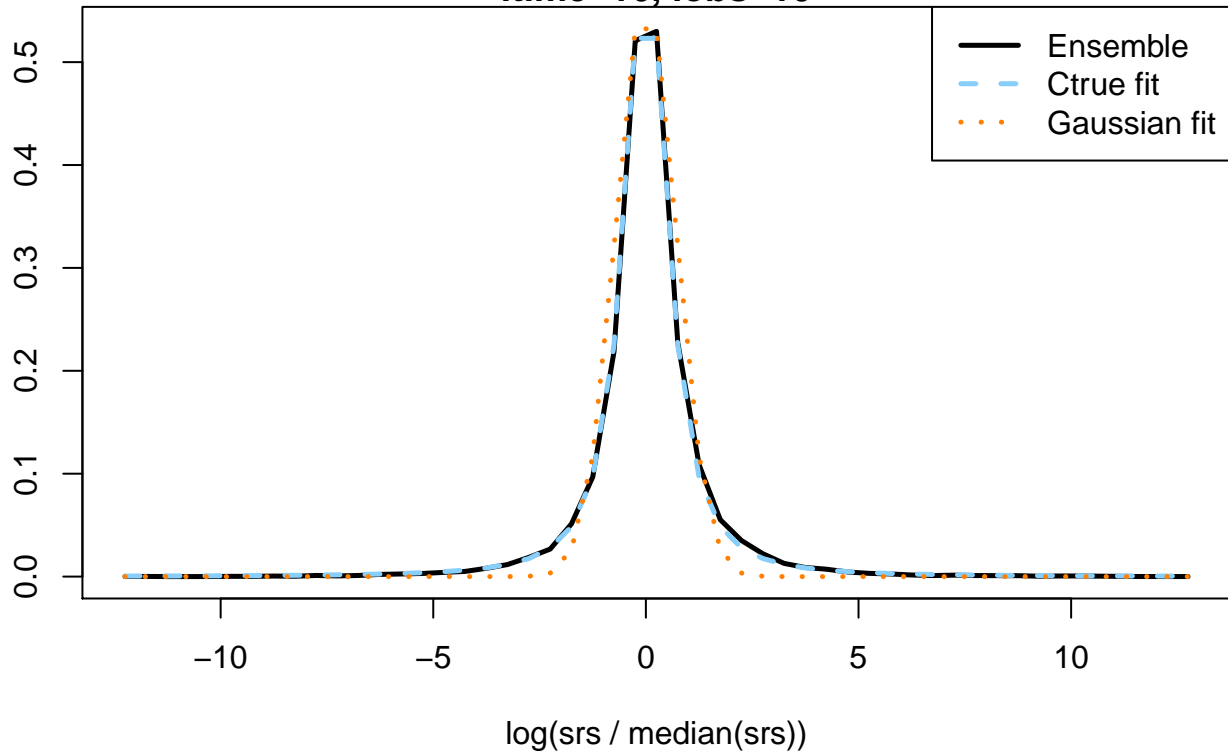

— Ensemble  
- - Ctrue fit  
... Gaussian fit

itime=16, iobs=11

density

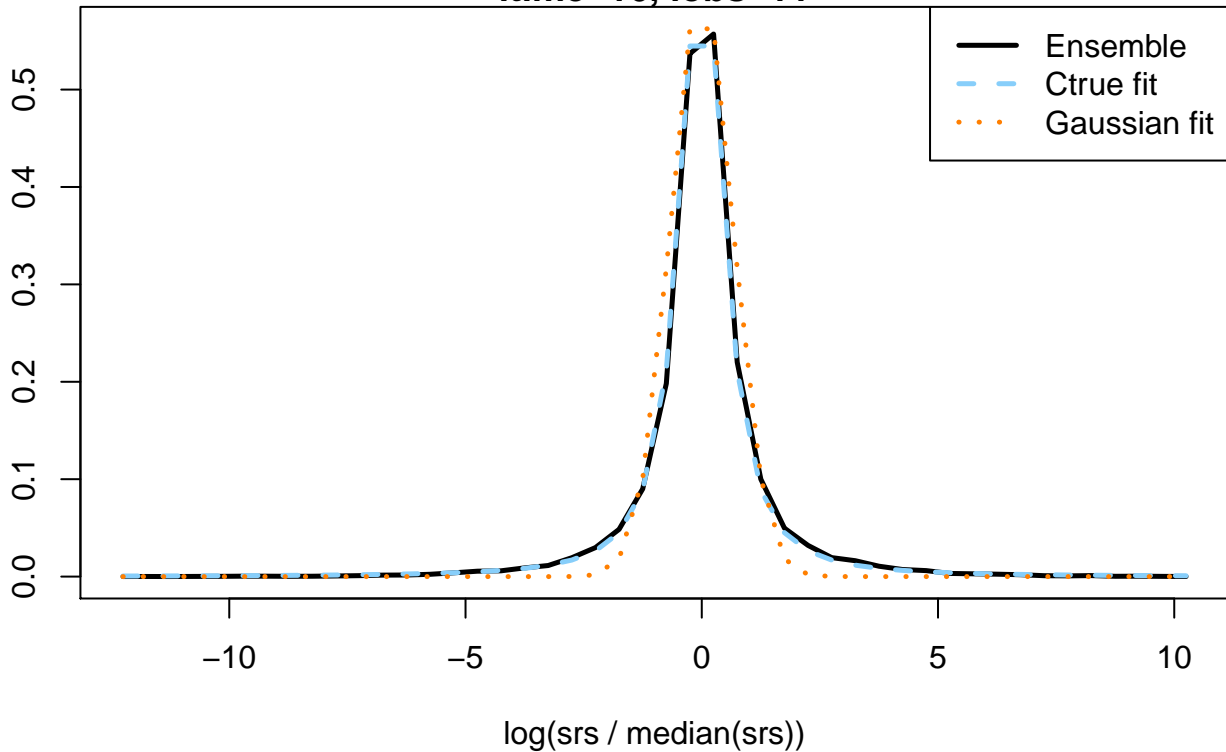

— Ensemble  
- - Ctrue fit  
... Gaussian fit

itime=16, iobs=12

density

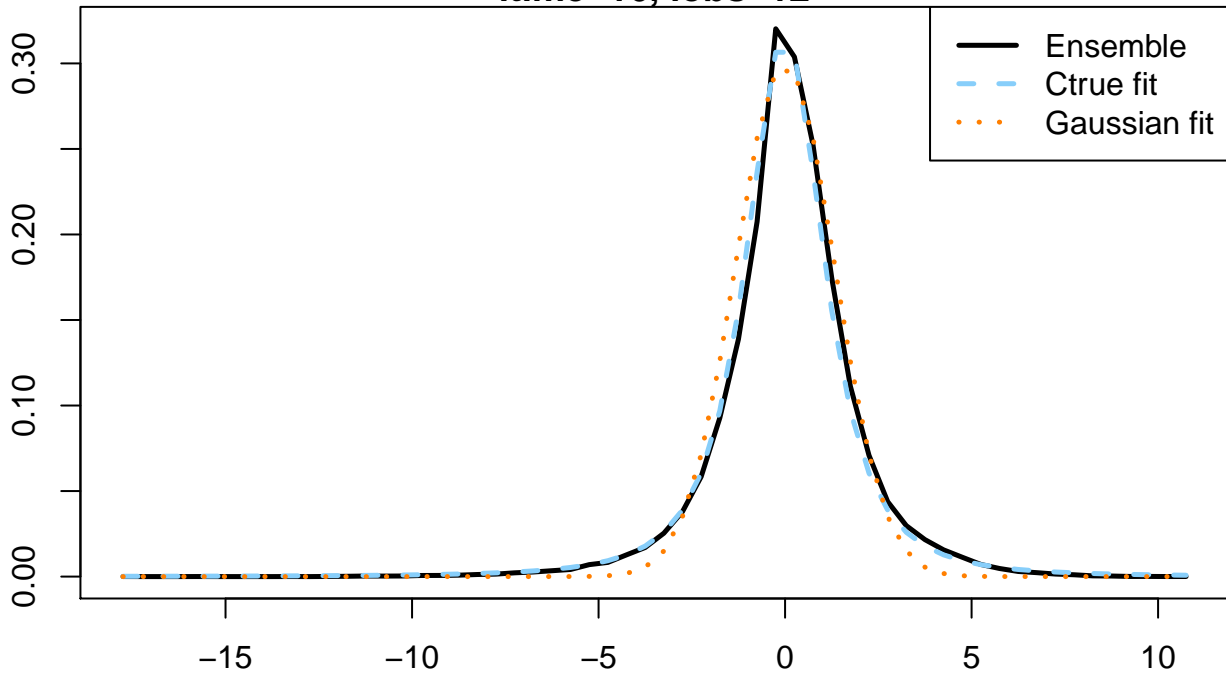

log(srs / median(srs))

itime=16, iobs=1

density

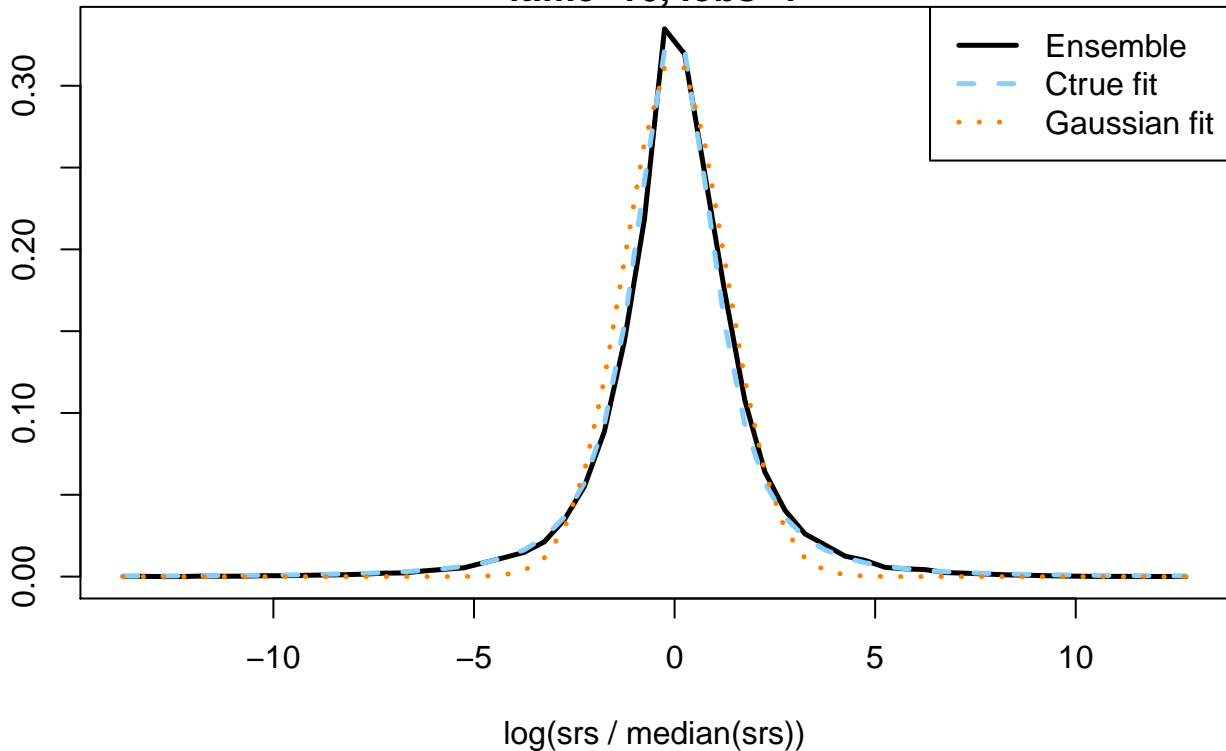

itime=16, iobs=2

density

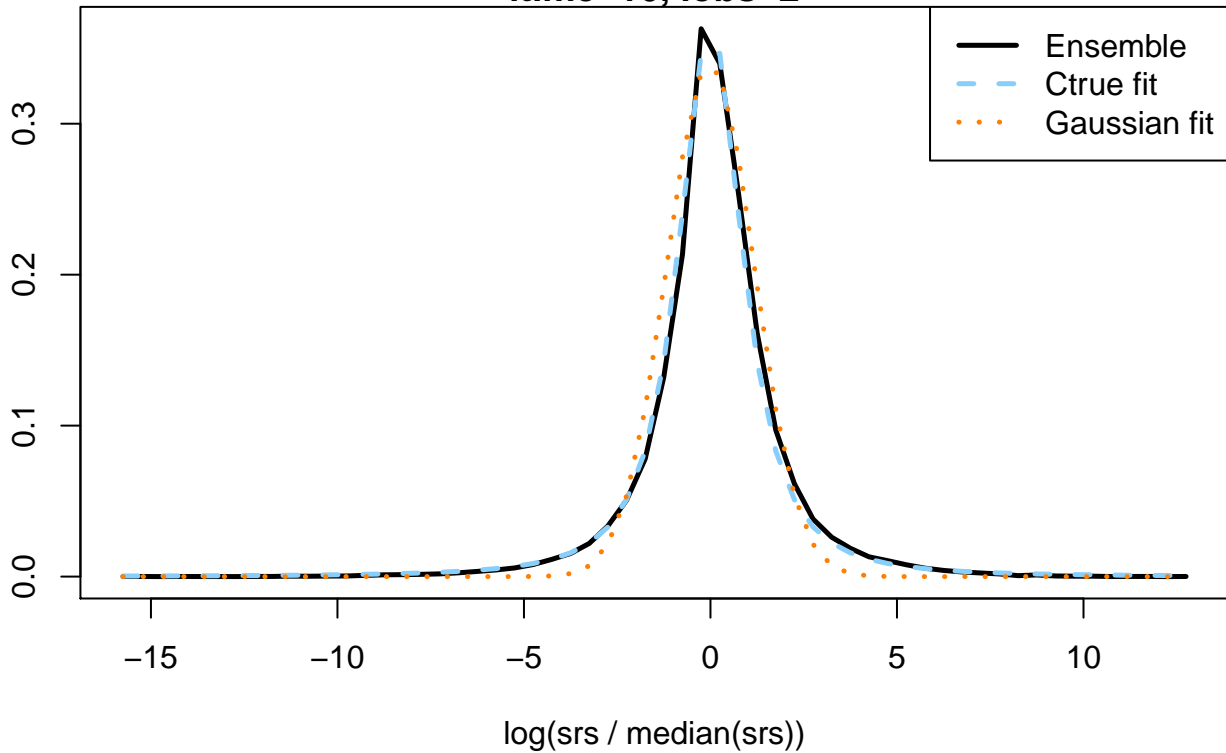

itime=16, iobs=3

density

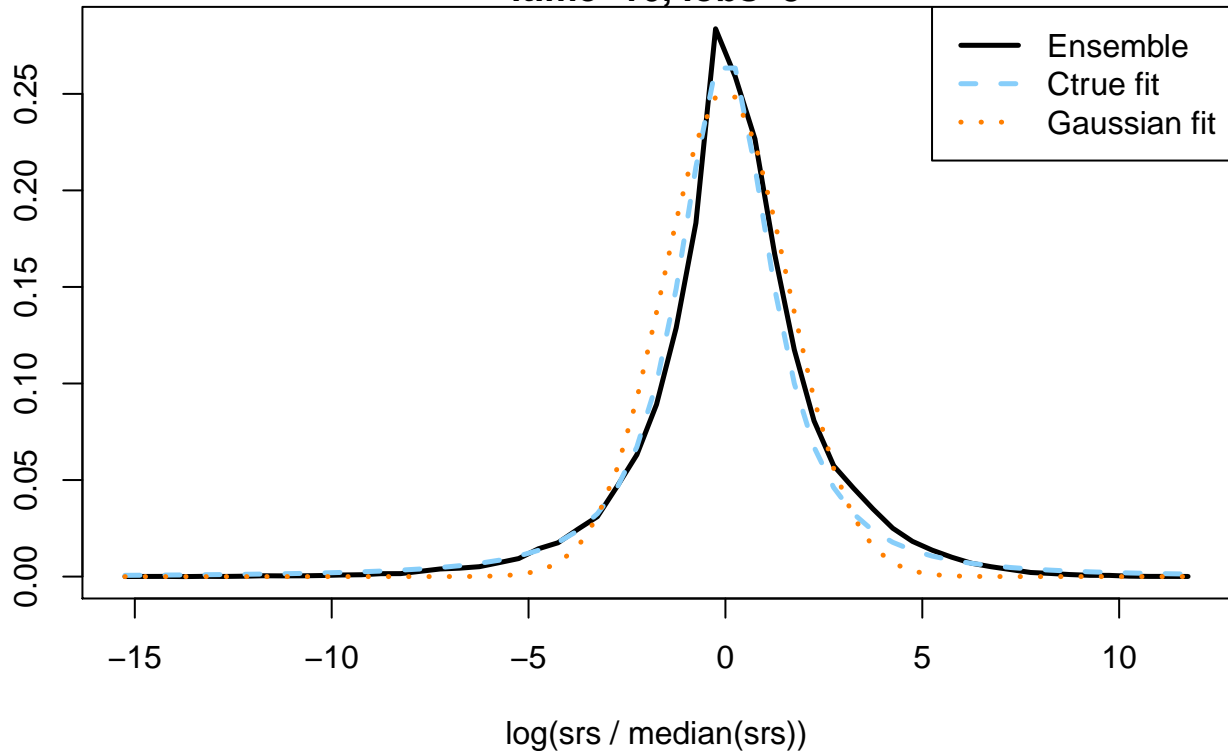

itime=16, iobs=4

density

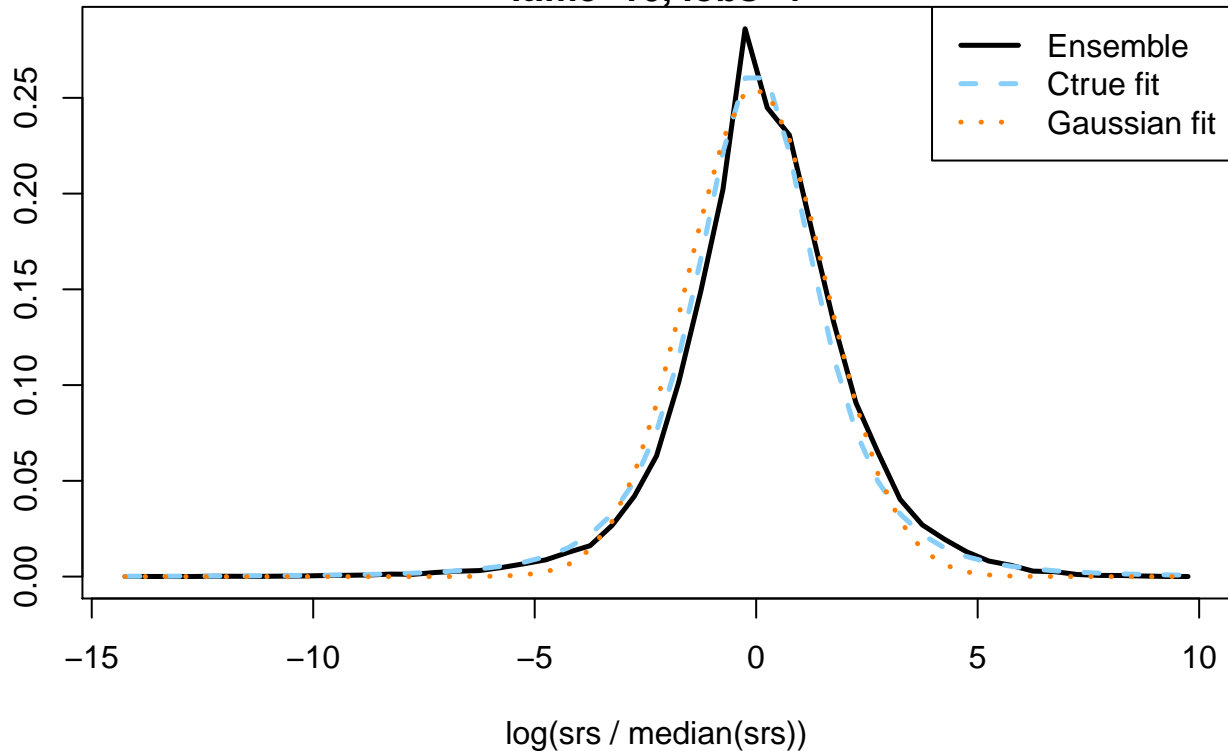



itime=16, iobs=5

density

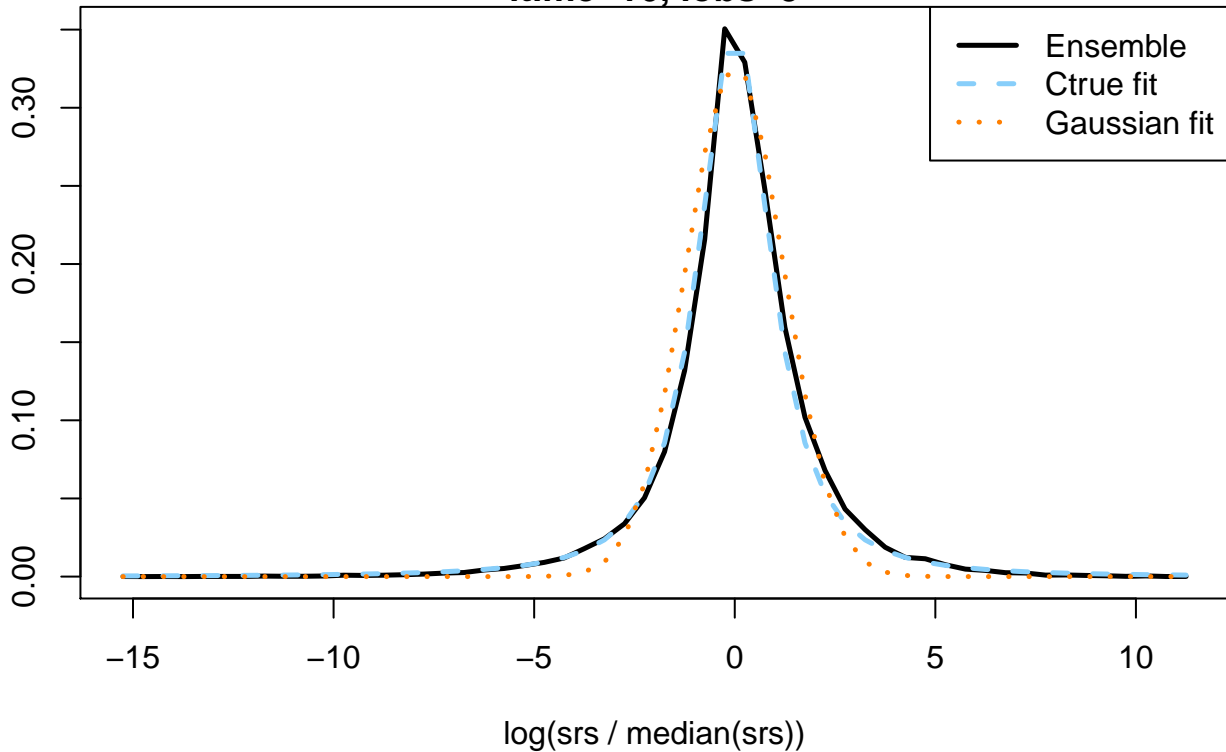

— Ensemble  
- - Ctrue fit  
... Gaussian fit

itime=16, iobs=6

density

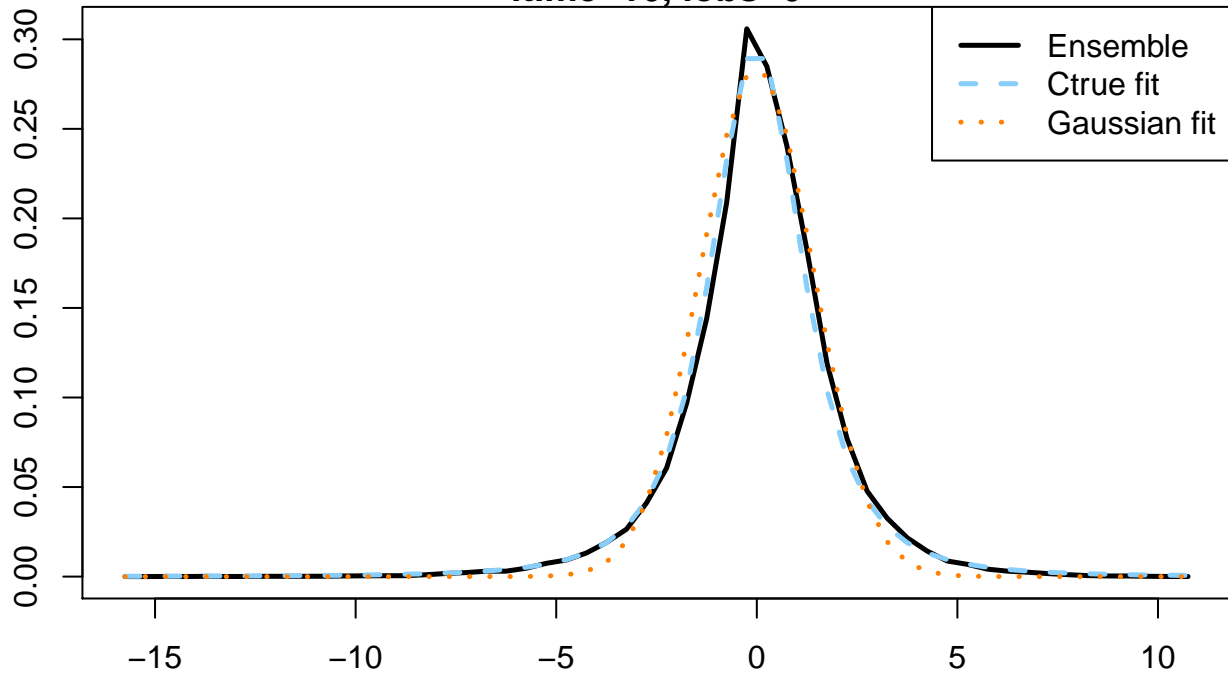

— Ensemble  
- - Ctrue fit  
... Gaussian fit

$\log(\text{srs} / \text{median}(\text{srs}))$

itime=16, iobs=7

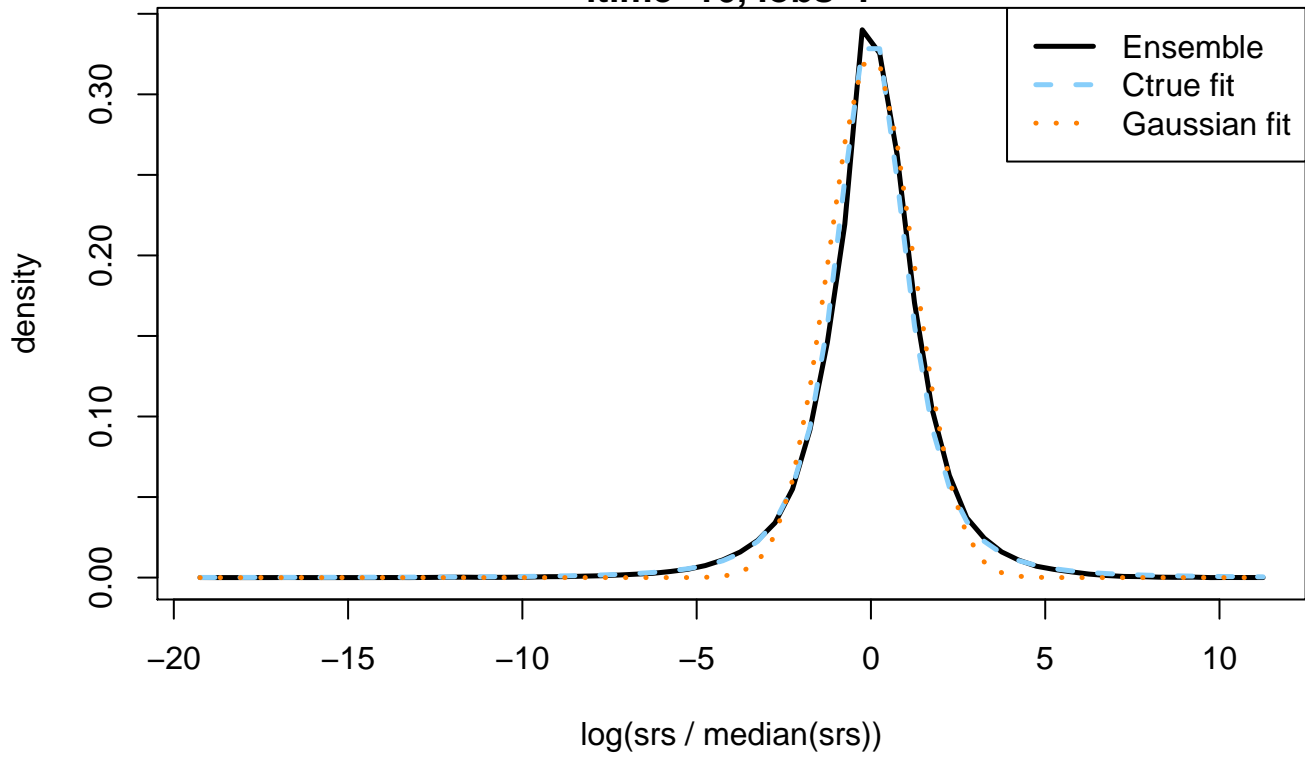

itime=16, iobs=8

density

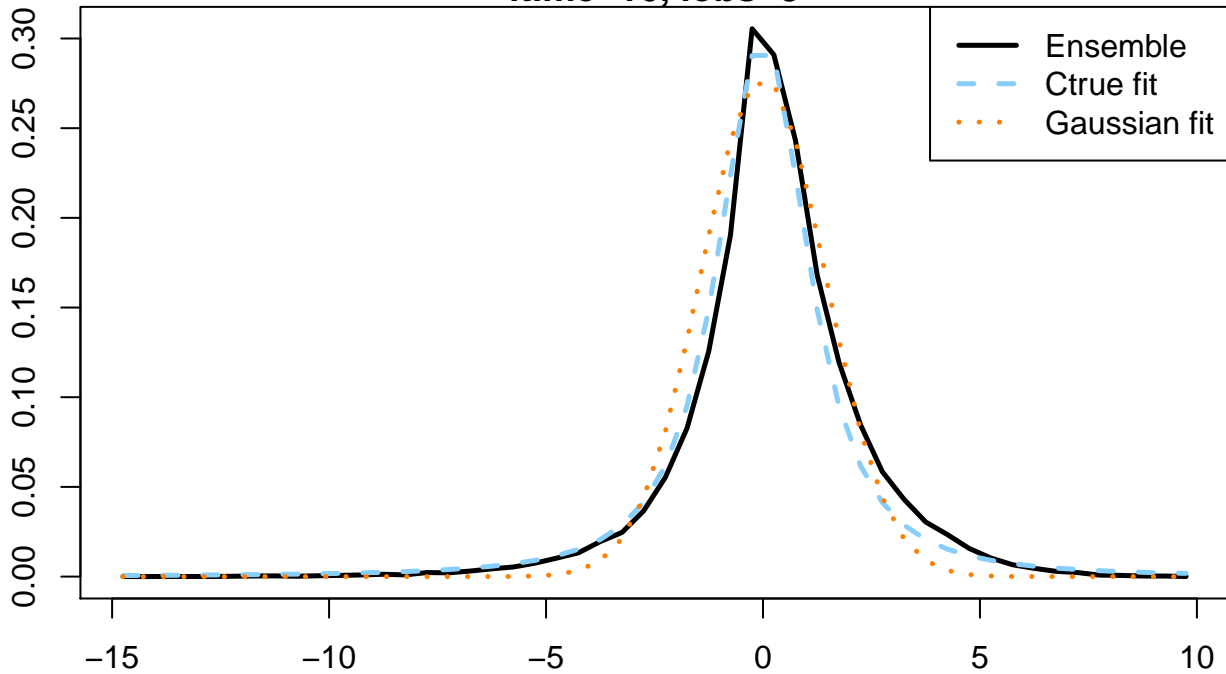

log(srs / median(srs))

itime=16, iobs=9

density

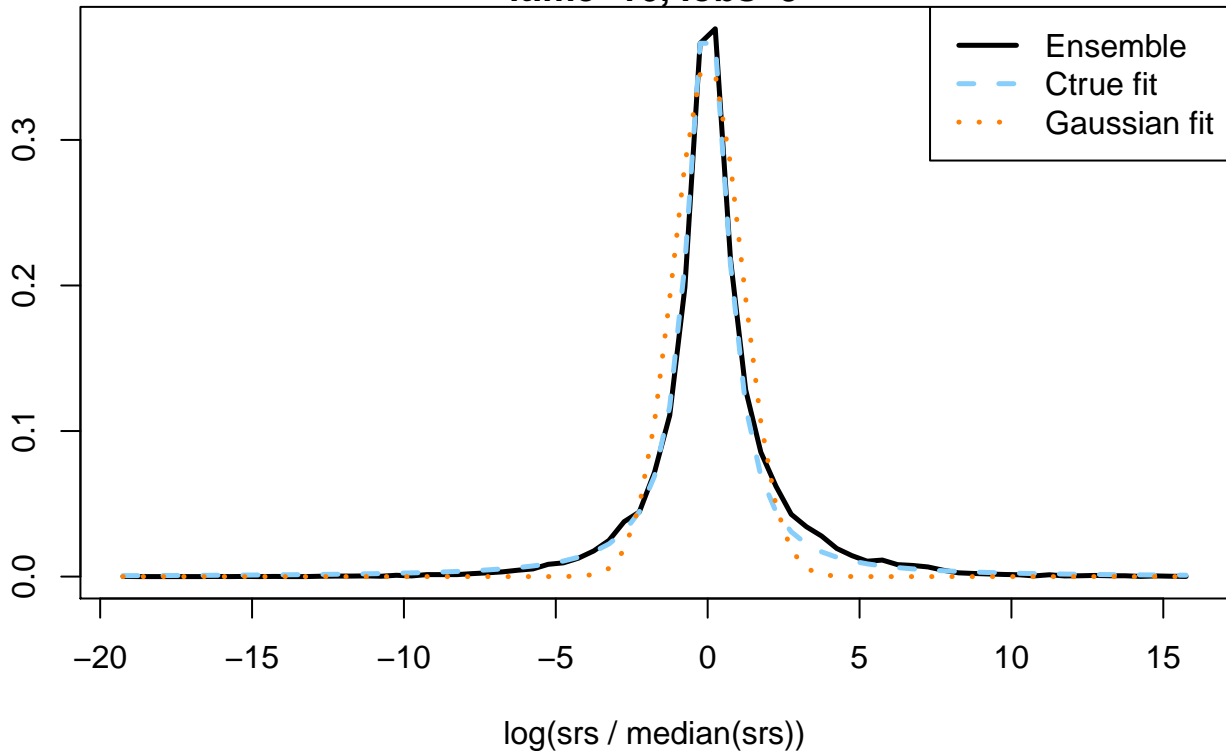

itime=17, iobs=10

density

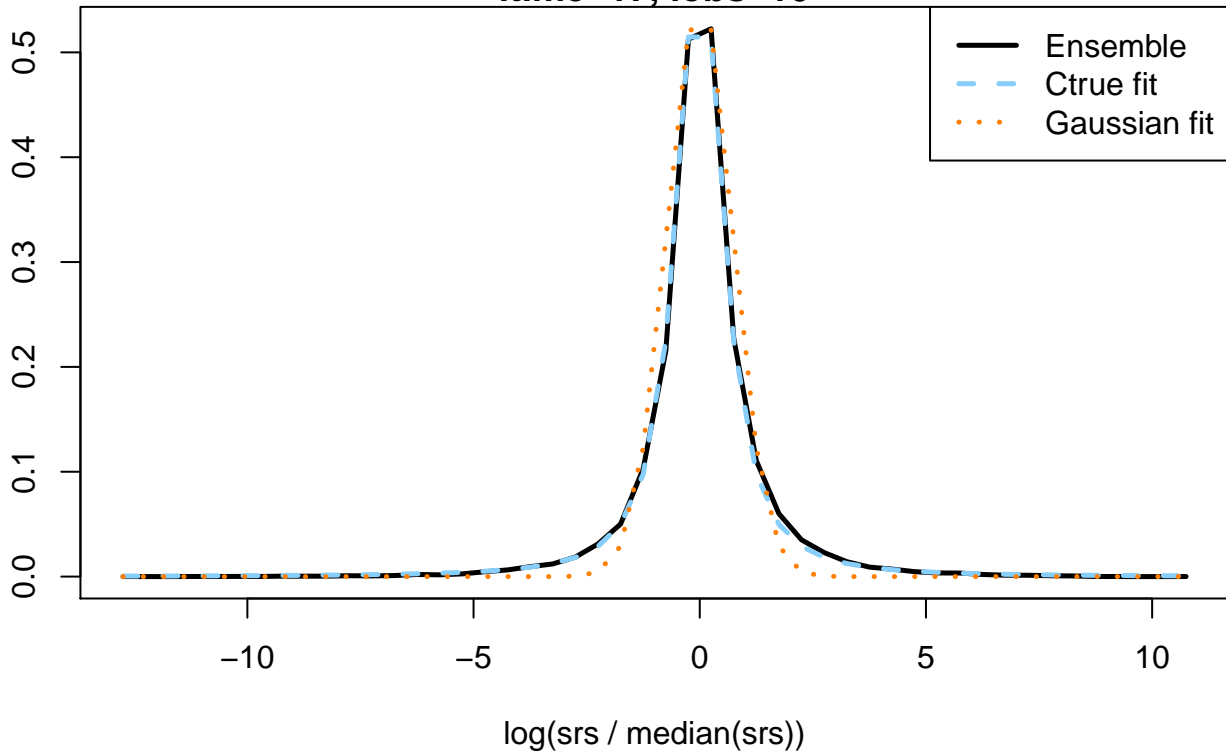

— Ensemble  
- - Ctrue fit  
... Gaussian fit

itime=17, iobs=11

density

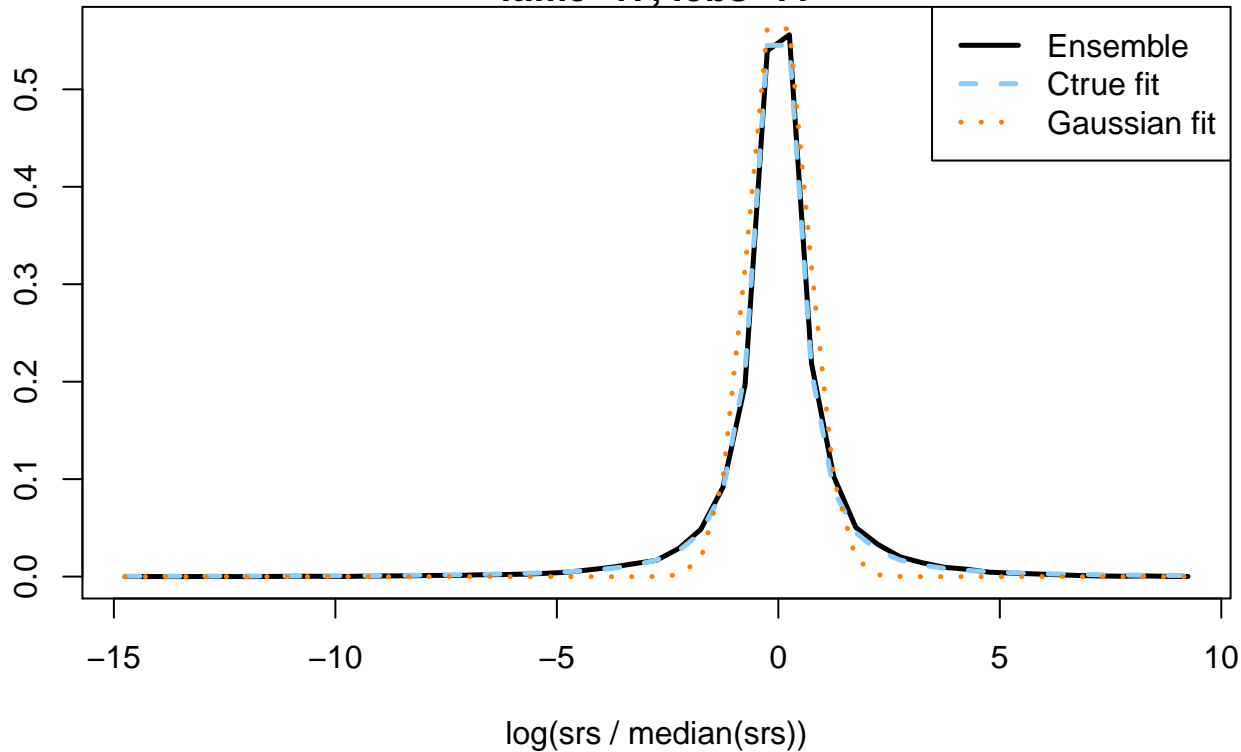

itime=17, iobs=12

density

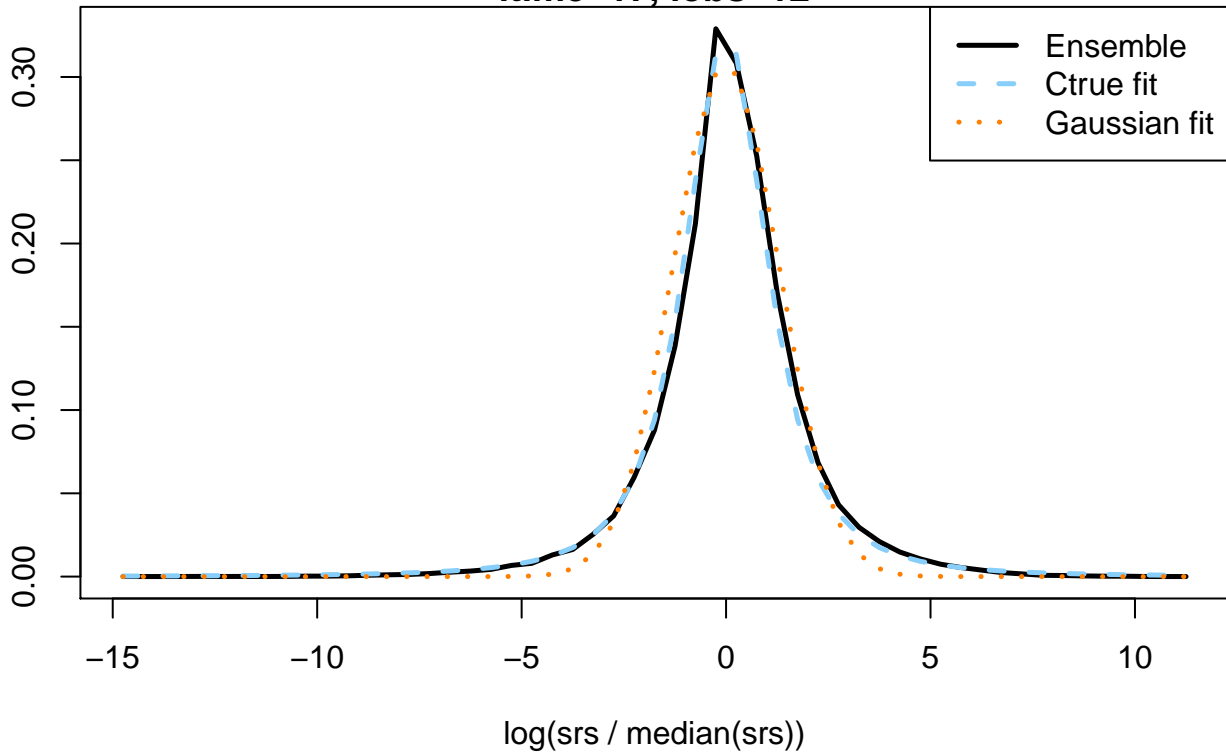

— Ensemble  
- - Ctrue fit  
... Gaussian fit

$\log(\text{srs} / \text{median}(\text{srs}))$



itime=17, iobs=1

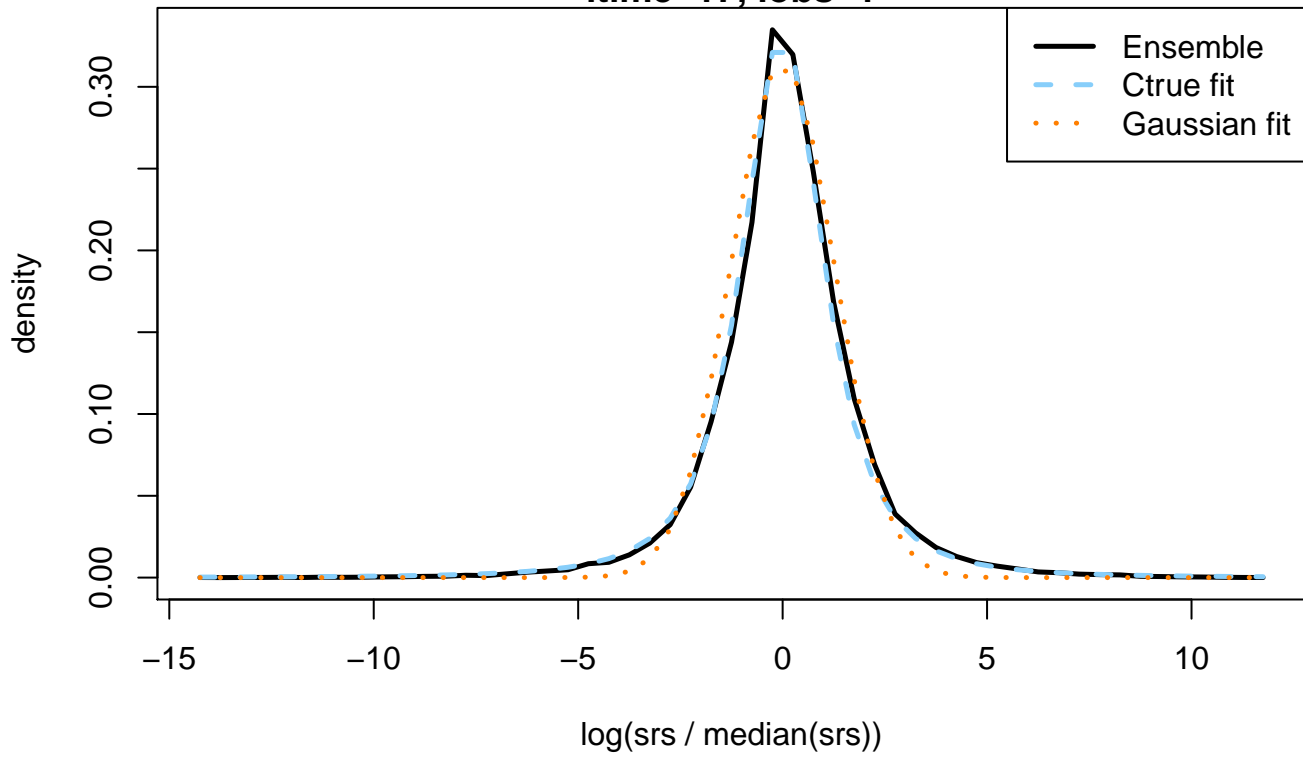

itime=17, iobs=2

density

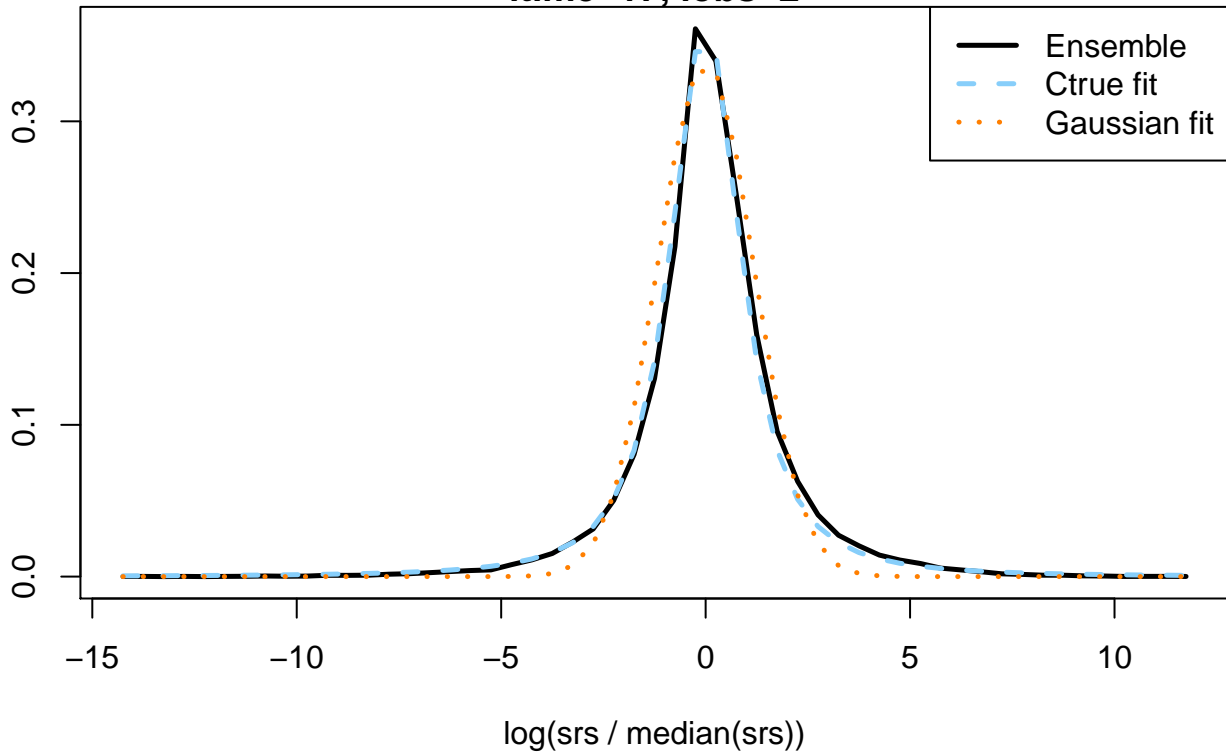

— Ensemble  
- - Ctrue fit  
... Gaussian fit

itime=17, iobs=3

density

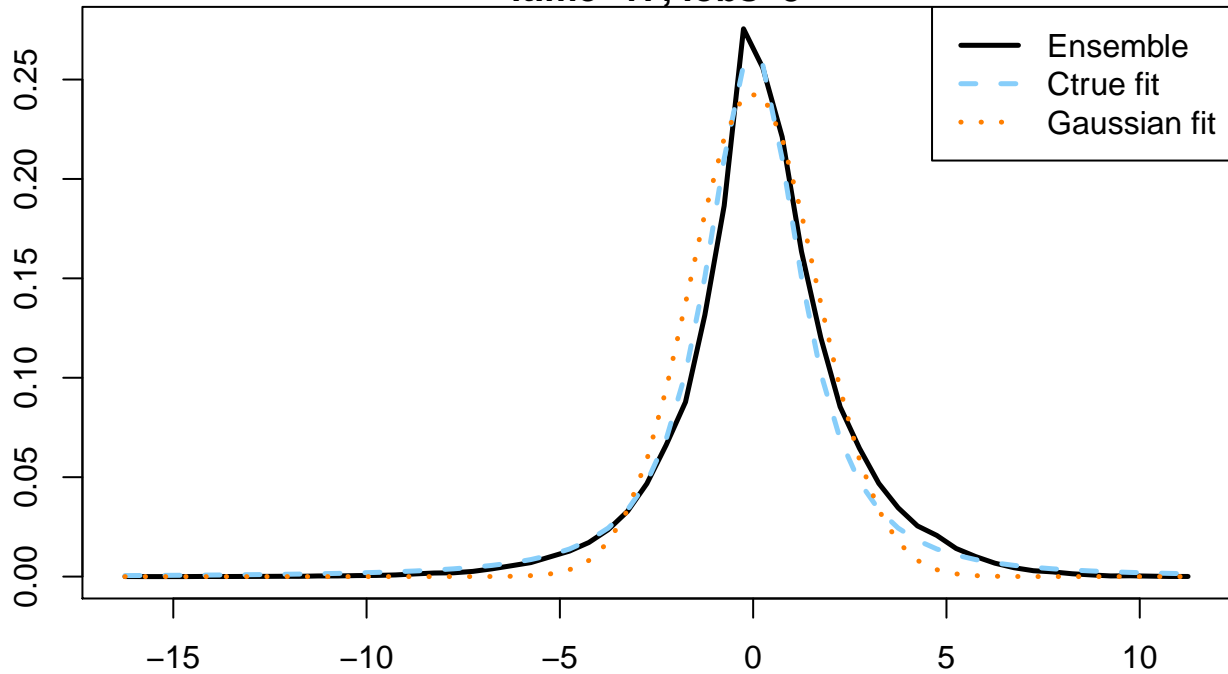

log(srs / median(srs))

itime=17, iobs=4

density

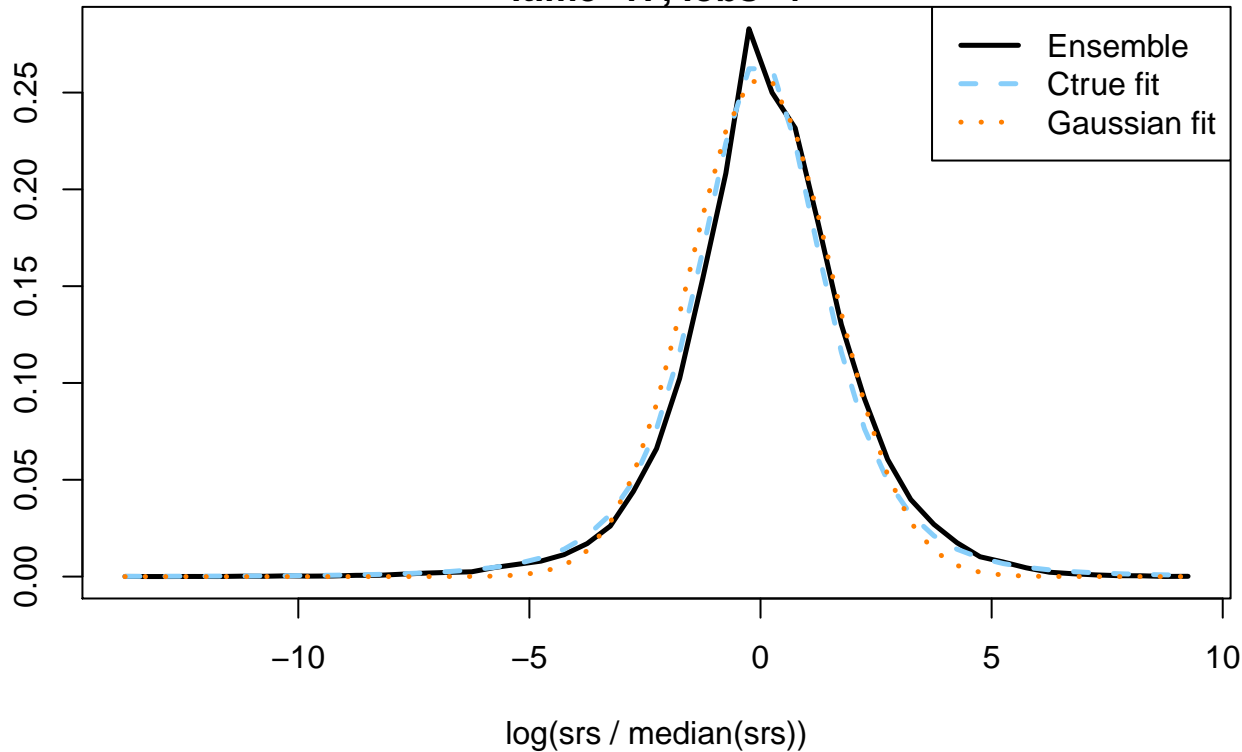

itime=17, iobs=5

density

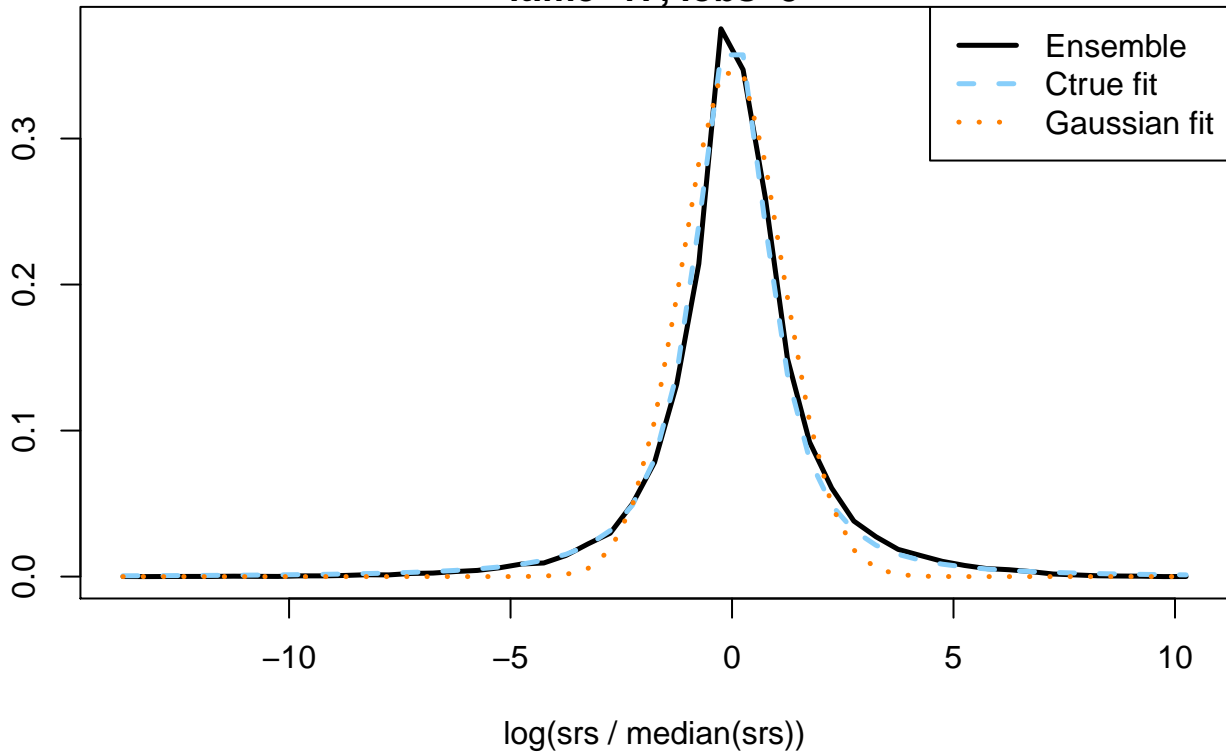

itime=17, iobs=6

density

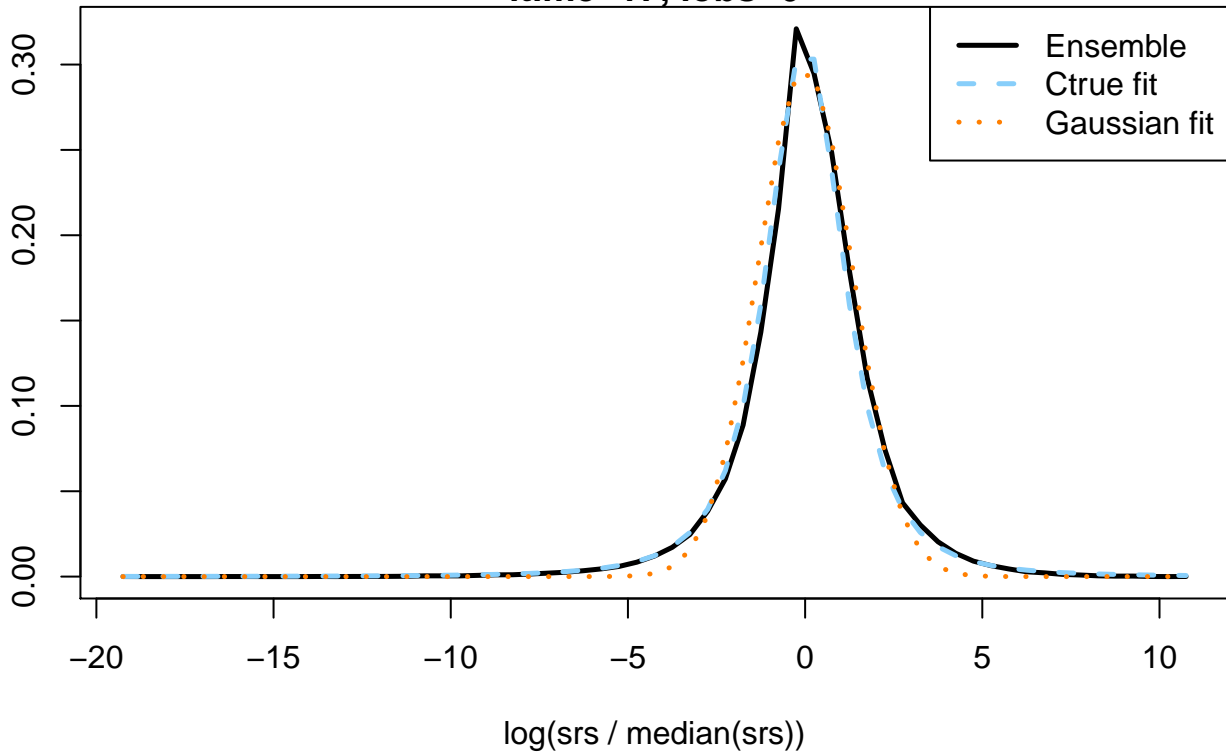

itime=17, iobs=7

density

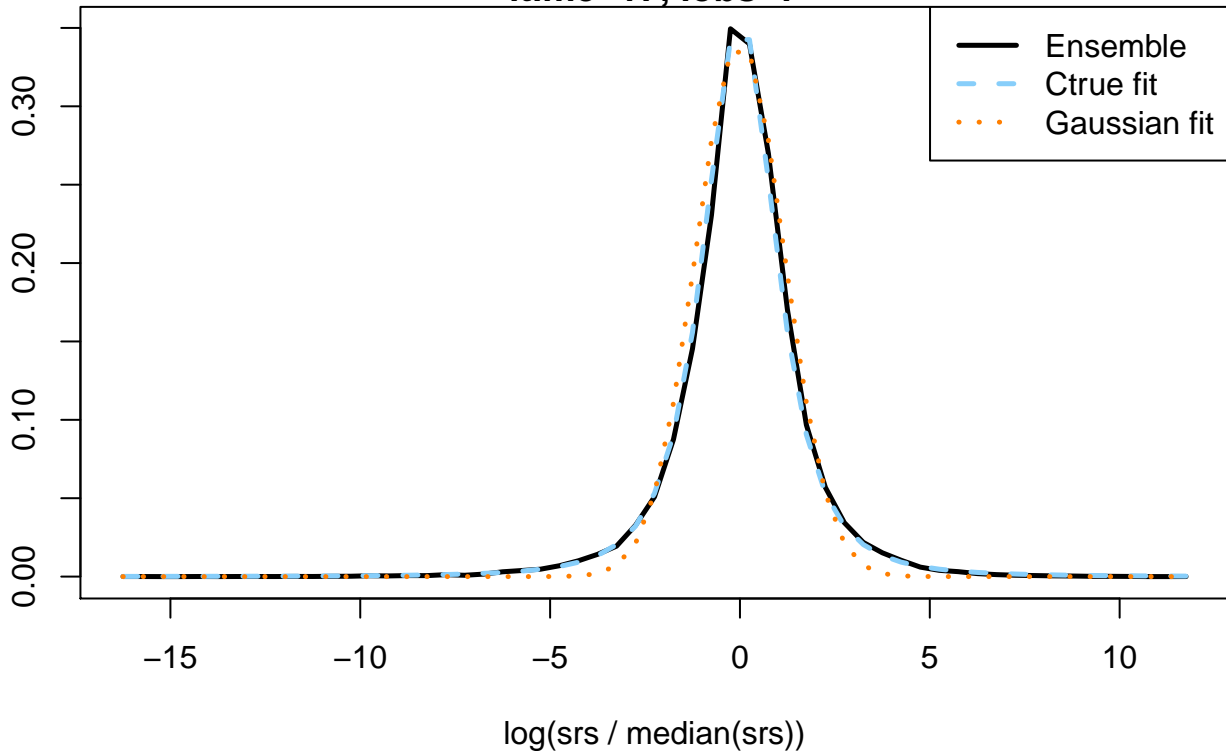

— Ensemble  
- - Ctrue fit  
... Gaussian fit

itime=17, iobs=8

density

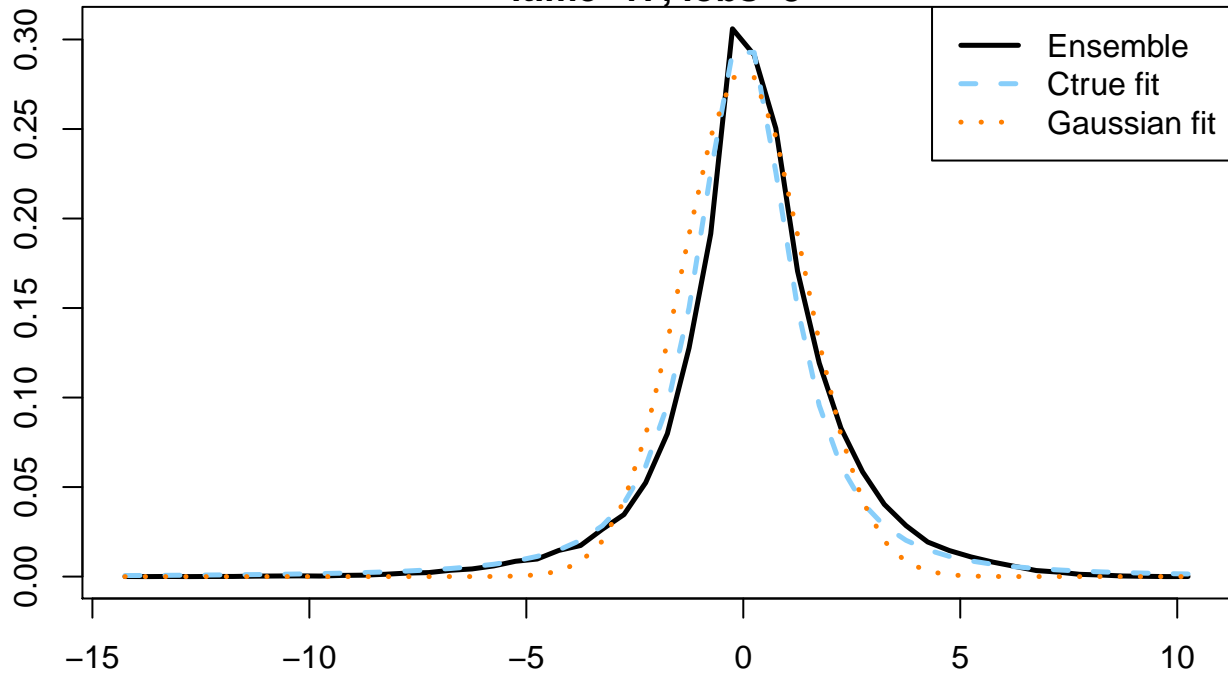

— Ensemble  
- - Ctrue fit  
... Gaussian fit

$\log(\text{srs} / \text{median}(\text{srs}))$



itime=17, iobs=9

density

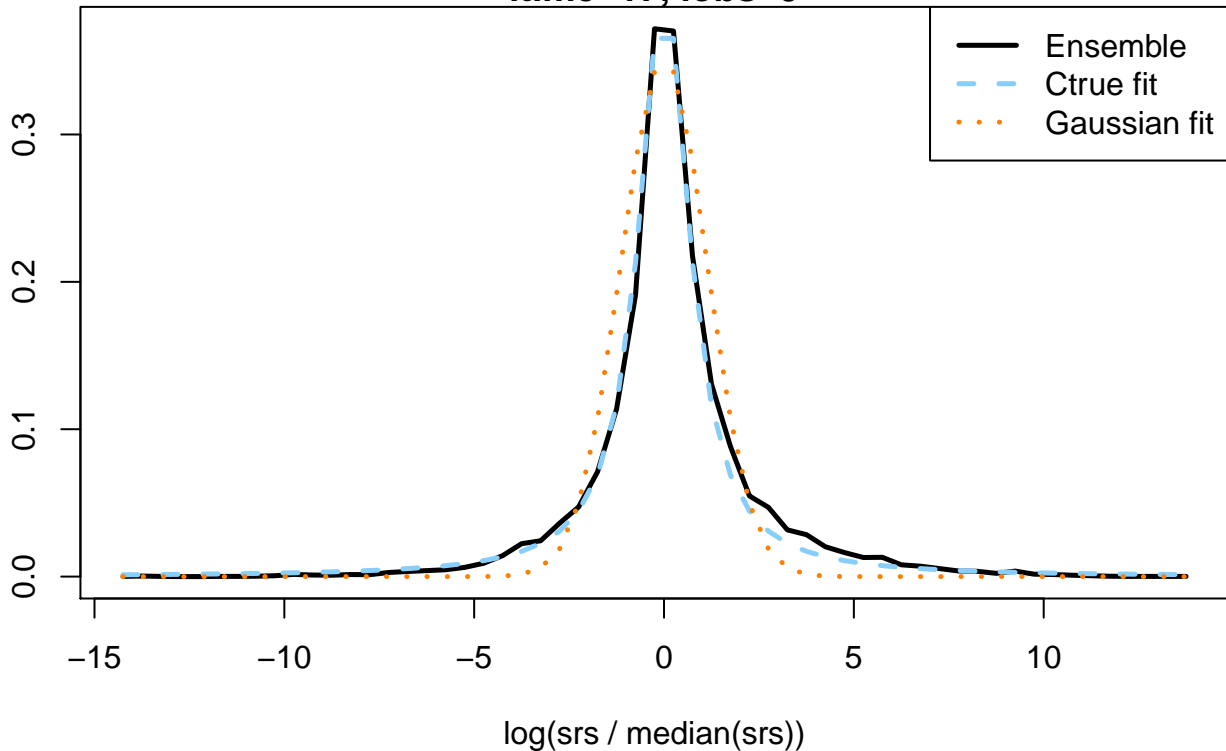

itime=18, iobs=10

density

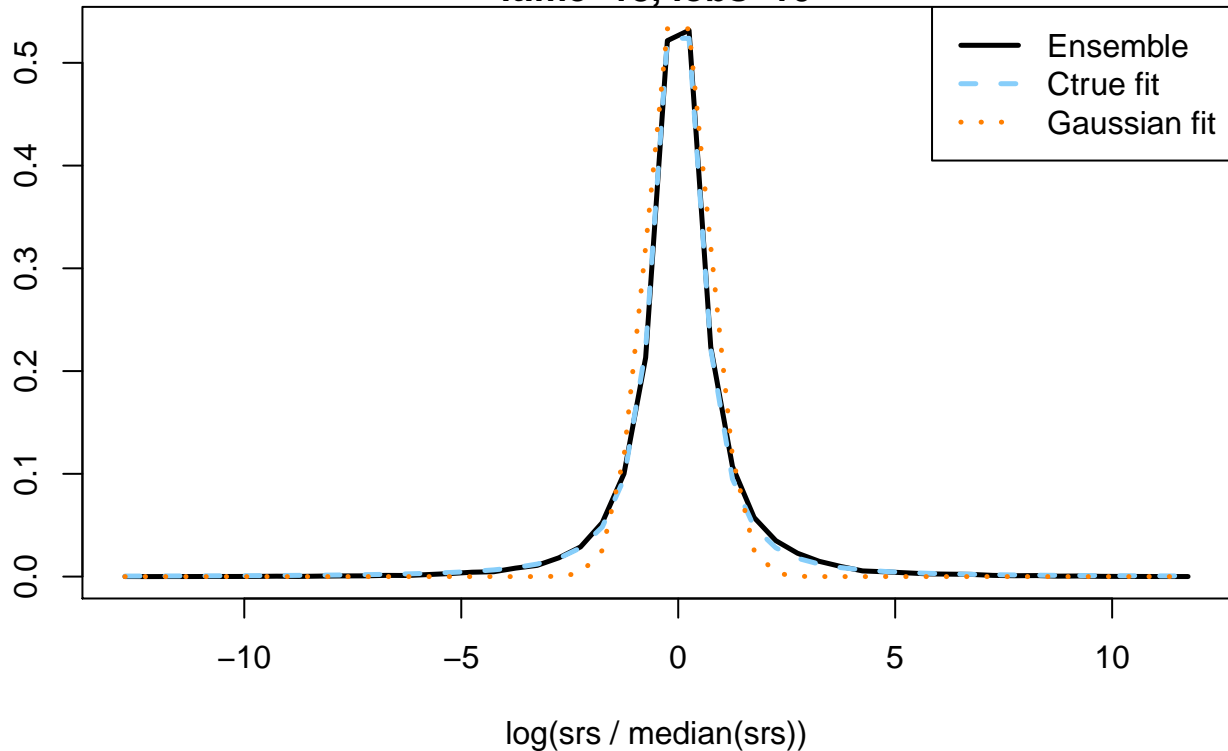

itime=18, iobs=11

density

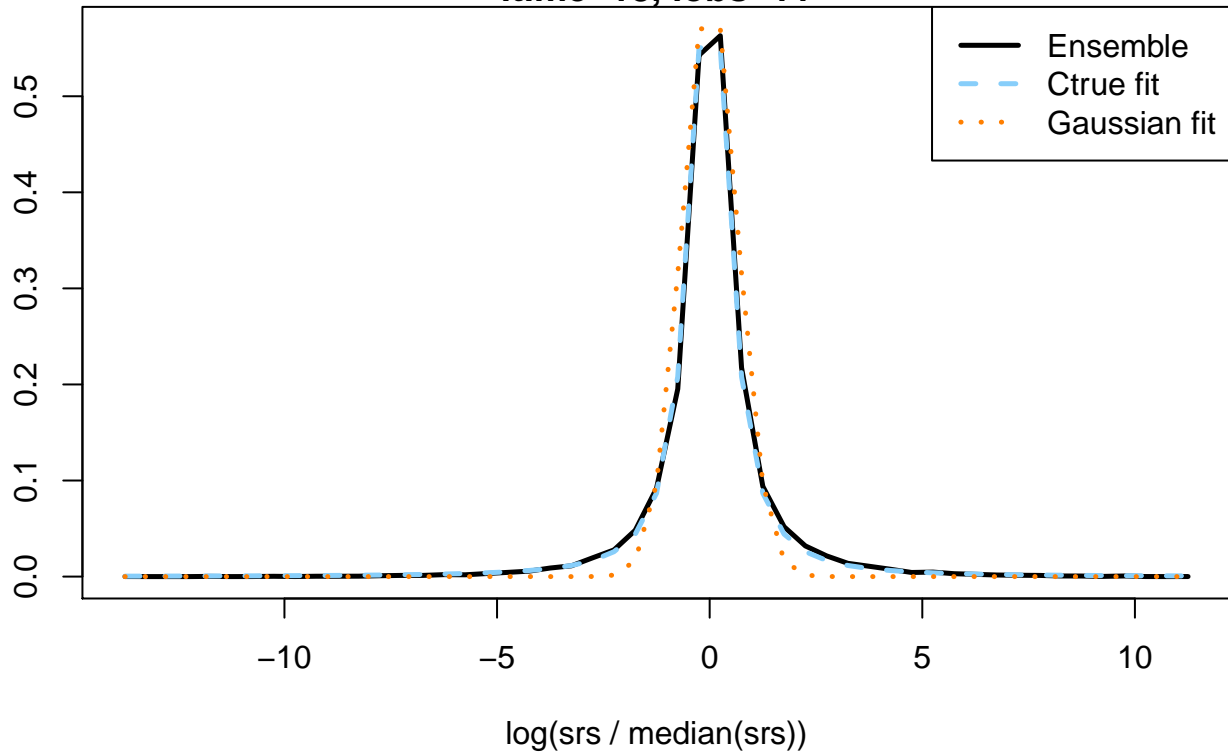

— Ensemble  
- - Ctrue fit  
... Gaussian fit

itime=18, iobs=12

density

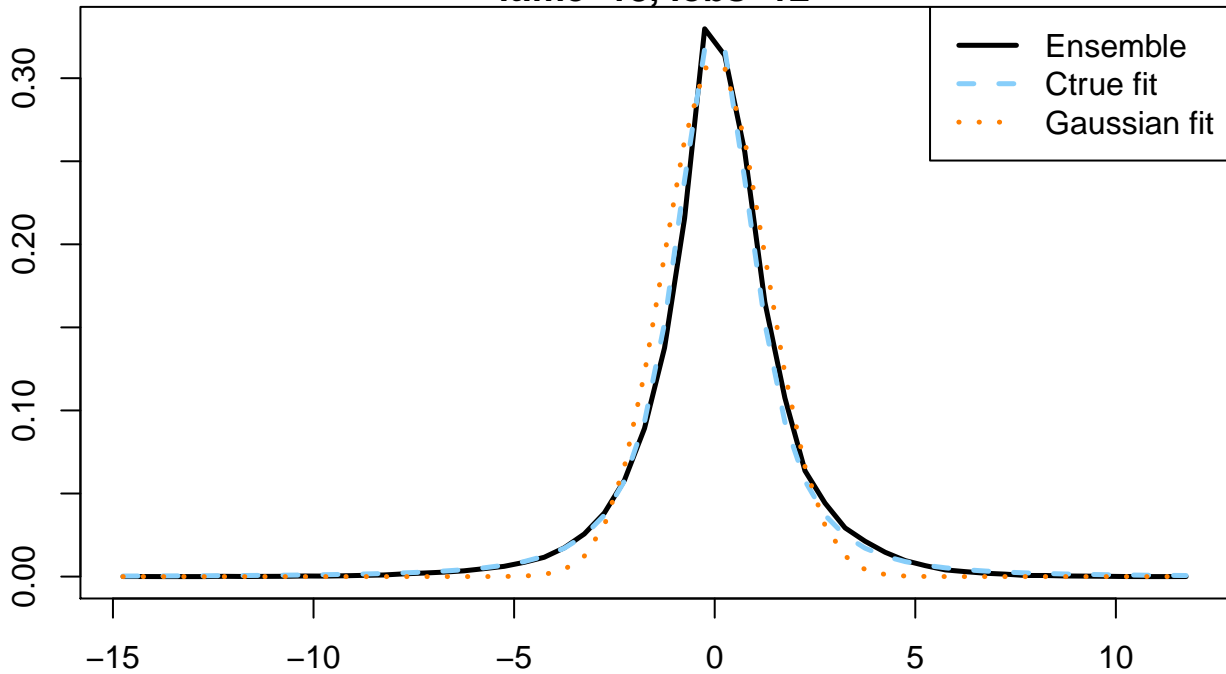

— Ensemble  
- - Ctrue fit  
... Gaussian fit

$\log(\text{srs} / \text{median}(\text{srs}))$

itime=18, iobs=1

density

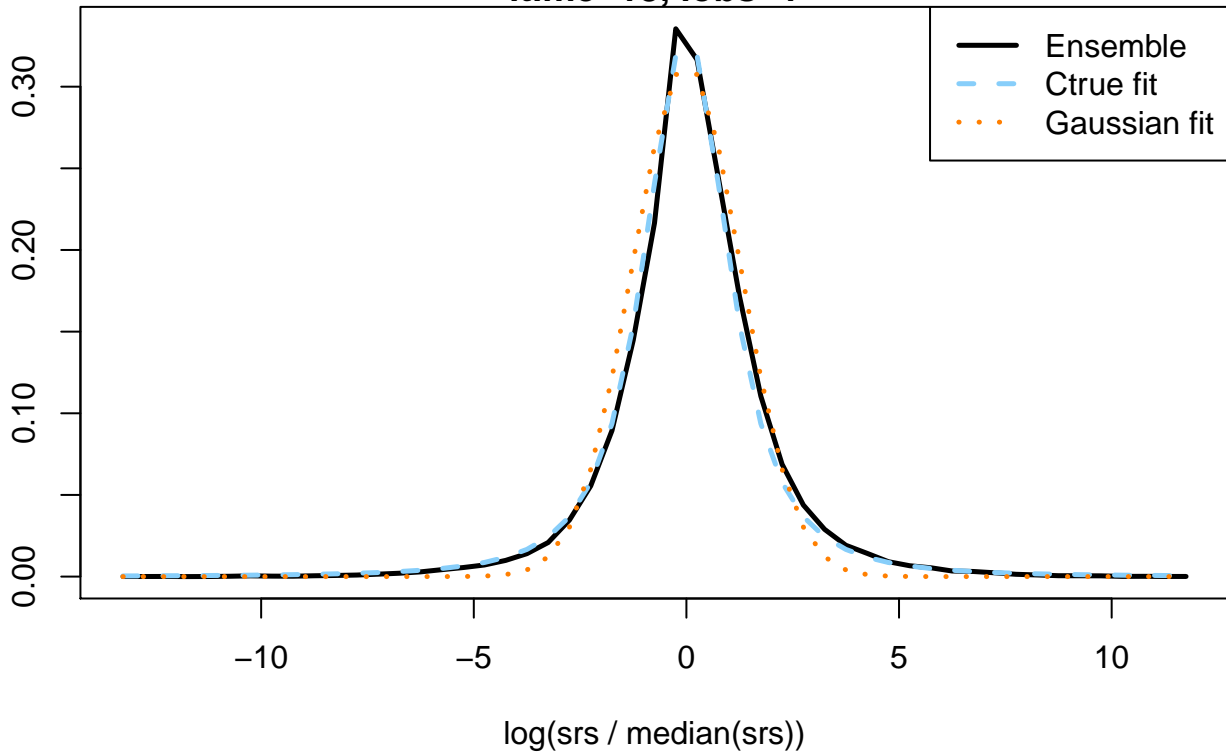

— Ensemble  
- - Ctrue fit  
... Gaussian fit

itime=18, iobs=2

density

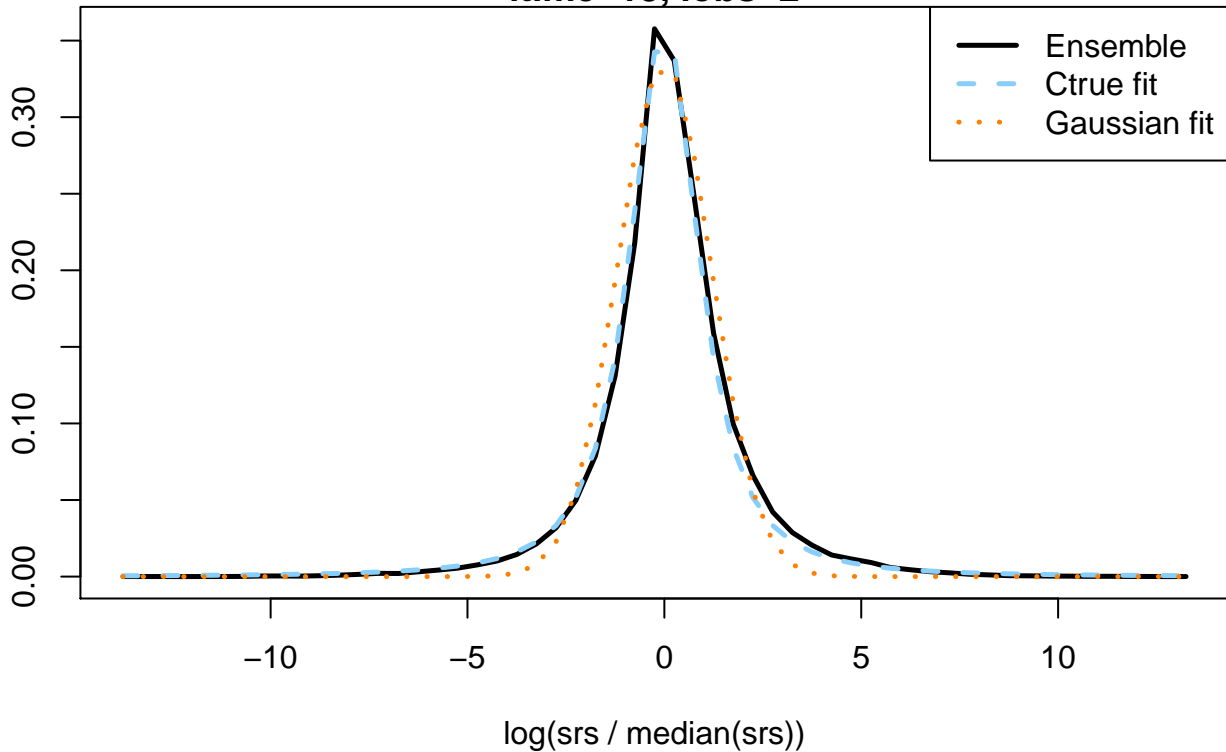

itime=18, iobs=3

density

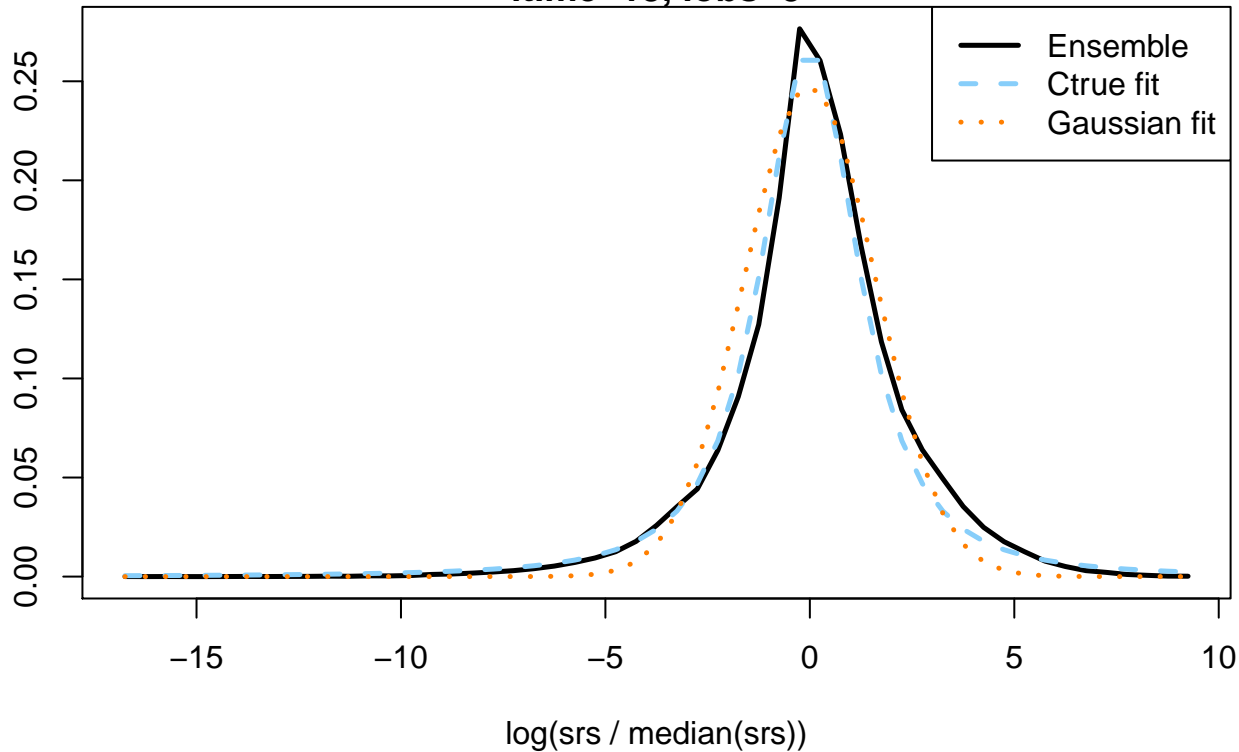

itime=18, iobs=4

density

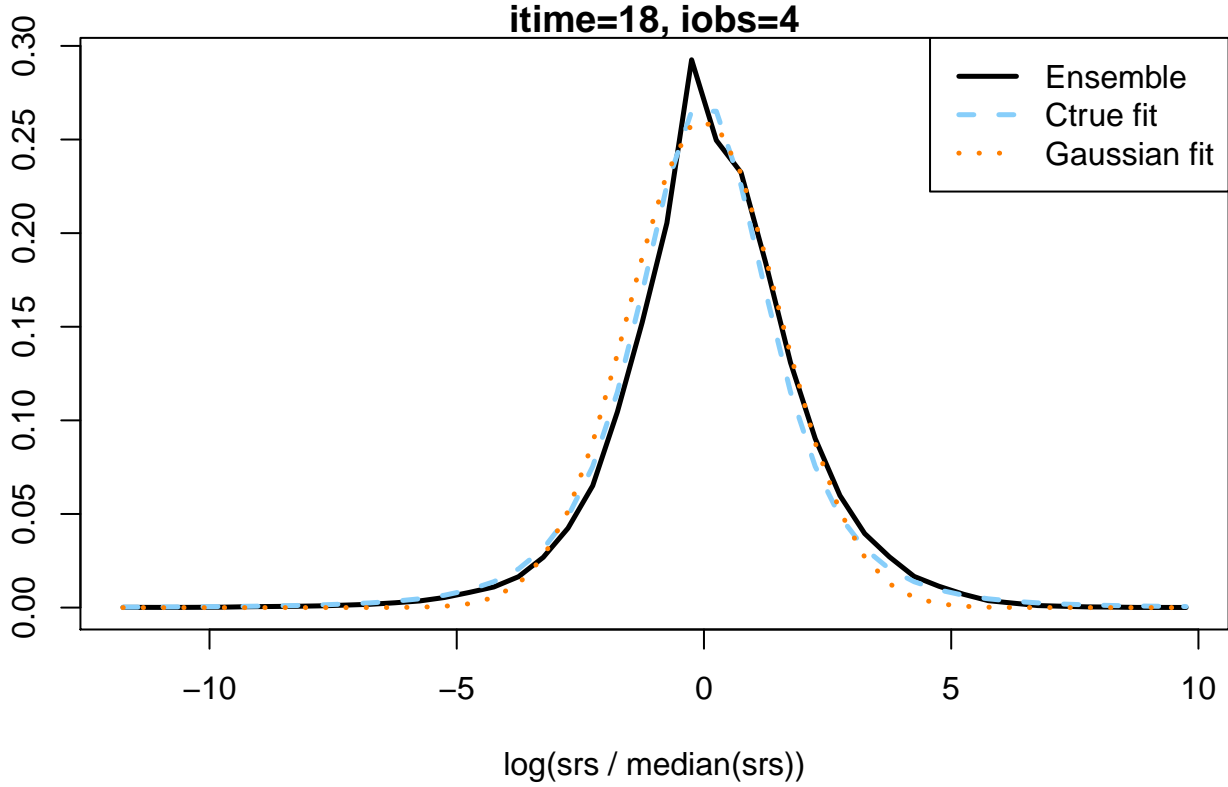



itime=18, iobs=5

density

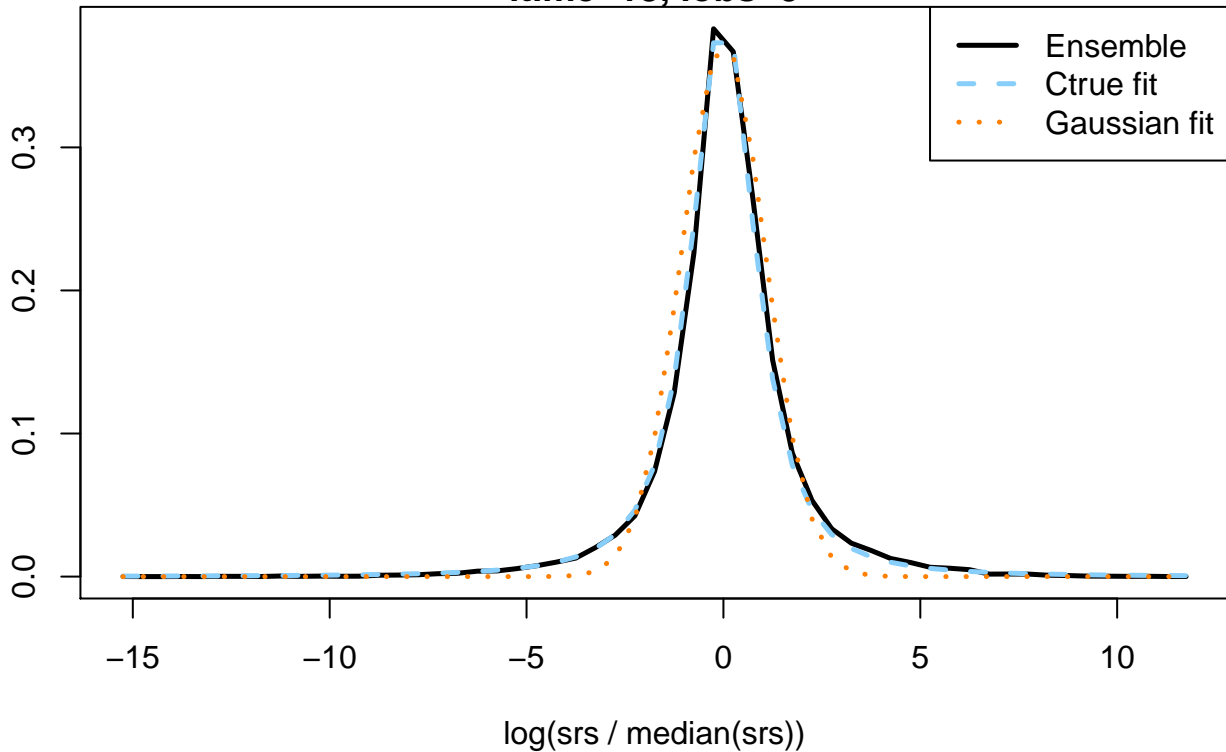

— Ensemble  
- - Ctrue fit  
... Gaussian fit

itime=18, iobs=6

density

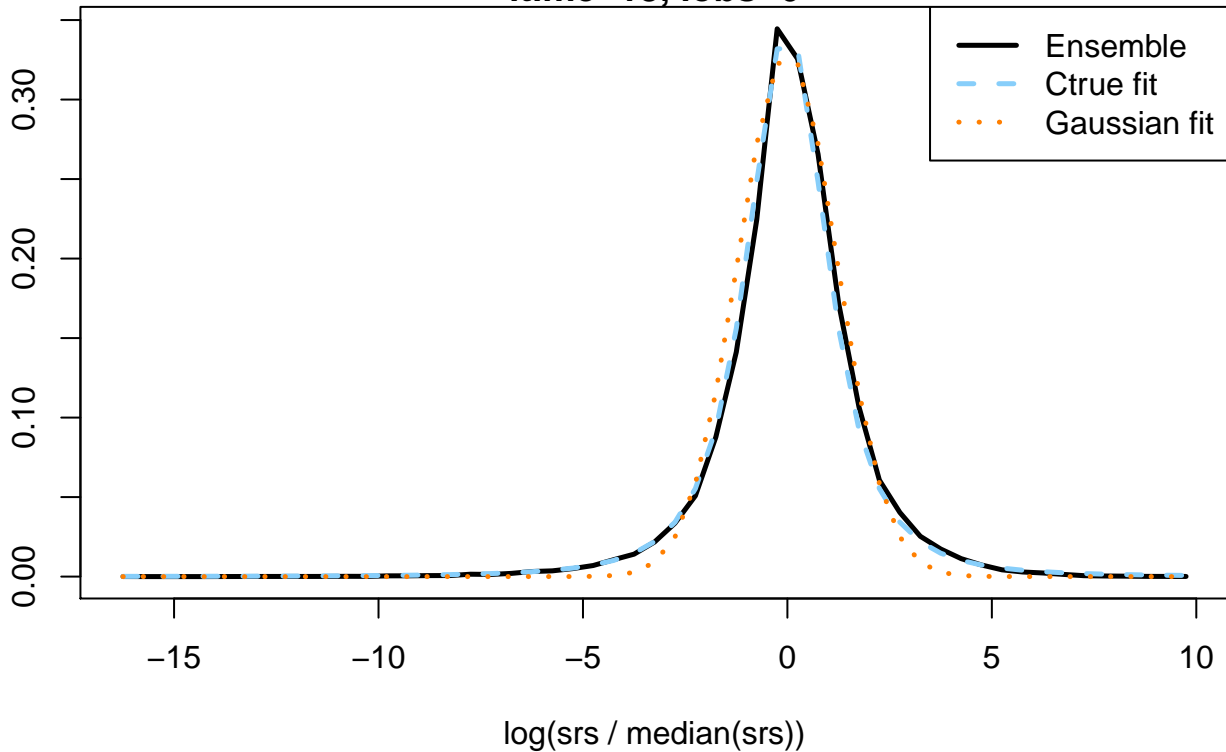

— Ensemble  
- - Ctrue fit  
... Gaussian fit

itime=18, iobs=7

density

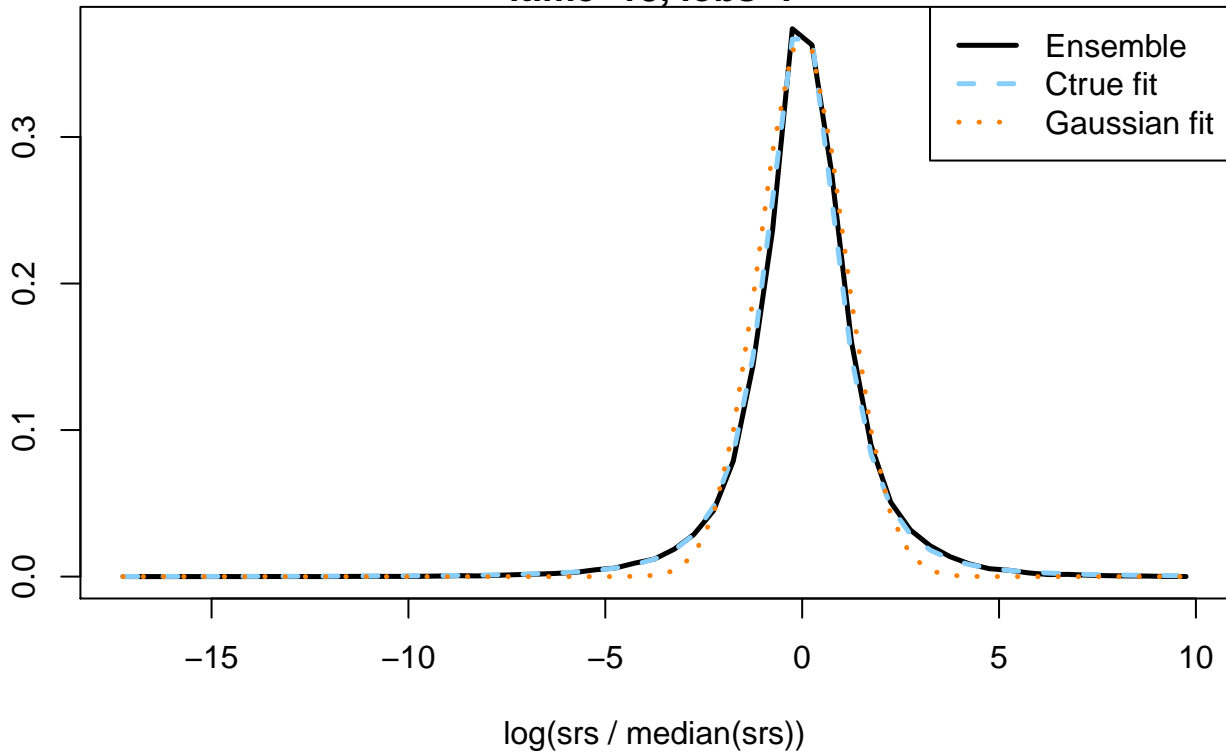

itime=18, iobs=8

density

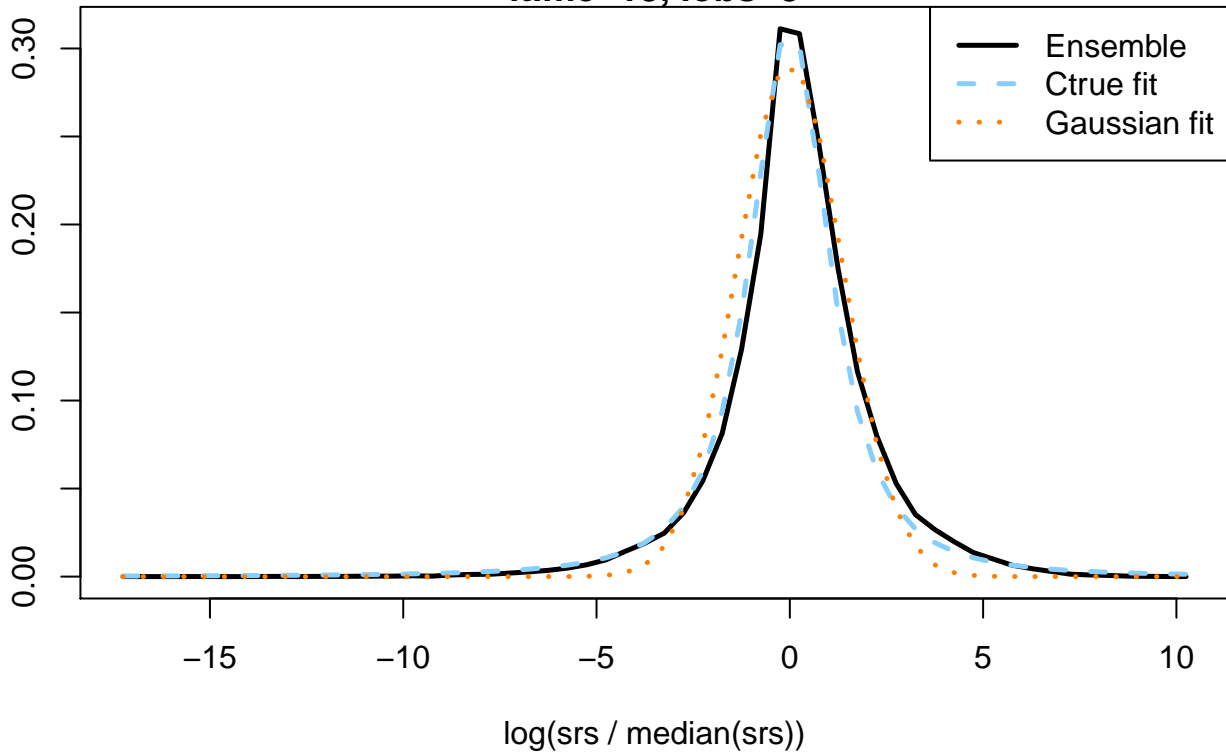

— Ensemble  
- - Ctrue fit  
... Gaussian fit

itime=18, iobs=9

density

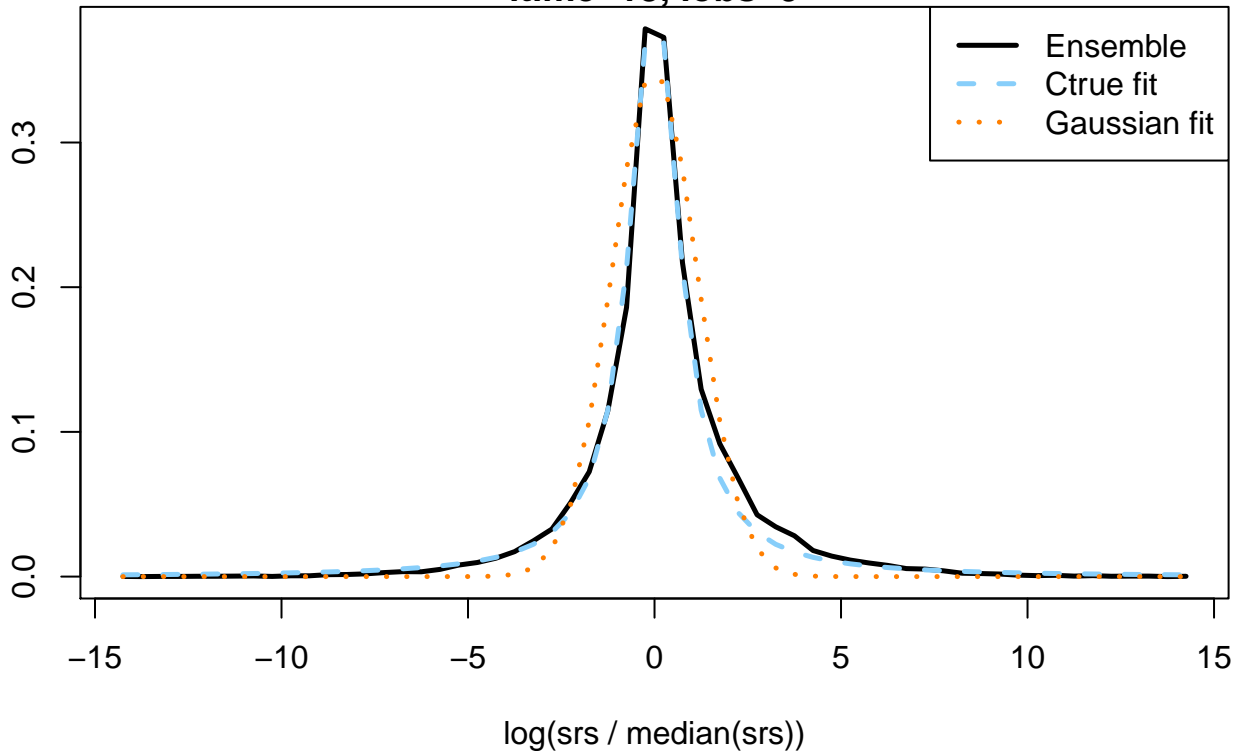

itime=19, iobs=10

density

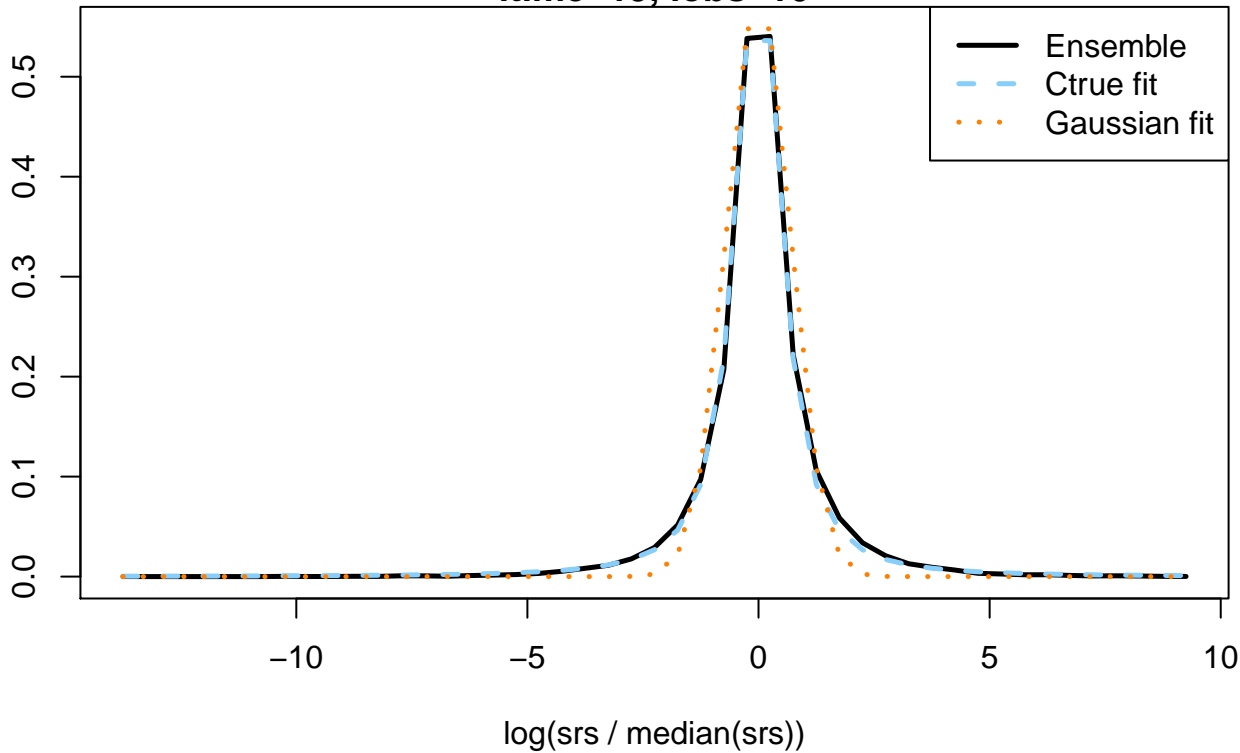

— Ensemble  
- - Ctrue fit  
... Gaussian fit

itime=19, iobs=11

density

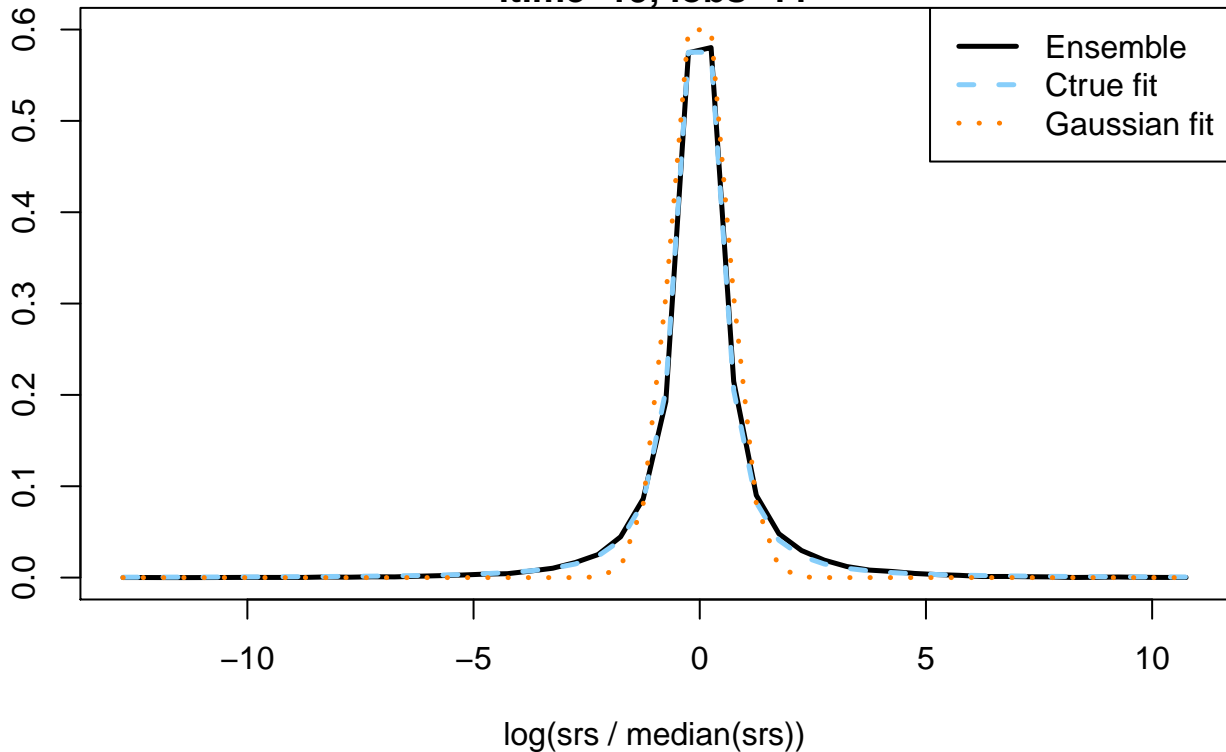

itime=19, iobs=12

density

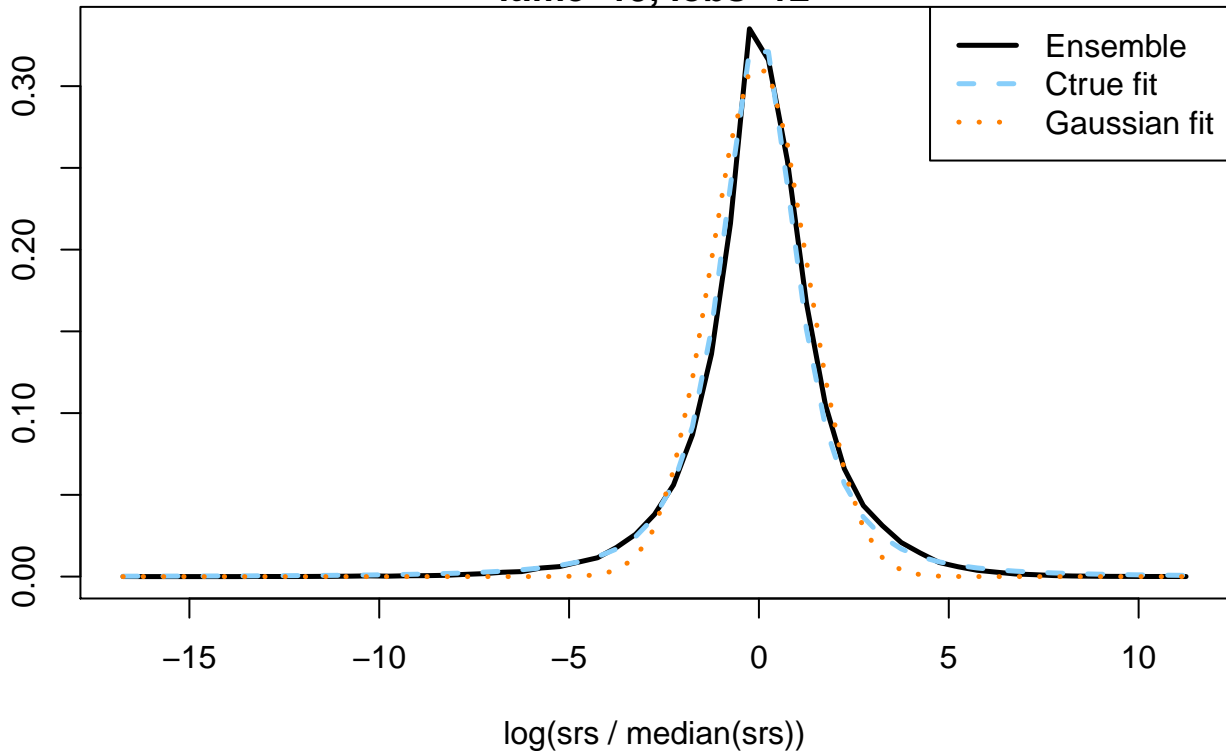

— Ensemble  
- - Ctrue fit  
... Gaussian fit



itime=19, iobs=1

density

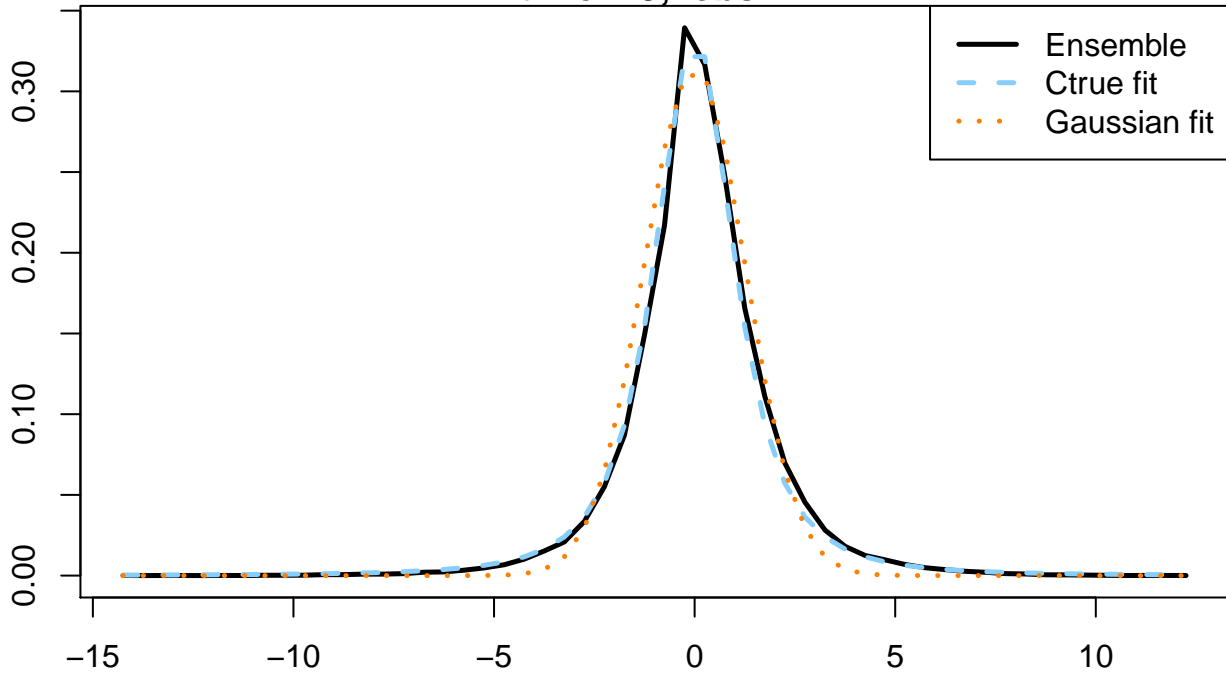

— Ensemble  
- - Ctrue fit  
... Gaussian fit

$\log(\text{srs} / \text{median}(\text{srs}))$

itime=19, iobs=2

density

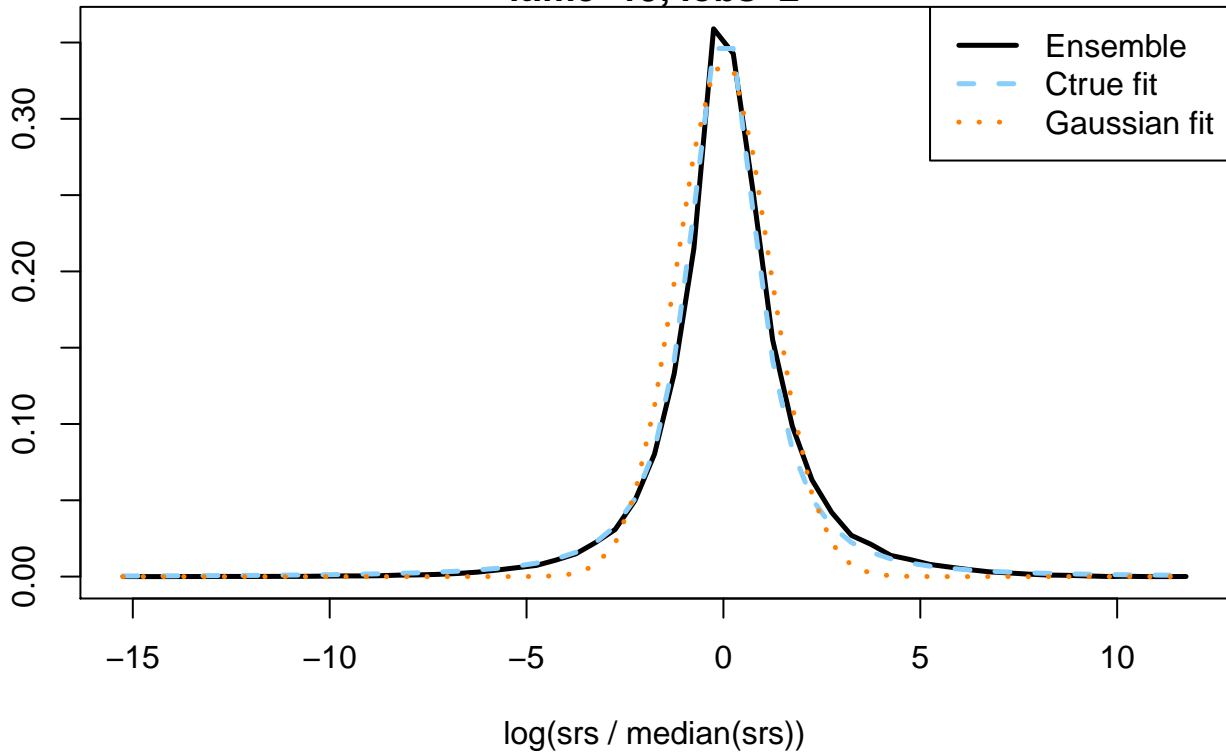

— Ensemble  
- - Ctrue fit  
... Gaussian fit

itime=19, iobs=3

density

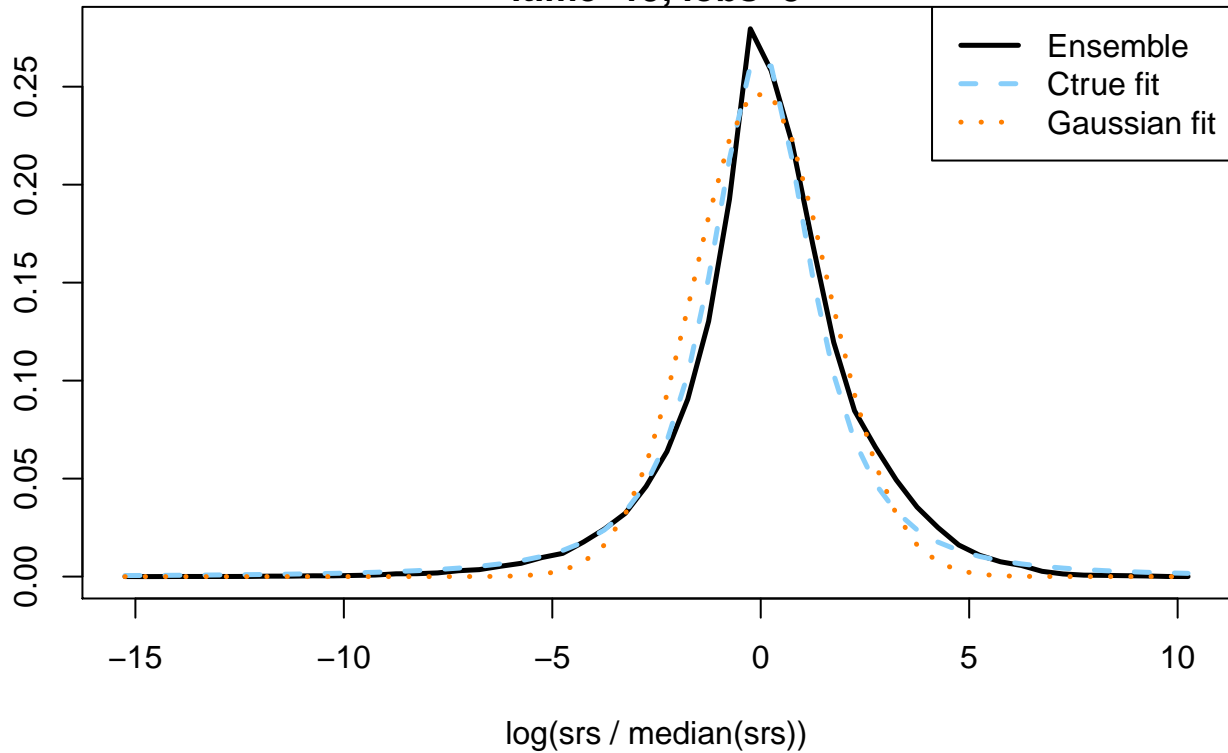

itime=19, iobs=4

density

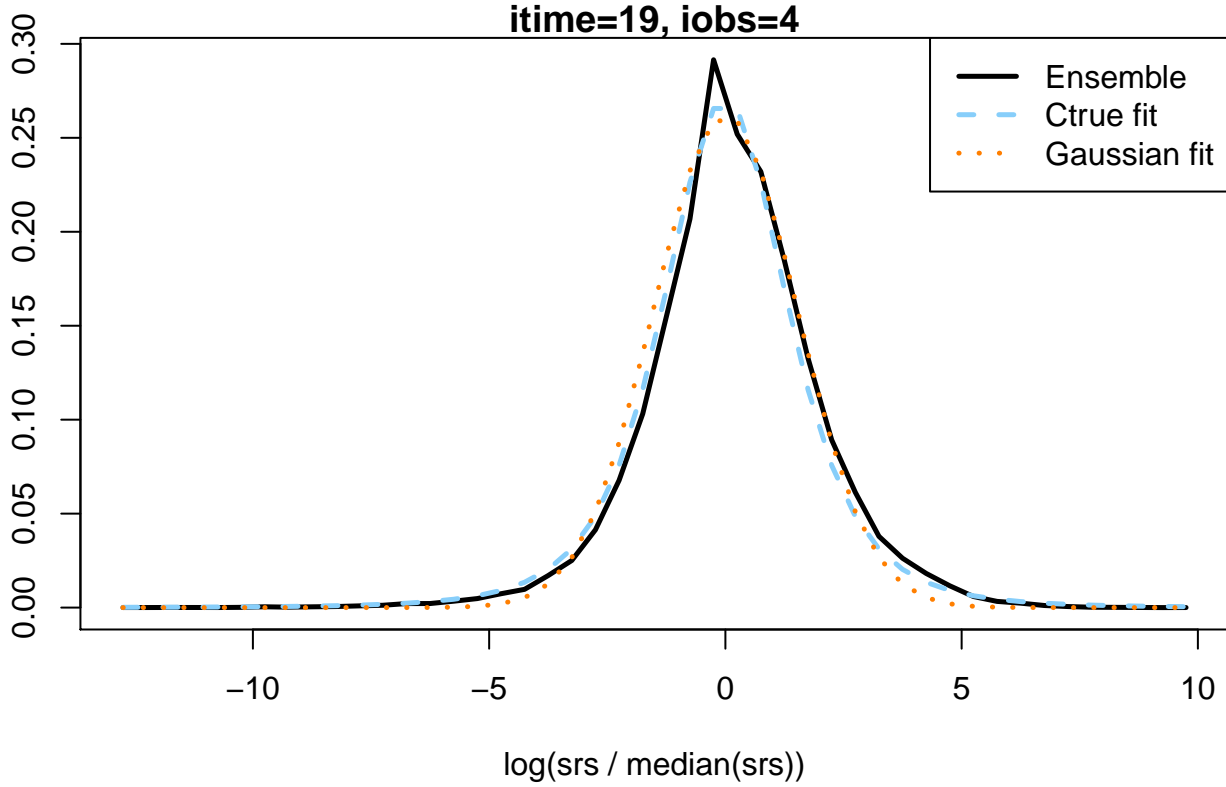

itime=19, iobs=5

density

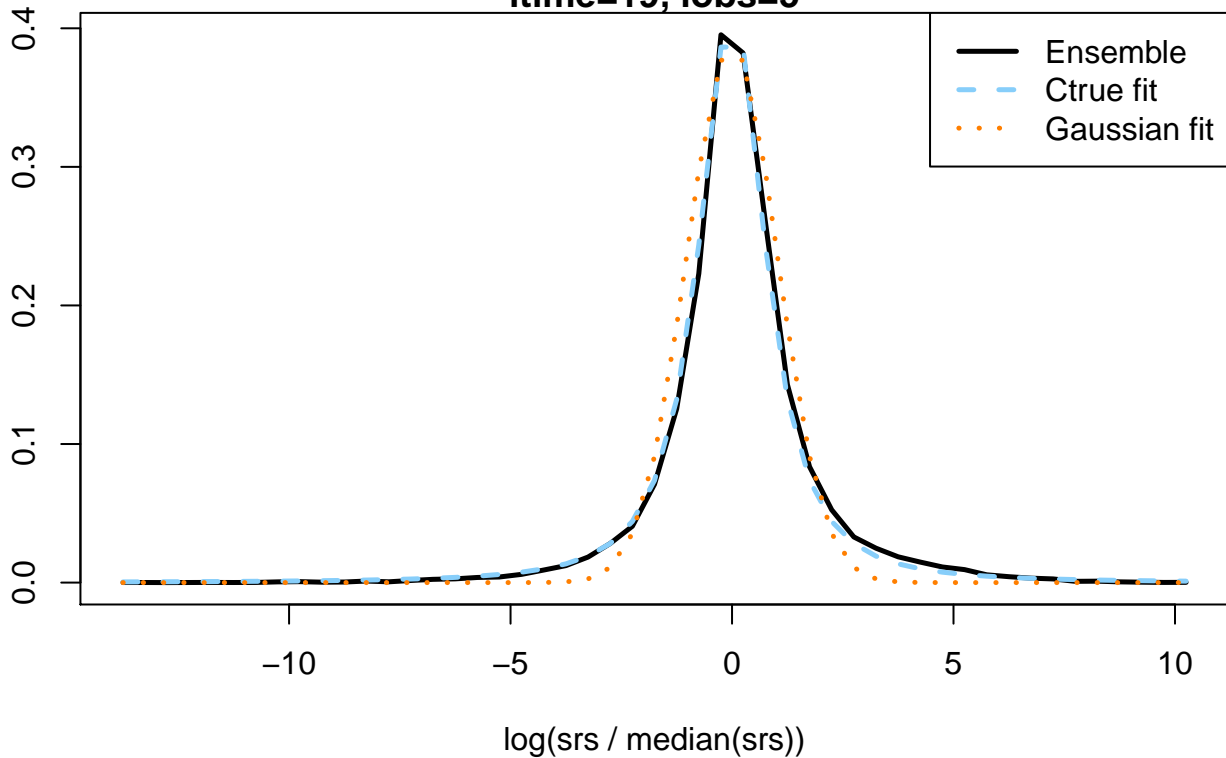

— Ensemble  
- - Ctrue fit  
... Gaussian fit

itime=19, iobs=6

density

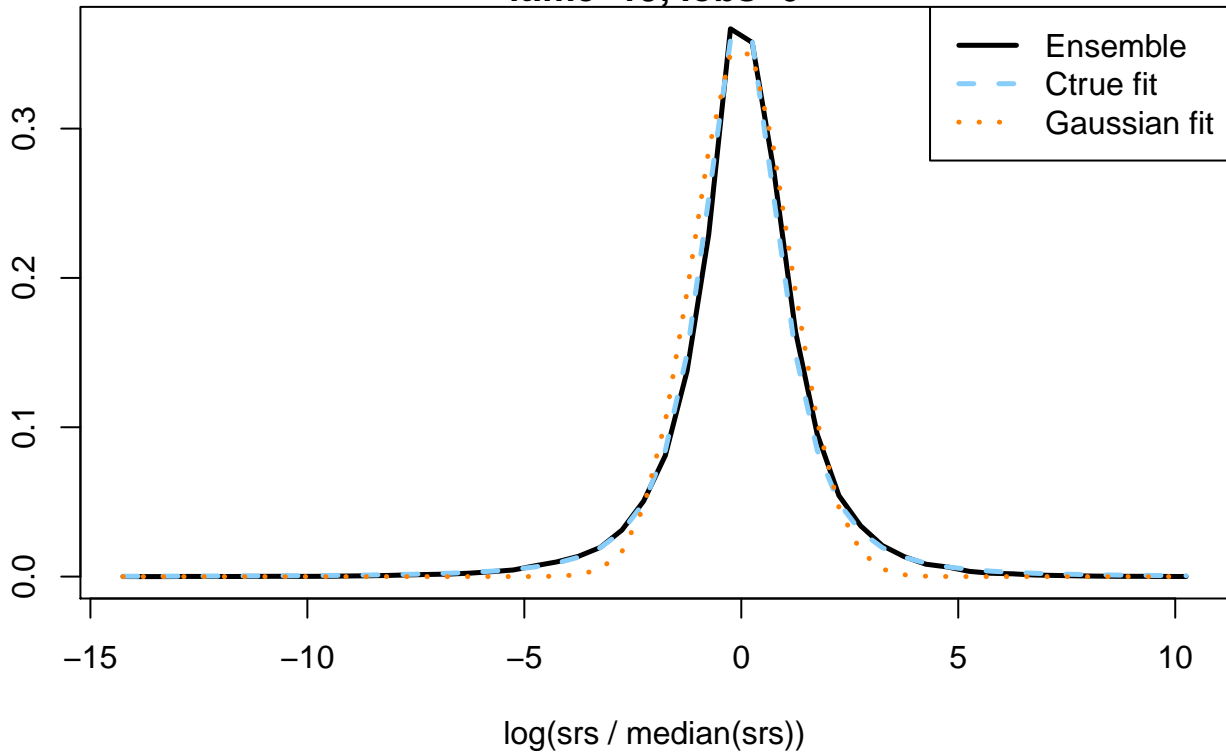

itime=19, iobs=7

density

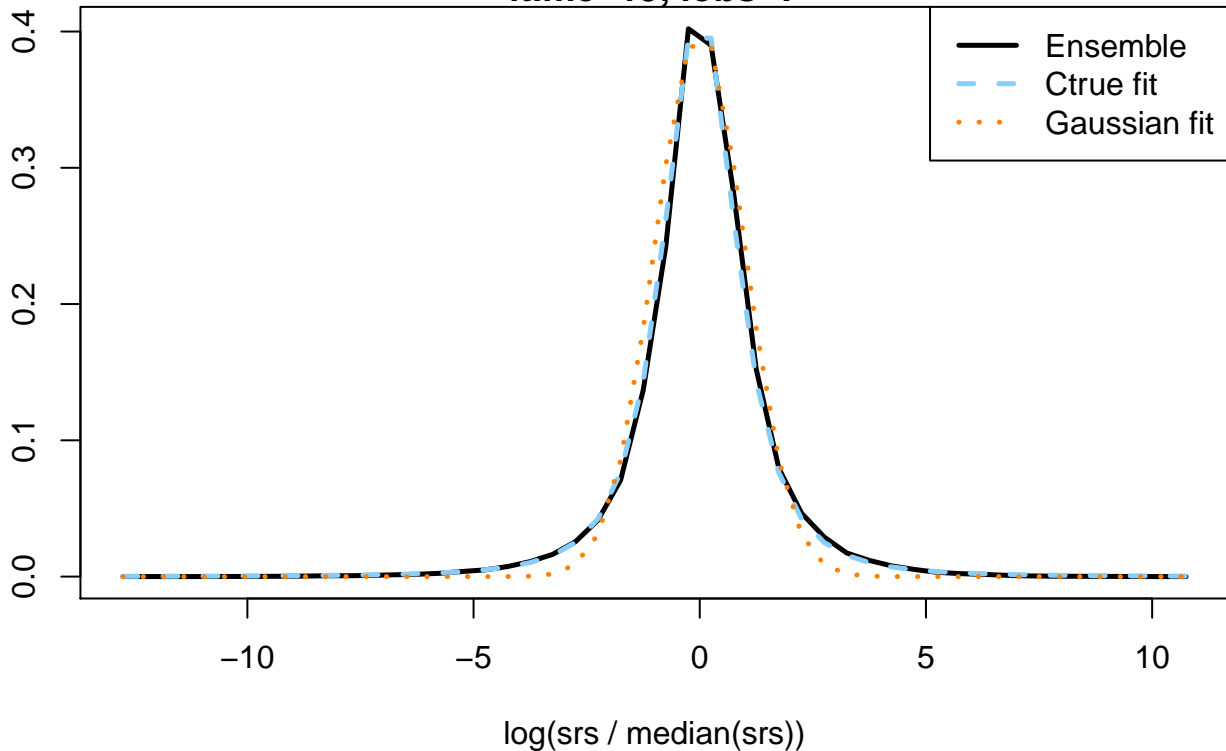

itime=19, iobs=8

density

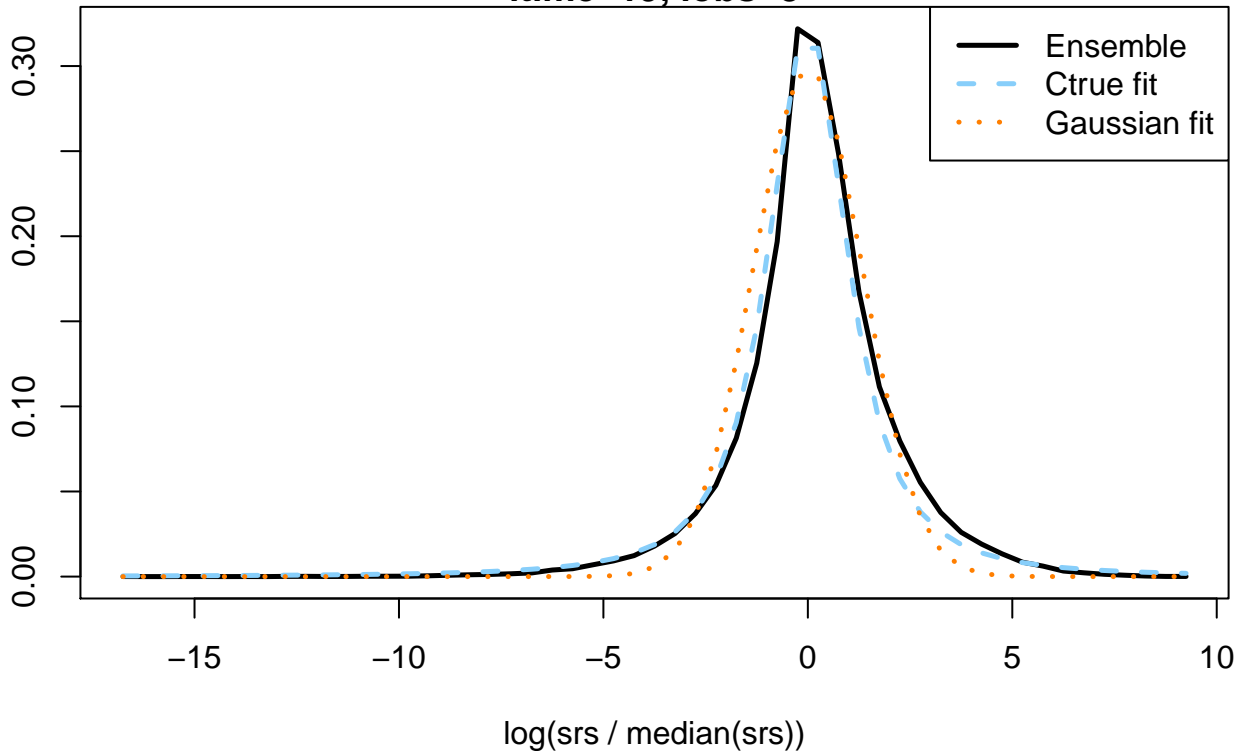

— Ensemble  
- - Ctrue fit  
... Gaussian fit



itime=19, iobs=9

density

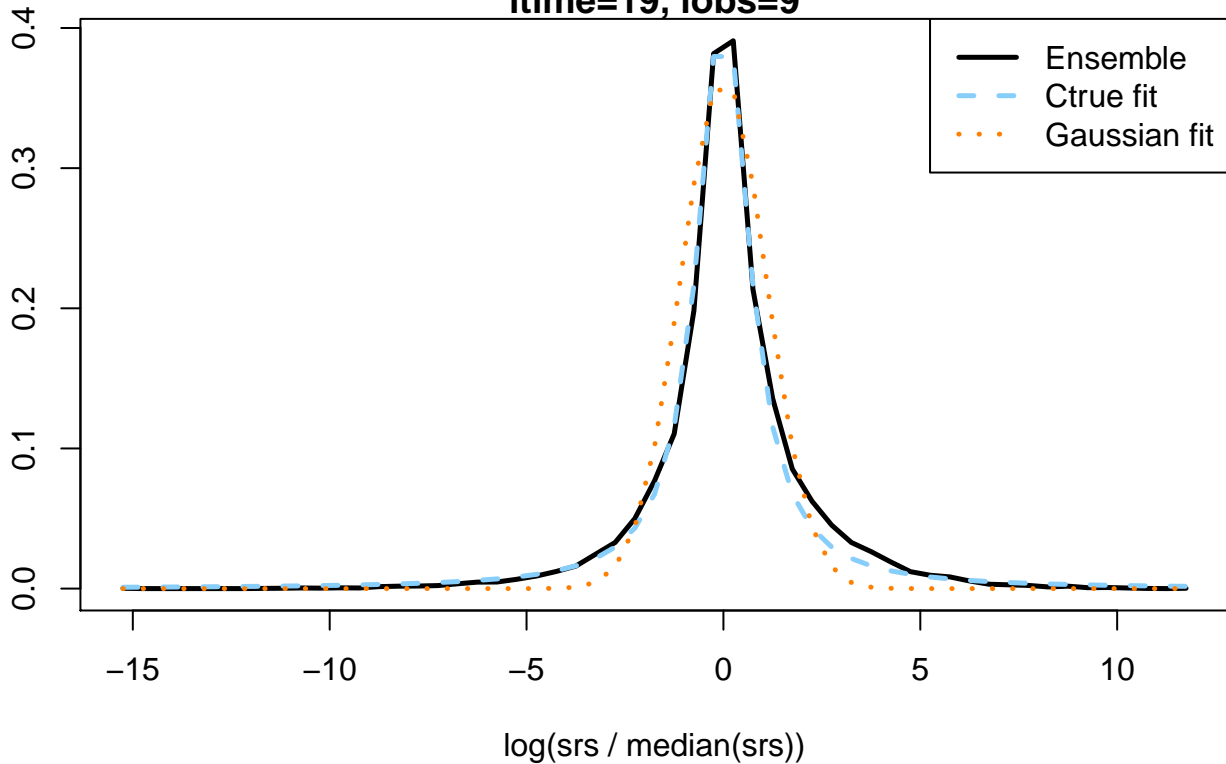

itime=1, iobs=10

density

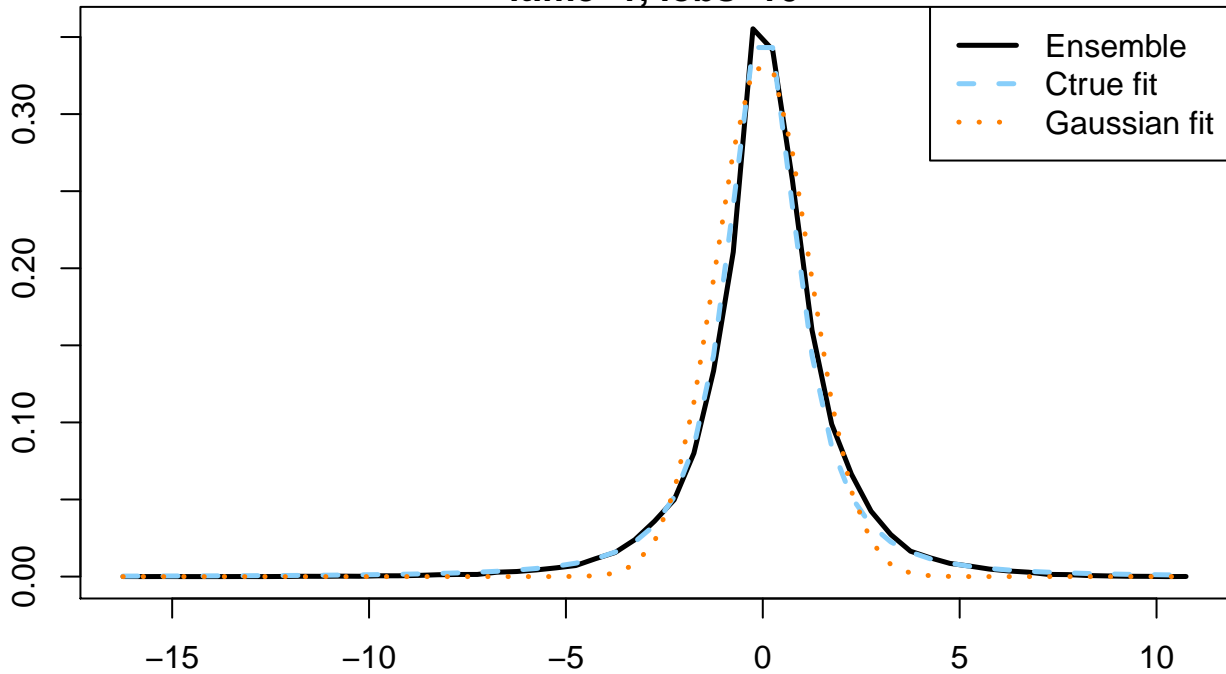

— Ensemble  
- - Ctrue fit  
... Gaussian fit

$\log(\text{srs} / \text{median}(\text{srs}))$

itime=1, iobs=11

density

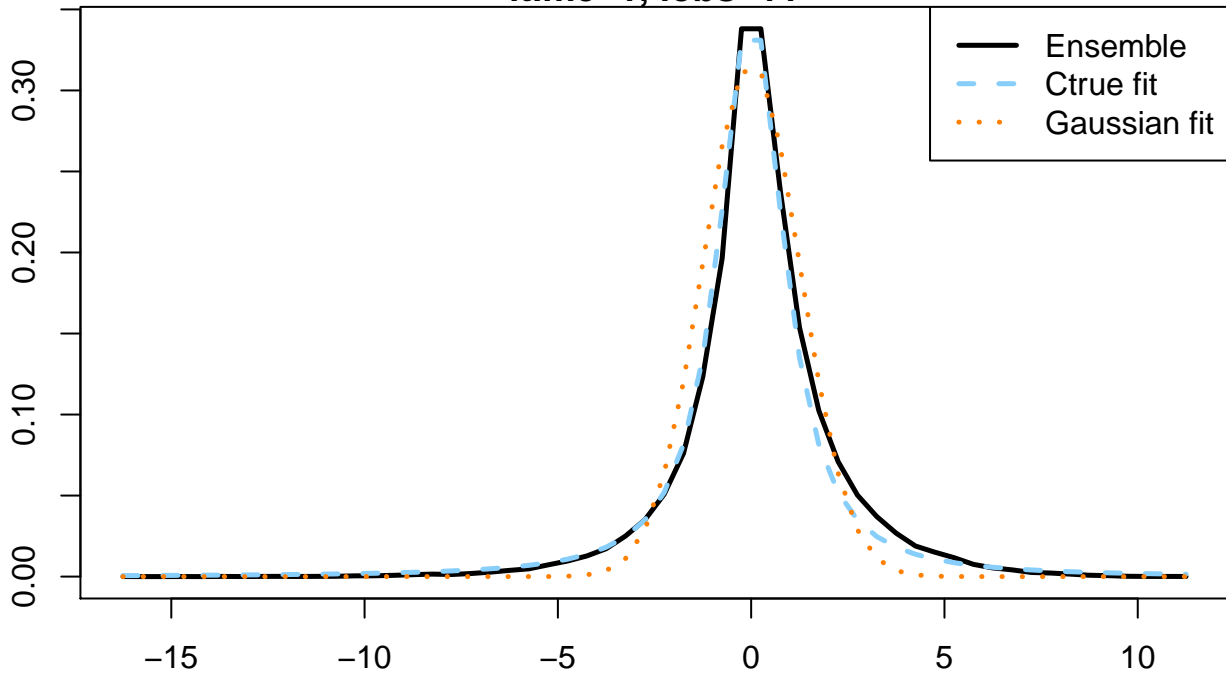

log(srs / median(srs))

itime=1, iobs=12

density

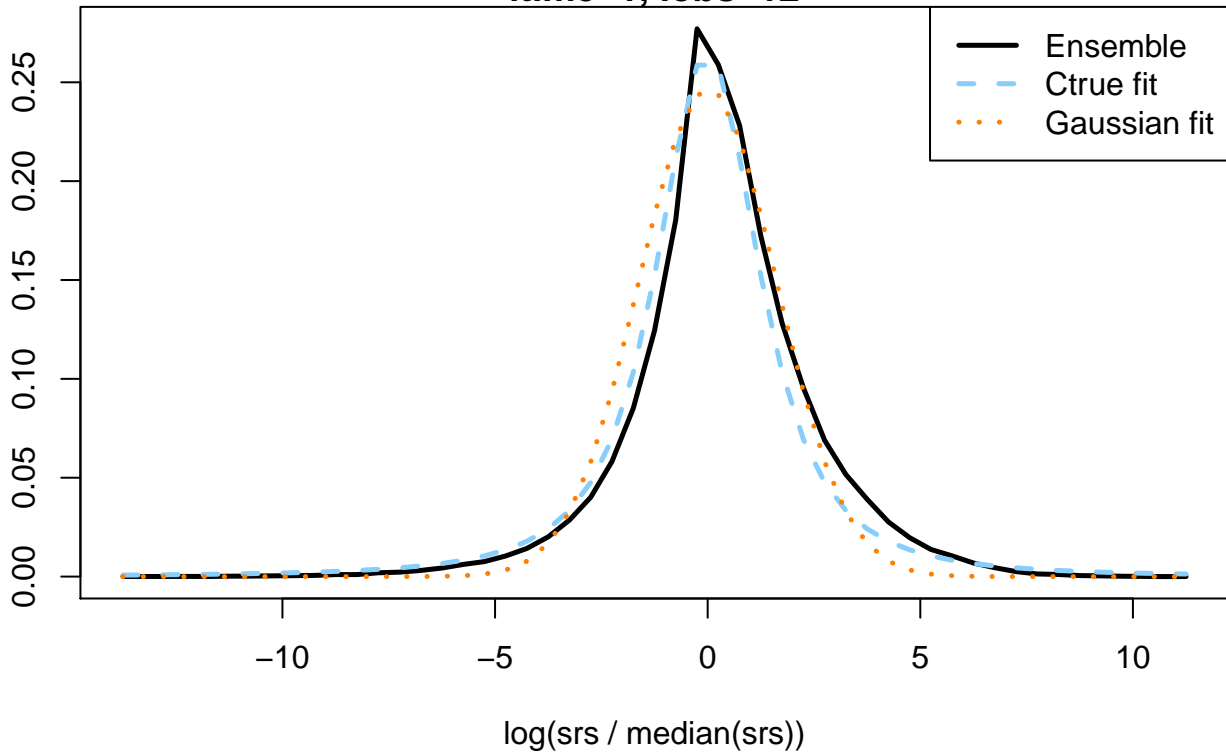

itime=1, iobs=1

density

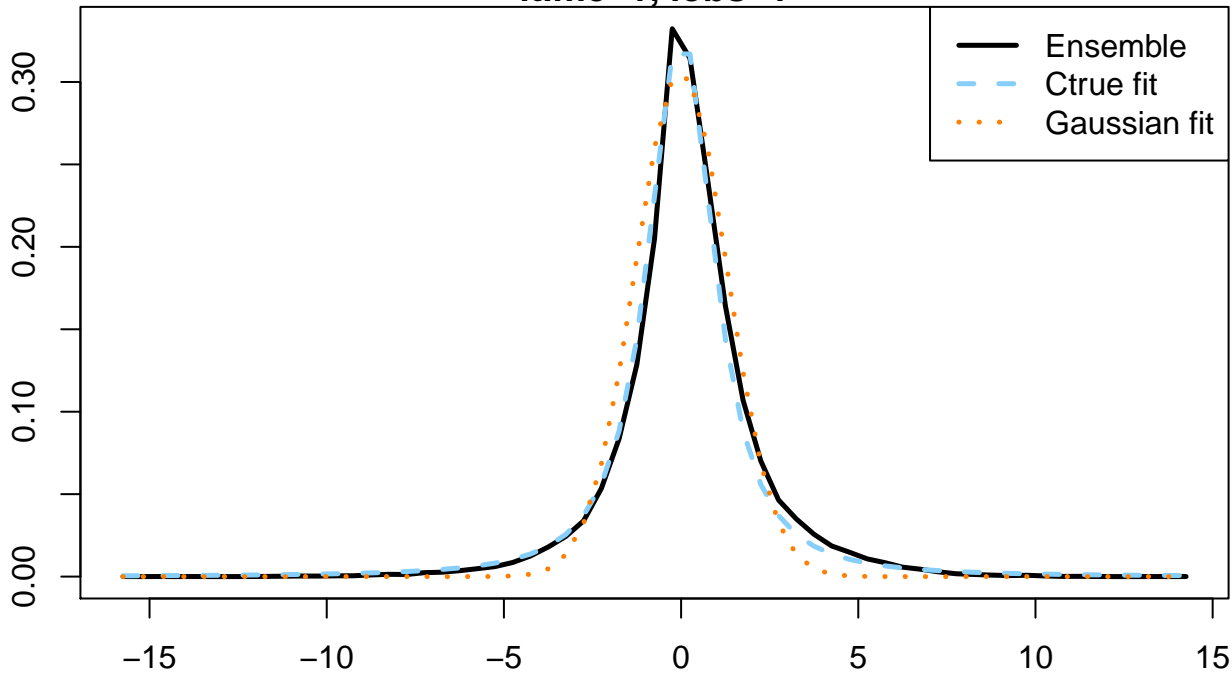

log(srs / median(srs))

itime=1, iobs=2

density

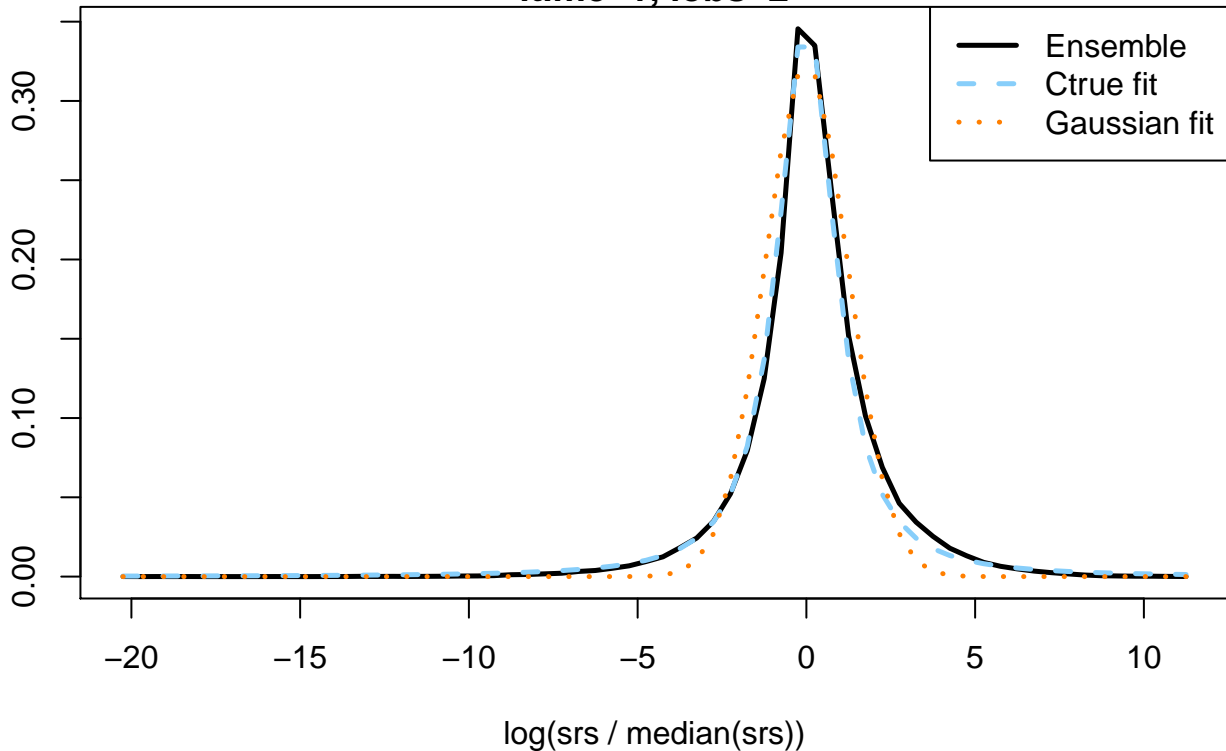

itime=1, iobs=3

density

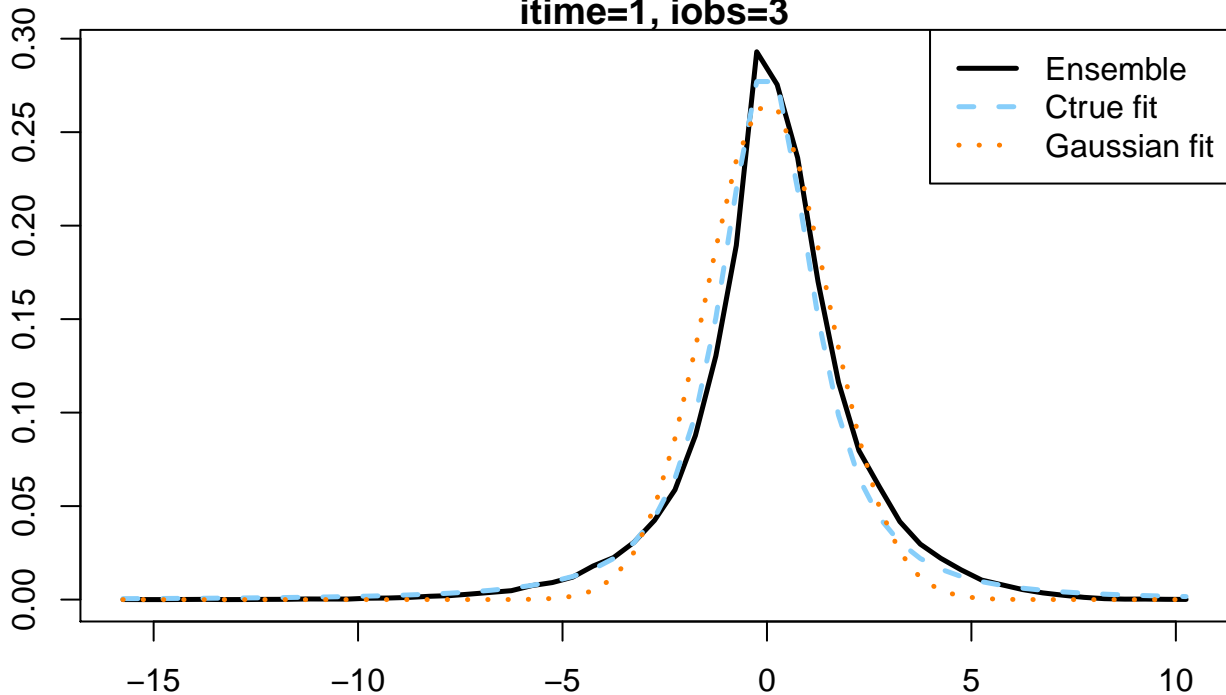

log(srs / median(srs))

itime=1, iobs=4

density

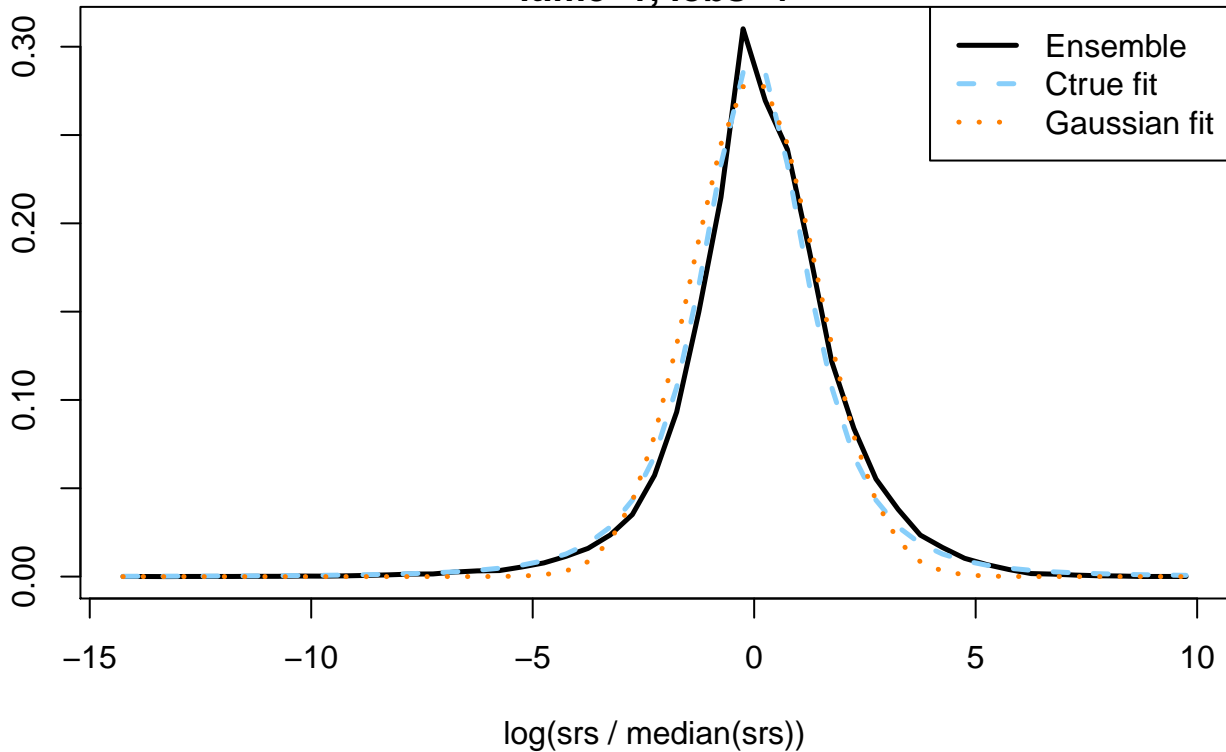

— Ensemble  
- - Ctrue fit  
... Gaussian fit



itime=1, iobs=5

density

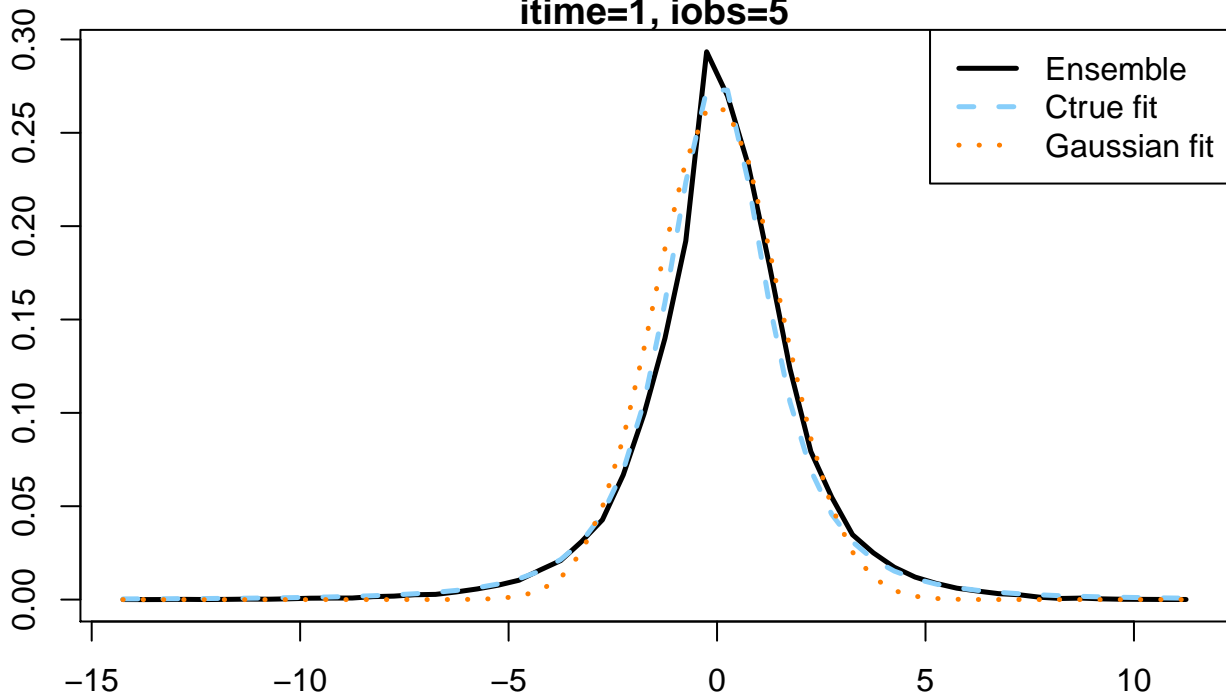

— Ensemble  
- - Ctrue fit  
... Gaussian fit

$\log(\text{srs} / \text{median}(\text{srs}))$

itime=1, iobs=6

density

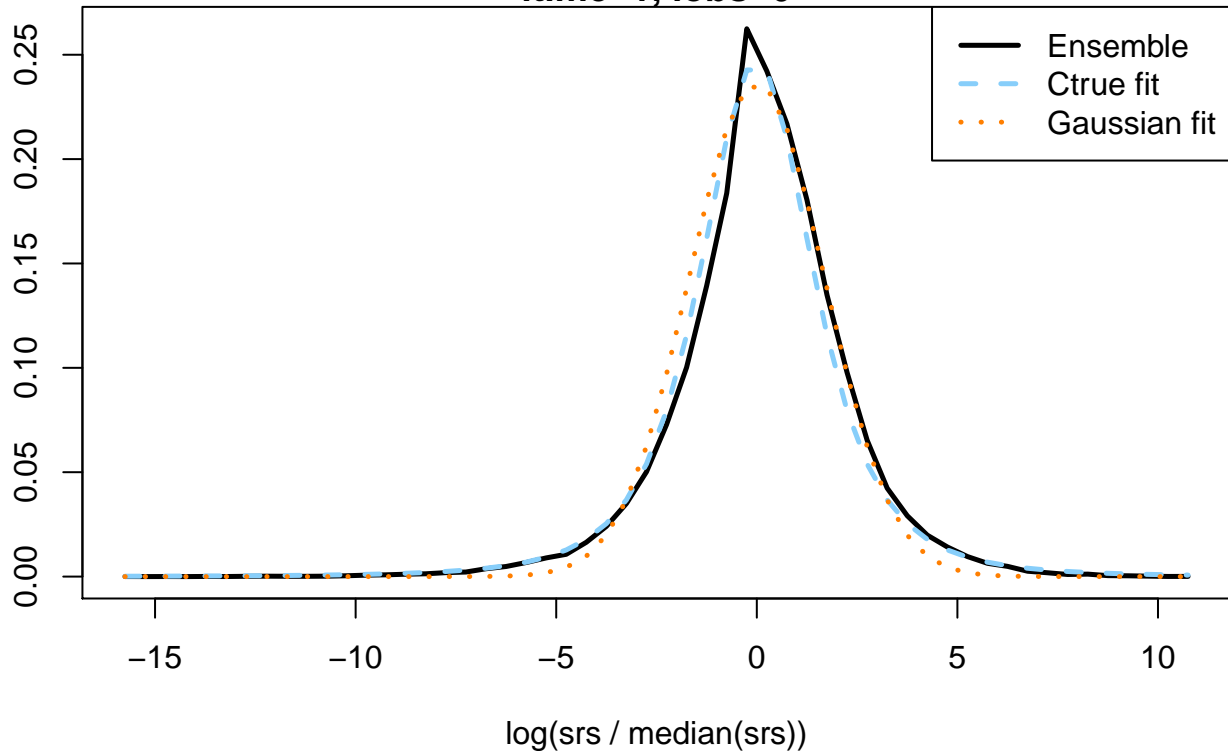

itime=1, iobs=7

density

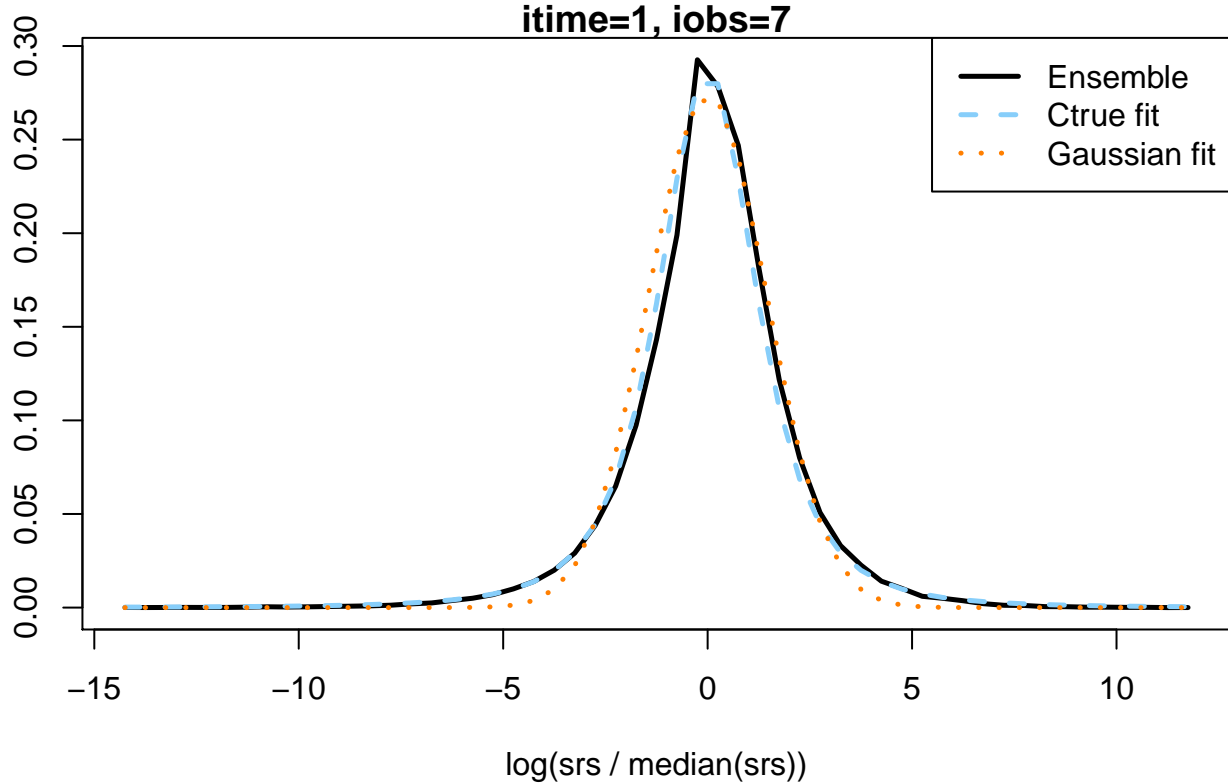

itime=1, iobs=8

density

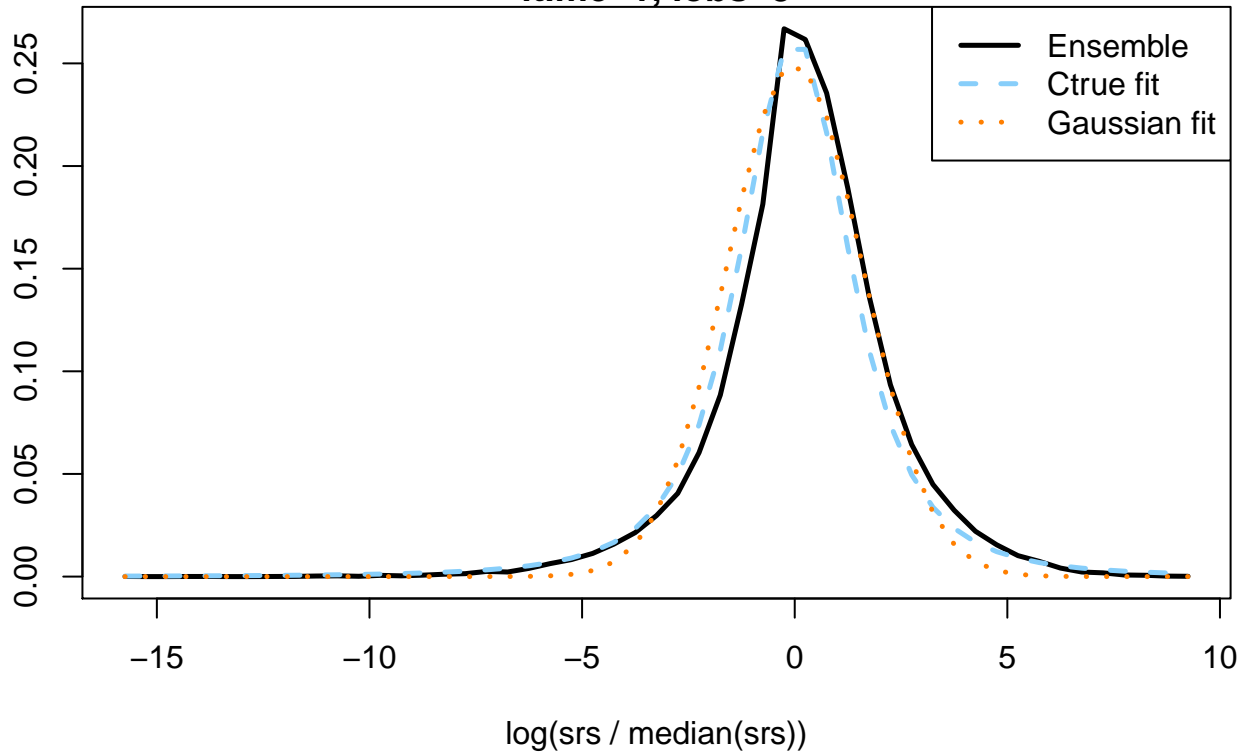

itime=1, iobs=9

density

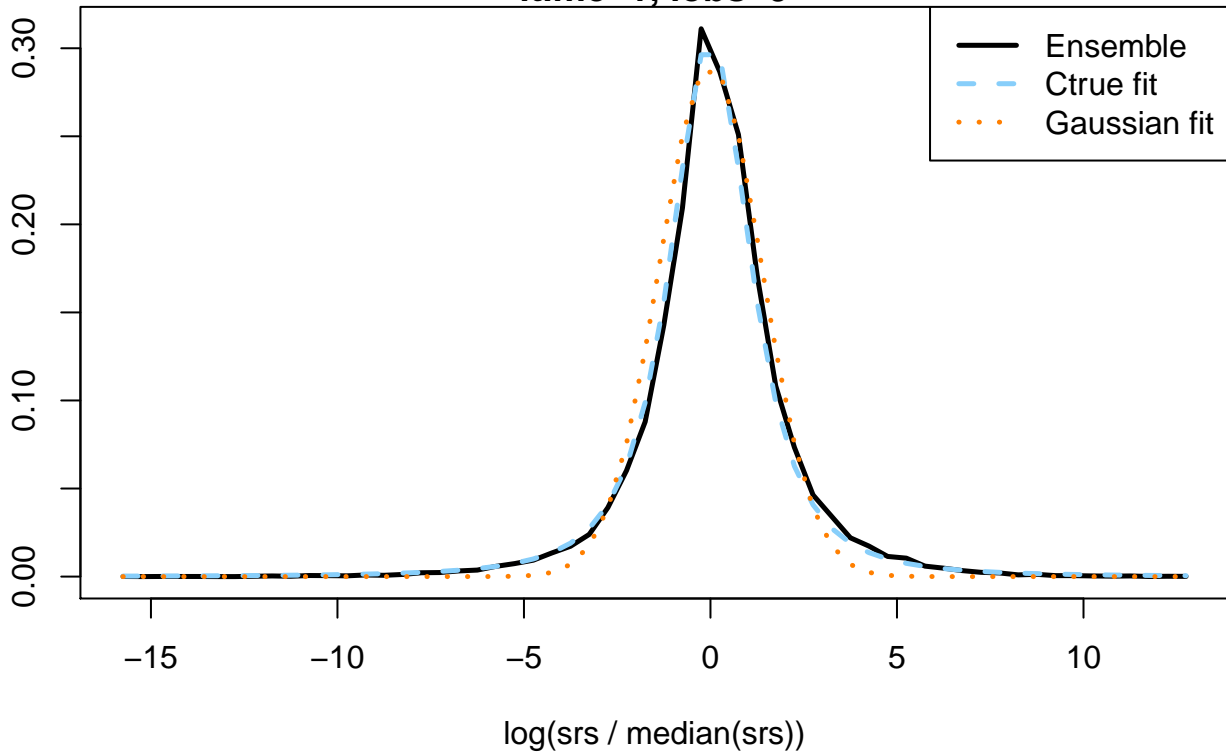

itime=20, iobs=10

density

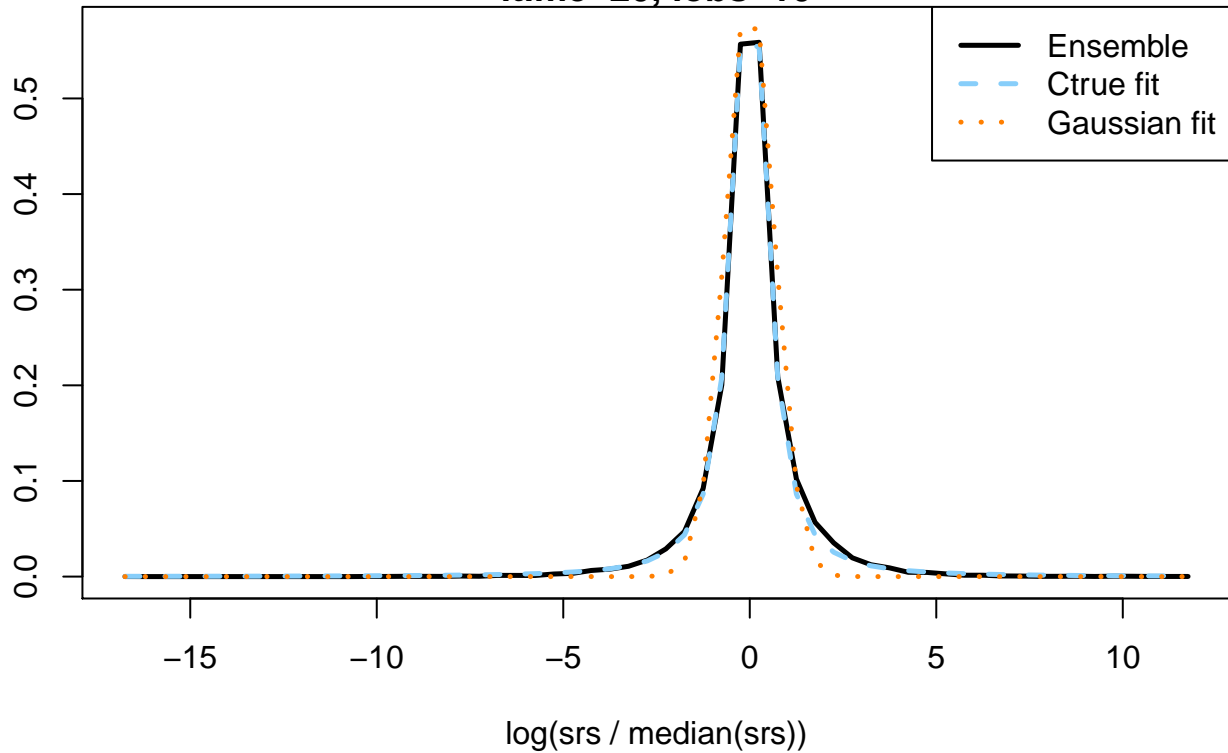

— Ensemble  
- - Ctrue fit  
... Gaussian fit

itime=20, iobs=11

density

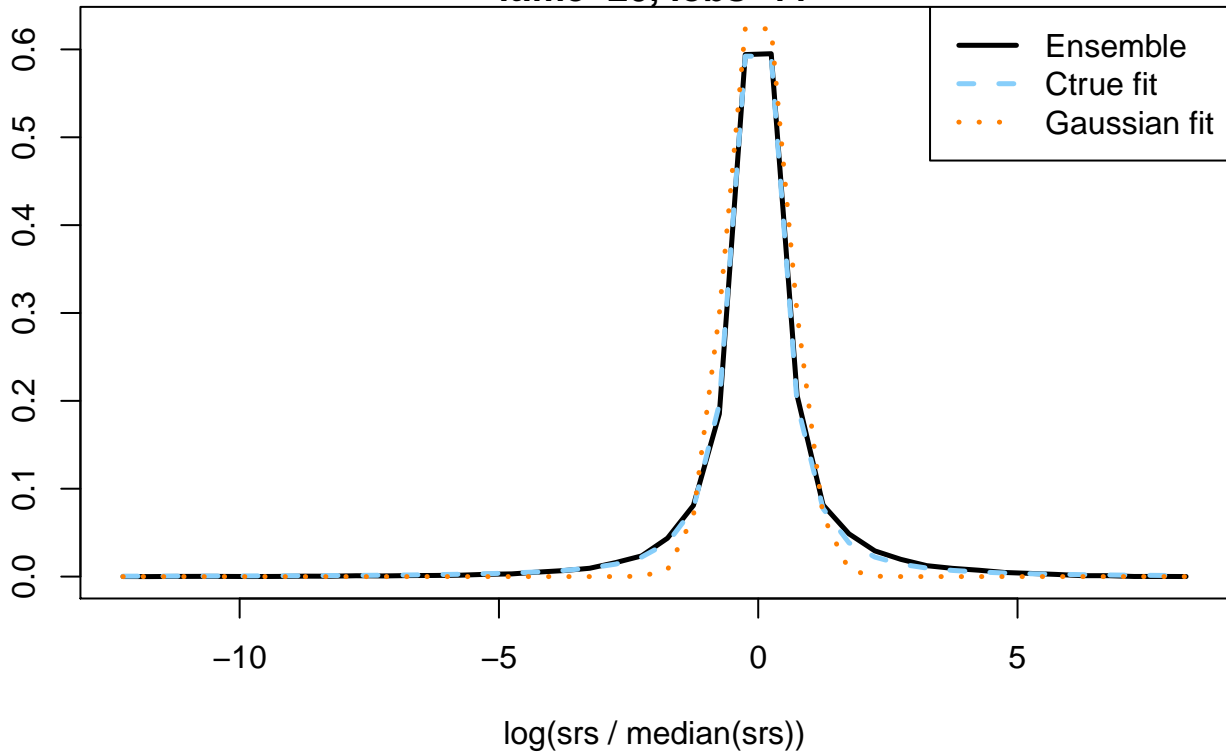

itime=20, iobs=12

density

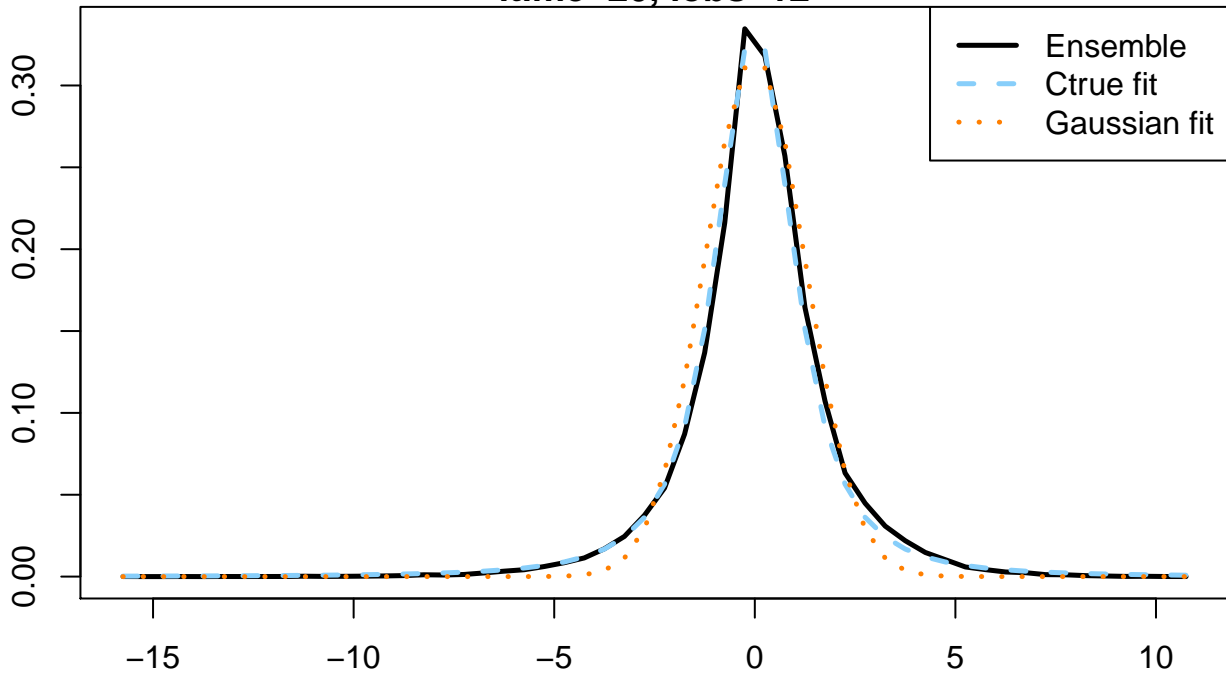

— Ensemble  
- - Ctrue fit  
... Gaussian fit

$\log(\text{srs} / \text{median}(\text{srs}))$



itime=20, iobs=1

density

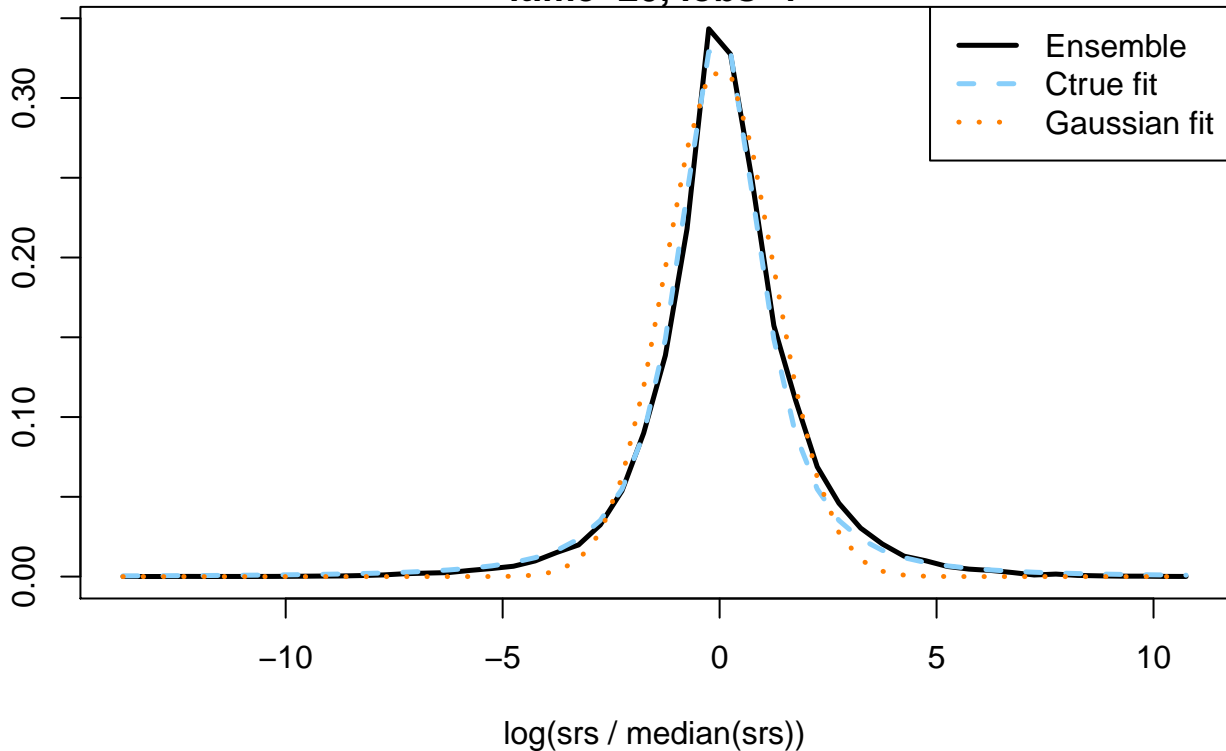

itime=20, iobs=2

density

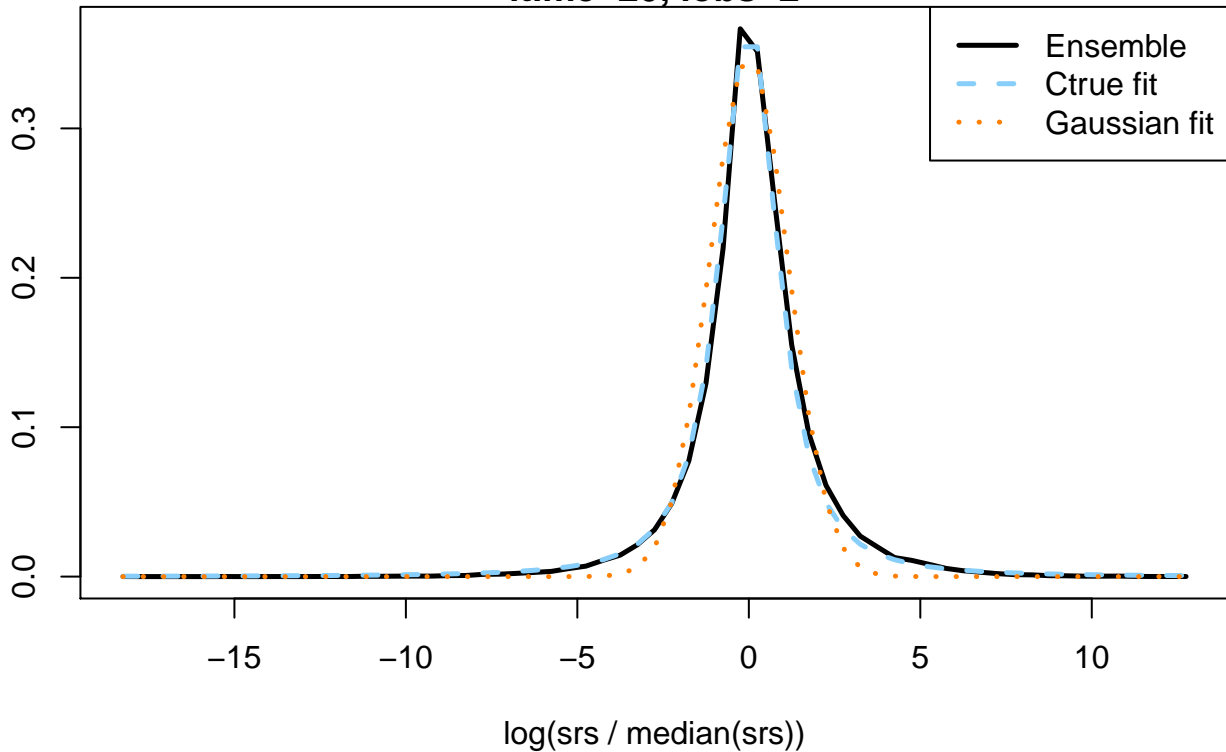

itime=20, iobs=3

density

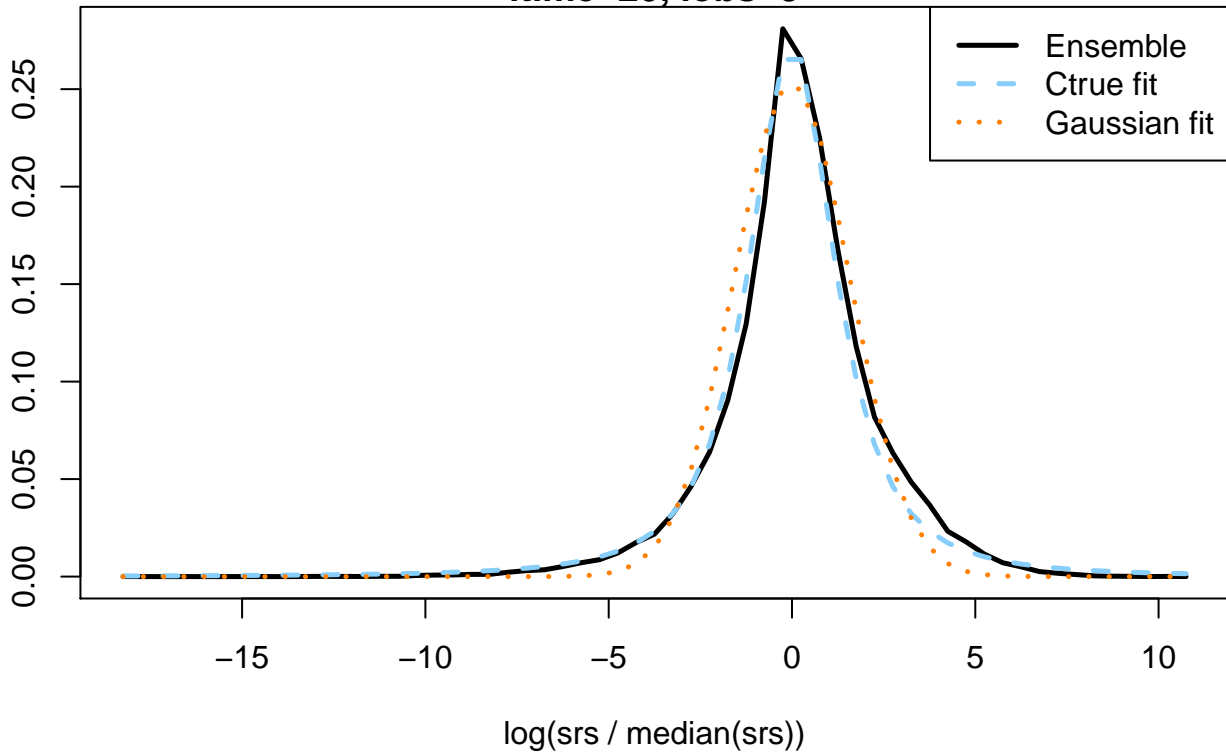

itime=20, iobs=4

density

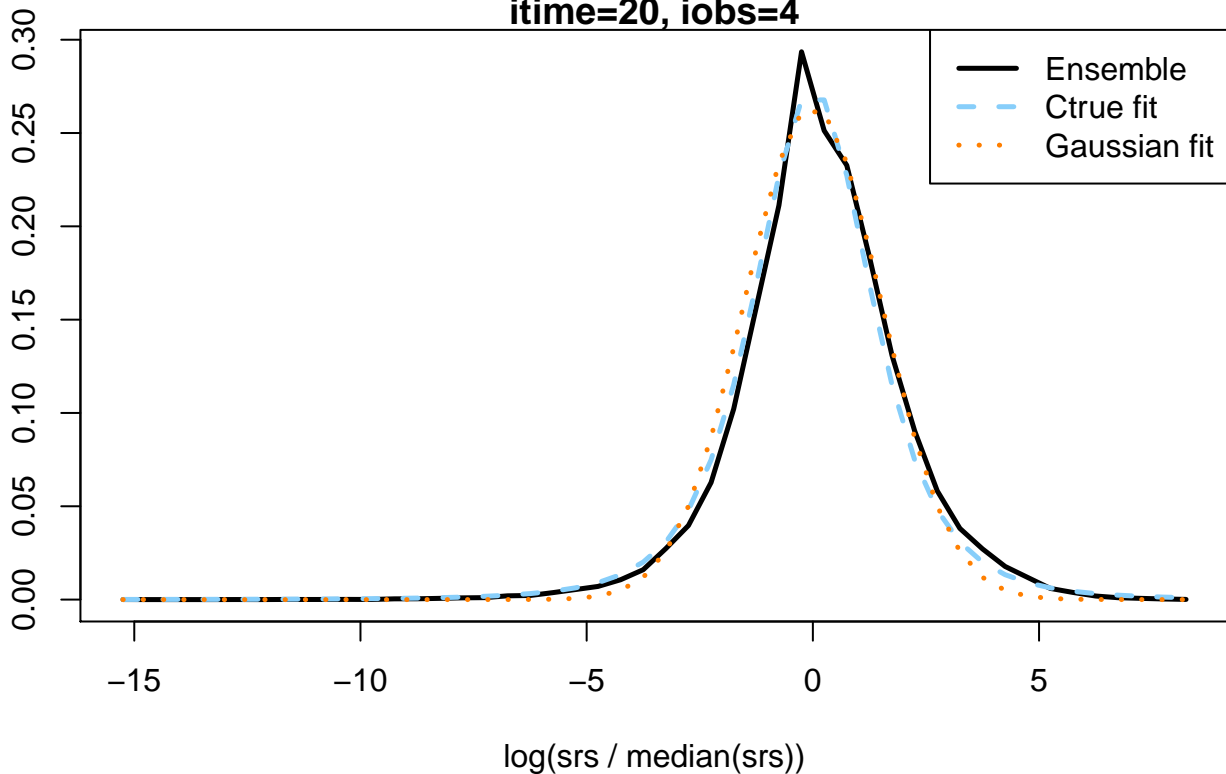

itime=20, iobs=5

density

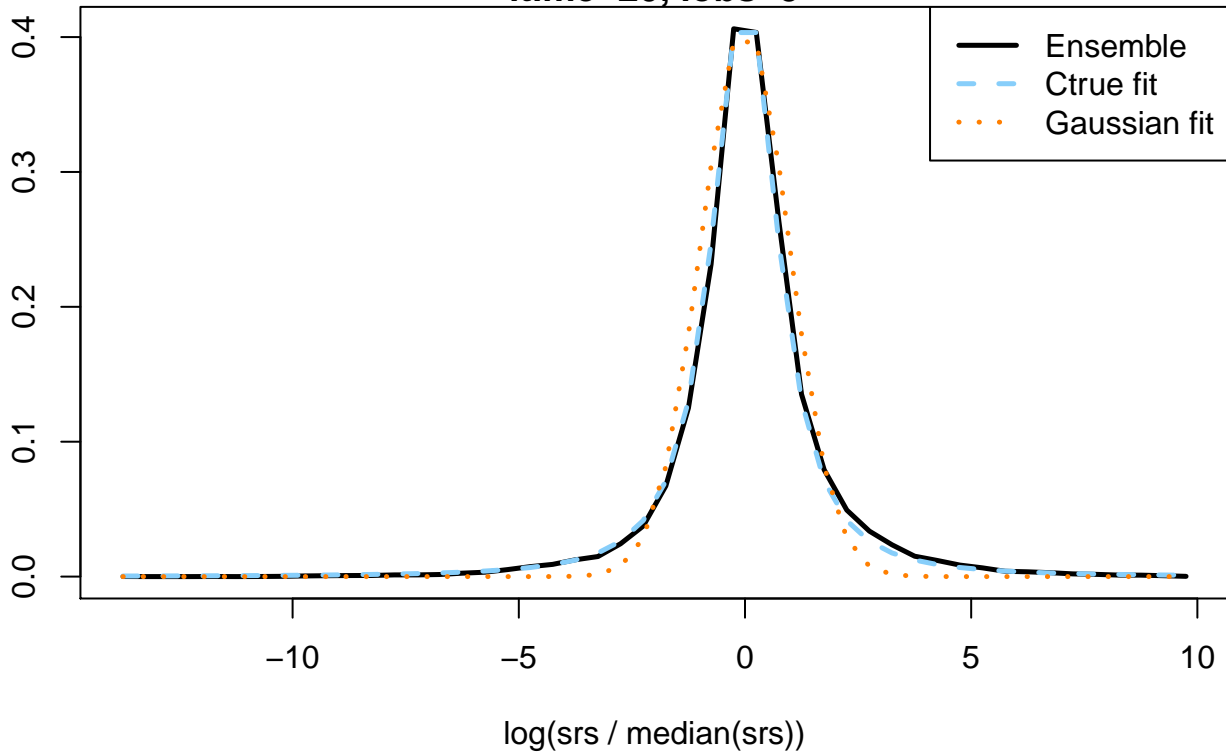

itime=20, iobs=6

density

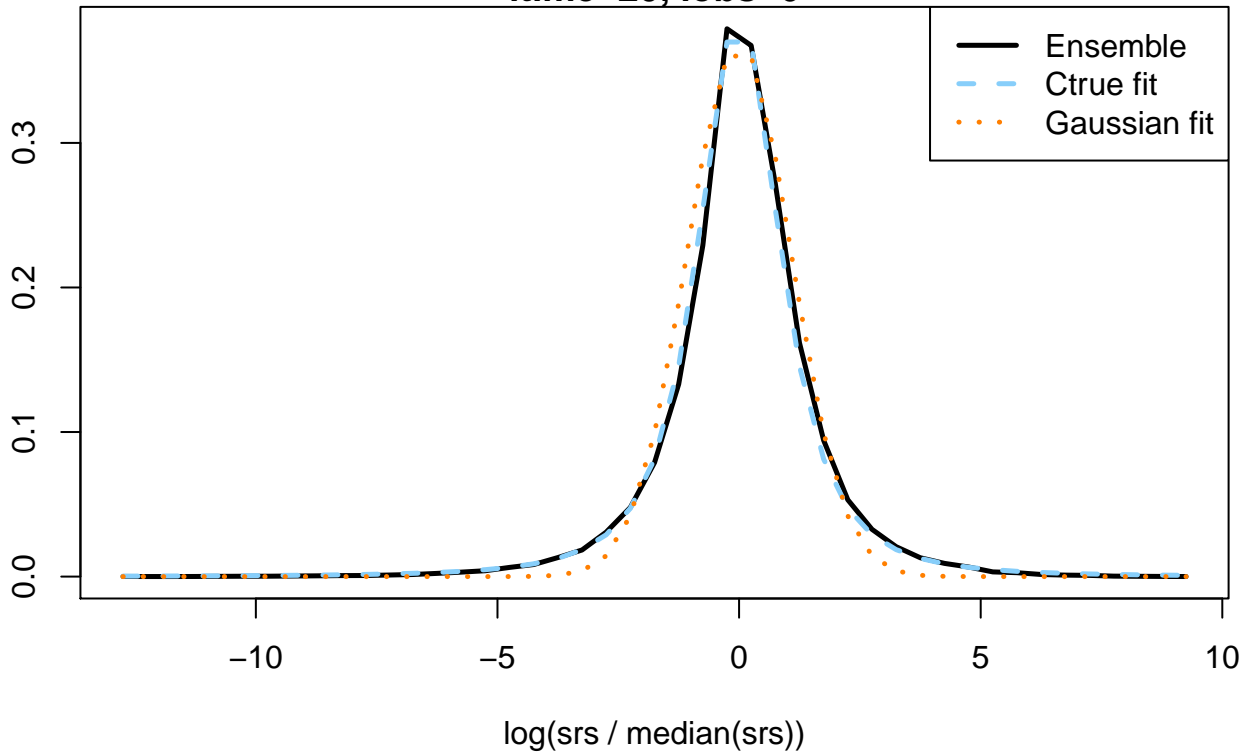

— Ensemble  
- - Ctrue fit  
... Gaussian fit

itime=20, iobs=7

density

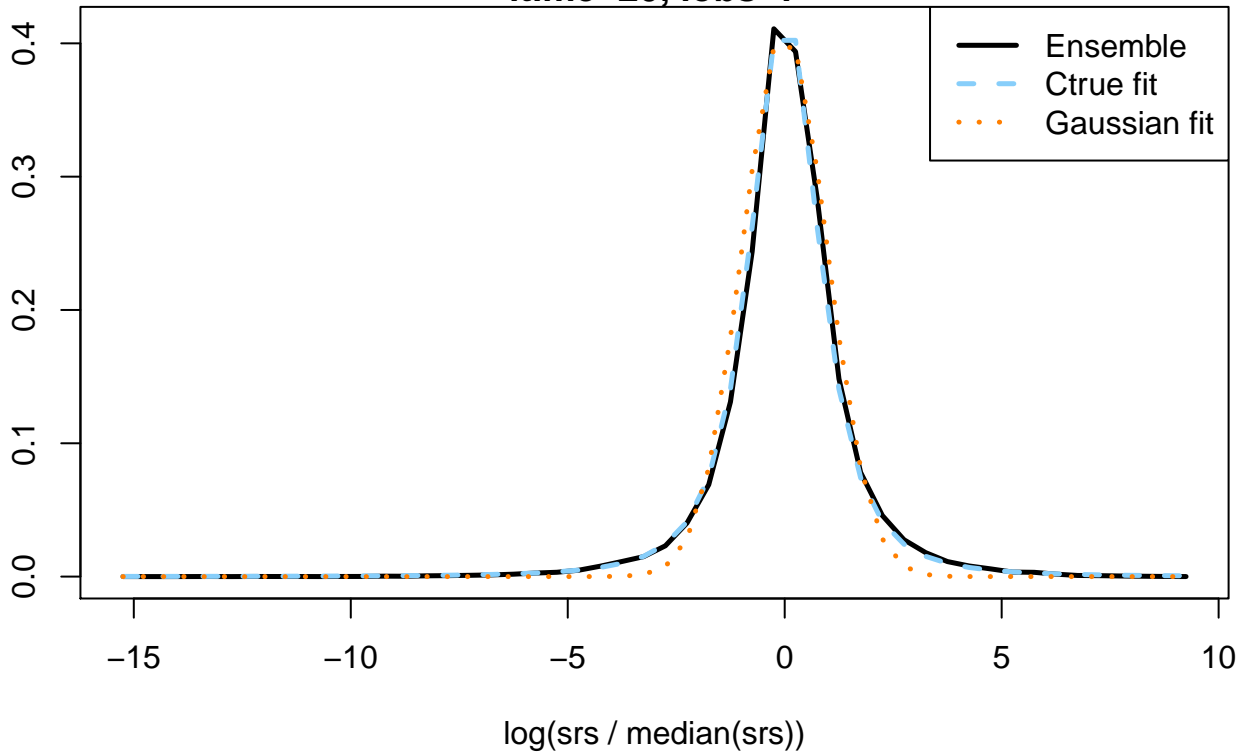

— Ensemble  
- - Ctrue fit  
... Gaussian fit

itime=20, iobs=8

density

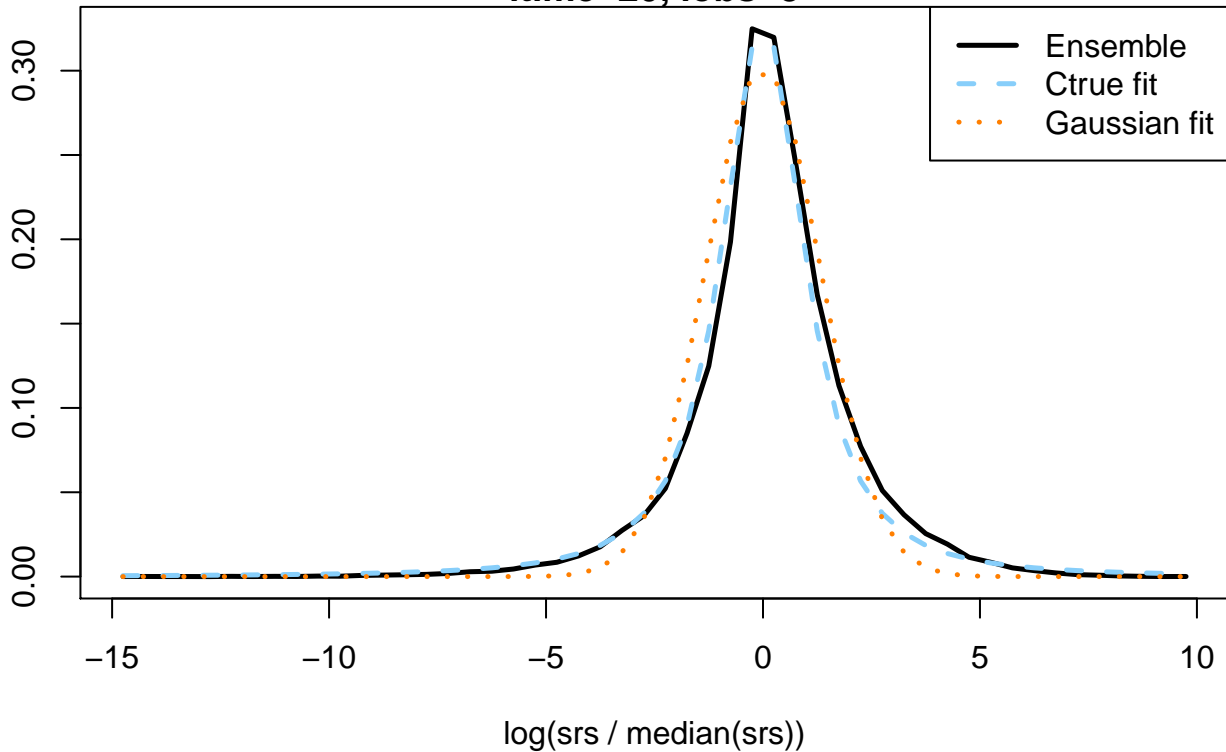

— Ensemble  
- - Ctrue fit  
... Gaussian fit



itime=20, iobs=9

density

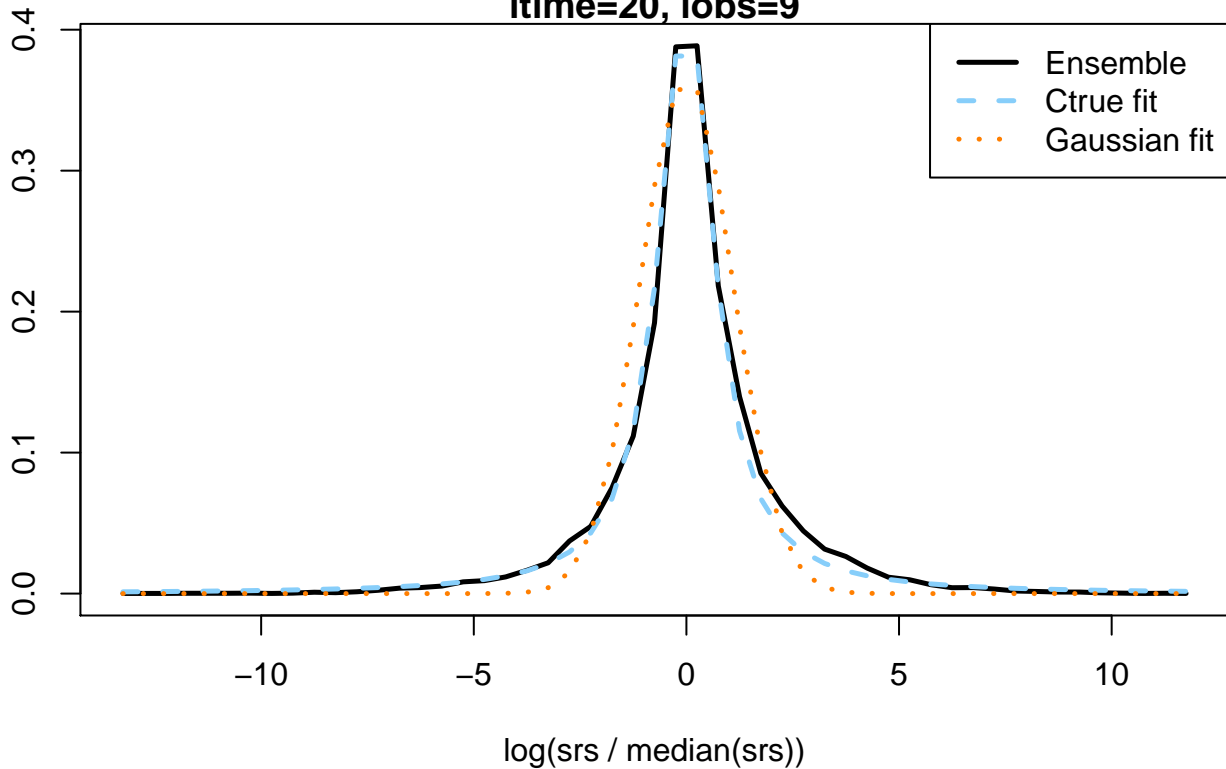

itime=21, iobs=10

density

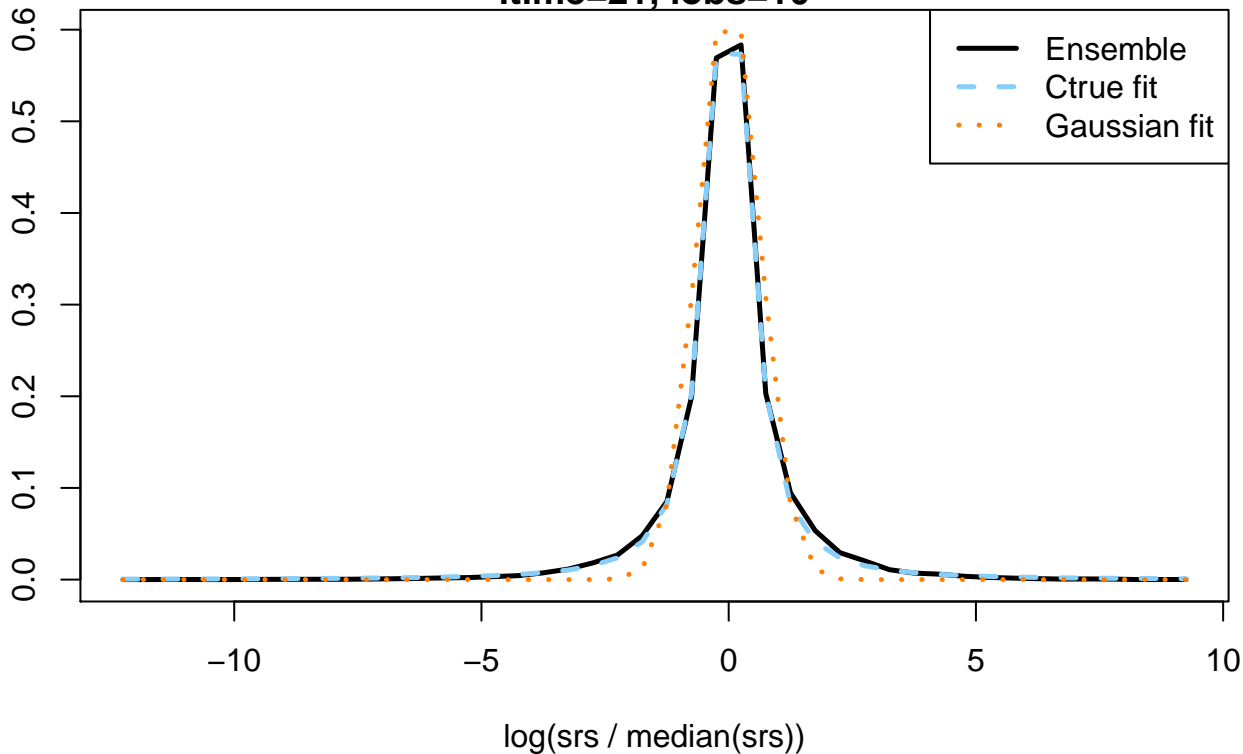

itime=21, iobs=11

density

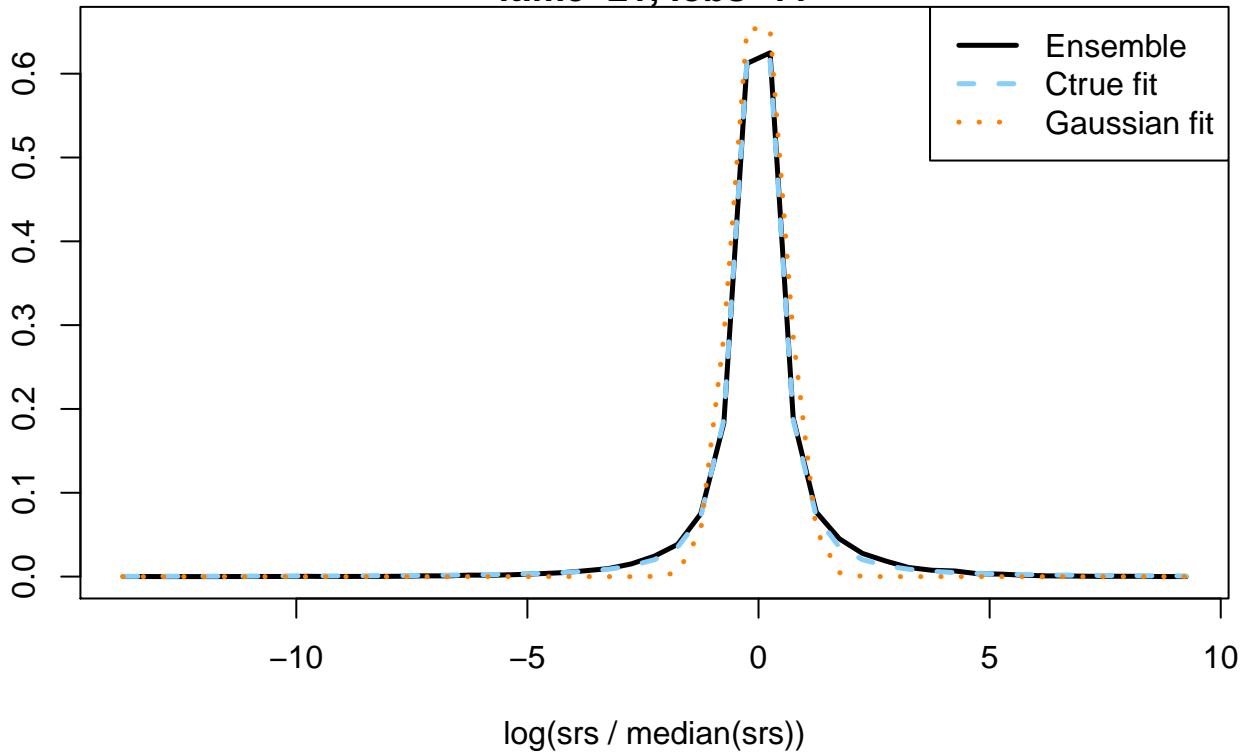

itime=21, iobs=12

density

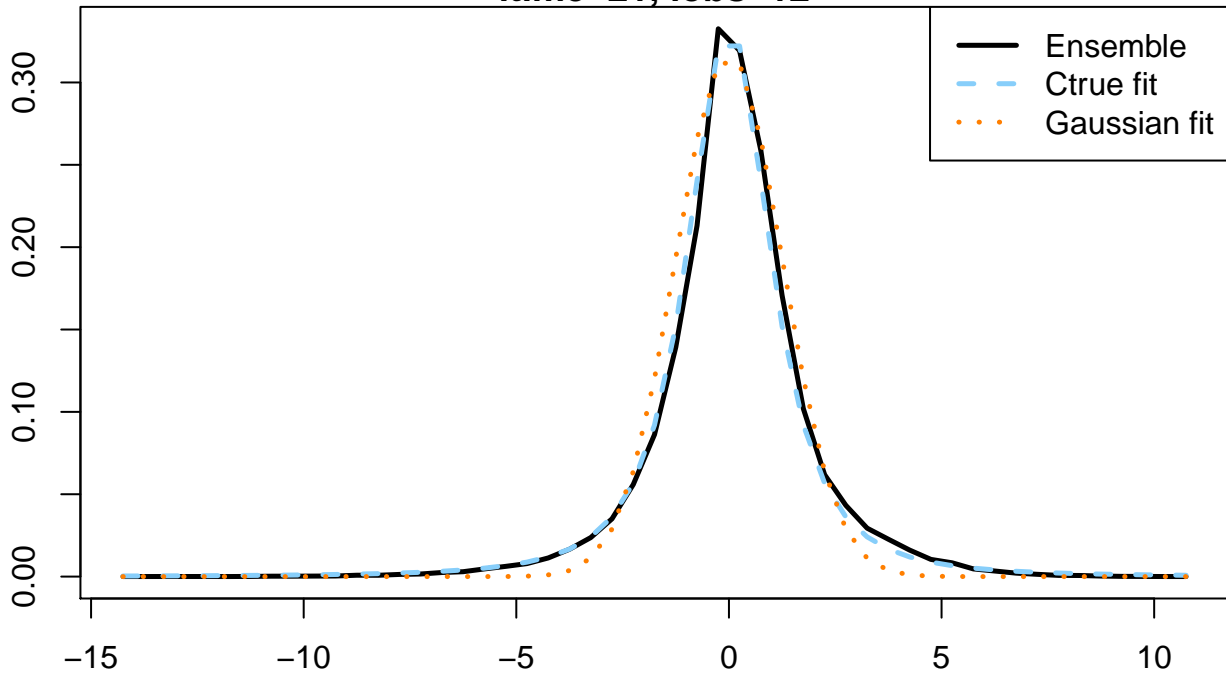

$\log(\text{srs} / \text{median}(\text{srs}))$

itime=21, iobs=1

density

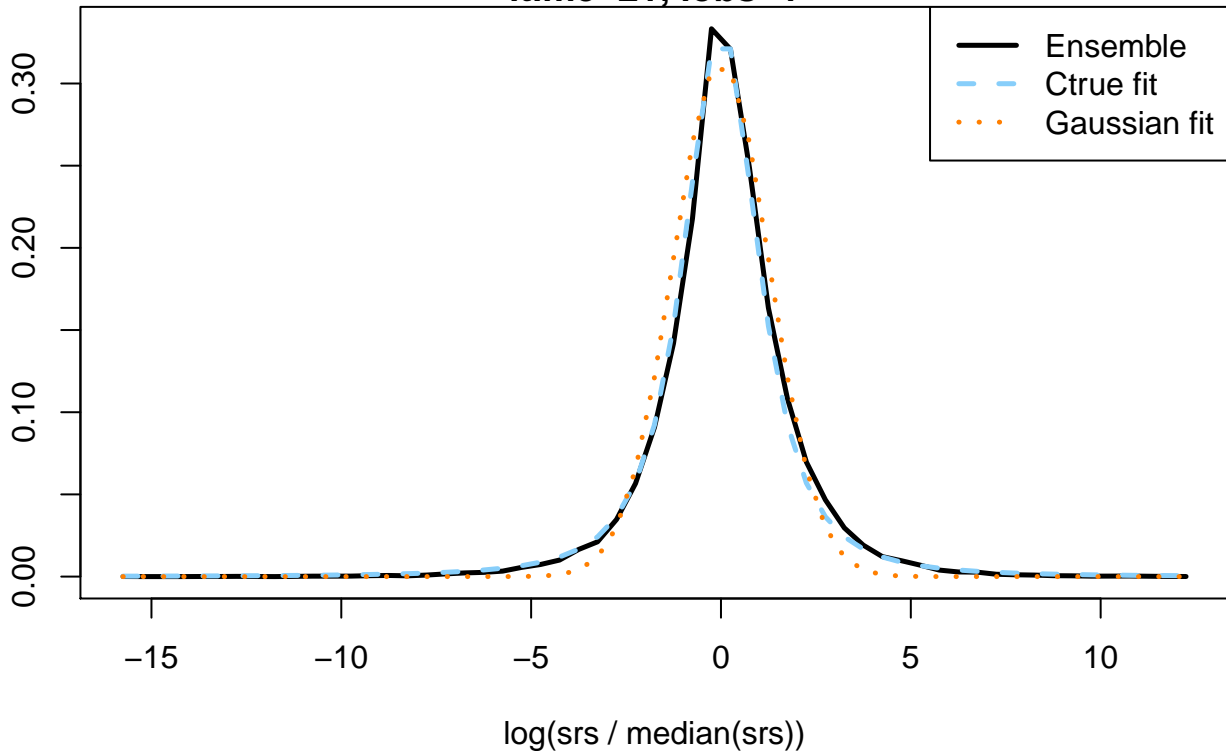

— Ensemble  
- - Ctrue fit  
... Gaussian fit

itime=21, iobs=2

density

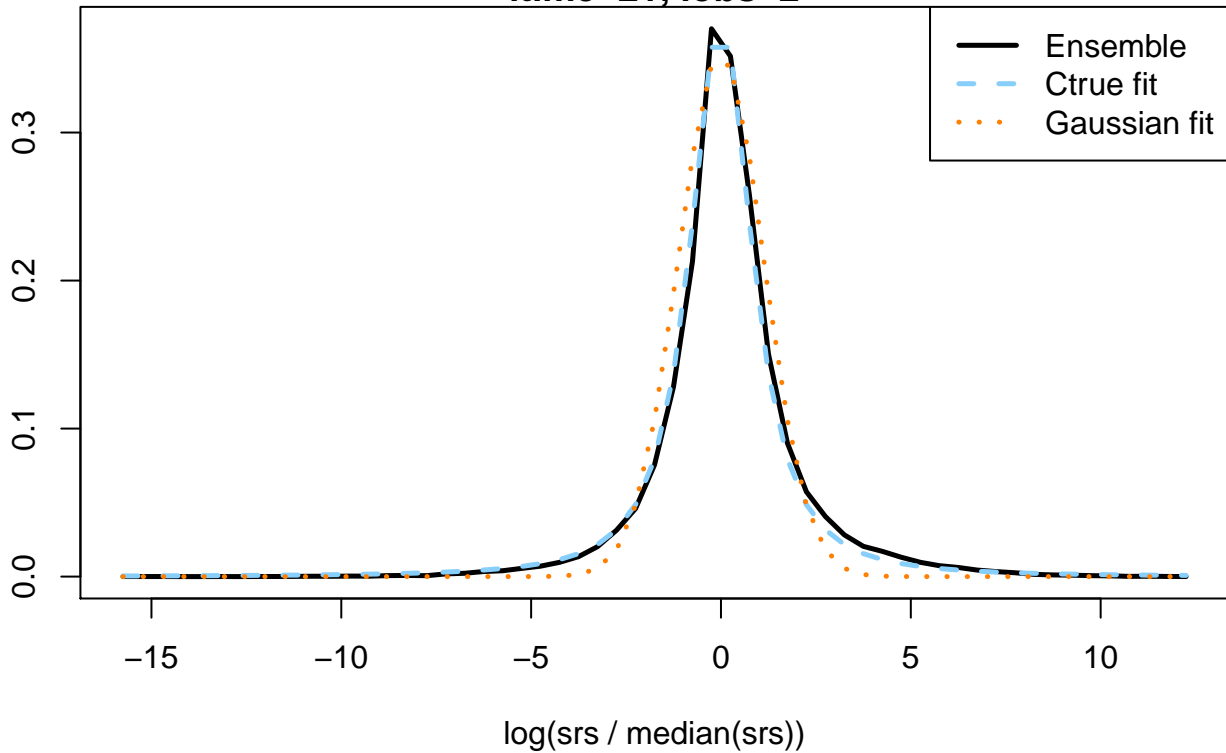

— Ensemble  
- - Ctrue fit  
... Gaussian fit

itime=21, iobs=3

density

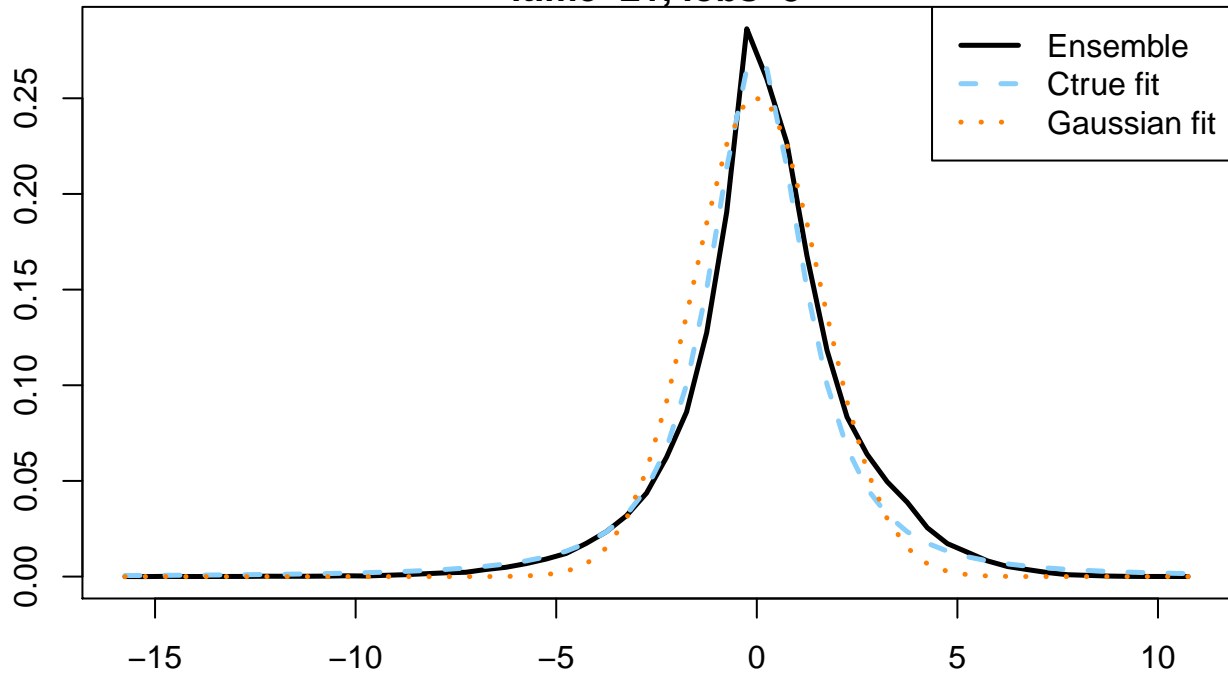

log(srs / median(srs))

itime=21, iobs=4

density

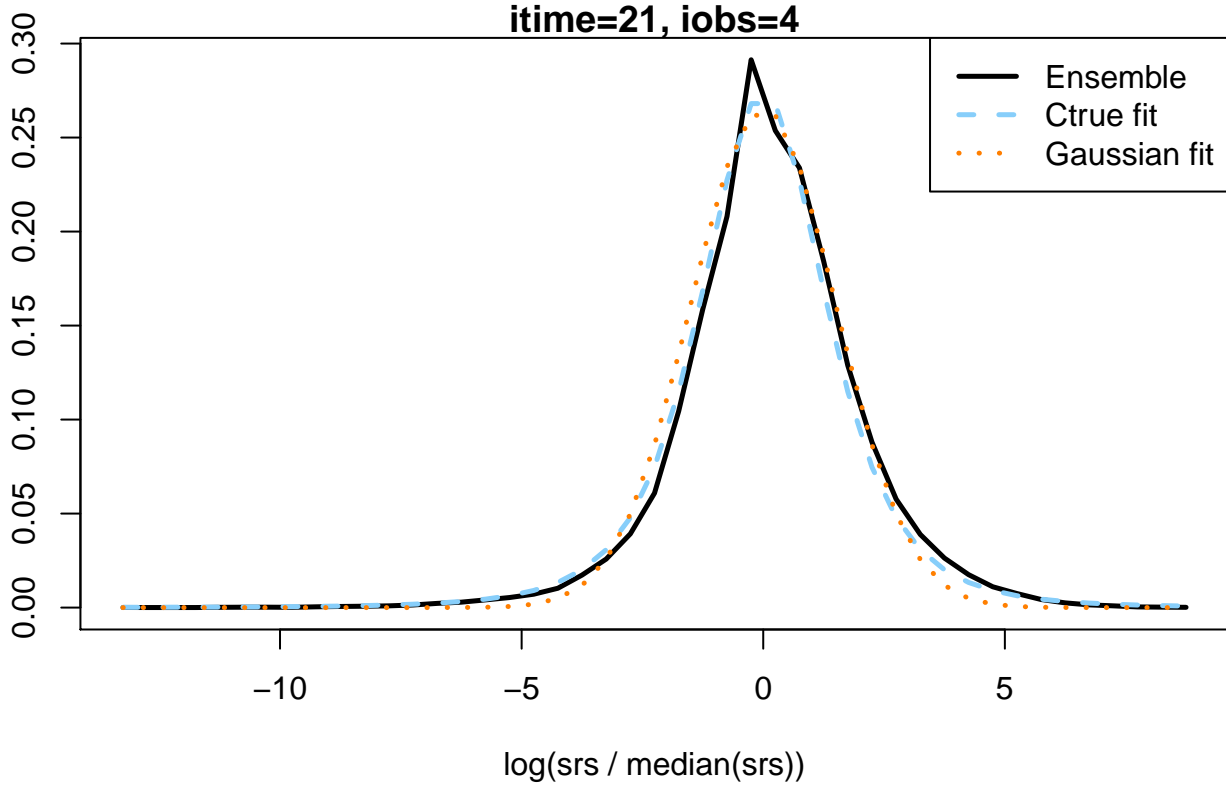

— Ensemble  
- - Ctrue fit  
... Gaussian fit

-10

-5

0

5

$\log(\text{srs} / \text{median}(\text{srs}))$



itime=21, iobs=5

density

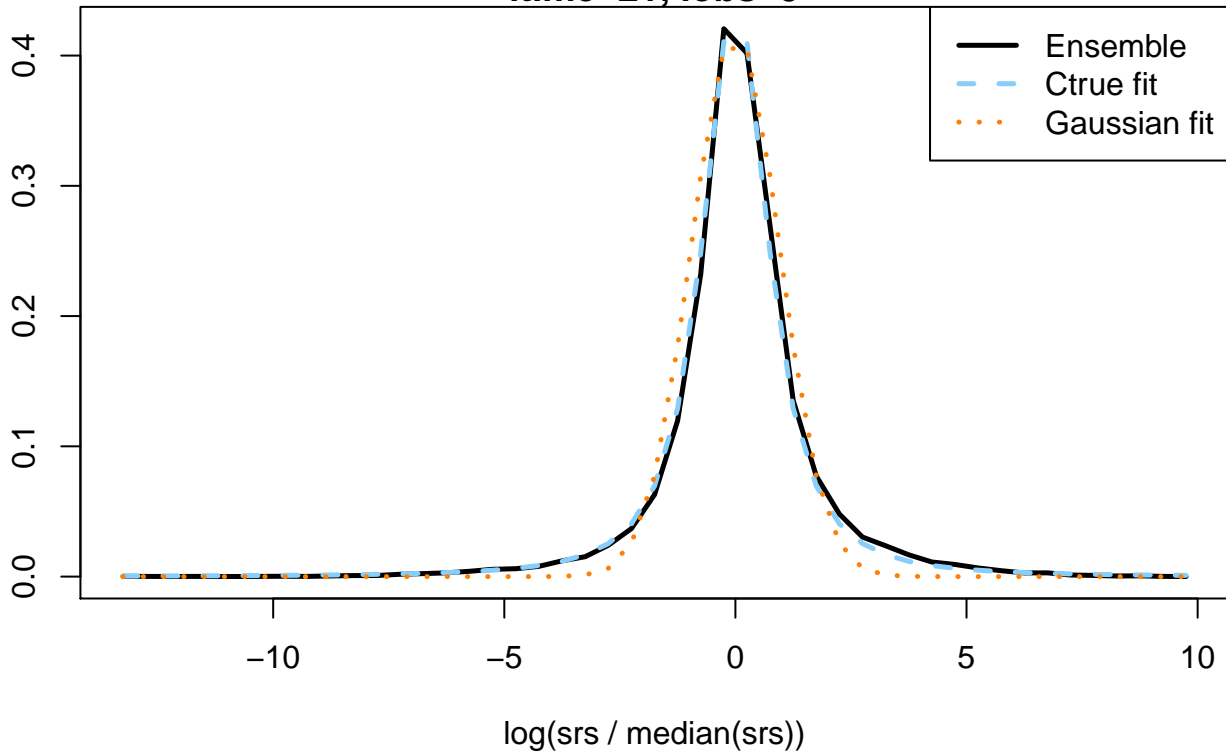

— Ensemble  
- - Ctrue fit  
... Gaussian fit

itime=21, iobs=6

density

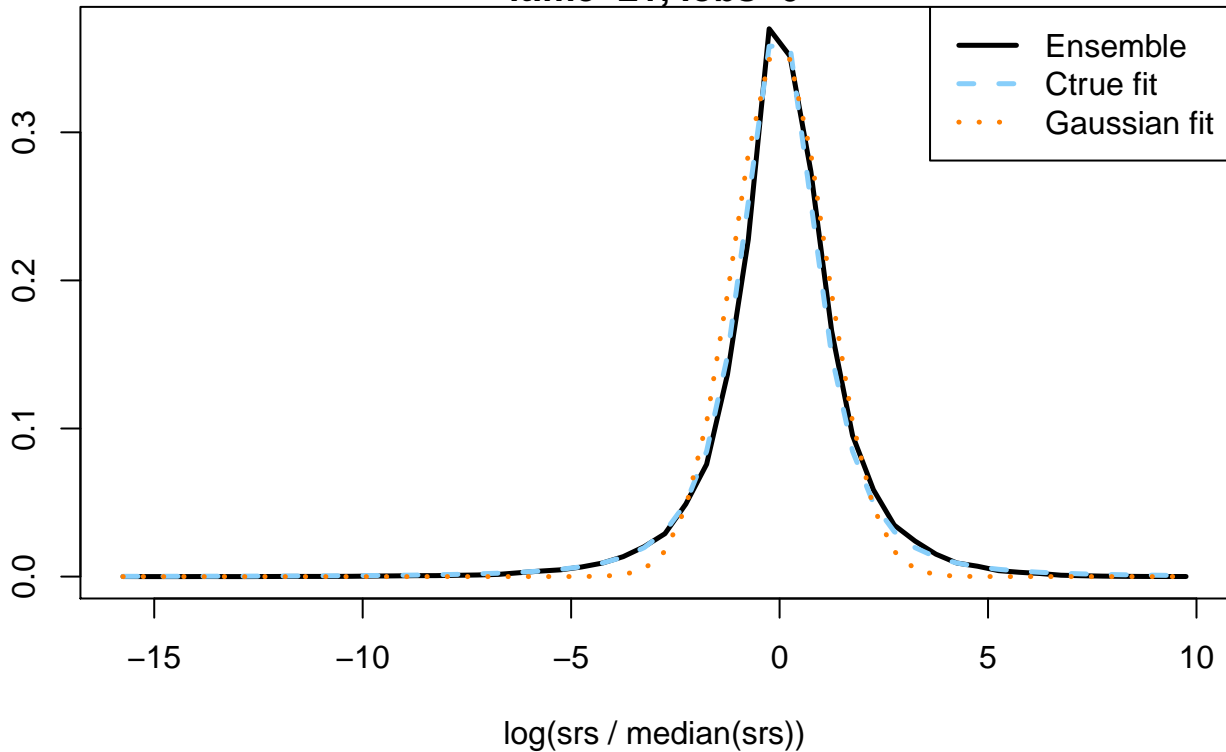

— Ensemble  
- - Ctrue fit  
... Gaussian fit

itime=21, iobs=7

density

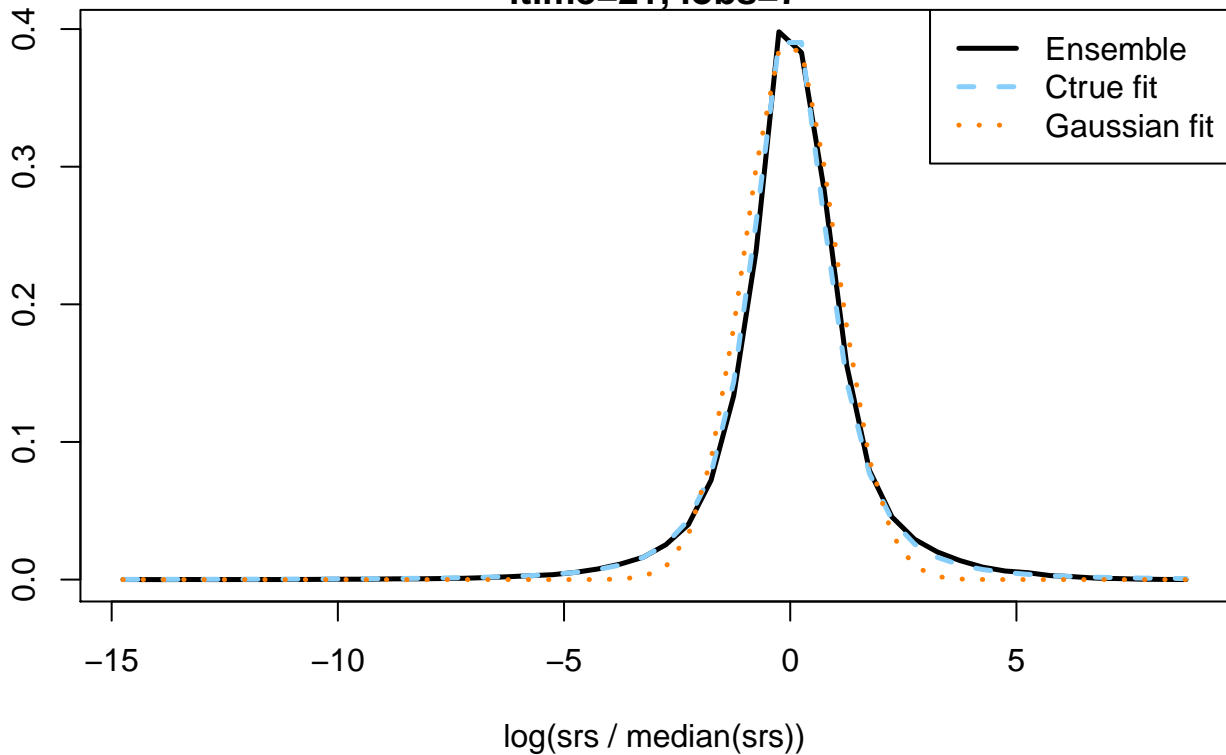

itime=21, iobs=8

density

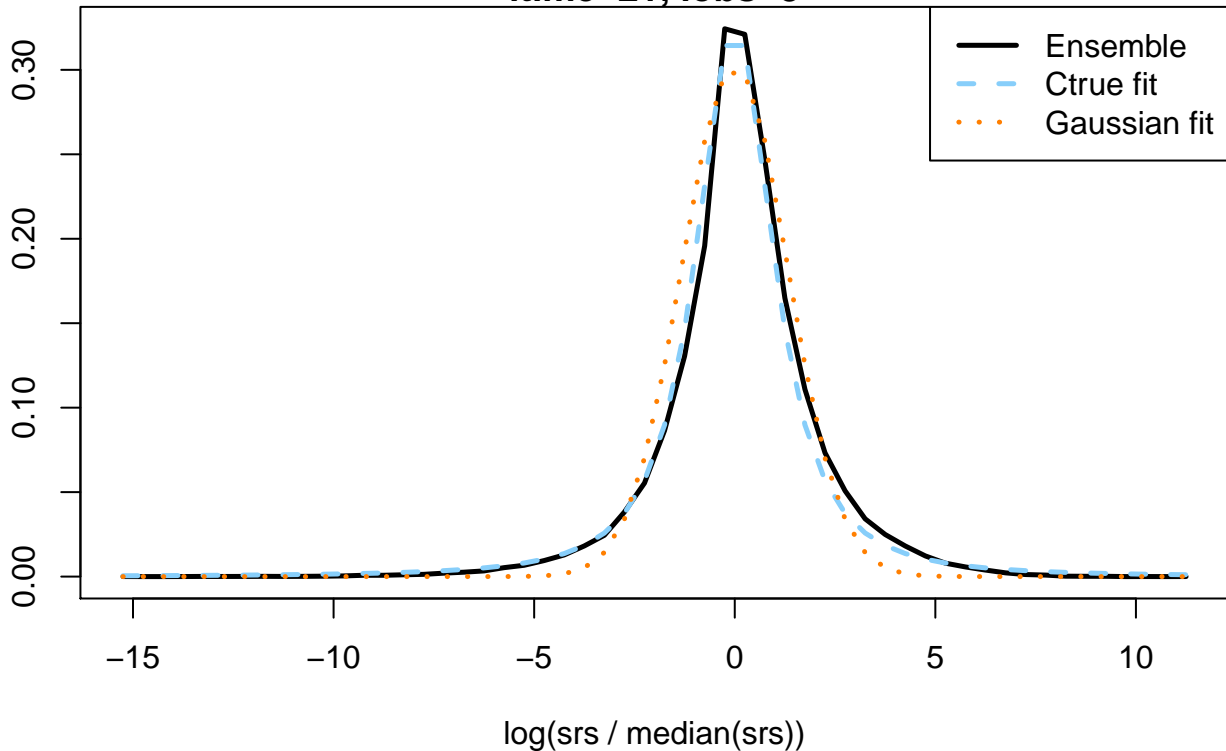

— Ensemble  
- - Ctrue fit  
... Gaussian fit

itime=21, iobs=9

density

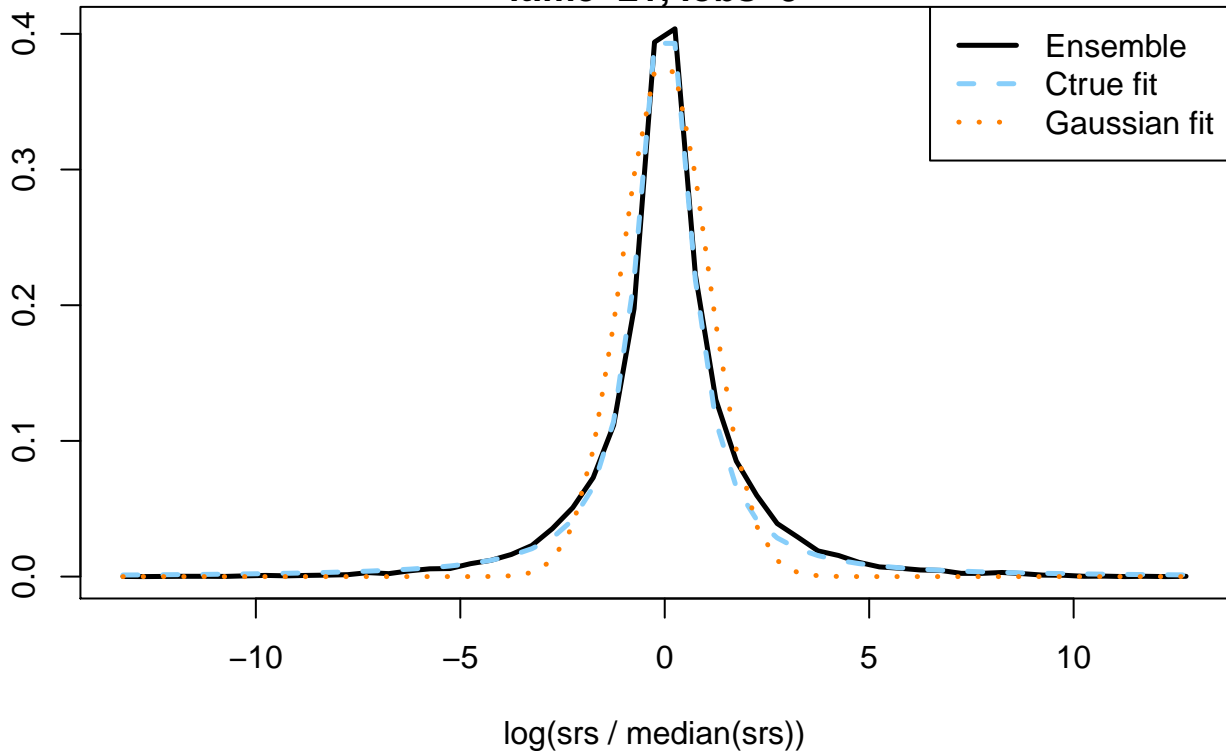

itime=22, iobs=10

density

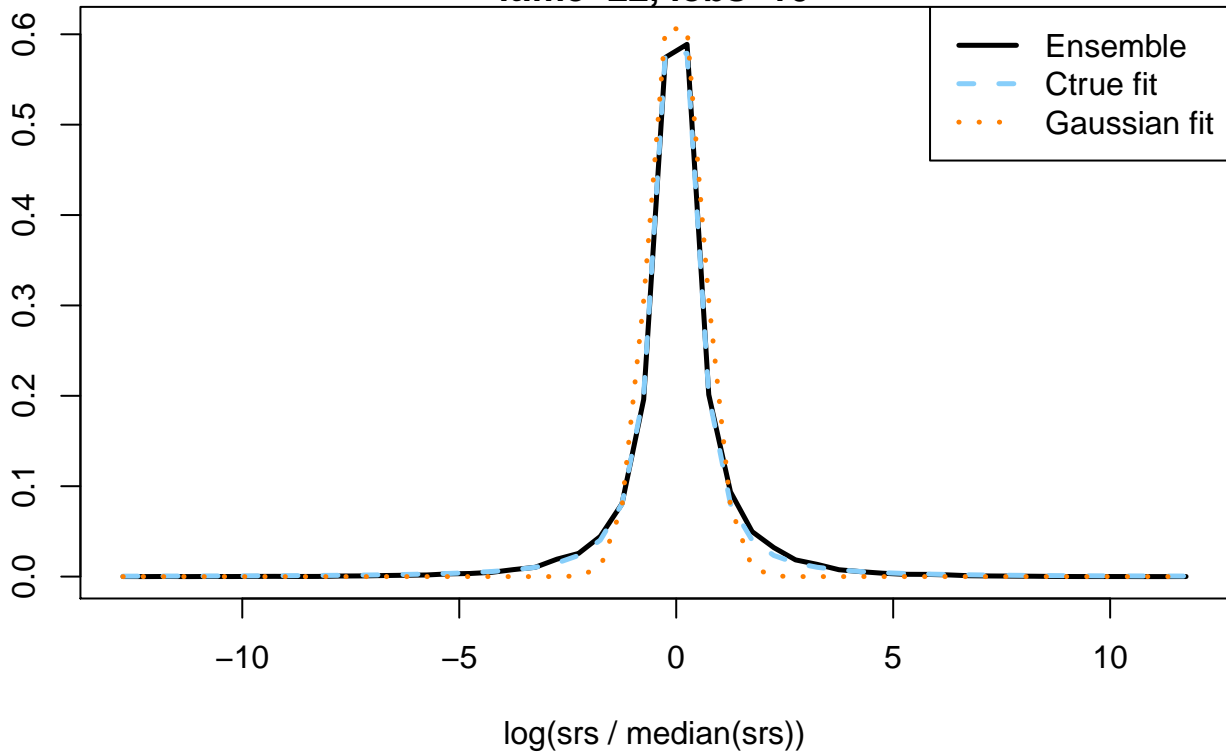

itime=22, iobs=11

density

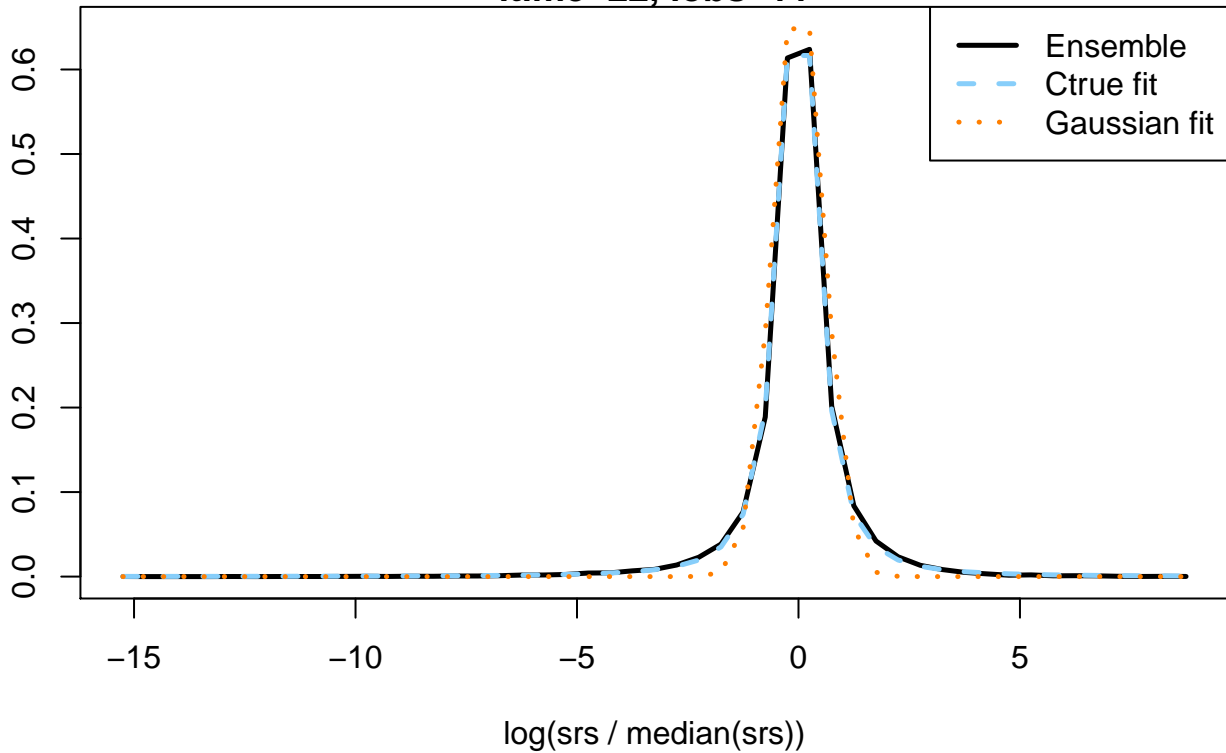

itime=22, iobs=12

density

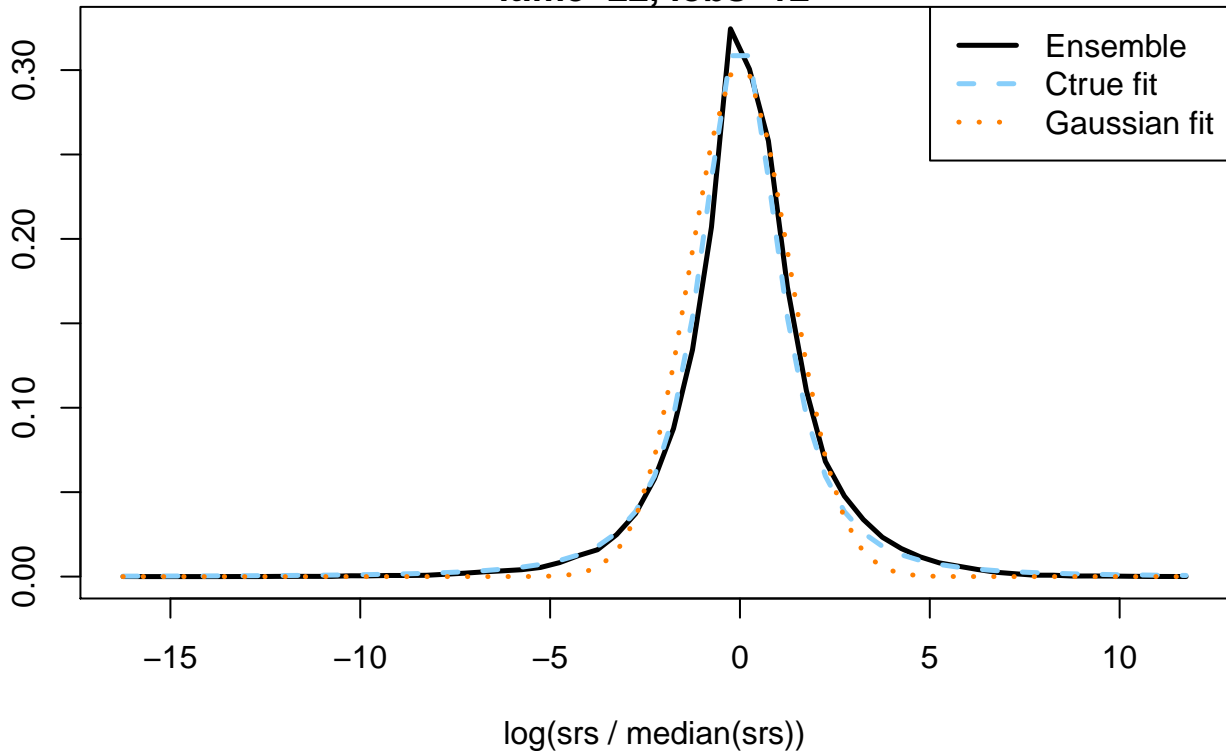

— Ensemble  
- - Ctrue fit  
... Gaussian fit



itime=22, iobs=1

density

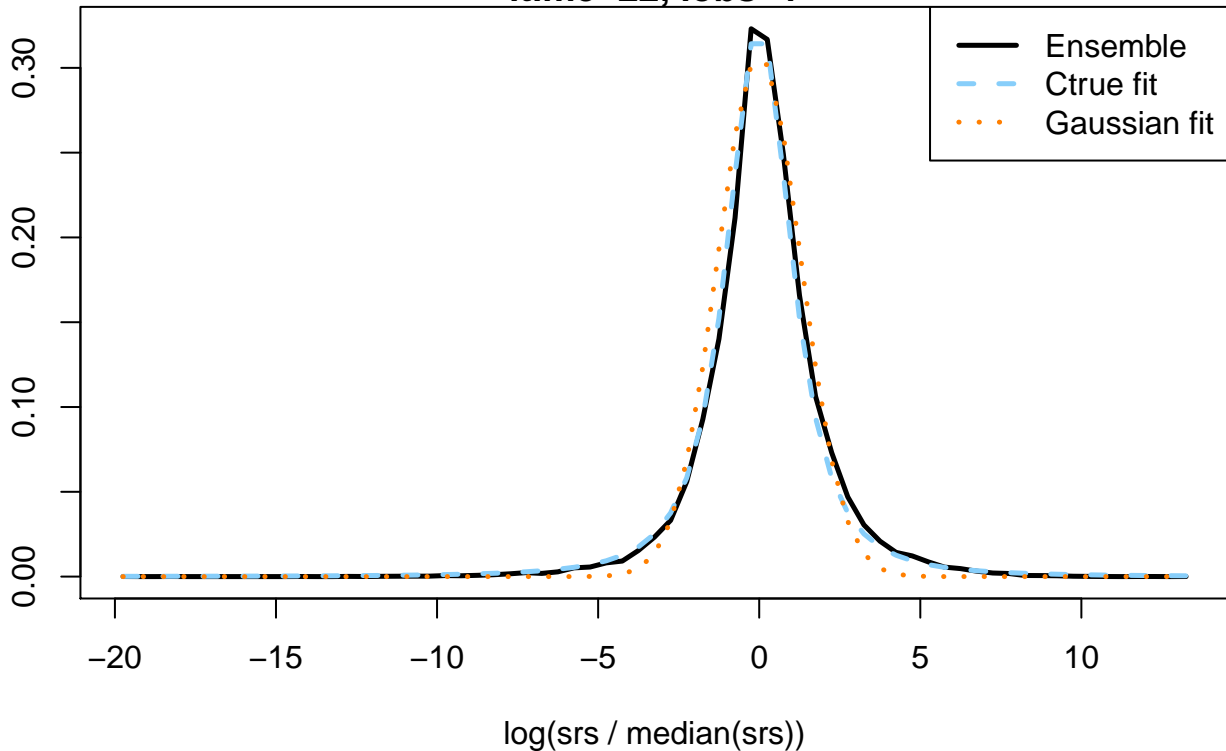

itime=22, iobs=2

density

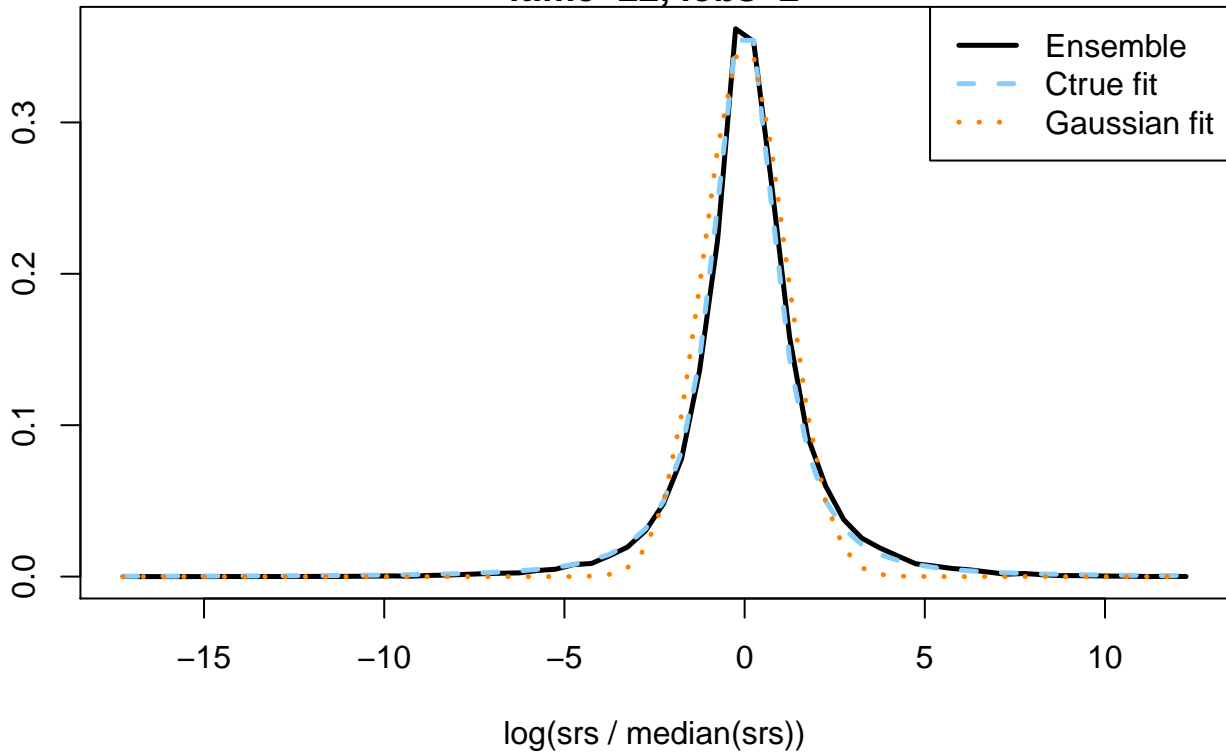

— Ensemble  
- - Ctrue fit  
... Gaussian fit

itime=22, iobs=3

density

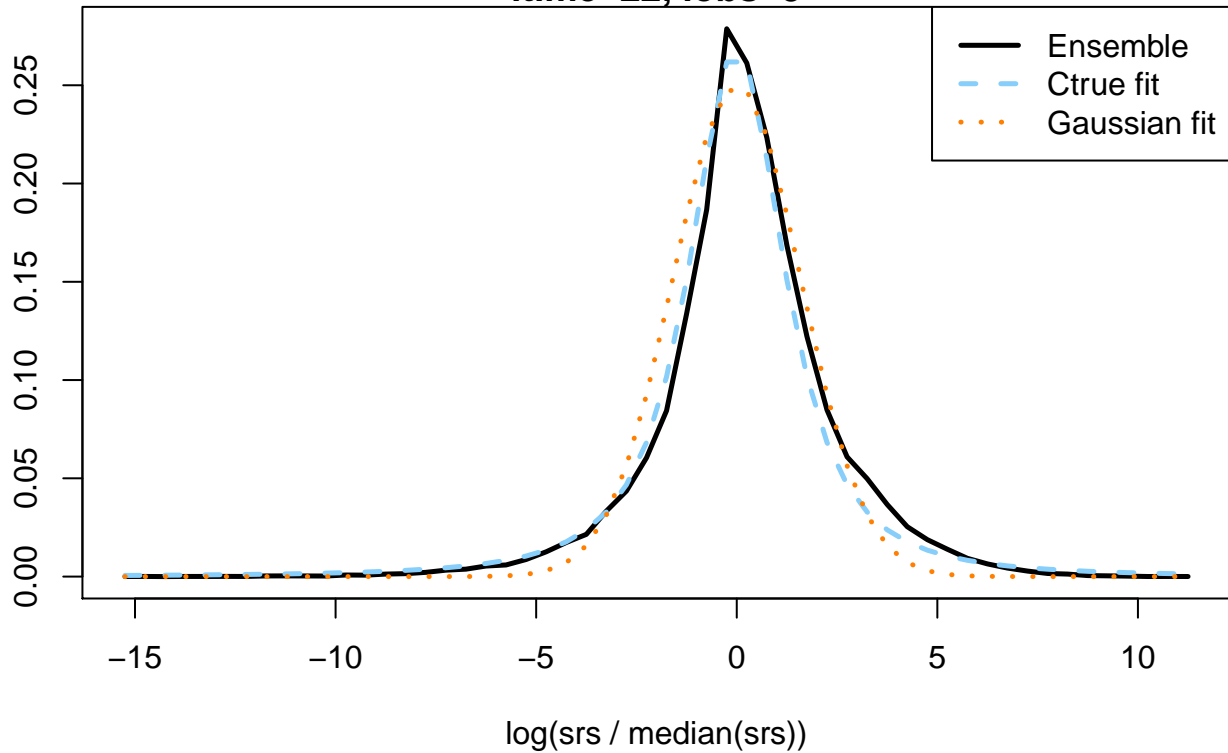

itime=22, iobs=4

density

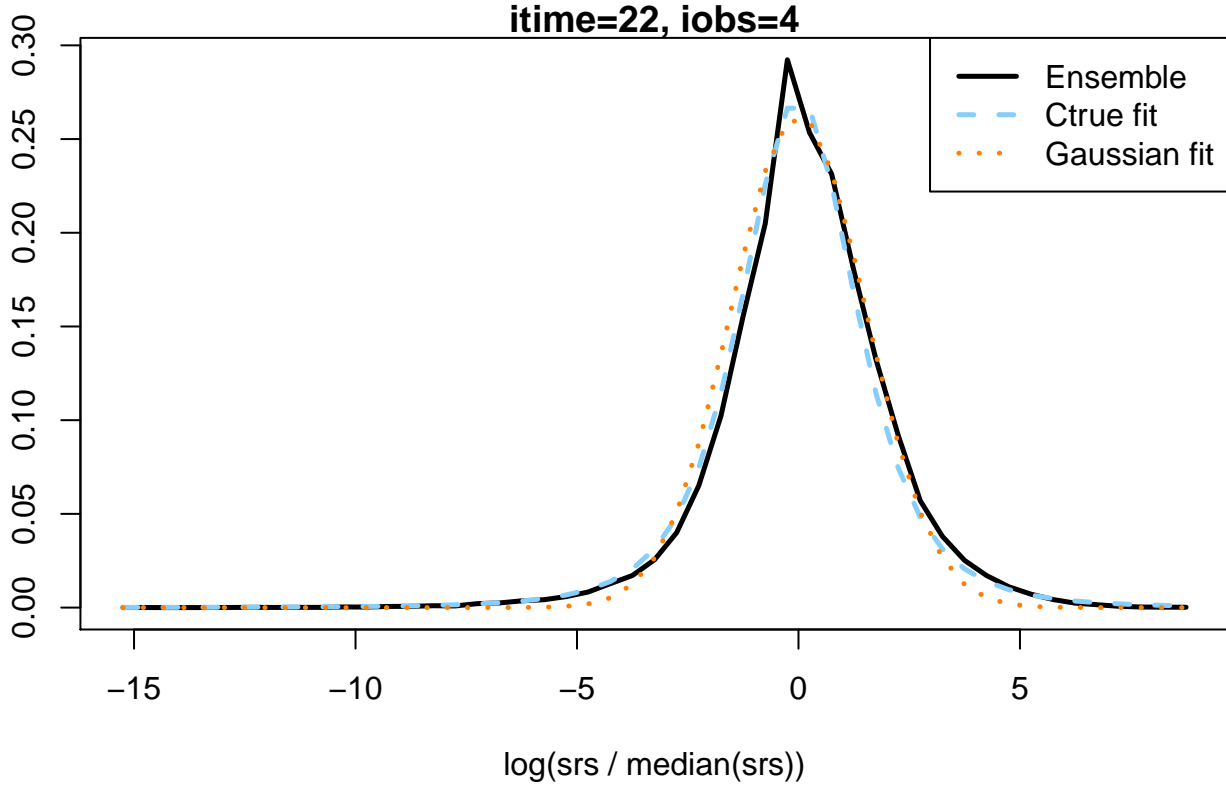

itime=22, iobs=5

density

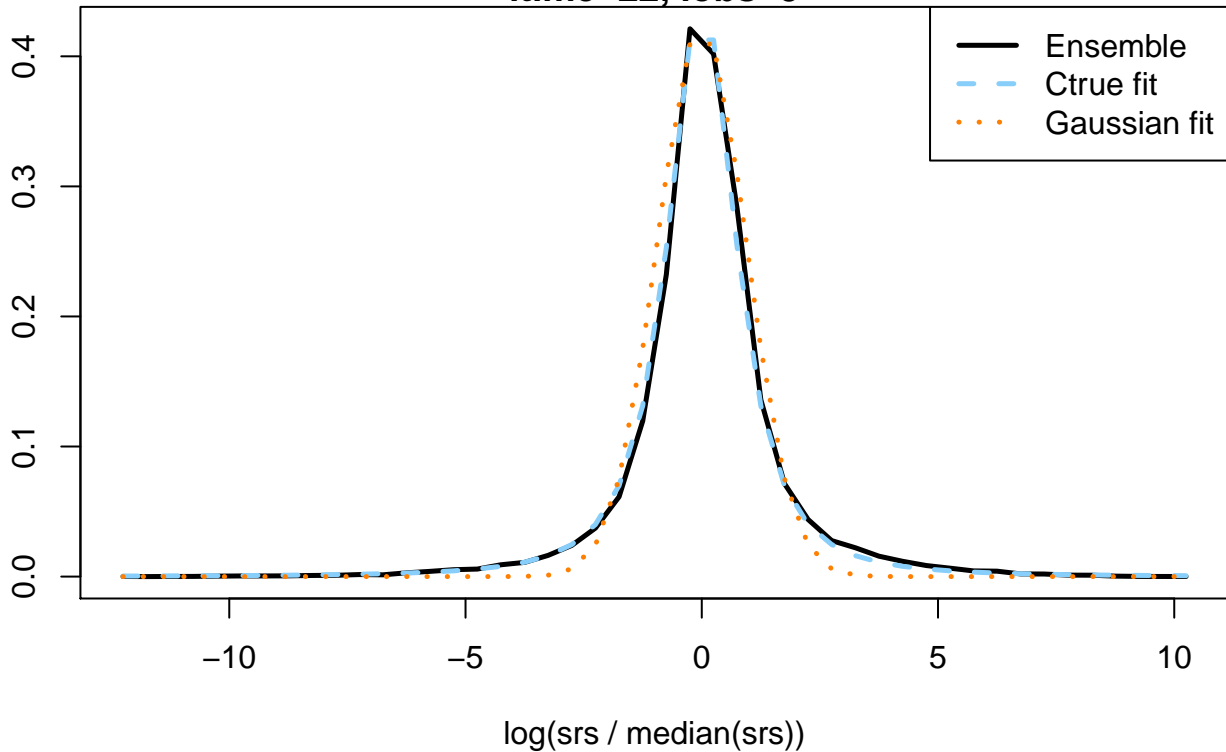

— Ensemble  
- - Ctrue fit  
... Gaussian fit

itime=22, iobs=6

density

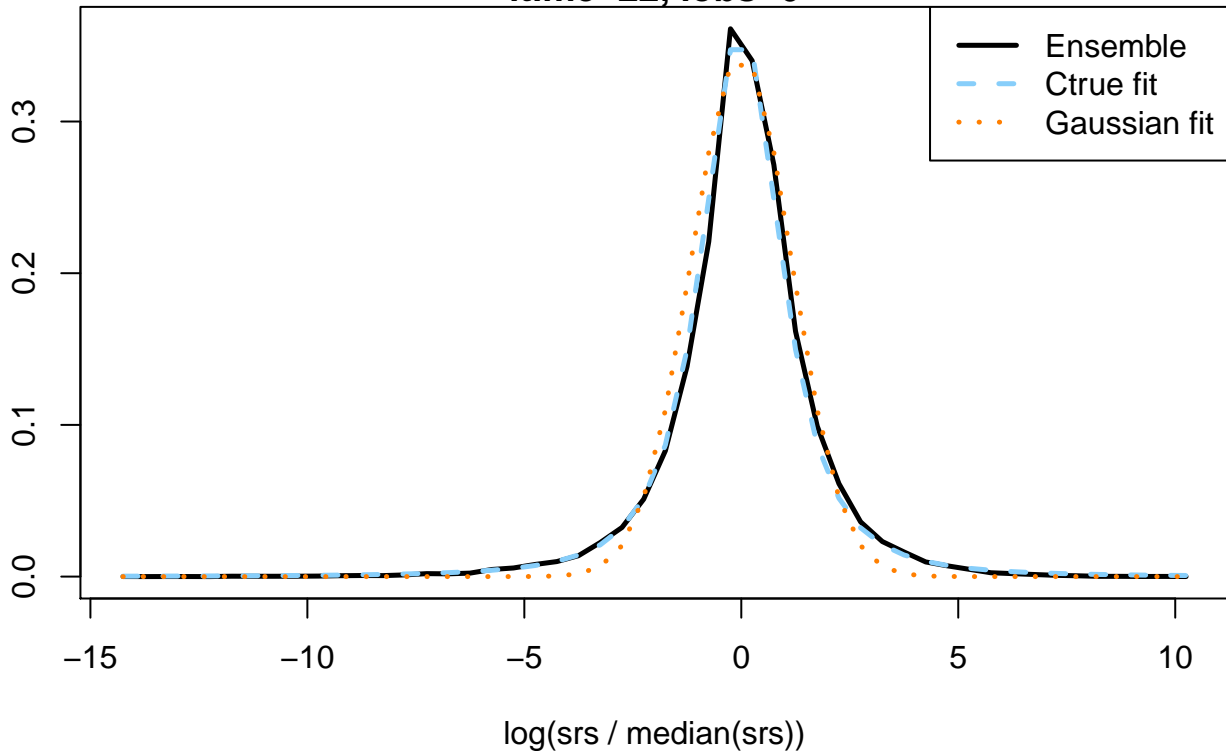

— Ensemble  
- - Ctrue fit  
... Gaussian fit

itime=22, iobs=7

density

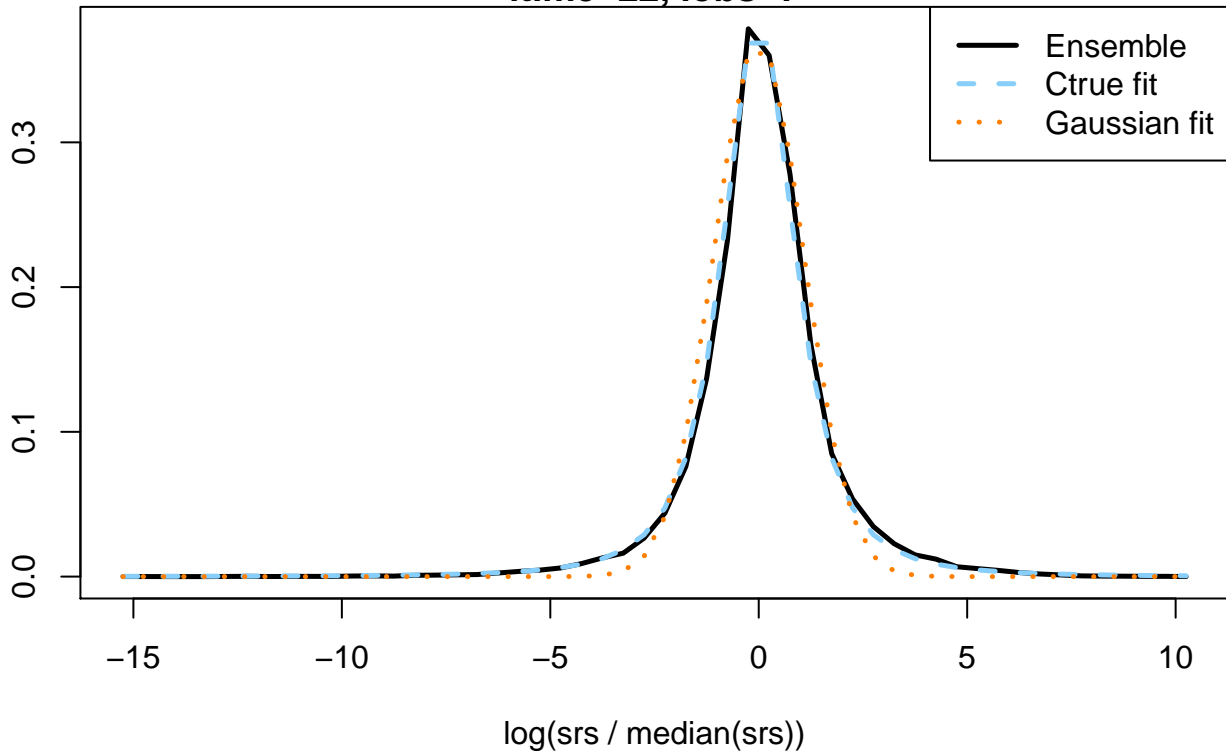

— Ensemble  
- - Ctrue fit  
... Gaussian fit

itime=22, iobs=8

density

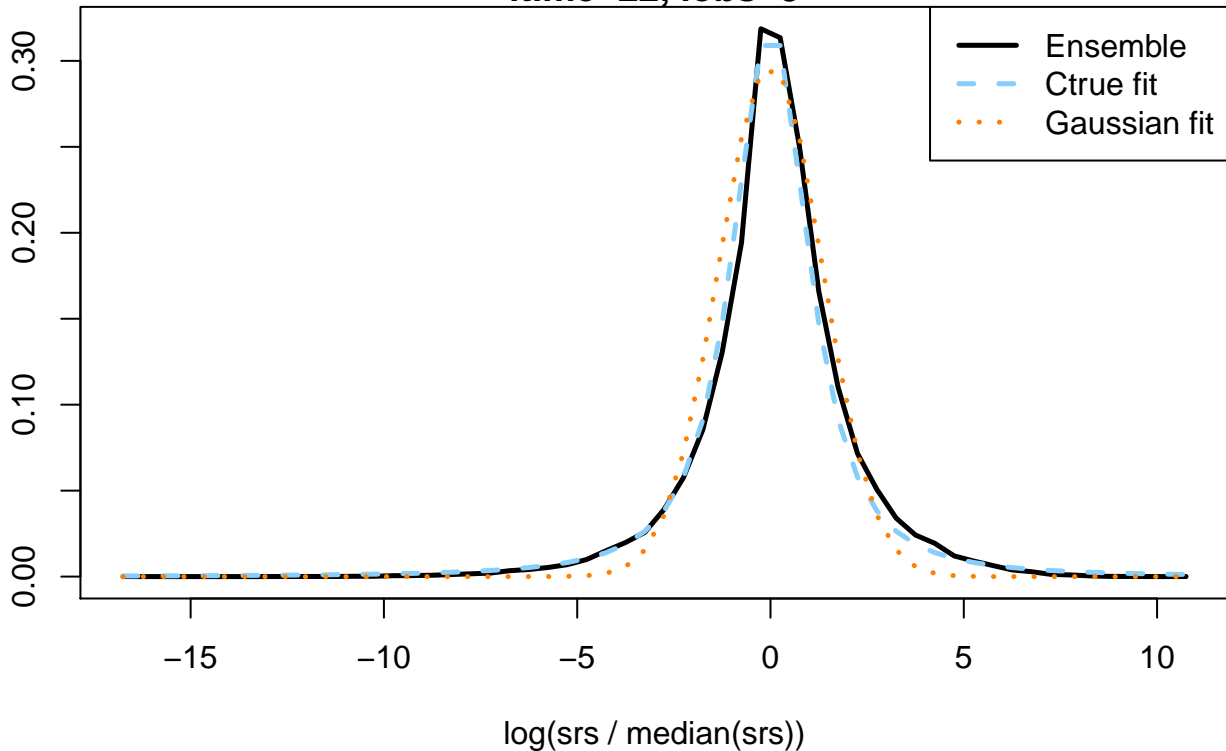



itime=22, iobs=9

density

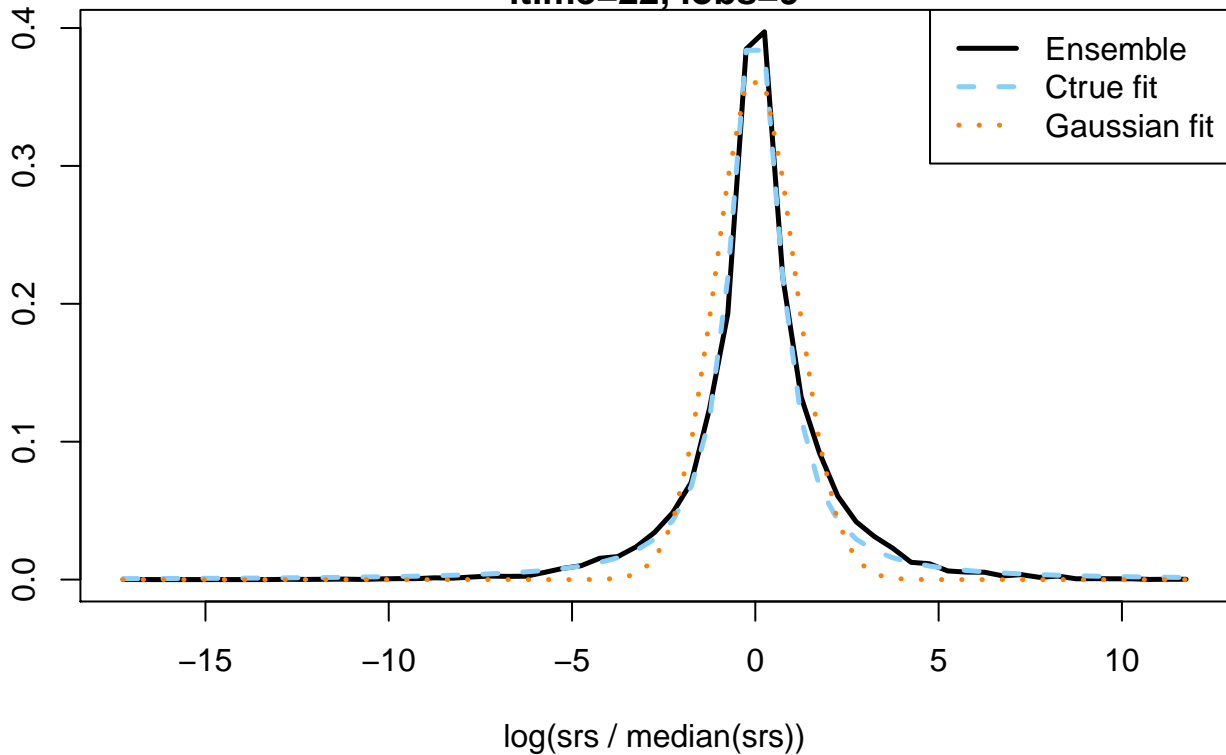

— Ensemble  
- - Ctrue fit  
... Gaussian fit

itime=23, iobs=10

density

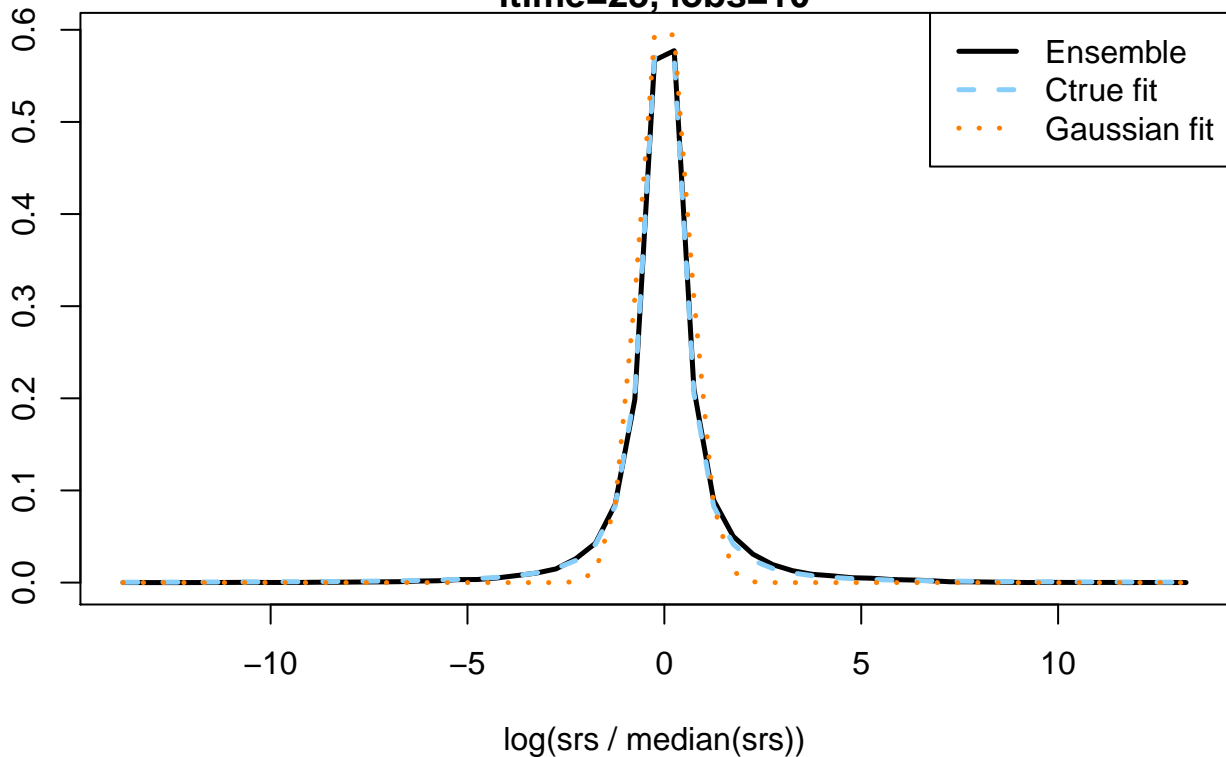

itime=23, iobs=11

density

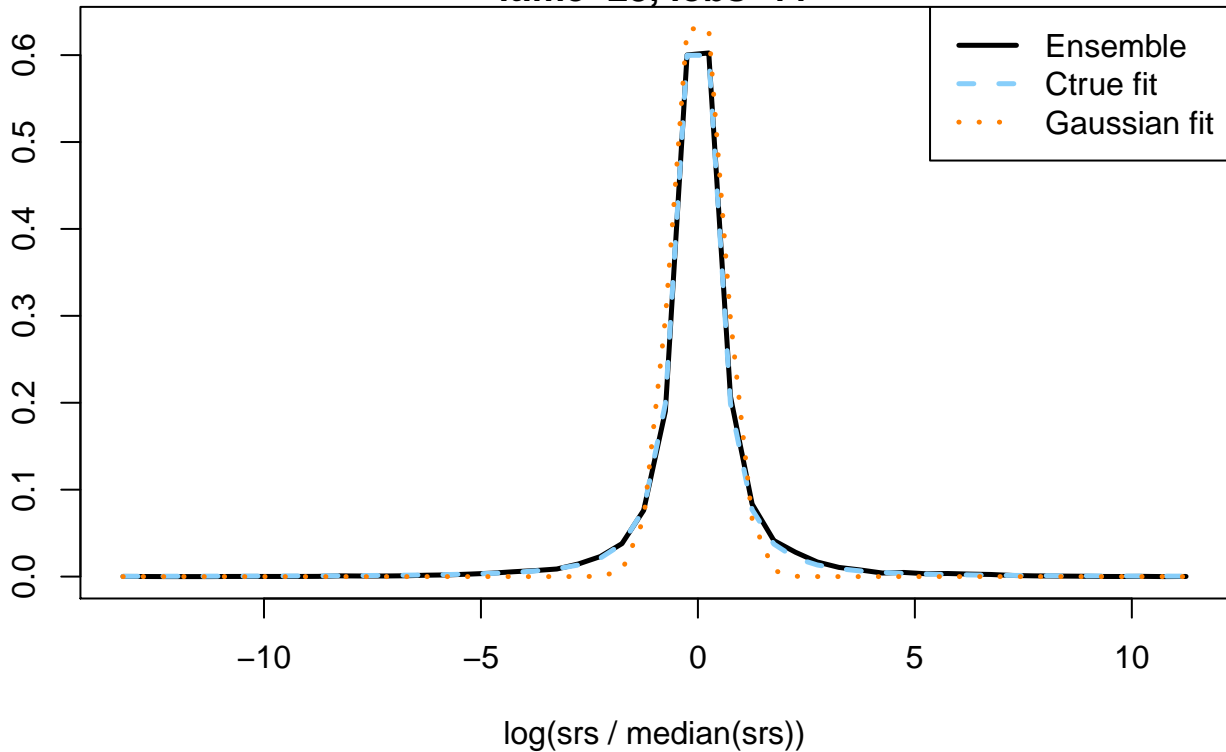

— Ensemble  
- - Ctrue fit  
... Gaussian fit

itime=23, iobs=12

density

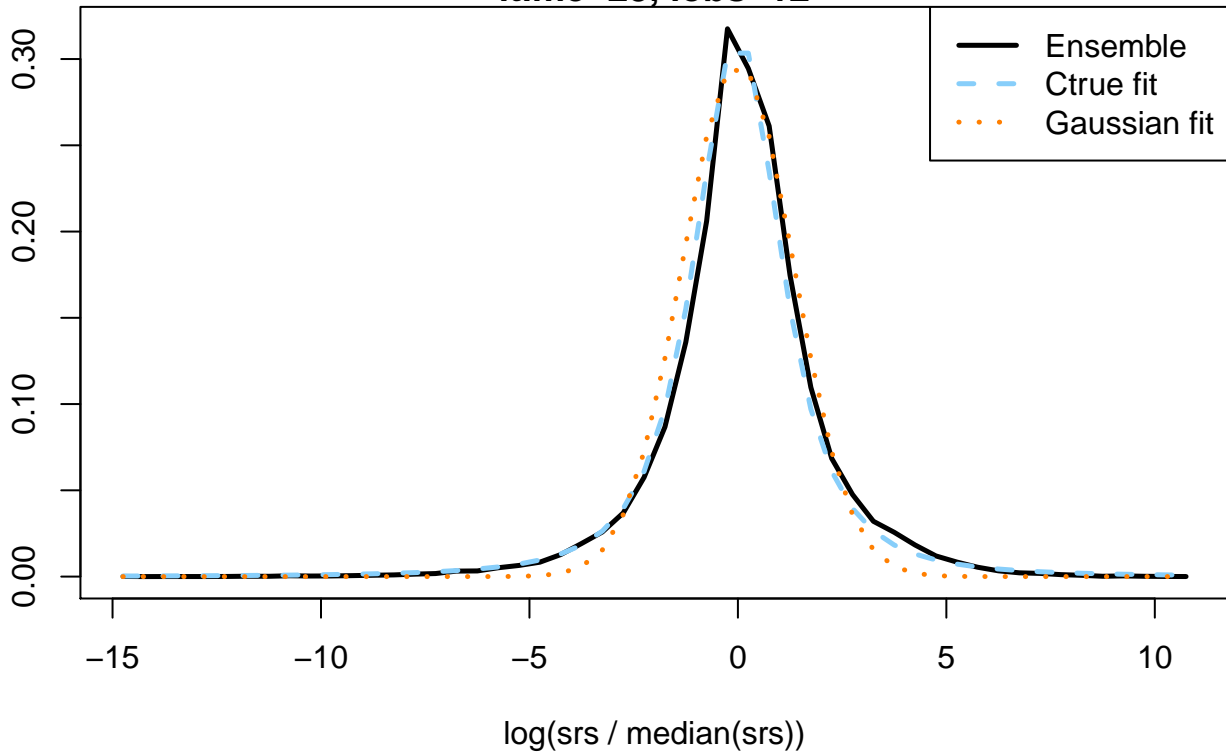

itime=23, iobs=1

density

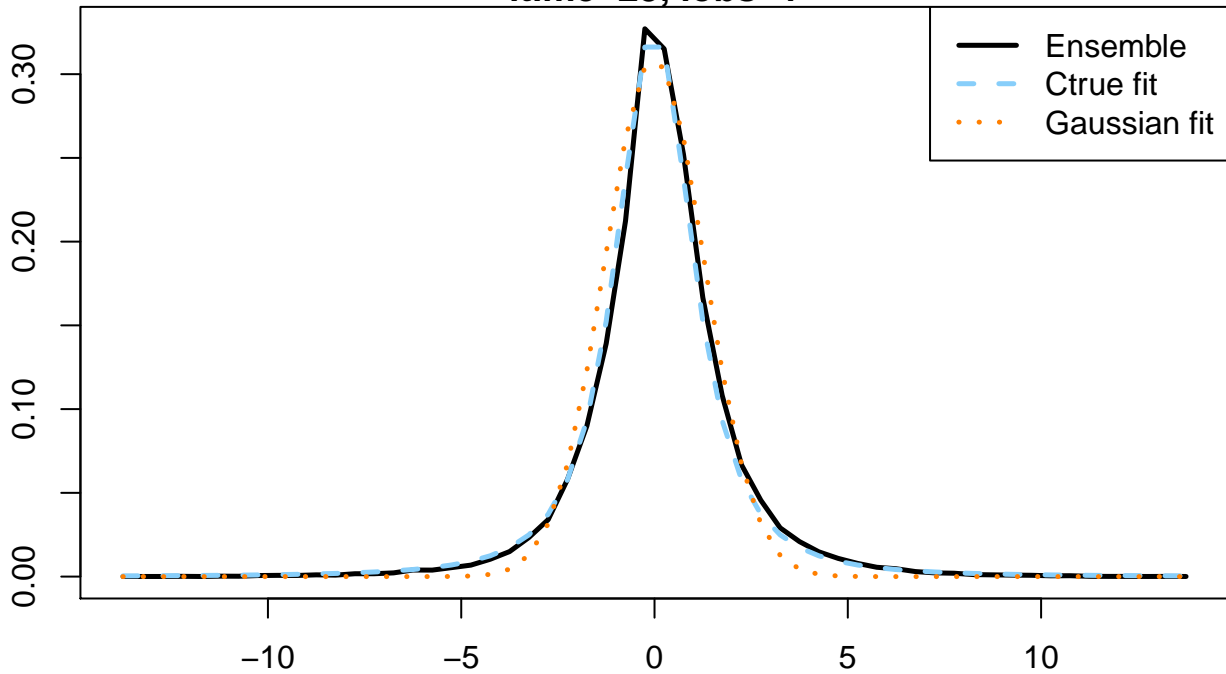

log(srs / median(srs))

itime=23, iobs=2

density

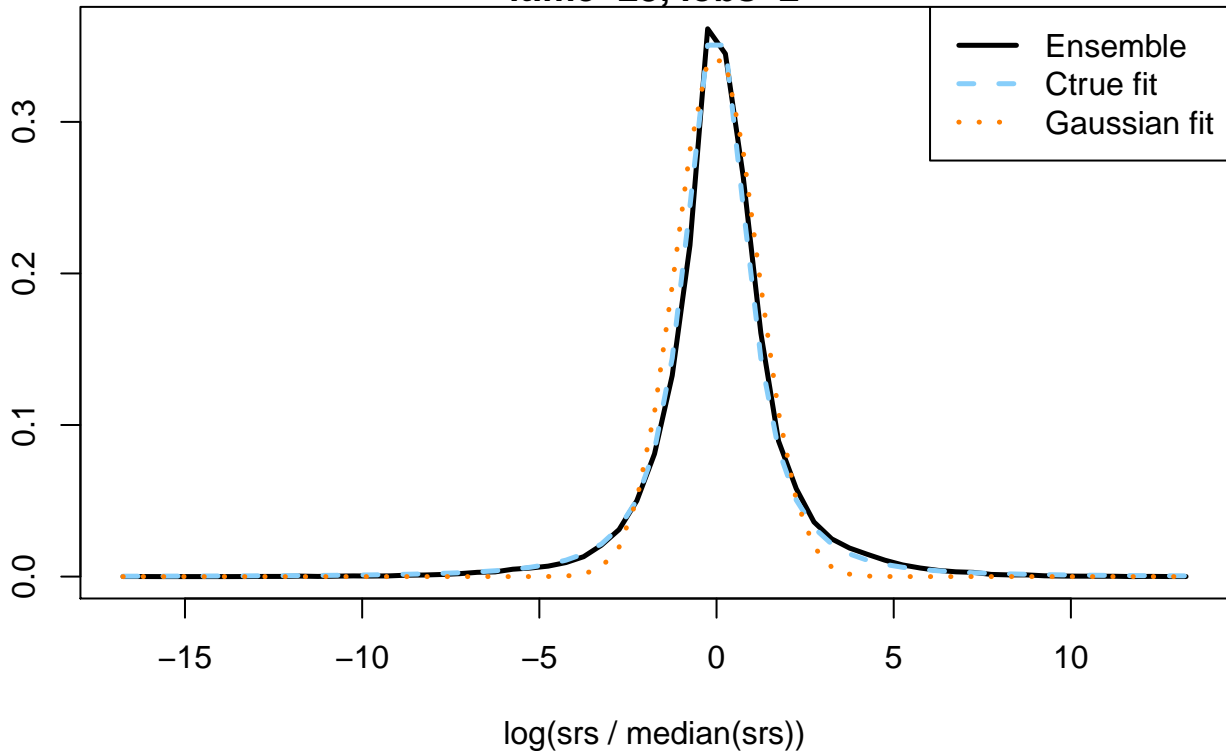

— Ensemble  
- - Ctrue fit  
... Gaussian fit

itime=23, iobs=3

density

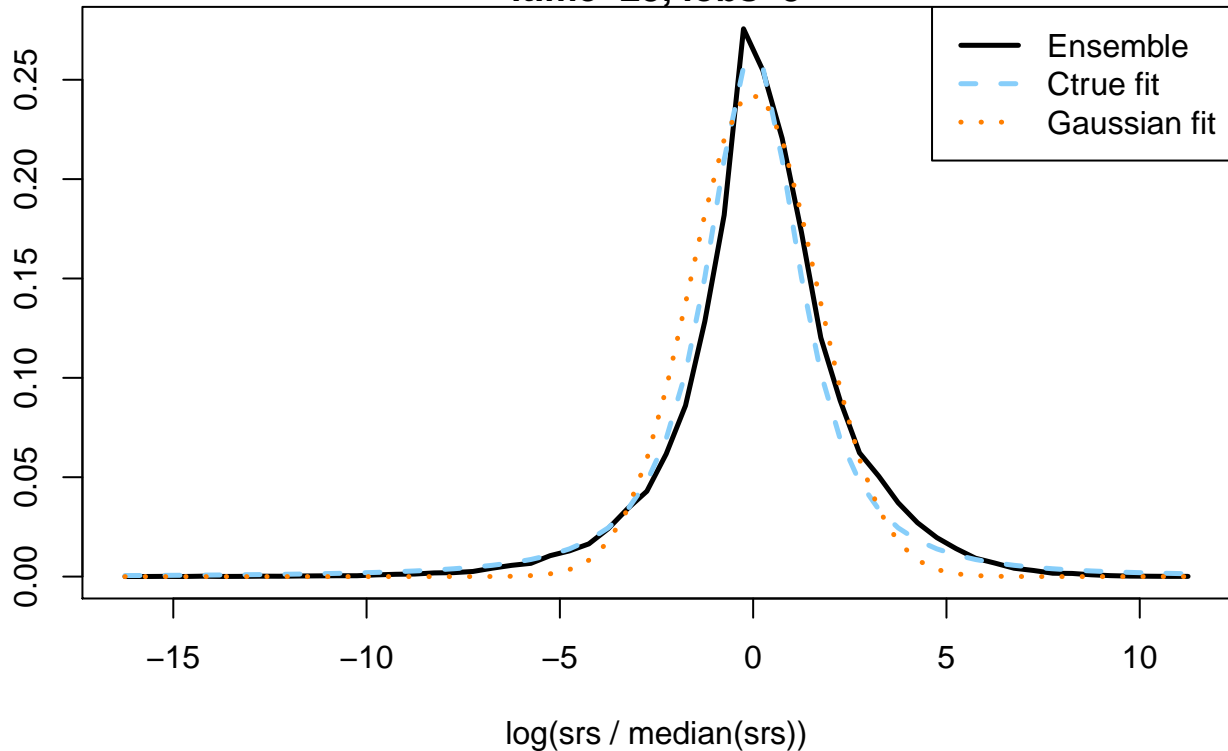

itime=23, iobs=4

density

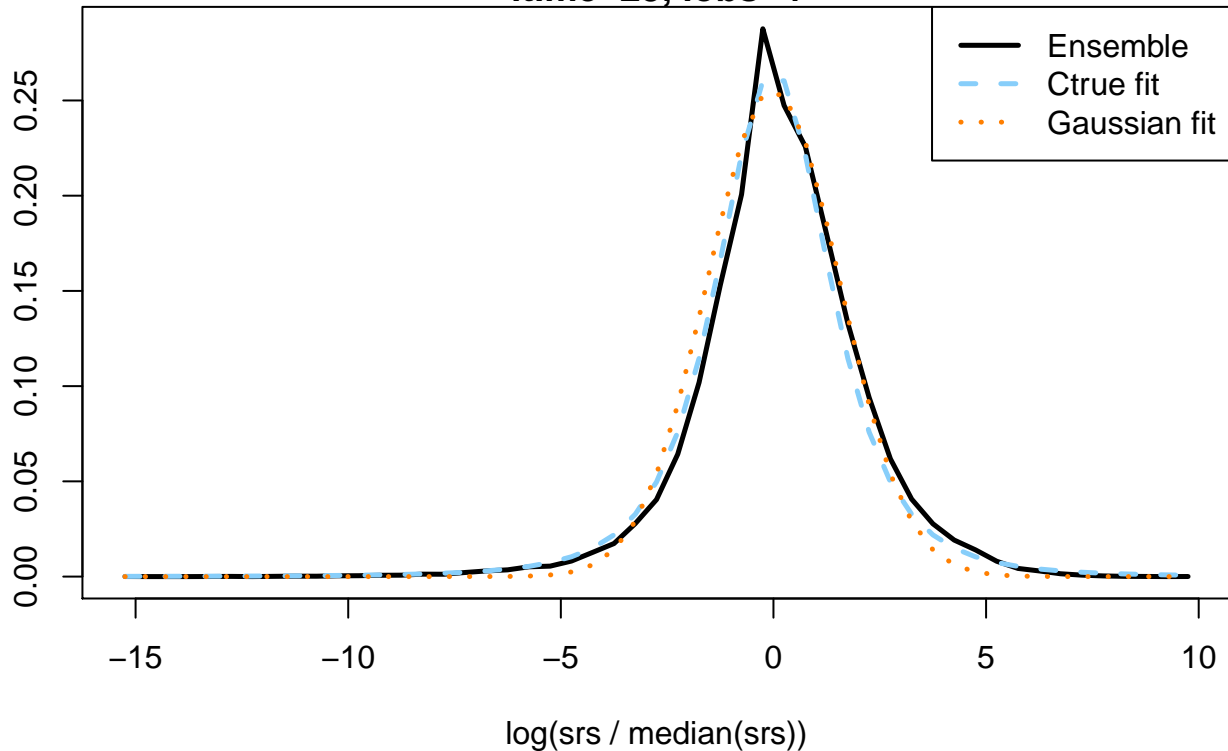



itime=23, iobs=5

density

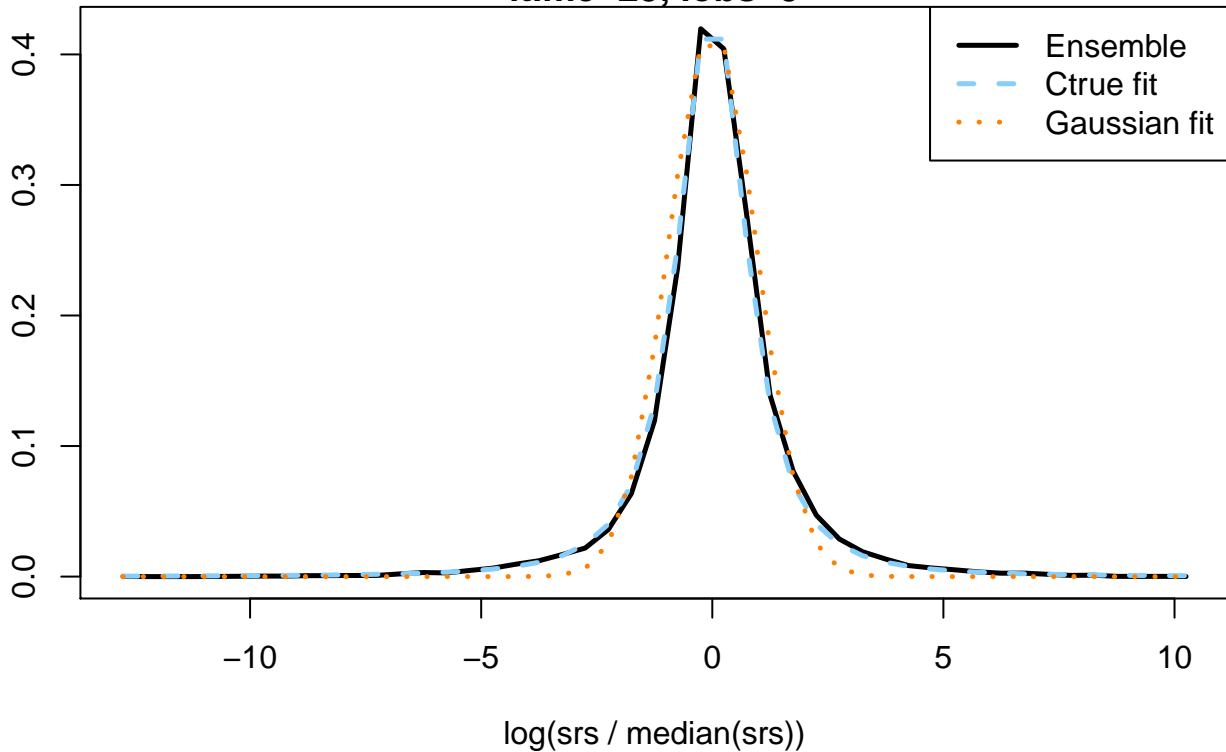

— Ensemble  
- - Ctrue fit  
... Gaussian fit

itime=23, iobs=6

density

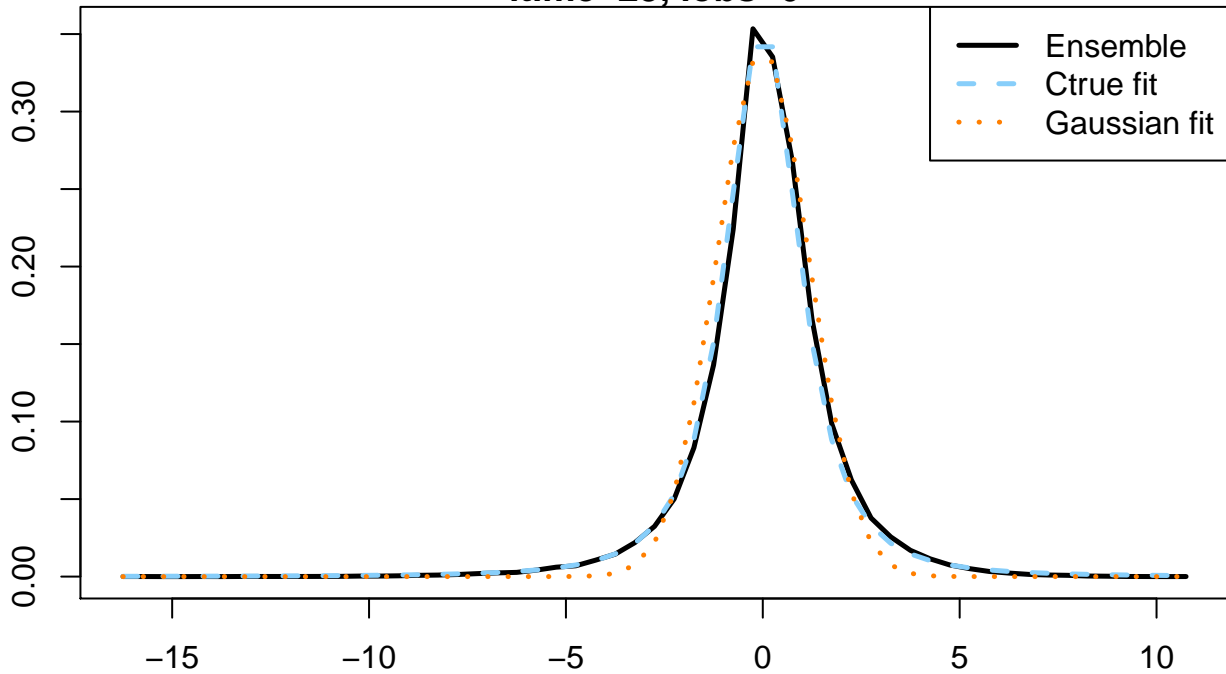

— Ensemble  
- - Ctrue fit  
... Gaussian fit

$\log(\text{srs} / \text{median}(\text{srs}))$

itime=23, iobs=7

density

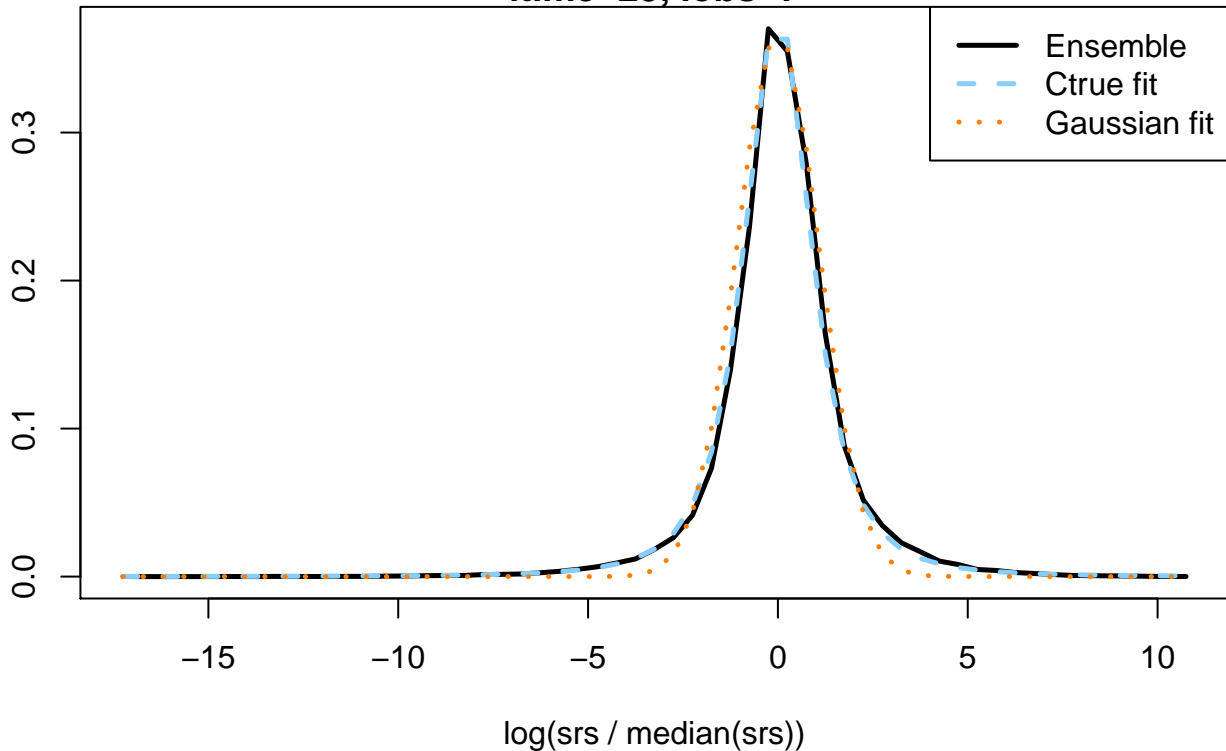

— Ensemble  
- - Ctrue fit  
... Gaussian fit

itime=23, iobs=8

density

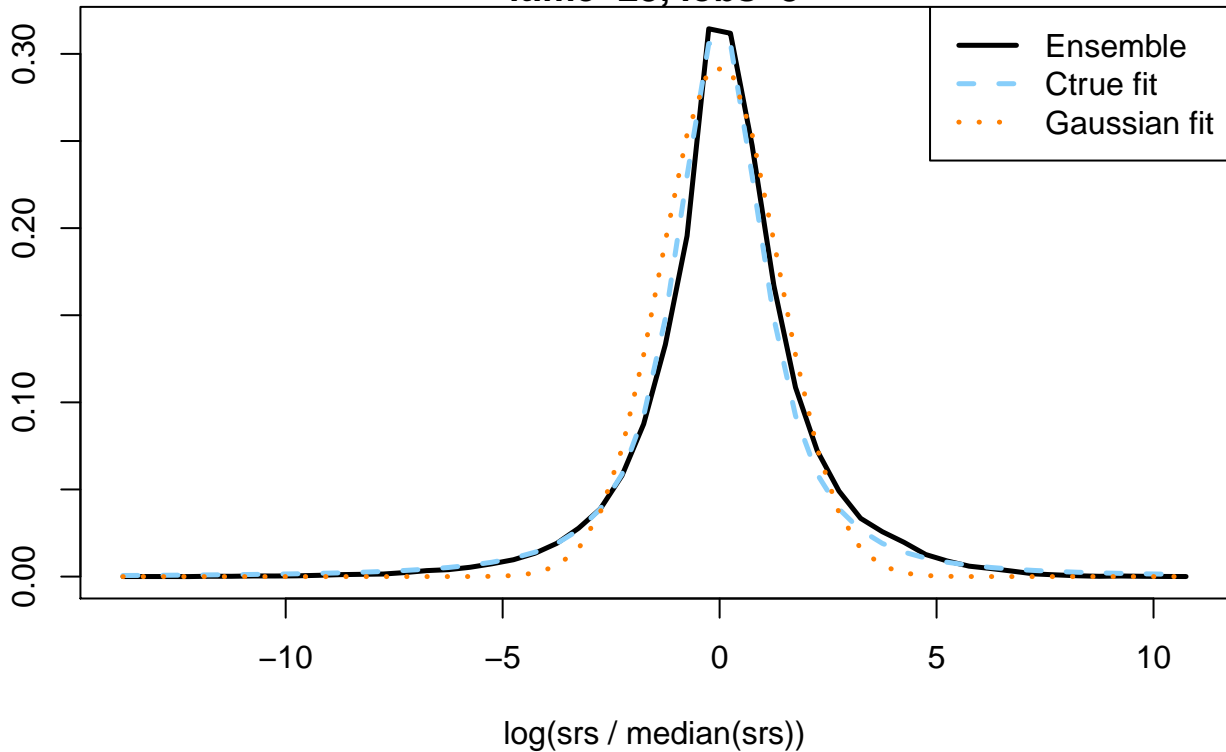

— Ensemble  
- - Ctrue fit  
... Gaussian fit

itime=23, iobs=9

density

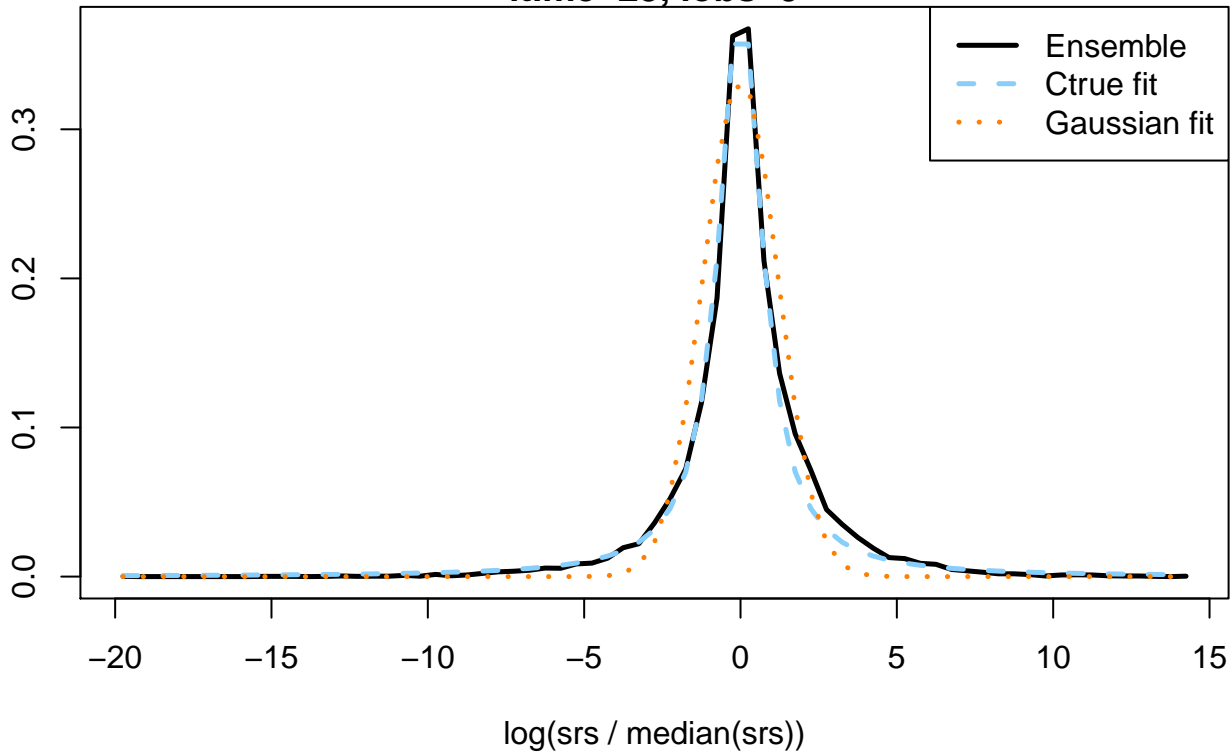

itime=24, iobs=10

density

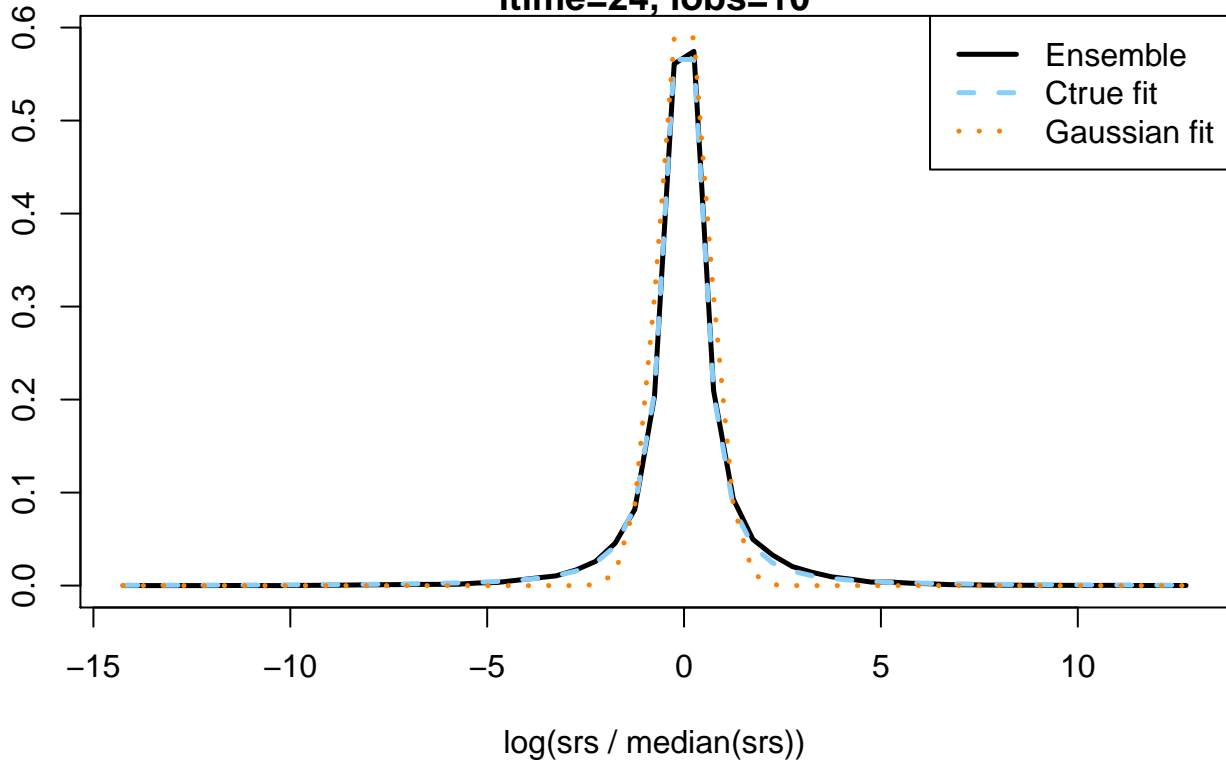

itime=24, iobs=11

density

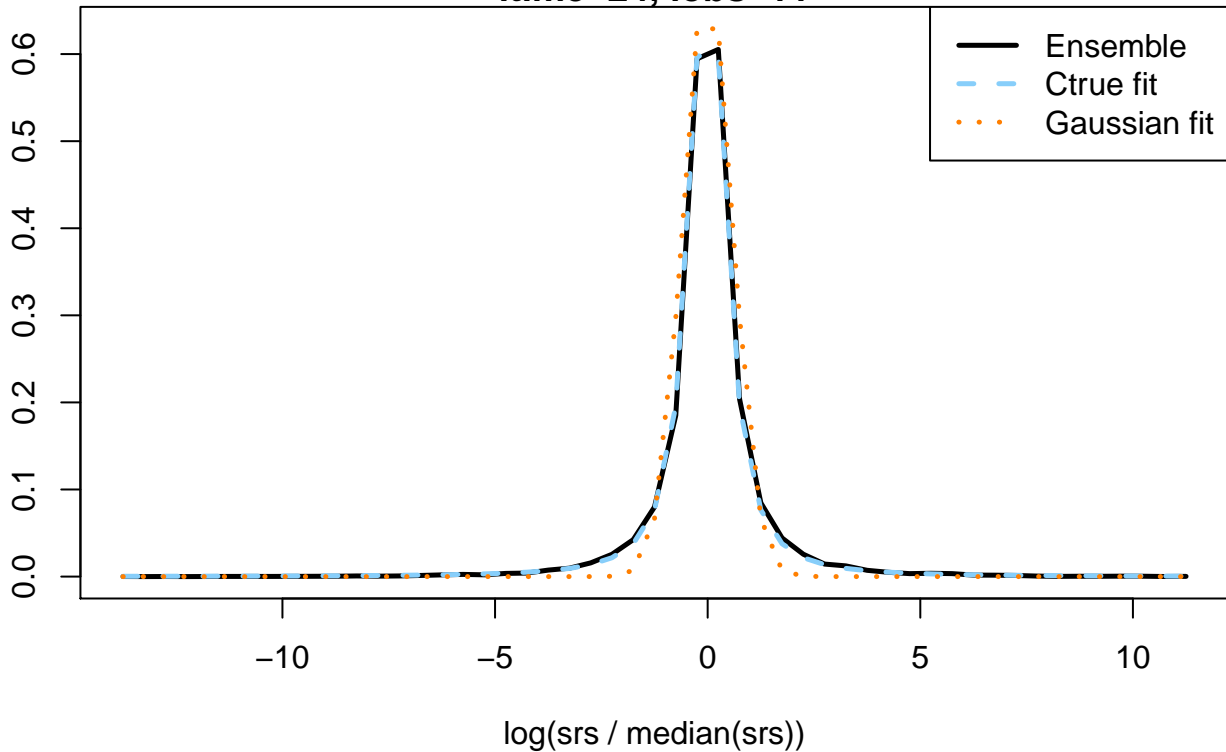

— Ensemble  
- - Ctrue fit  
... Gaussian fit

itime=24, iobs=12

density

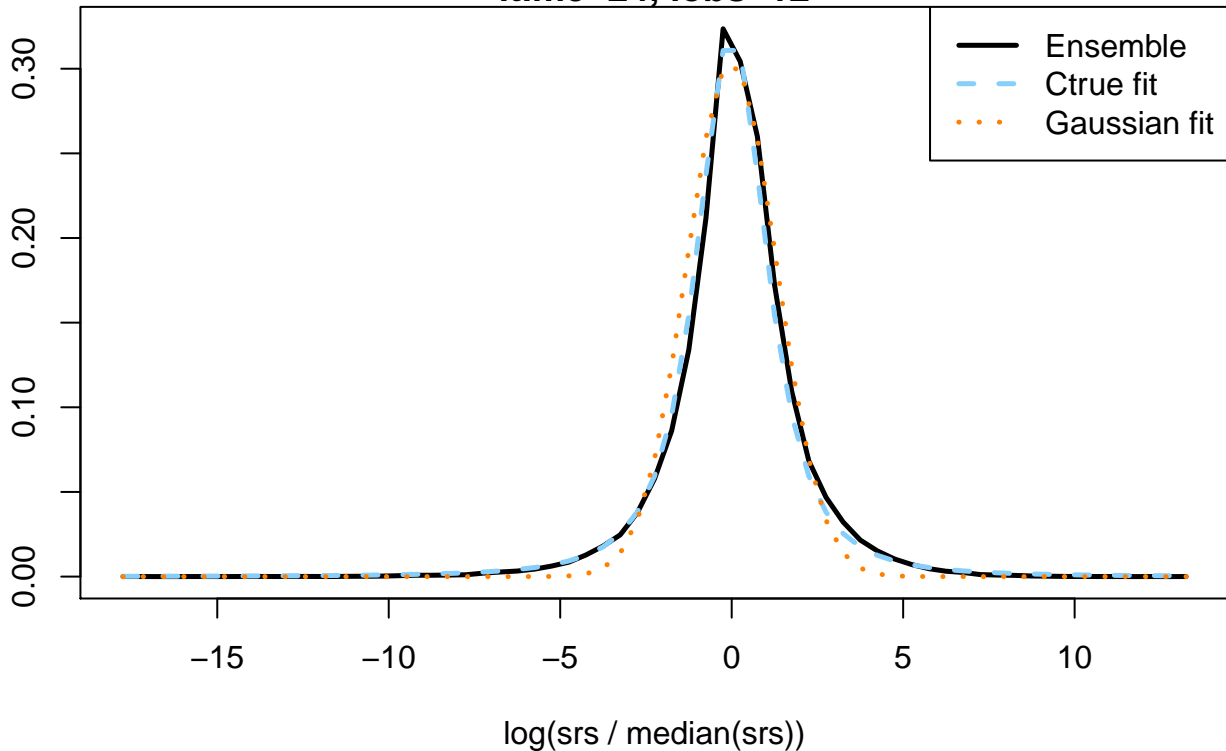



itime=24, iobs=1

density

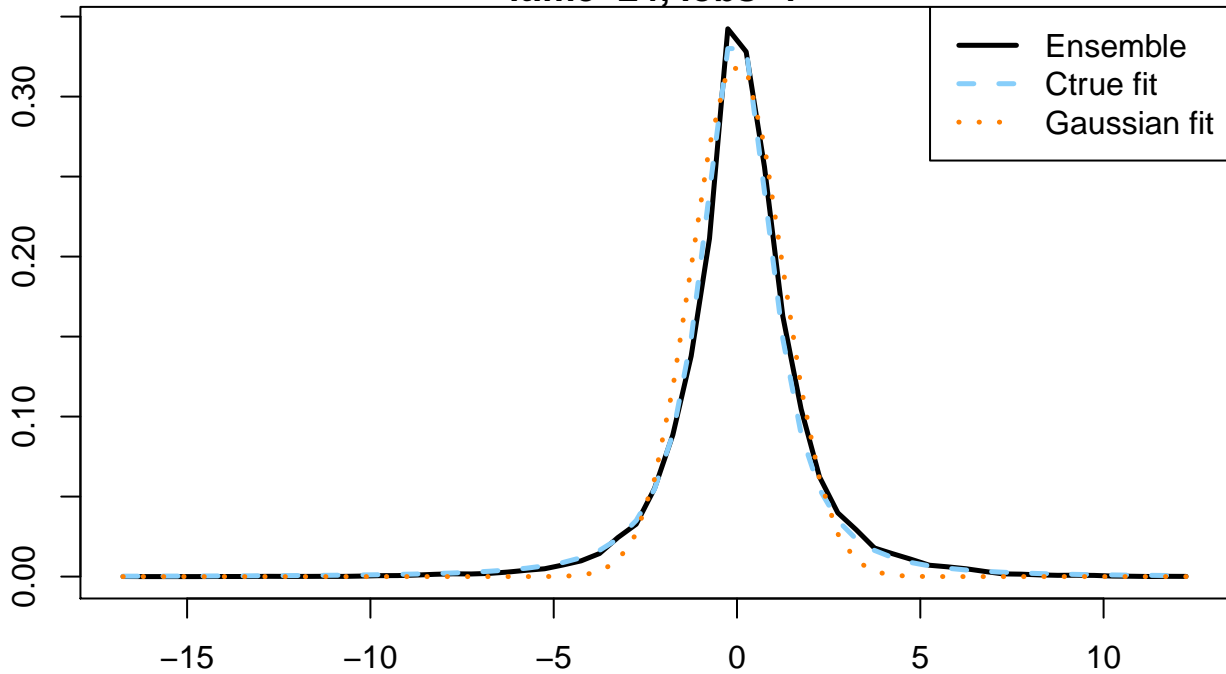

— Ensemble  
- - Ctrue fit  
... Gaussian fit

$\log(\text{srs} / \text{median}(\text{srs}))$

itime=24, iobs=2

density

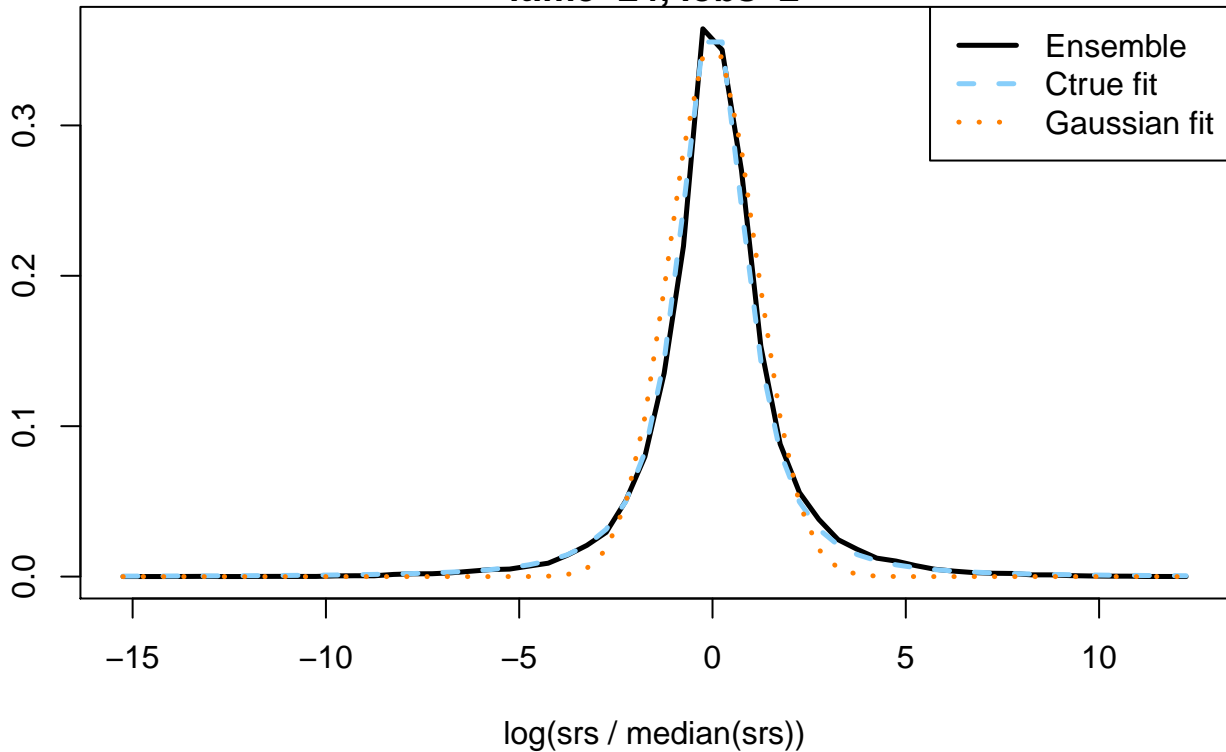

— Ensemble  
- - Ctrue fit  
... Gaussian fit

itime=24, iobs=3

density

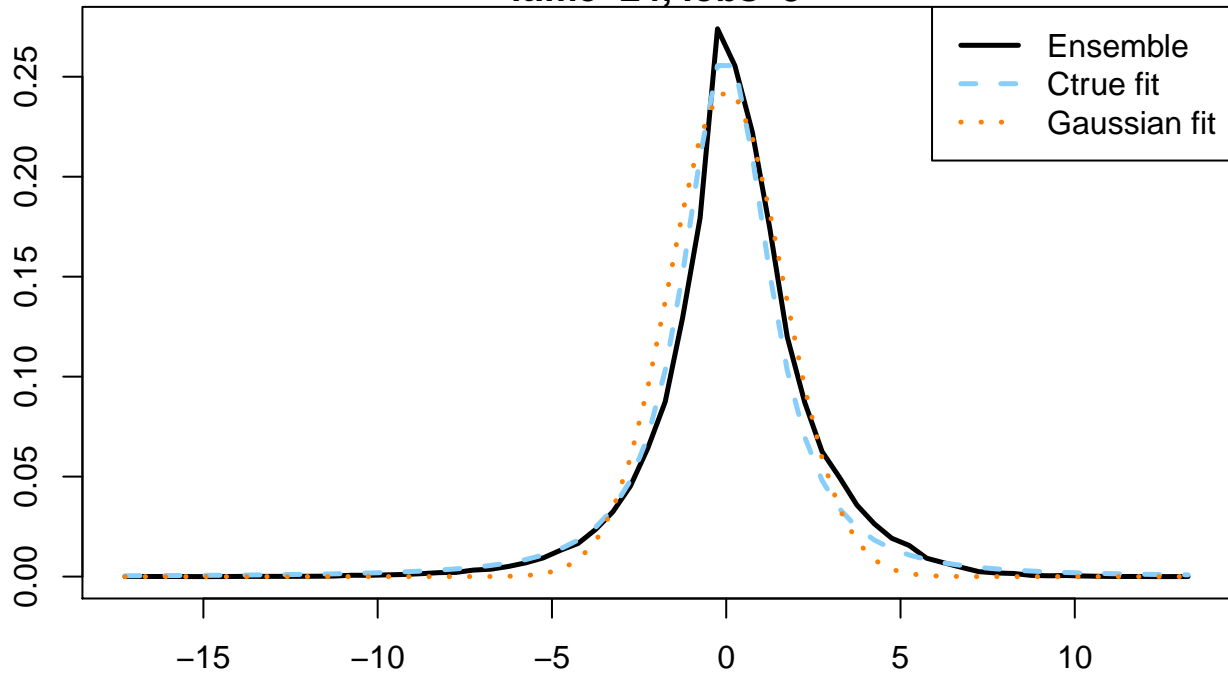

log(srs / median(srs))

itime=24, iobs=4

density

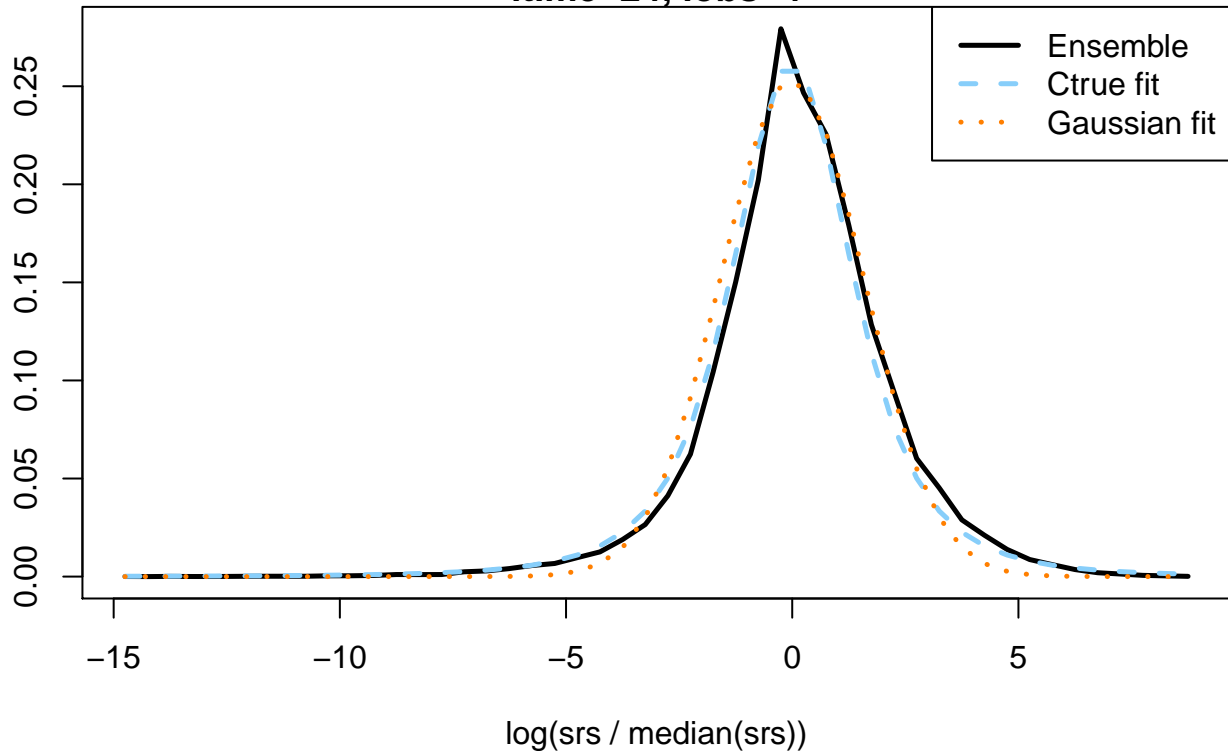

itime=24, iobs=5

density

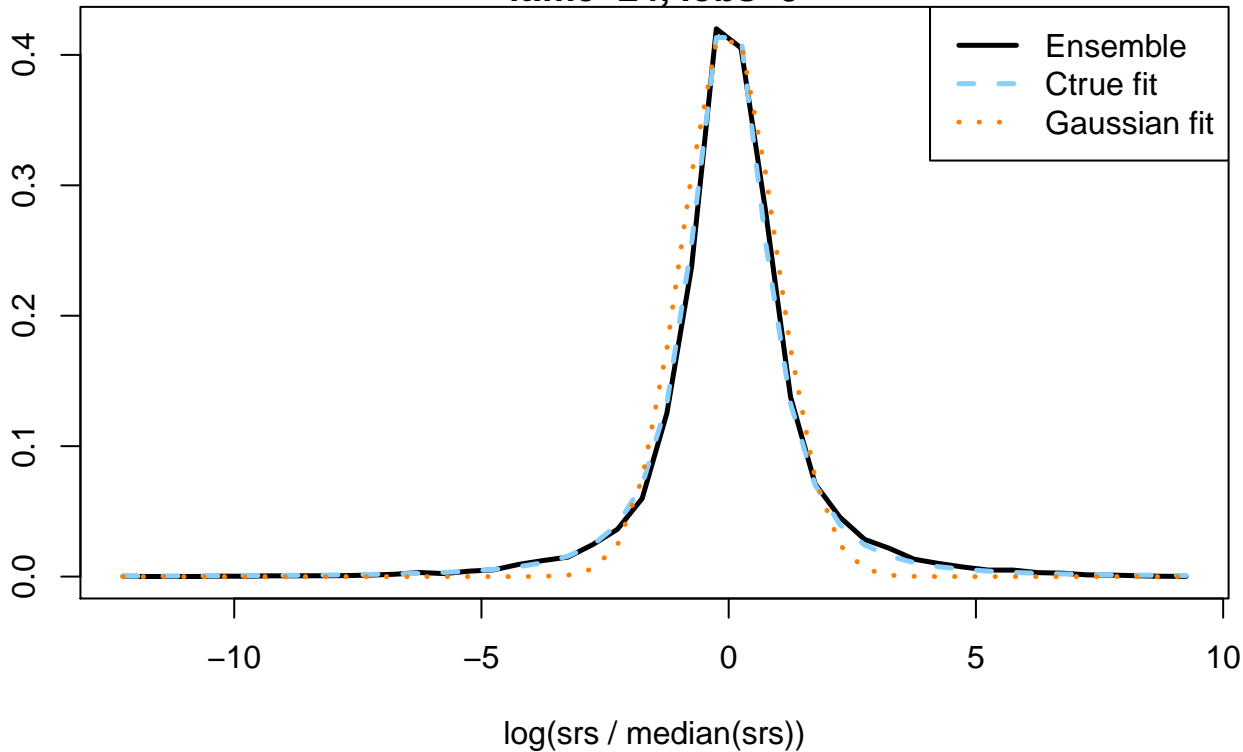

itime=24, iobs=6

density

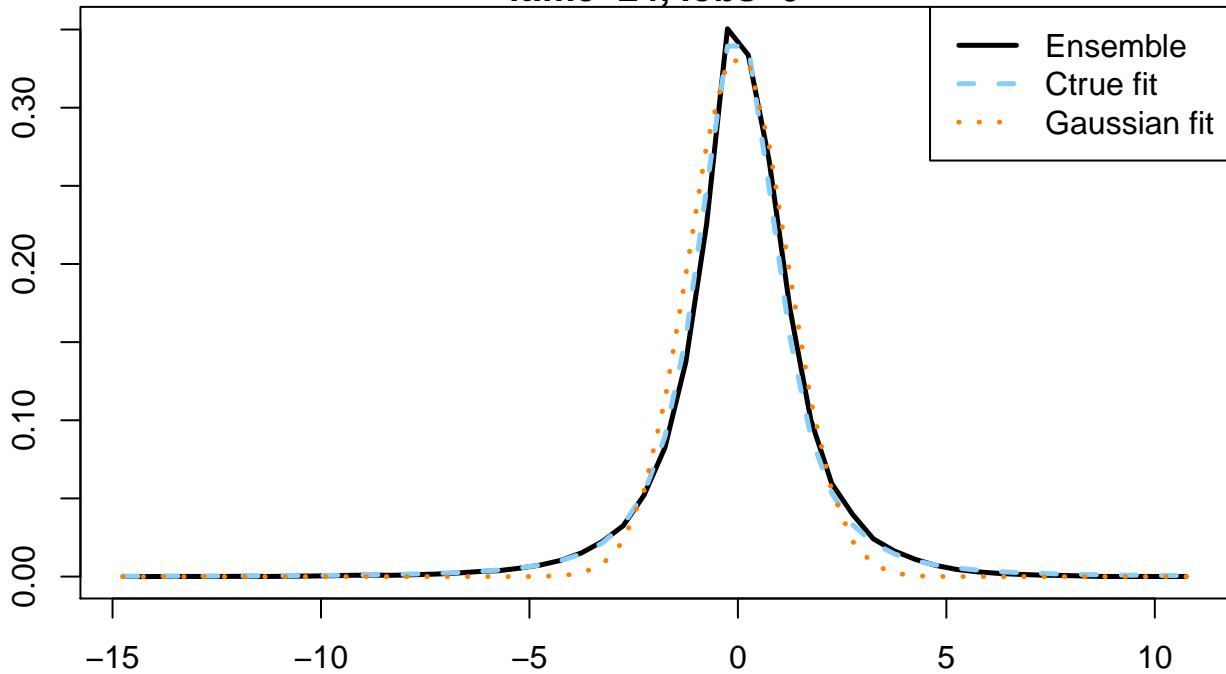

— Ensemble  
- - Ctrue fit  
... Gaussian fit

$\log(\text{srs} / \text{median}(\text{srs}))$

itime=24, iobs=7

density

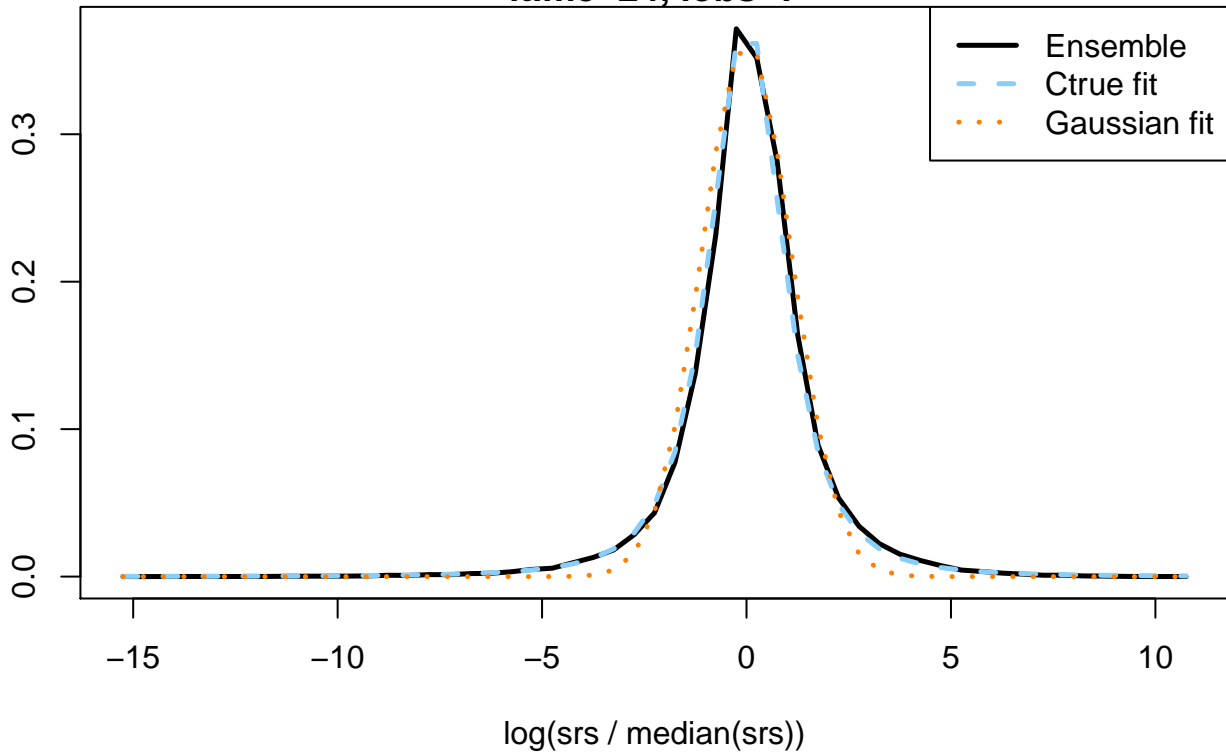

itime=24, iobs=8

density

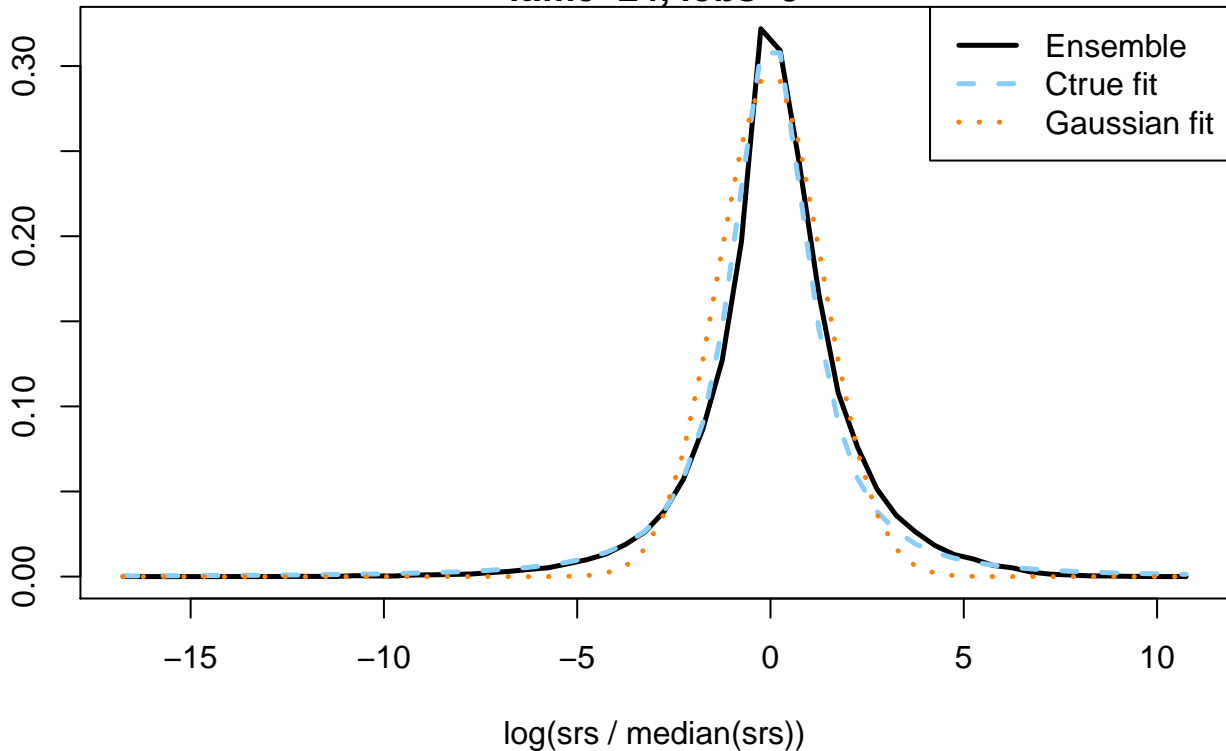



itime=24, iobs=9

density

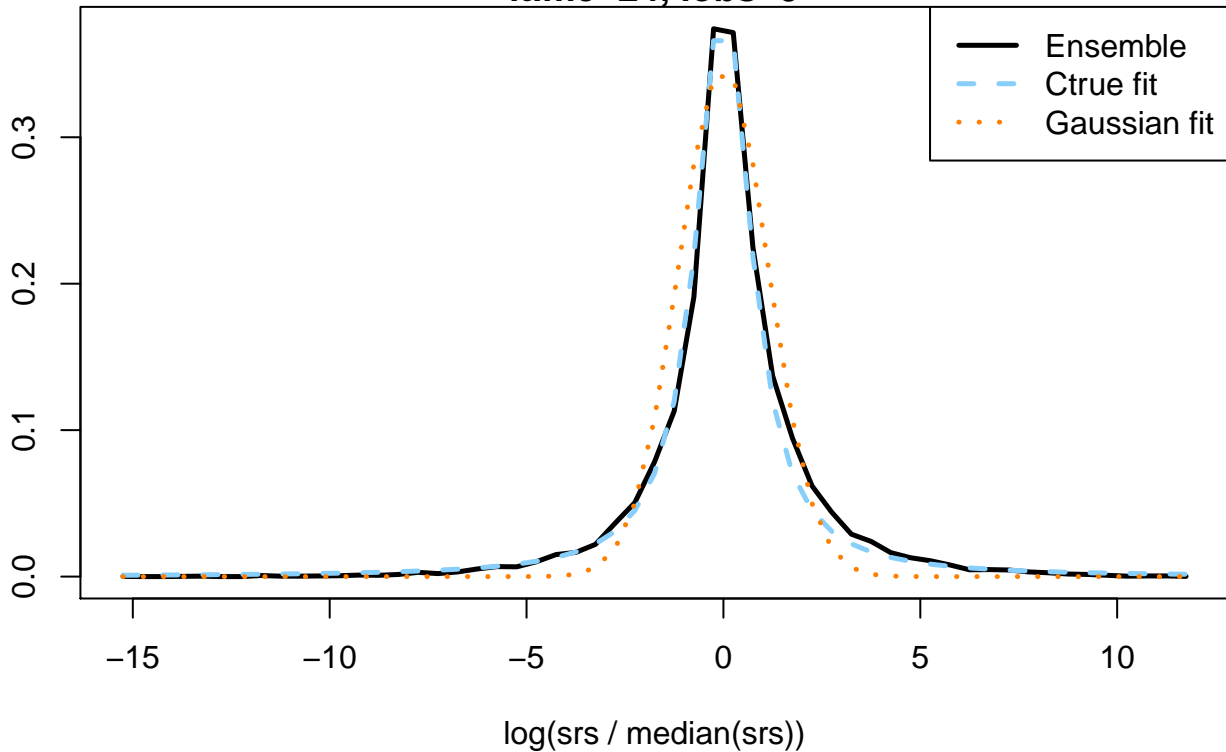

itime=2, iobs=10

density

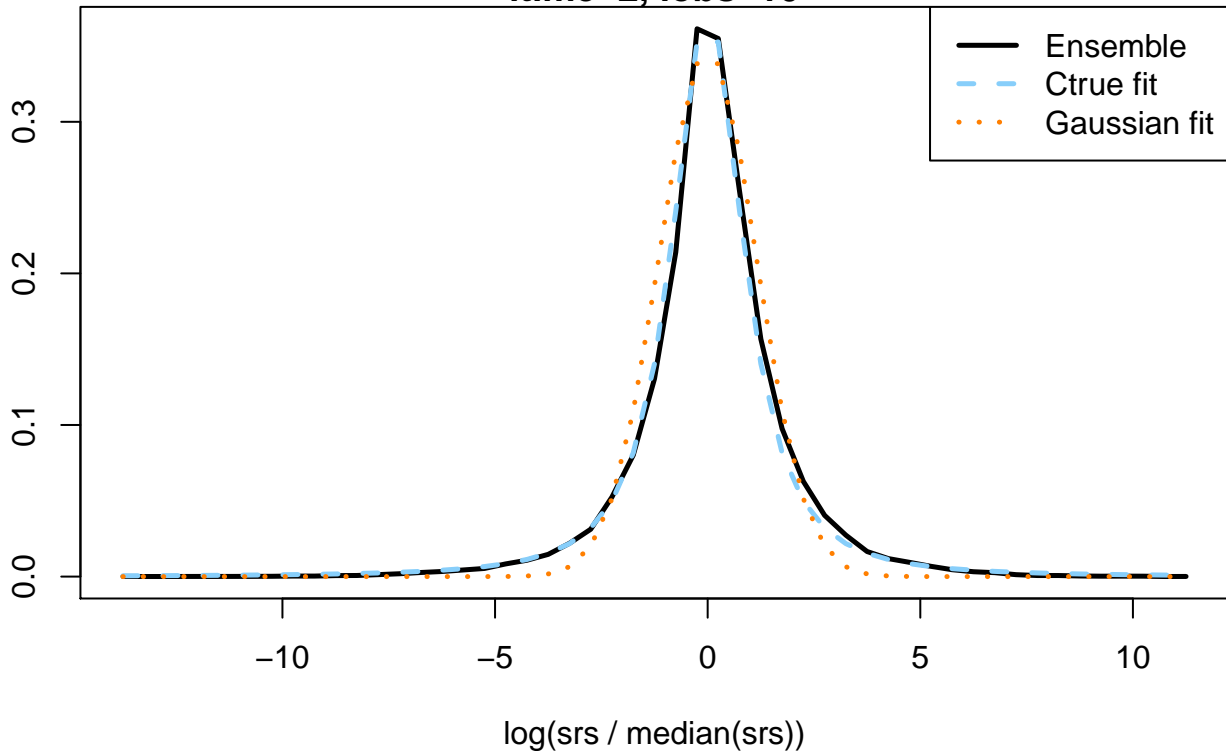

itime=2, iobs=11

density

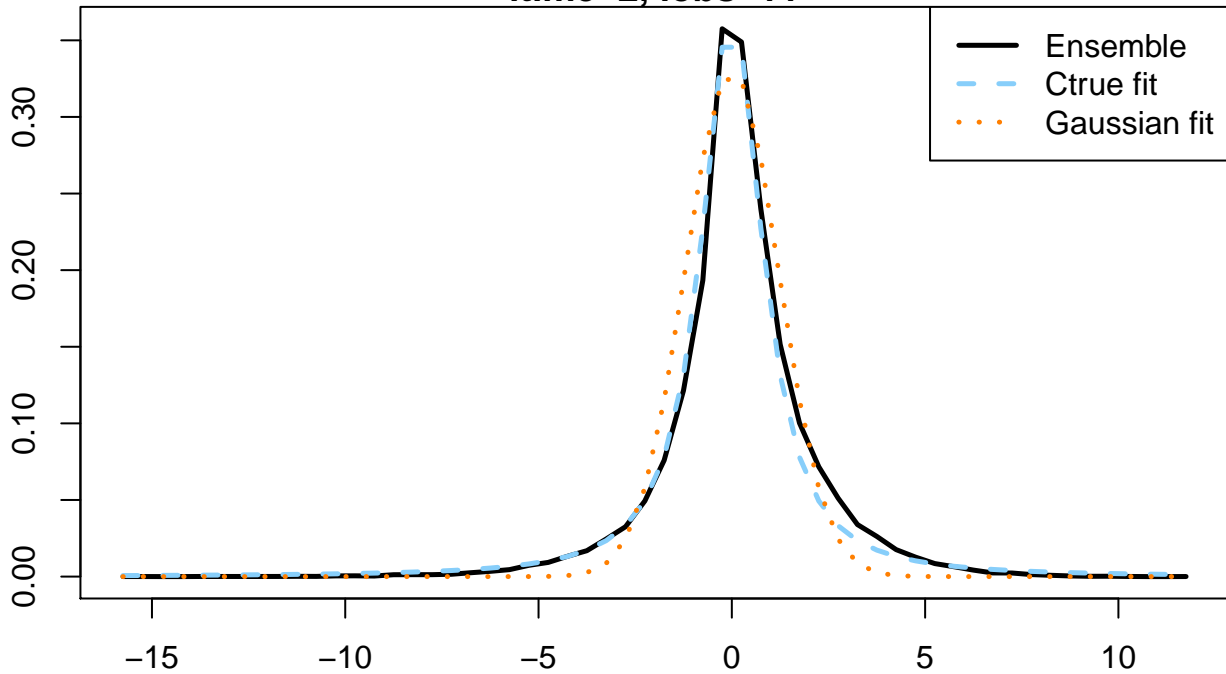

— Ensemble  
- - Ctrue fit  
... Gaussian fit

$\log(\text{srs} / \text{median}(\text{srs}))$

itime=2, iobs=12

density

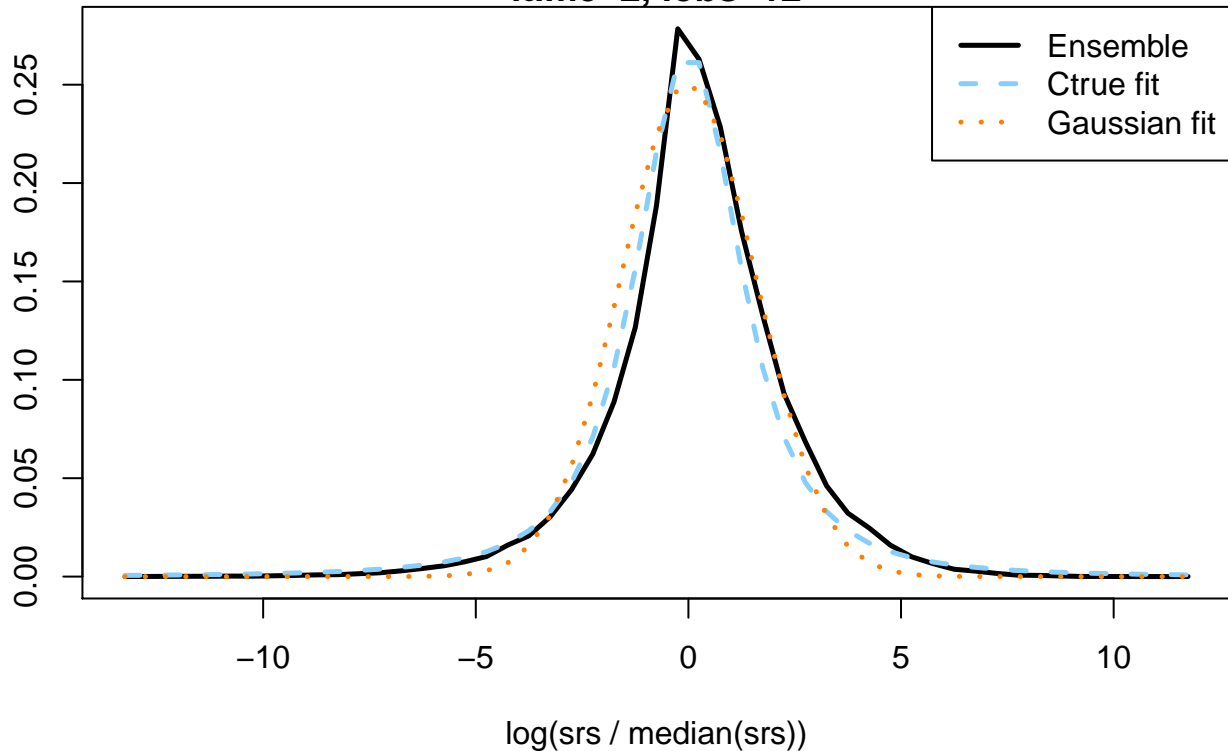

itime=2, iobs=1

density

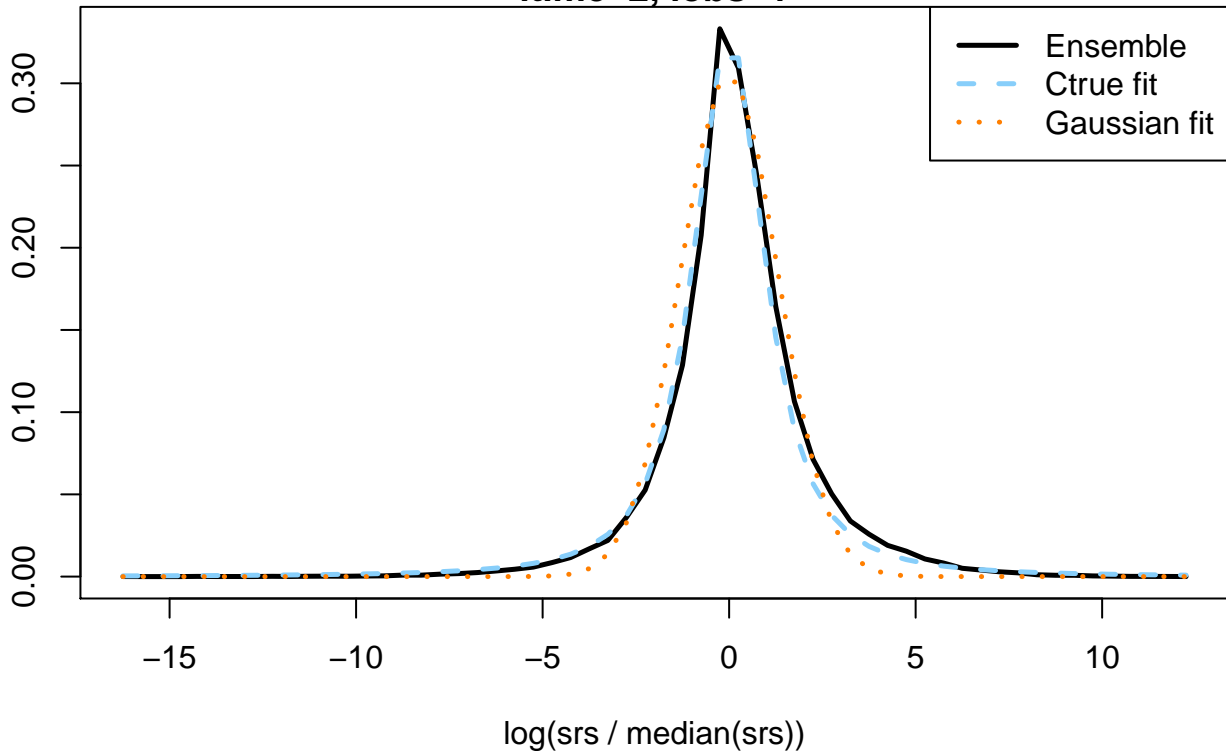

itime=2, iobs=2

density

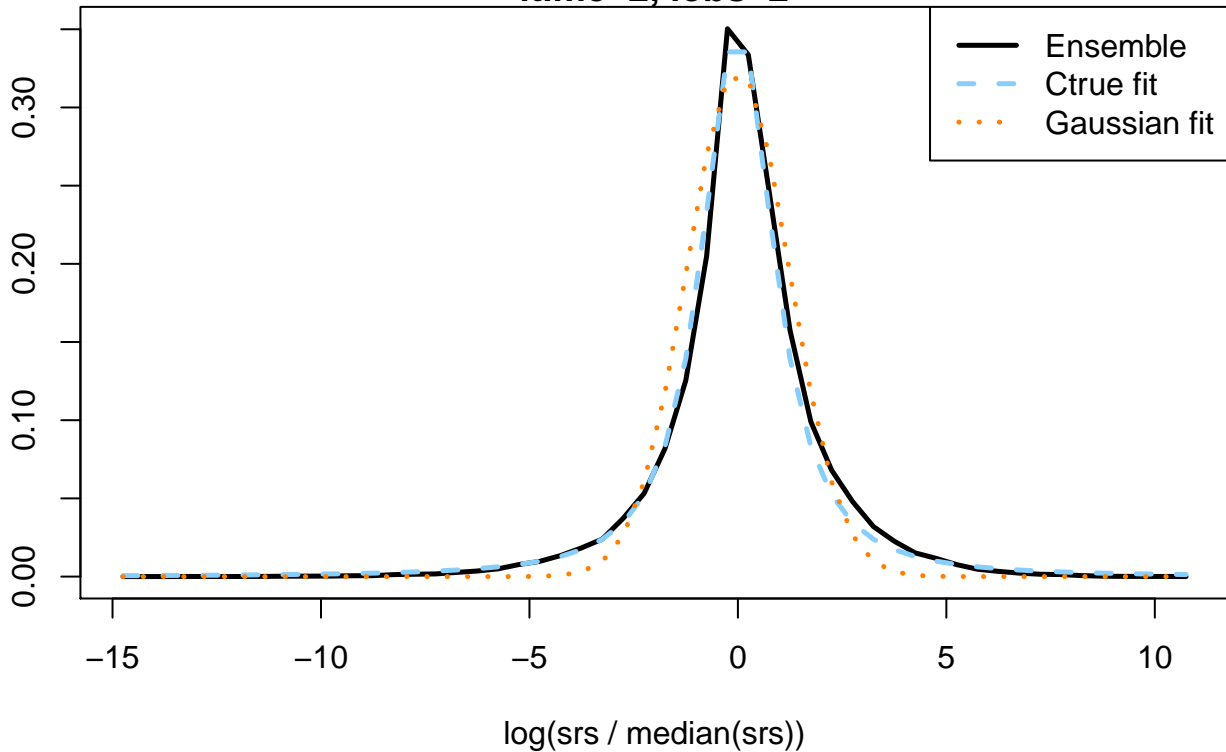

itime=2, iobs=3

density

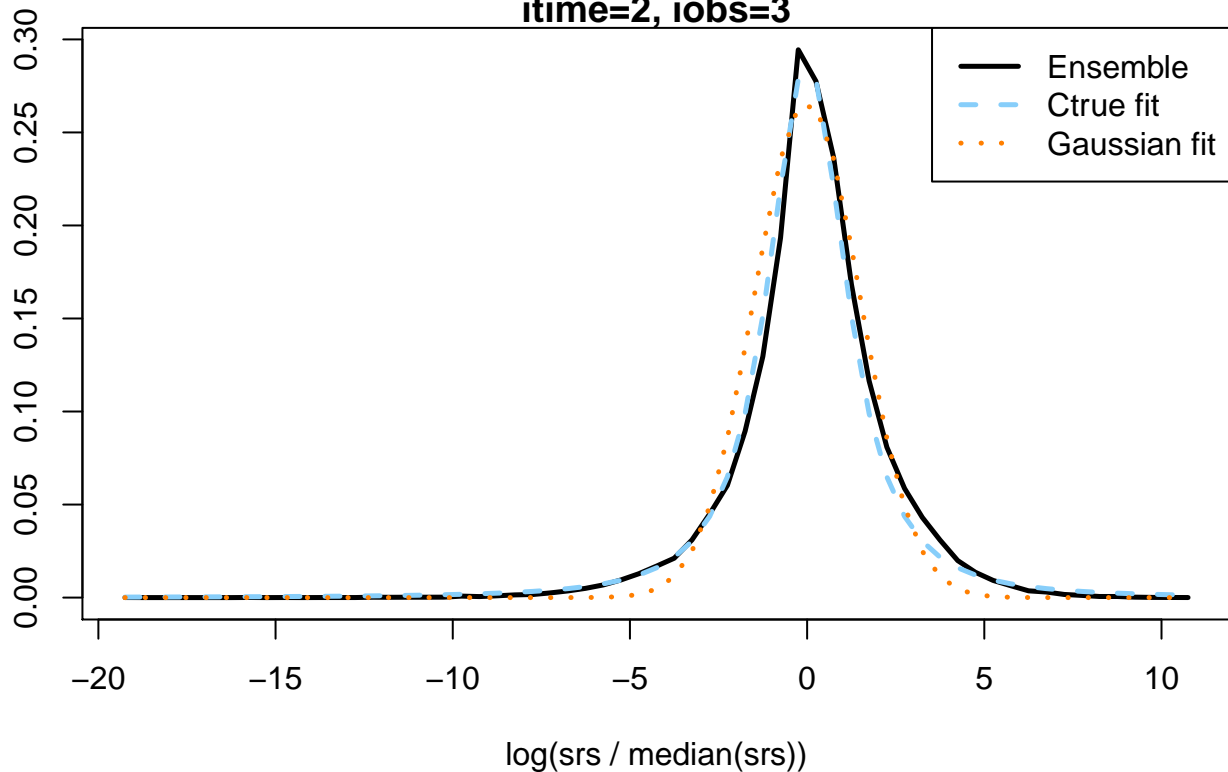

itime=2, iobs=4

density

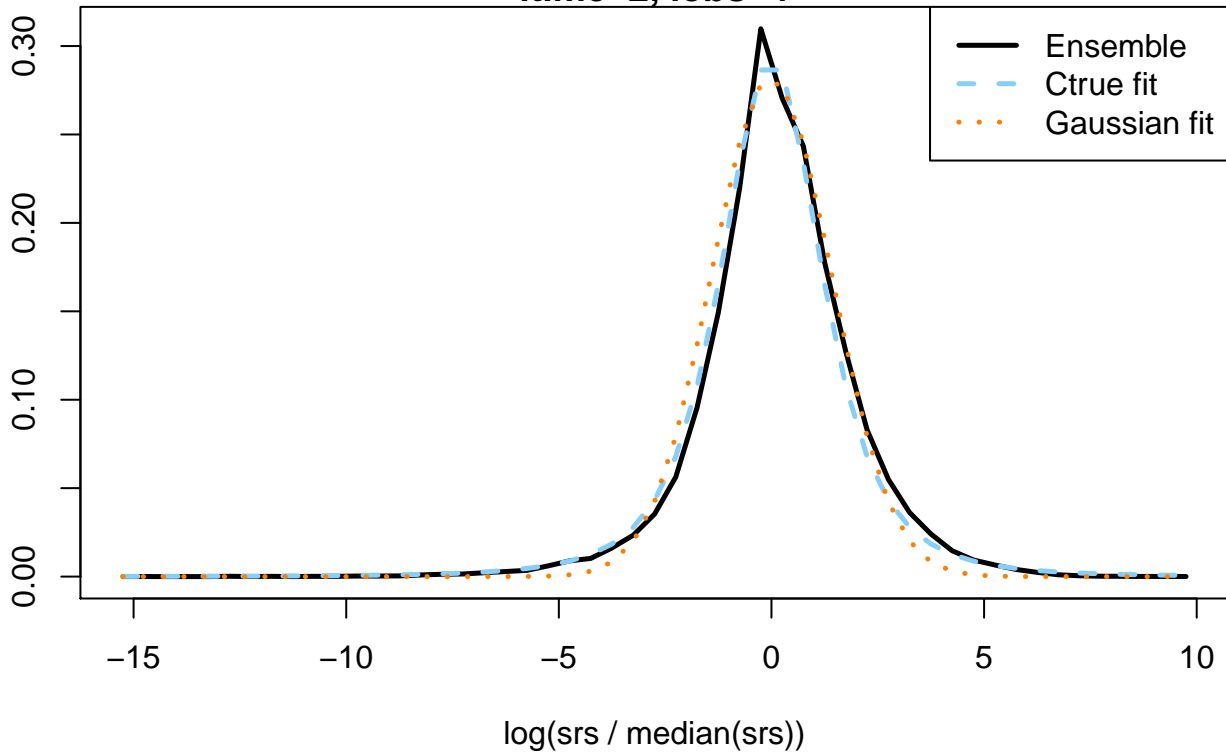



itime=2, iobs=5

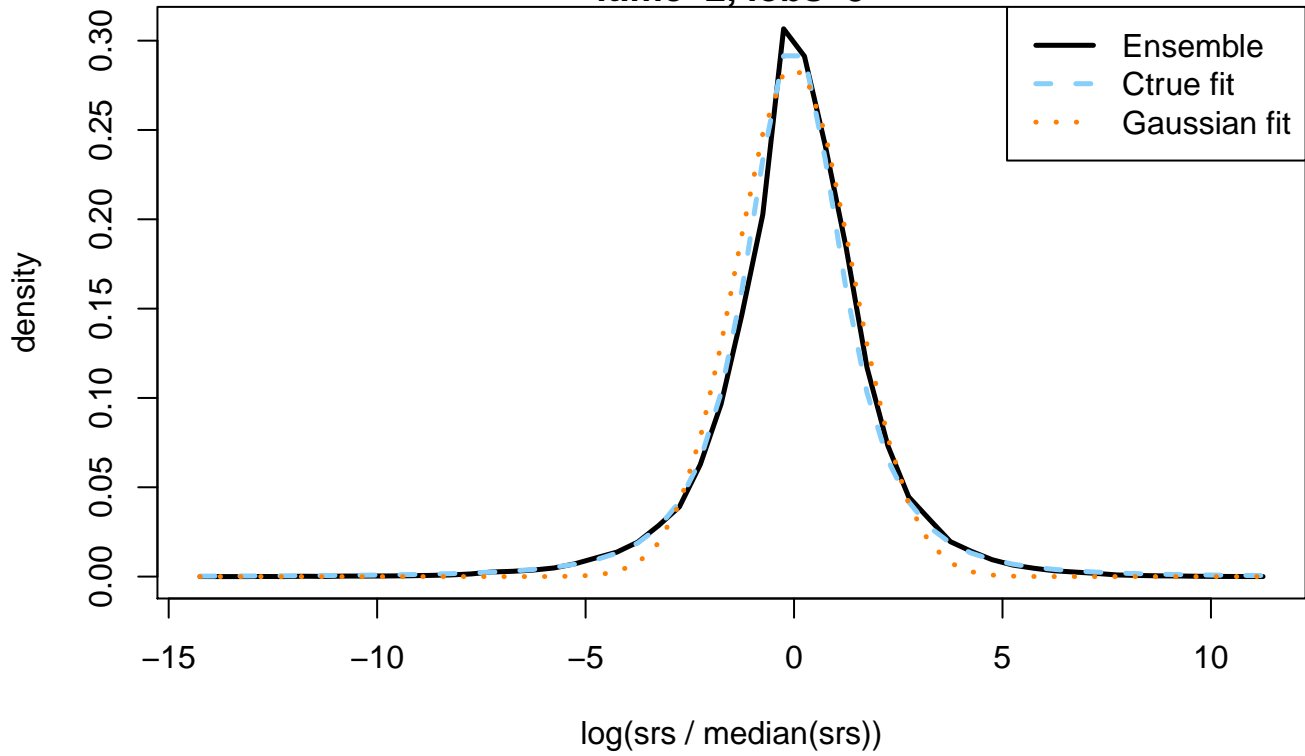

itime=2, iobs=6

density

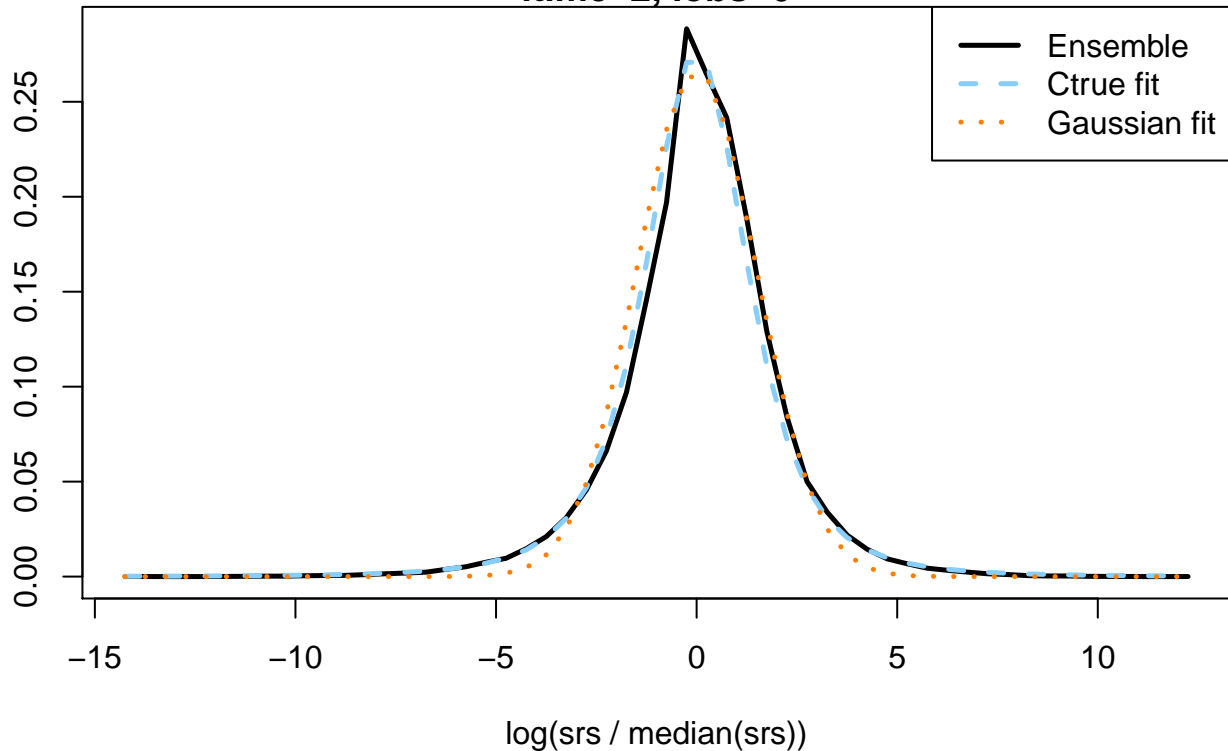

— Ensemble  
- - Ctrue fit  
... Gaussian fit

itime=2, iobs=7

density

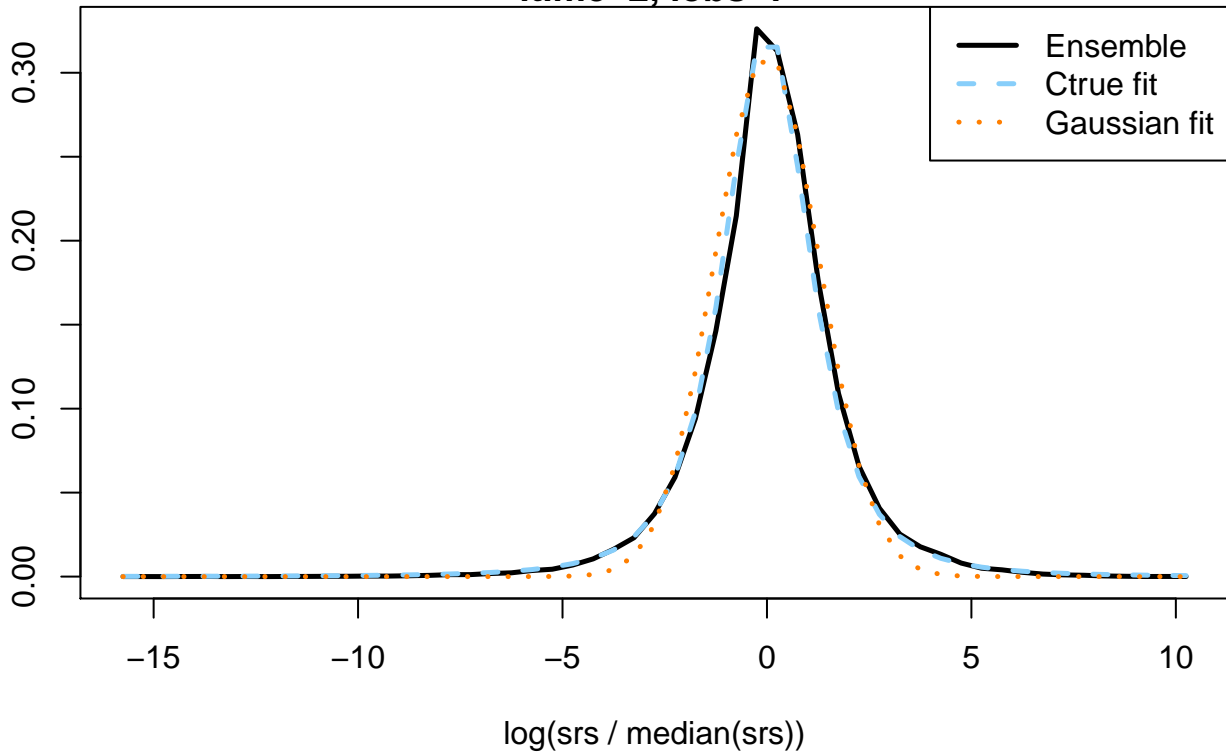

— Ensemble  
- - Ctrue fit  
... Gaussian fit

itime=2, iobs=8

density

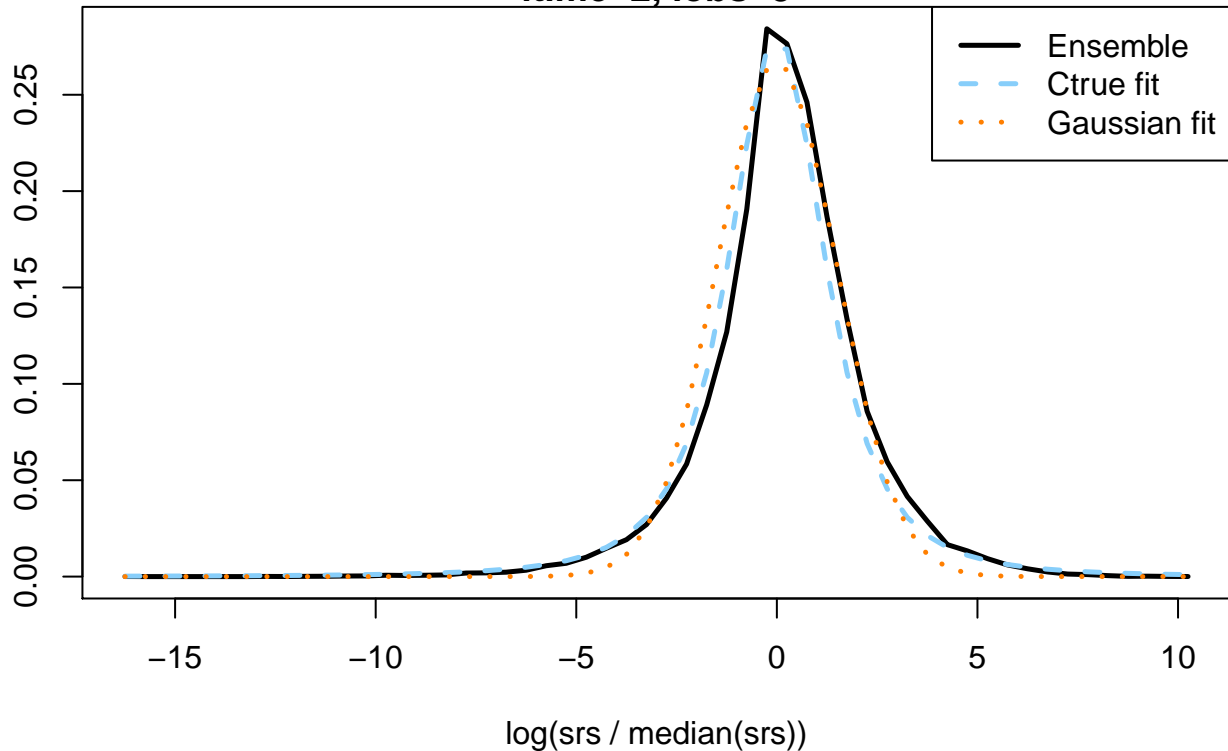

— Ensemble  
- - Ctrue fit  
... Gaussian fit

itime=2, iobs=9

density

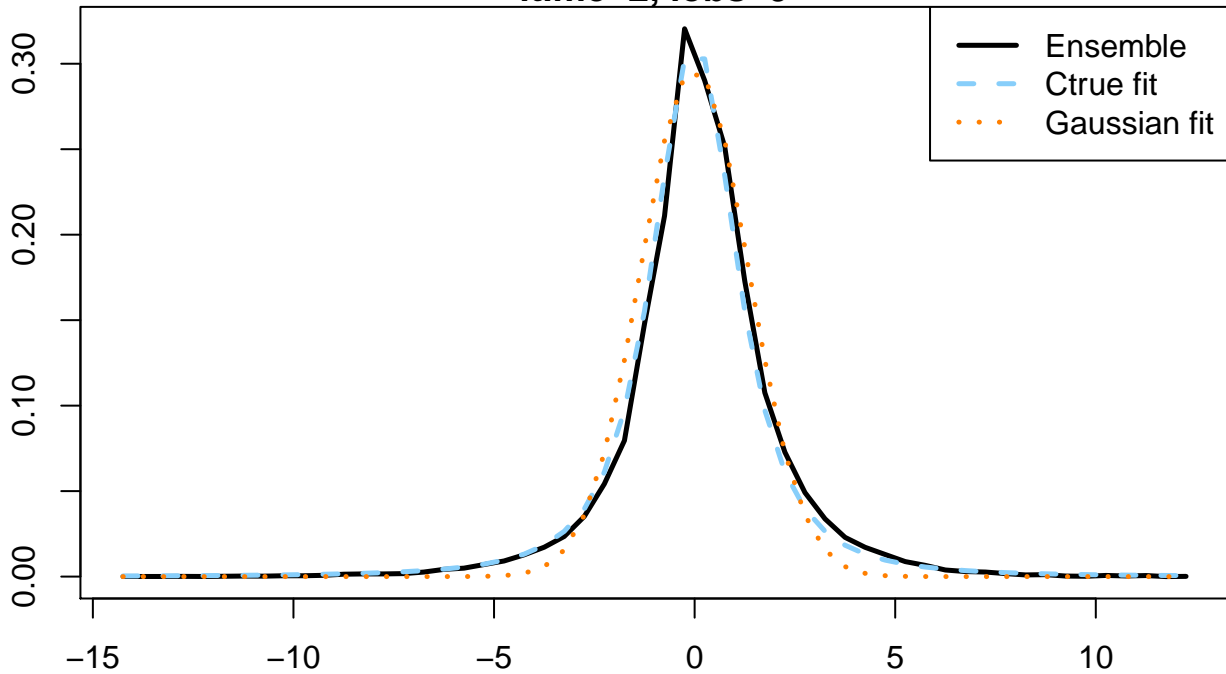

— Ensemble  
- - Ctrue fit  
... Gaussian fit

$\log(\text{srs} / \text{median}(\text{srs}))$

itime=3, iobs=10

density

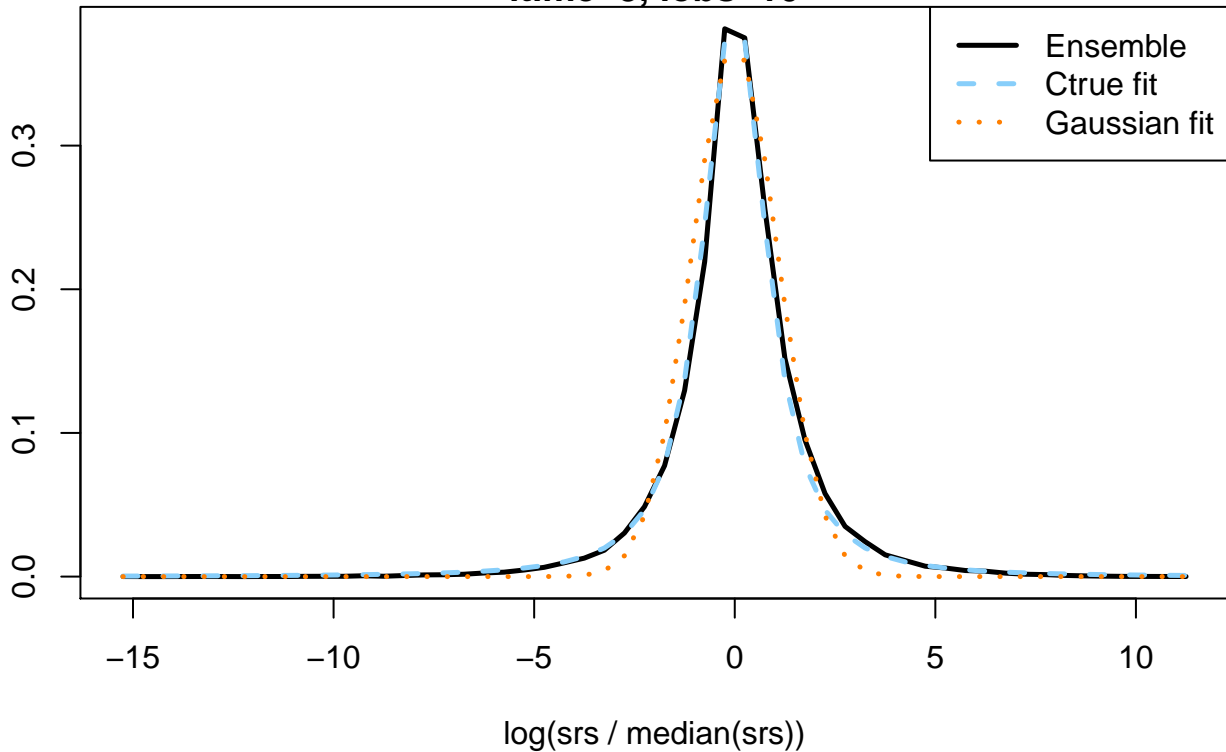

— Ensemble  
- - Ctrue fit  
... Gaussian fit

itime=3, iobs=11

density

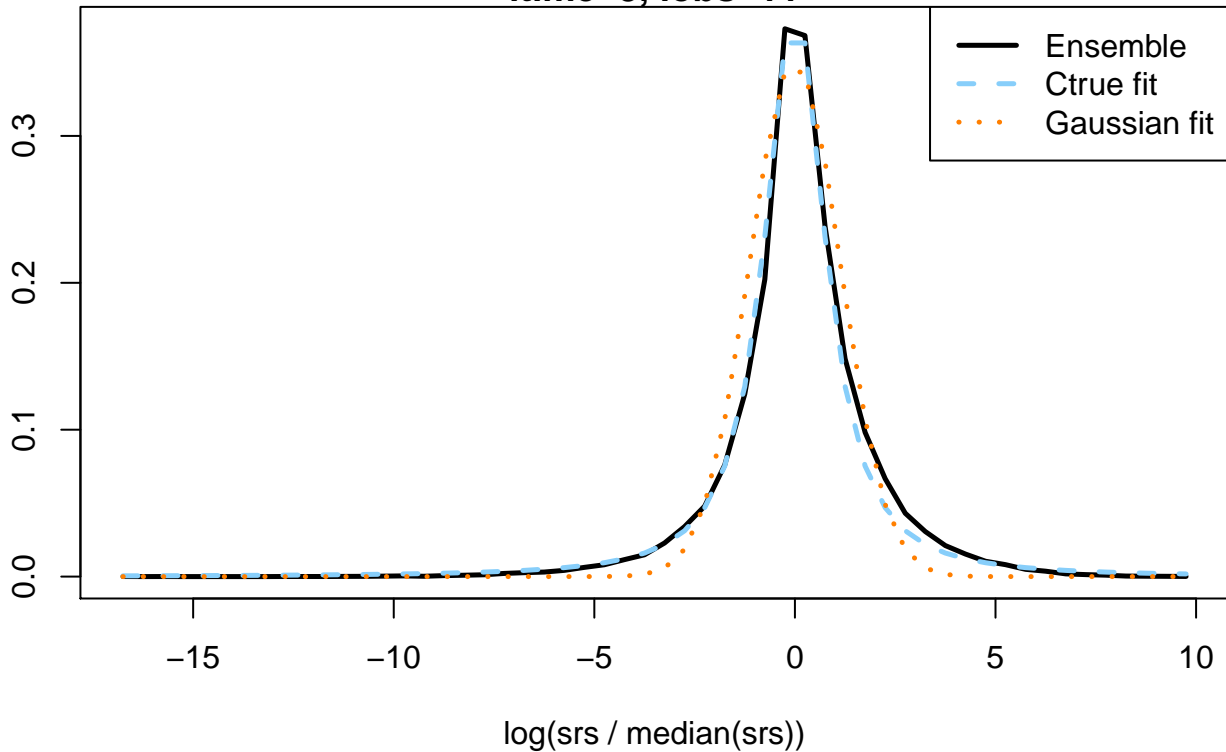

itime=3, iobs=12

density

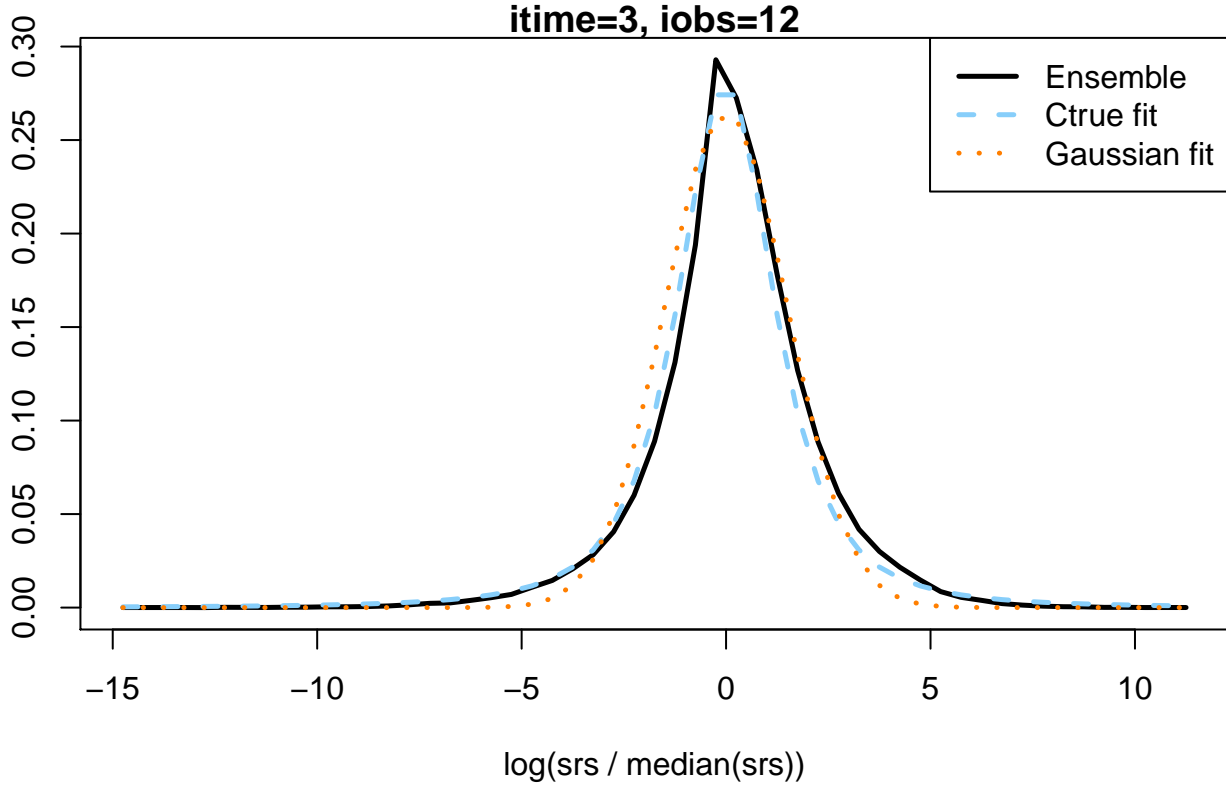



itime=3, iobs=1

density

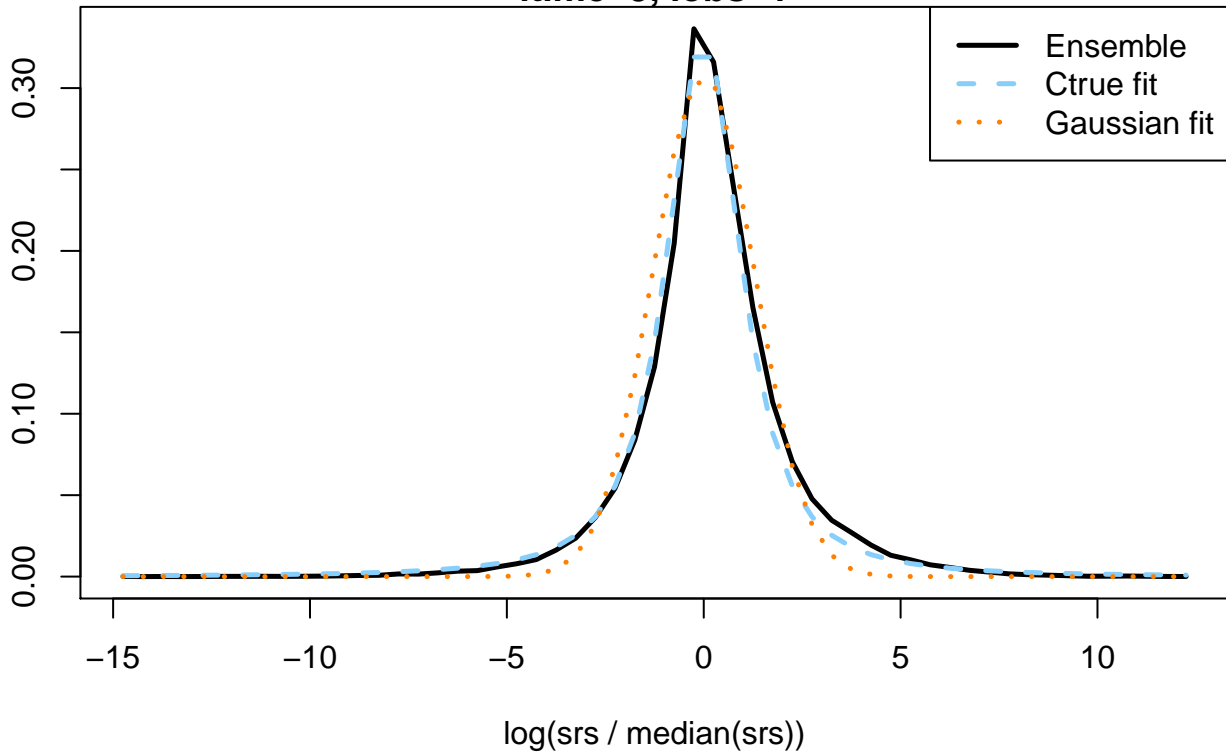

— Ensemble  
- - Ctrue fit  
... Gaussian fit

itime=3, iobs=2

density

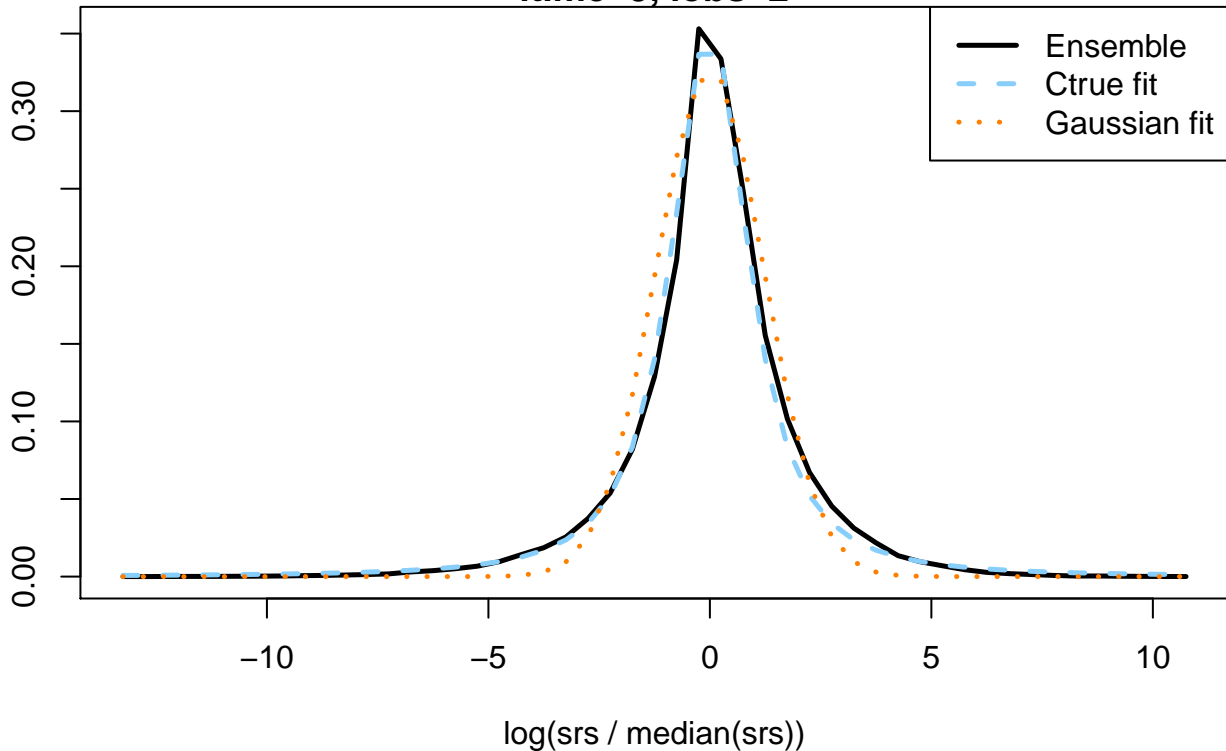

itime=3, iobs=3

density

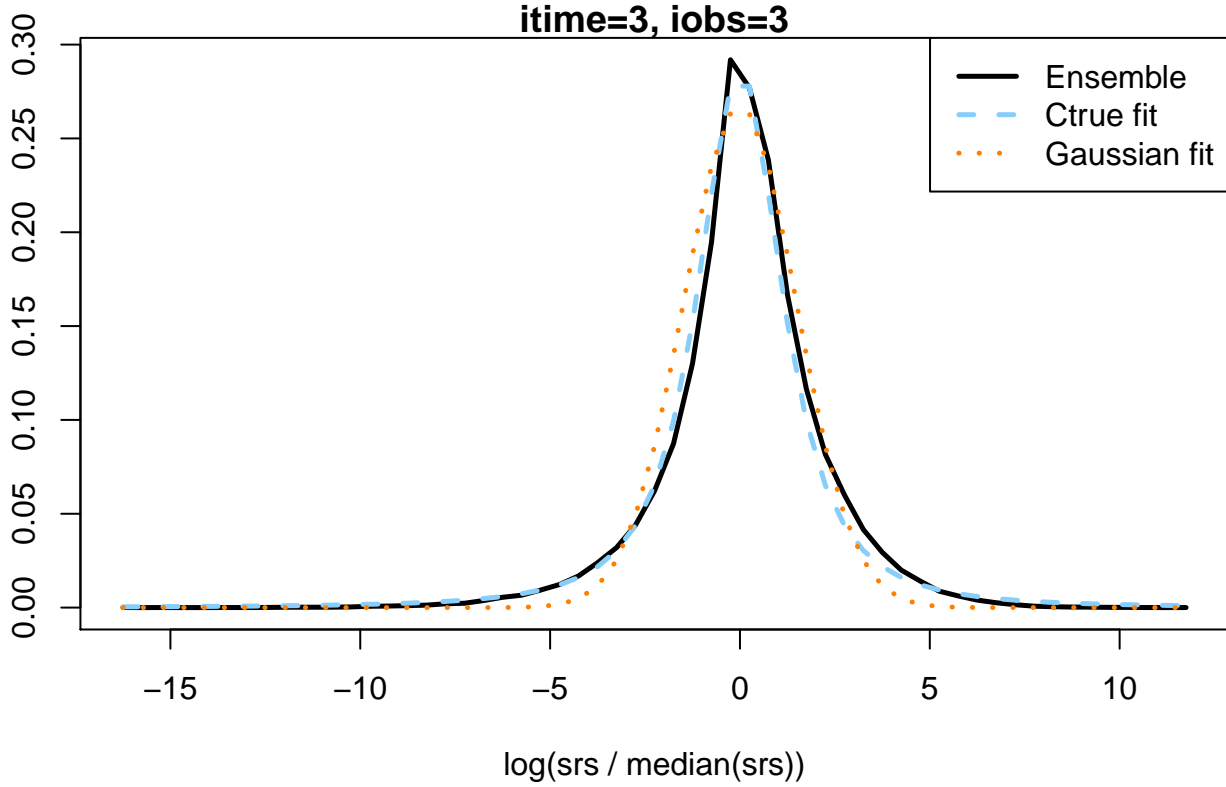

itime=3, iobs=4

density

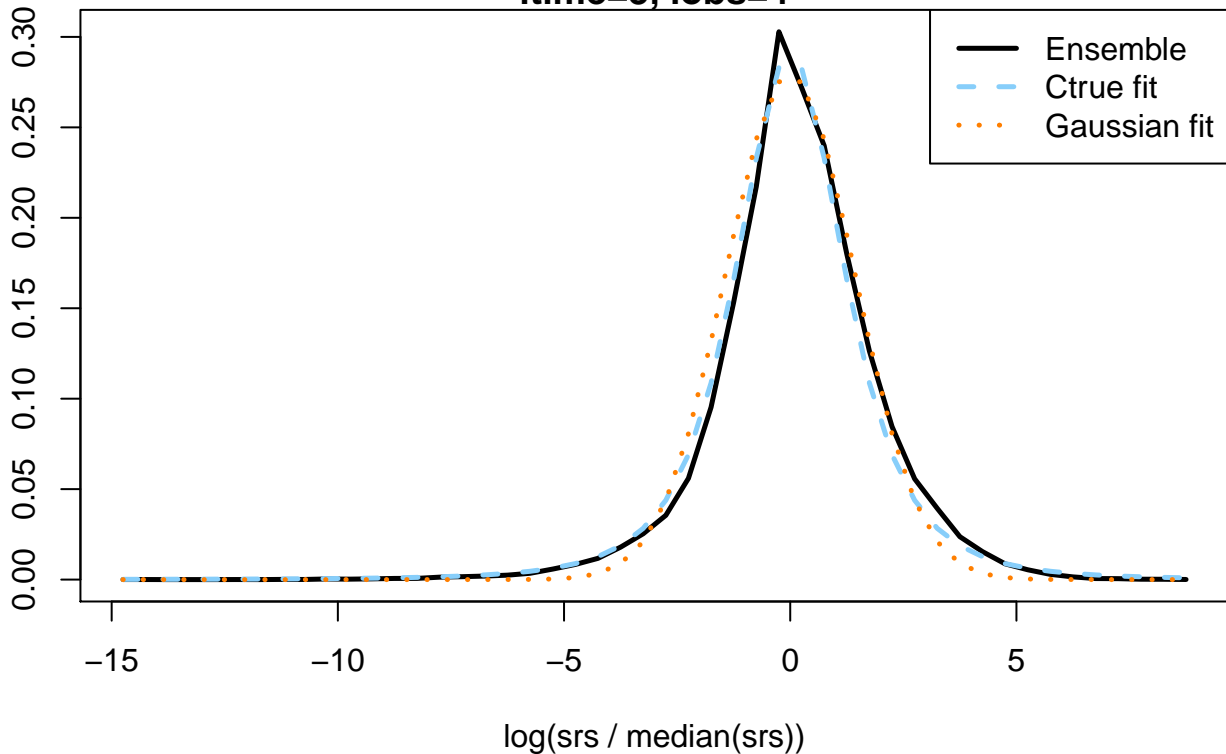

itime=3, iobs=5

density

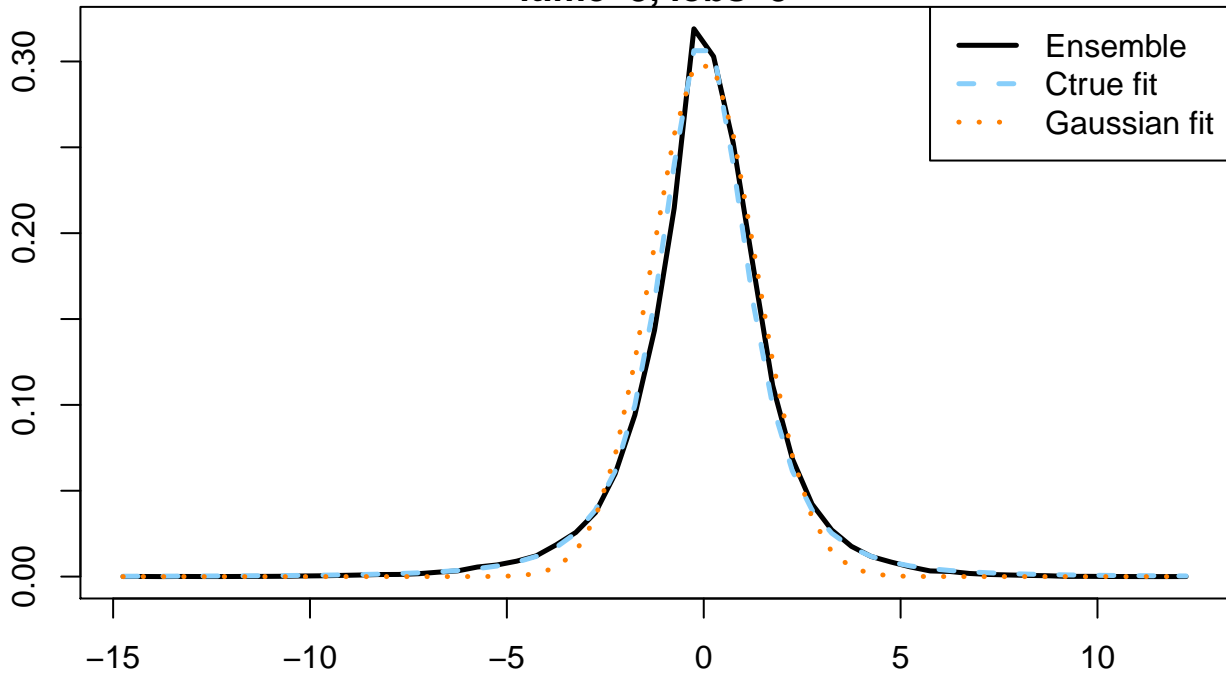

— Ensemble  
- - Ctrue fit  
... Gaussian fit

$\log(\text{srs} / \text{median}(\text{srs}))$

itime=3, iobs=6

density

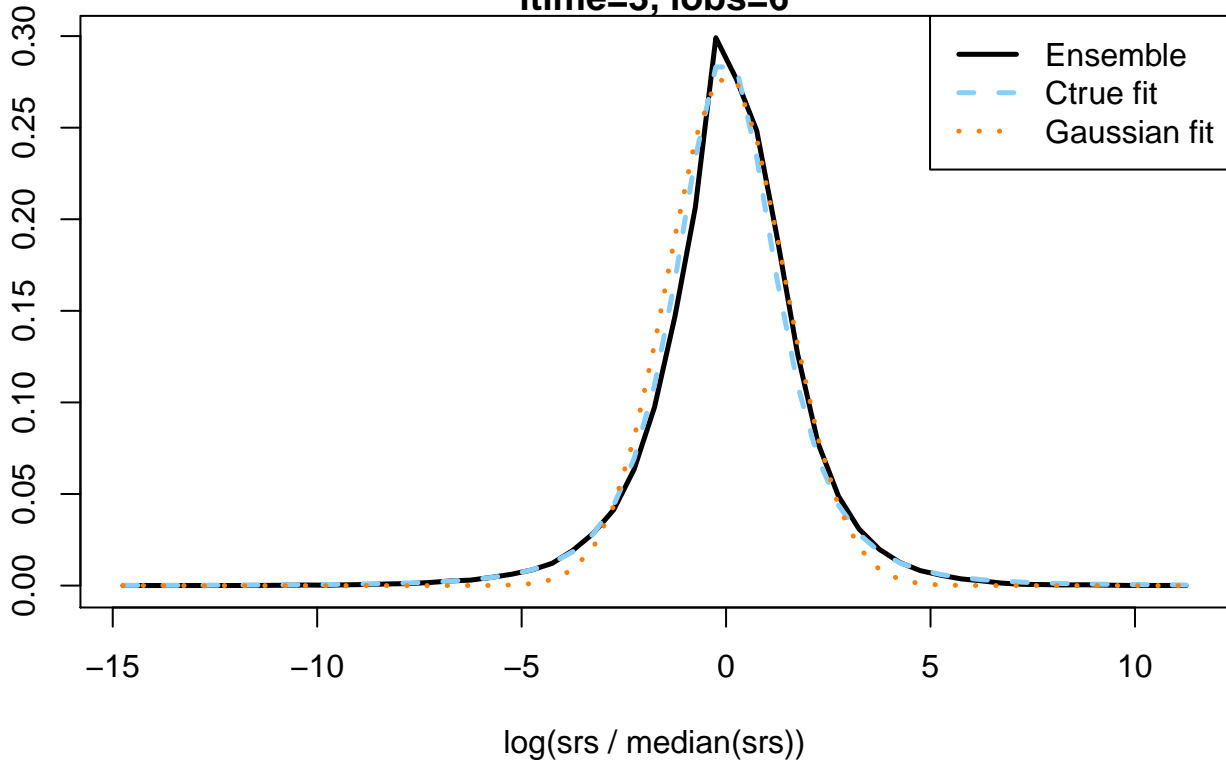

itime=3, iobs=7

density

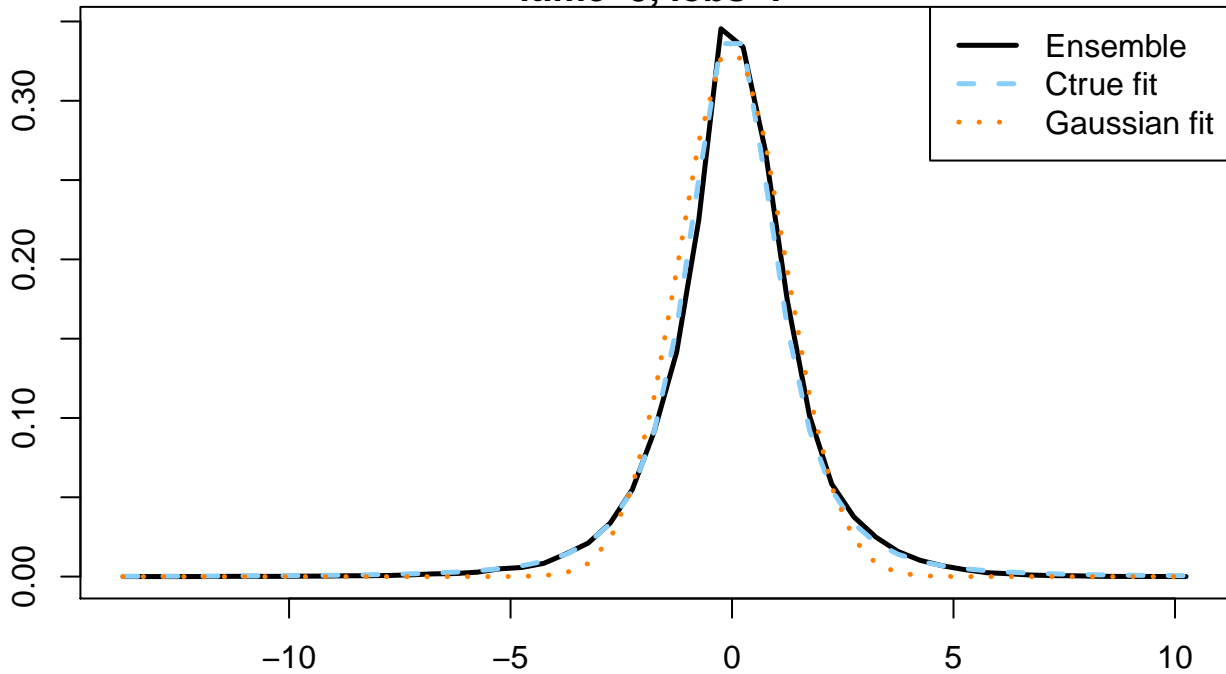

— Ensemble  
- - Ctrue fit  
... Gaussian fit

-10

-5

0

5

10

$\log(\text{srs} / \text{median}(\text{srs}))$

itime=3, iobs=8

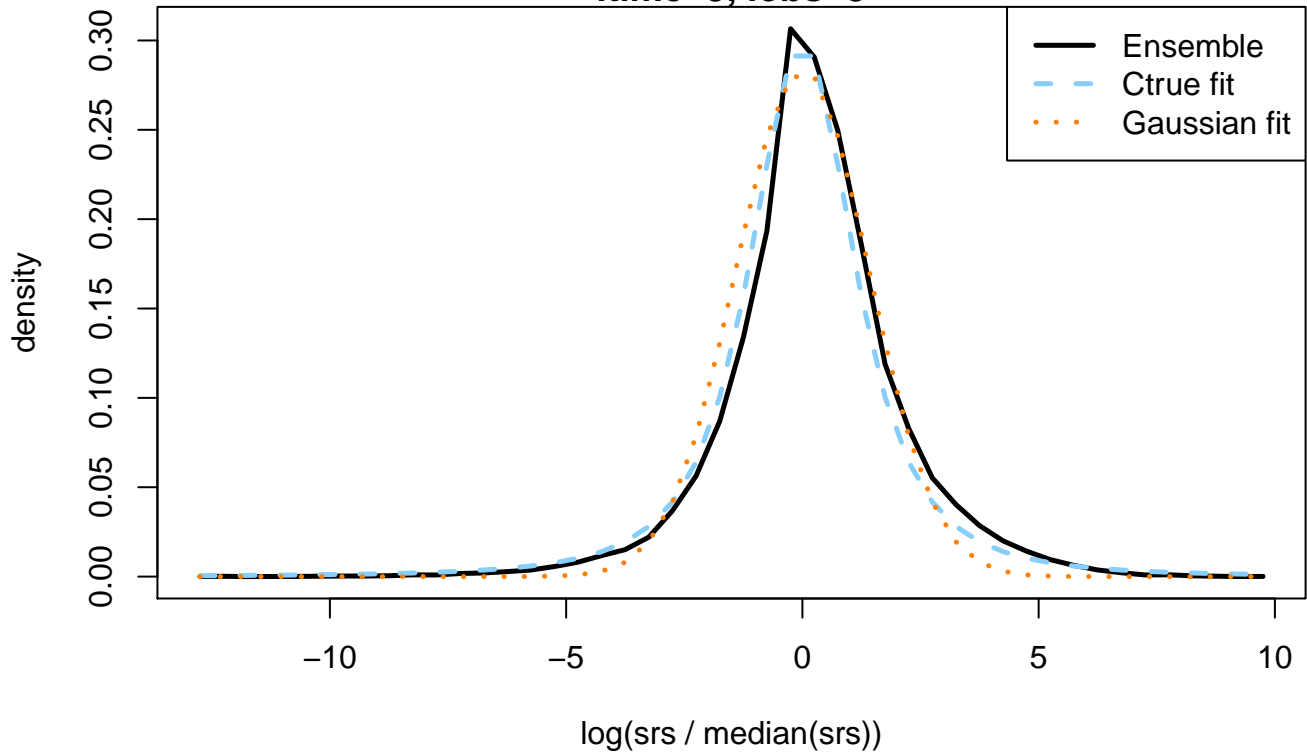



itime=3, iobs=9

density

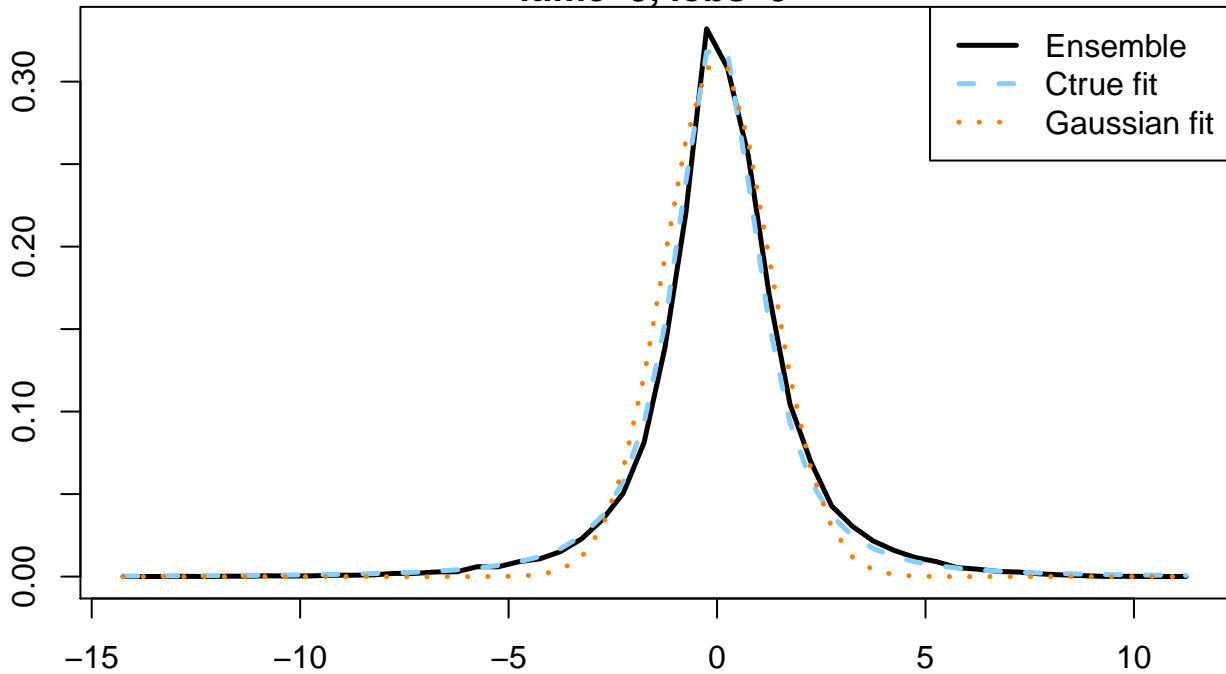

log(srs / median(srs))

itime=4, iobs=10

density

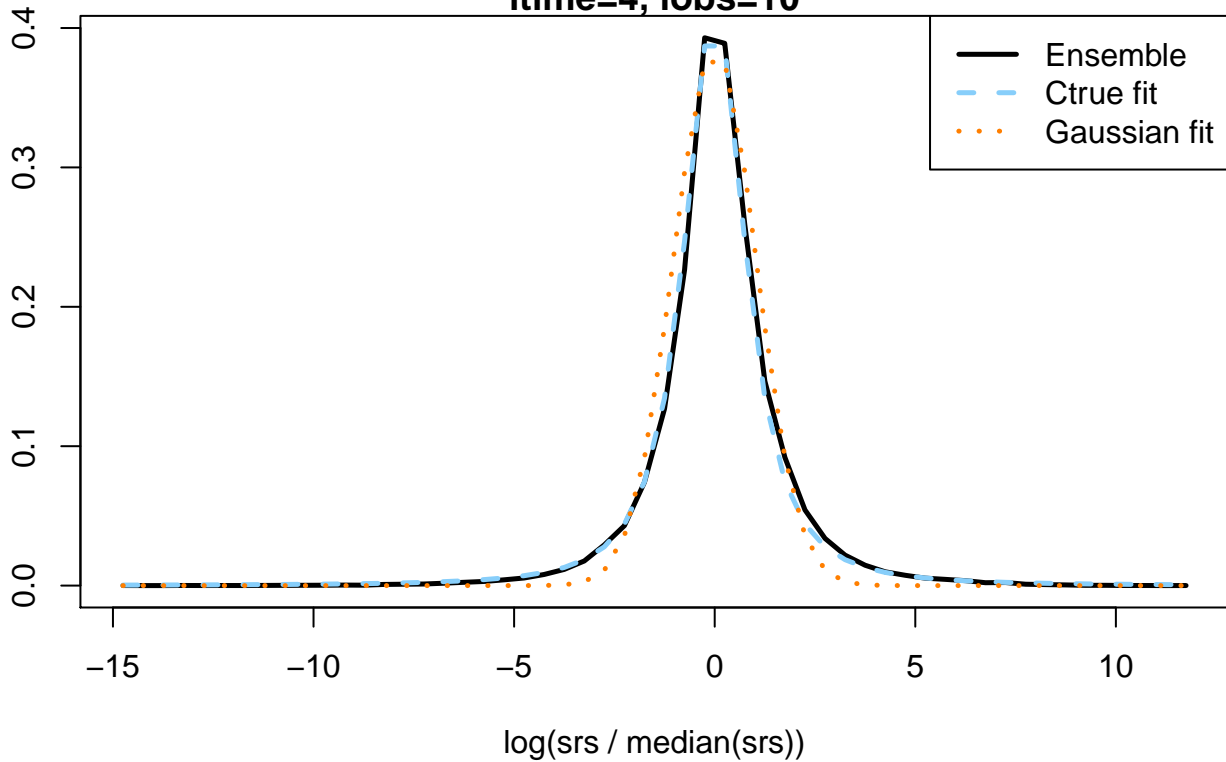

itime=4, iobs=11

density

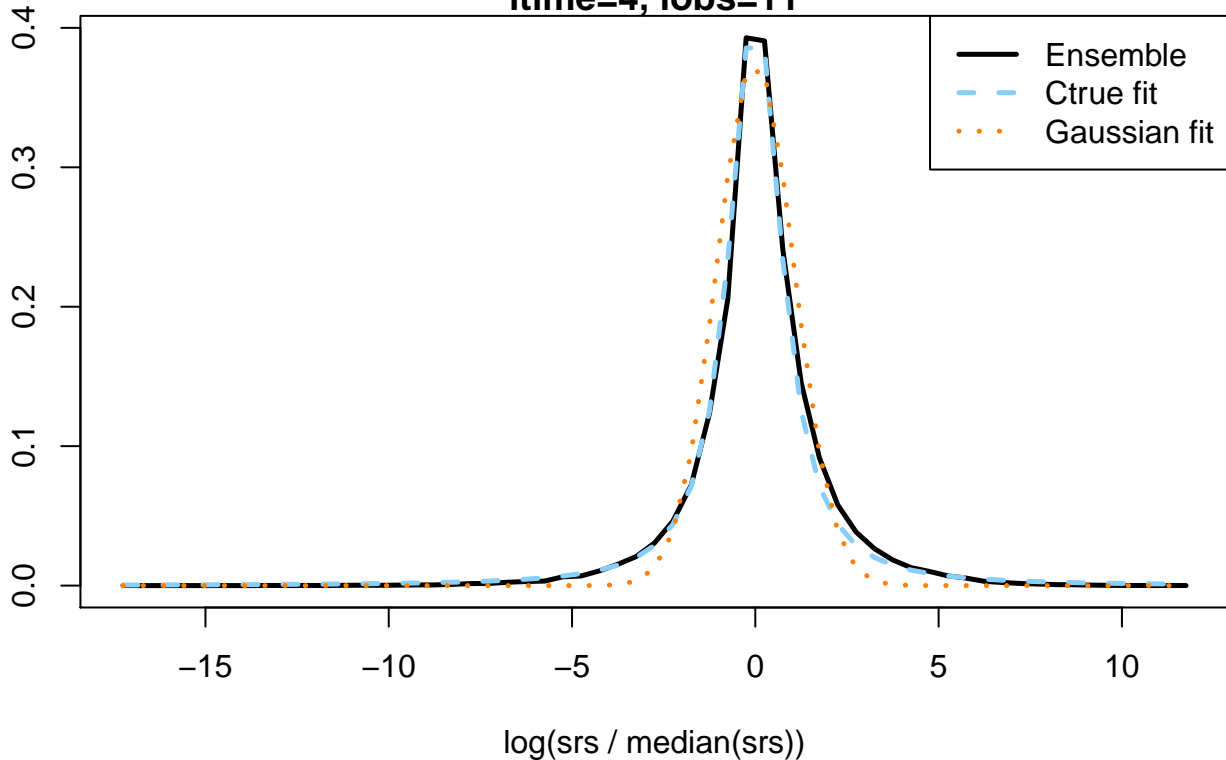

— Ensemble  
- - Ctrue fit  
... Gaussian fit

itime=4, iobs=12

density

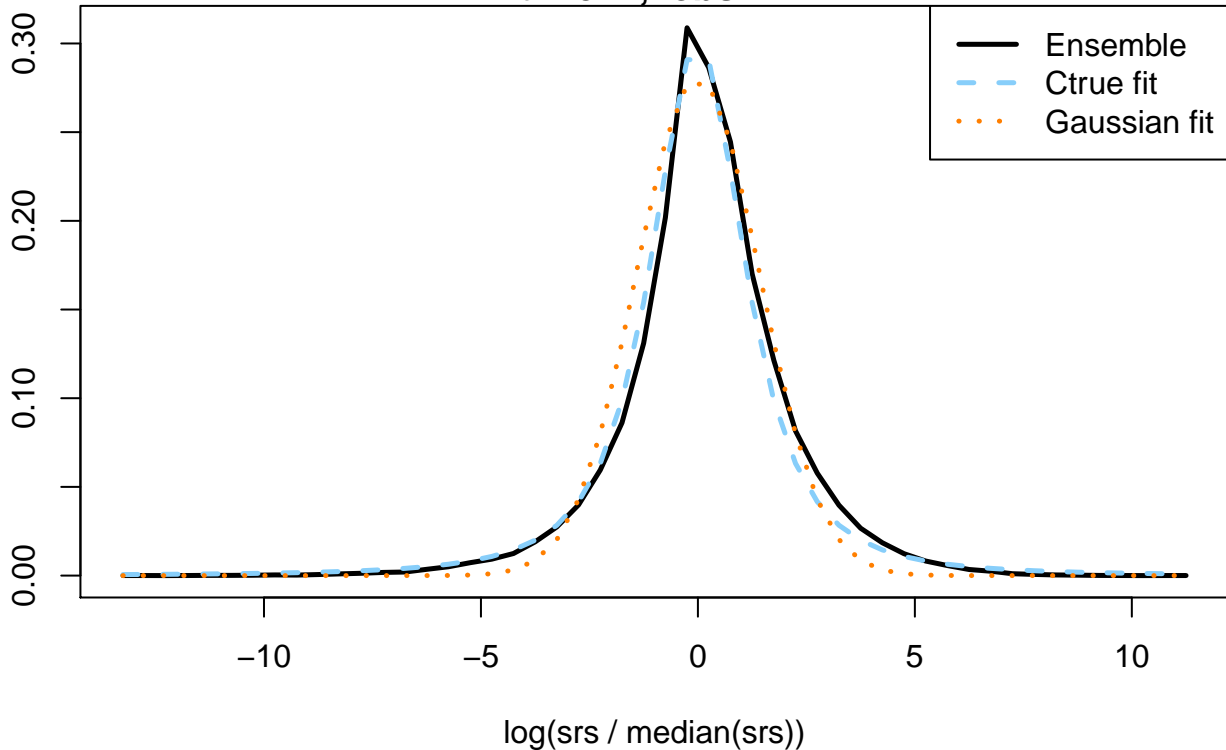

itime=4, iobs=1

density

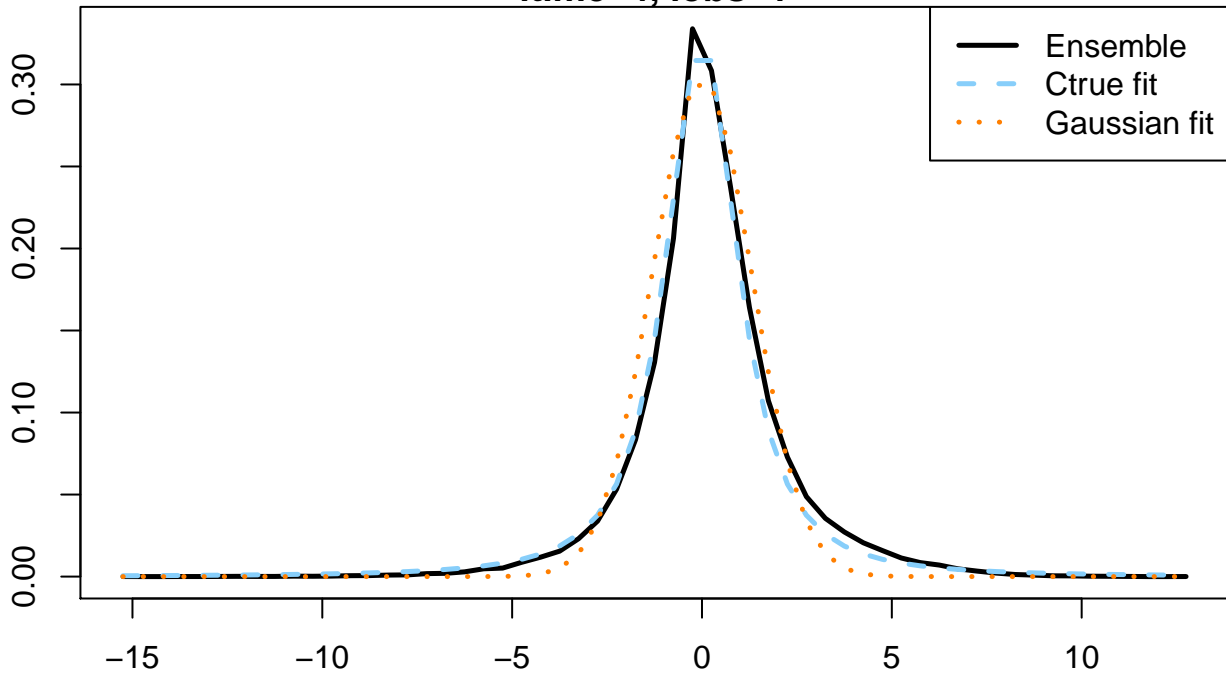

— Ensemble  
- - Ctrue fit  
... Gaussian fit

$\log(\text{srs} / \text{median}(\text{srs}))$

itime=4, iobs=2

density

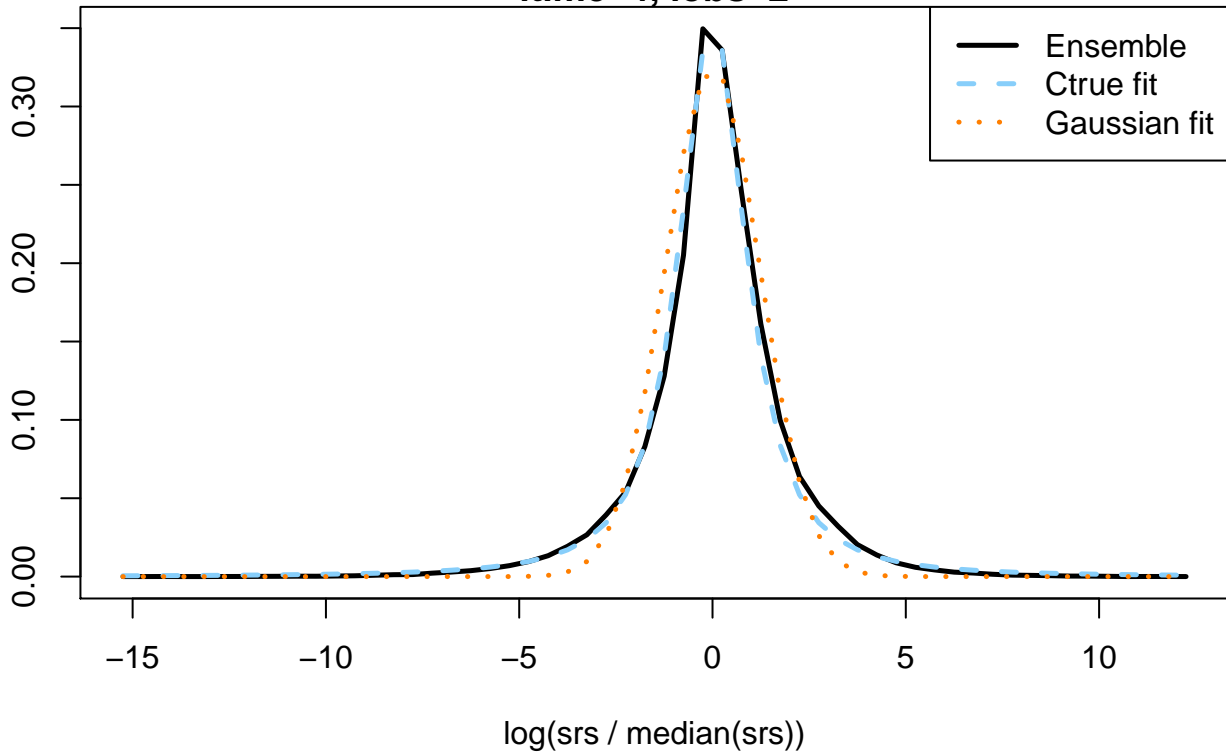

itime=4, iobs=3

density

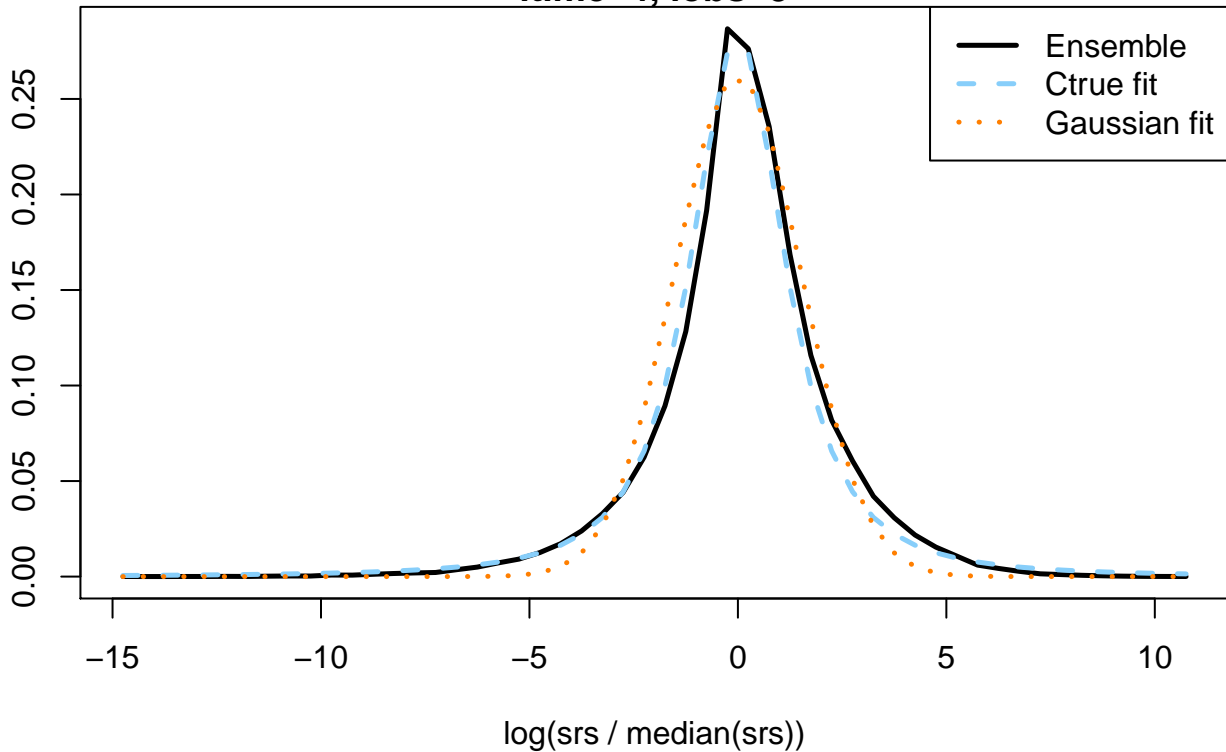

itime=4, iobs=4

density

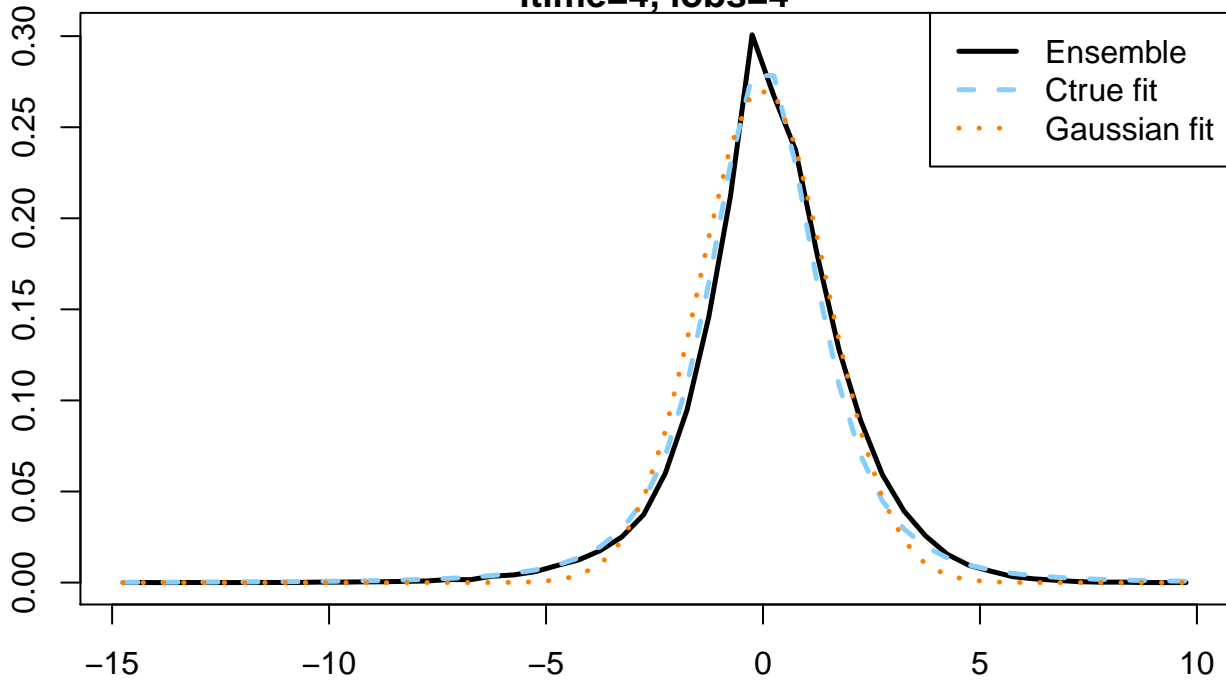

— Ensemble  
- - Ctrue fit  
... Gaussian fit

$\log(\text{srs} / \text{median}(\text{srs}))$



itime=4, iobs=5

density

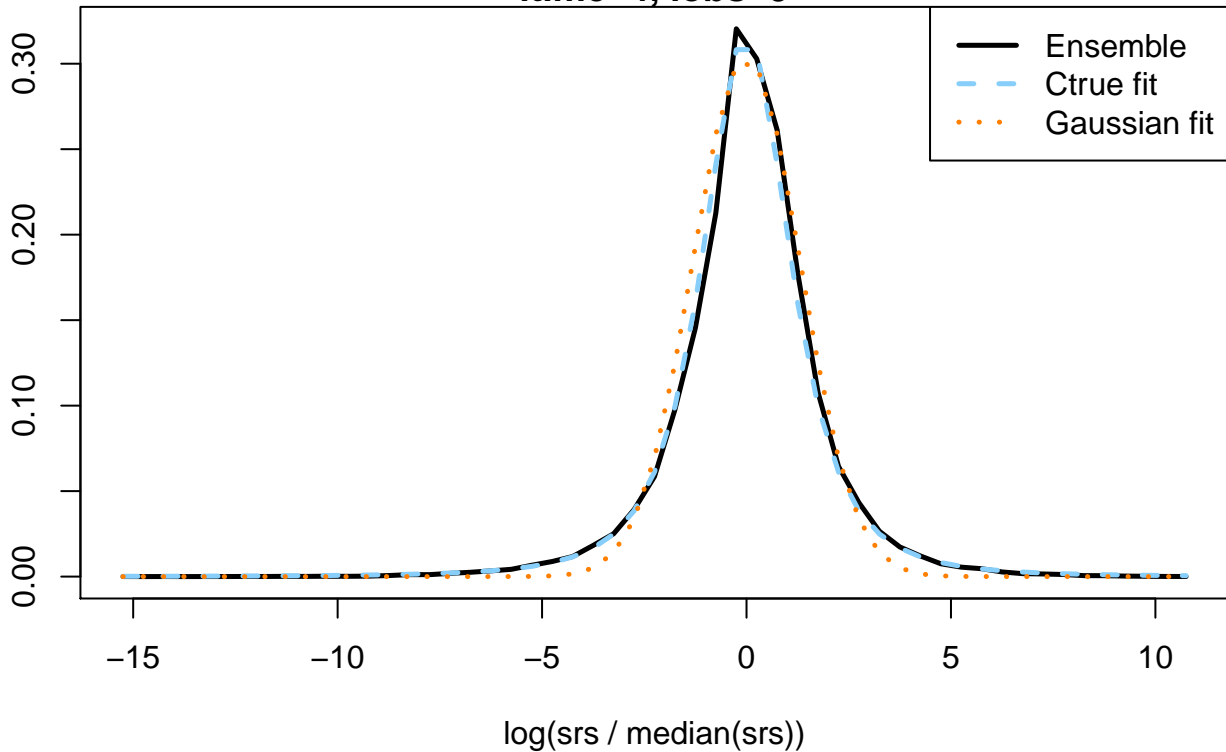

— Ensemble  
- - Ctrue fit  
... Gaussian fit

itime=4, iobs=6

density

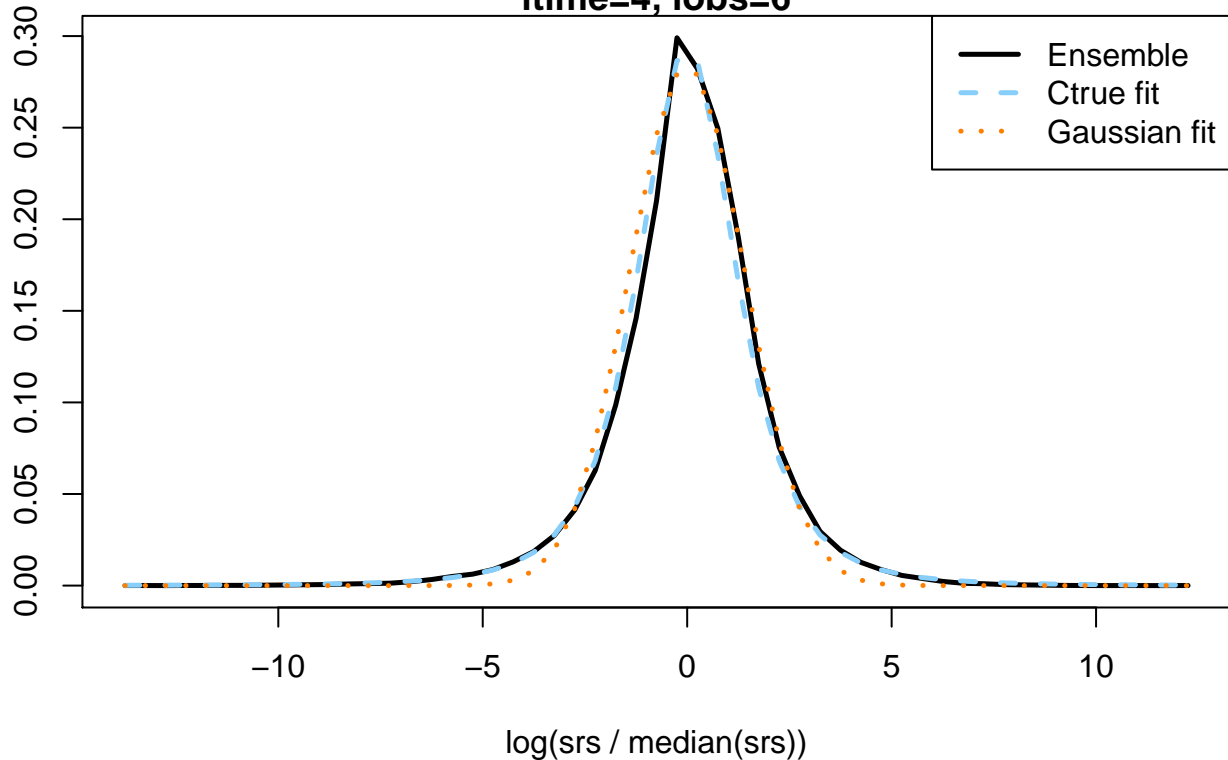

itime=4, iobs=7

density

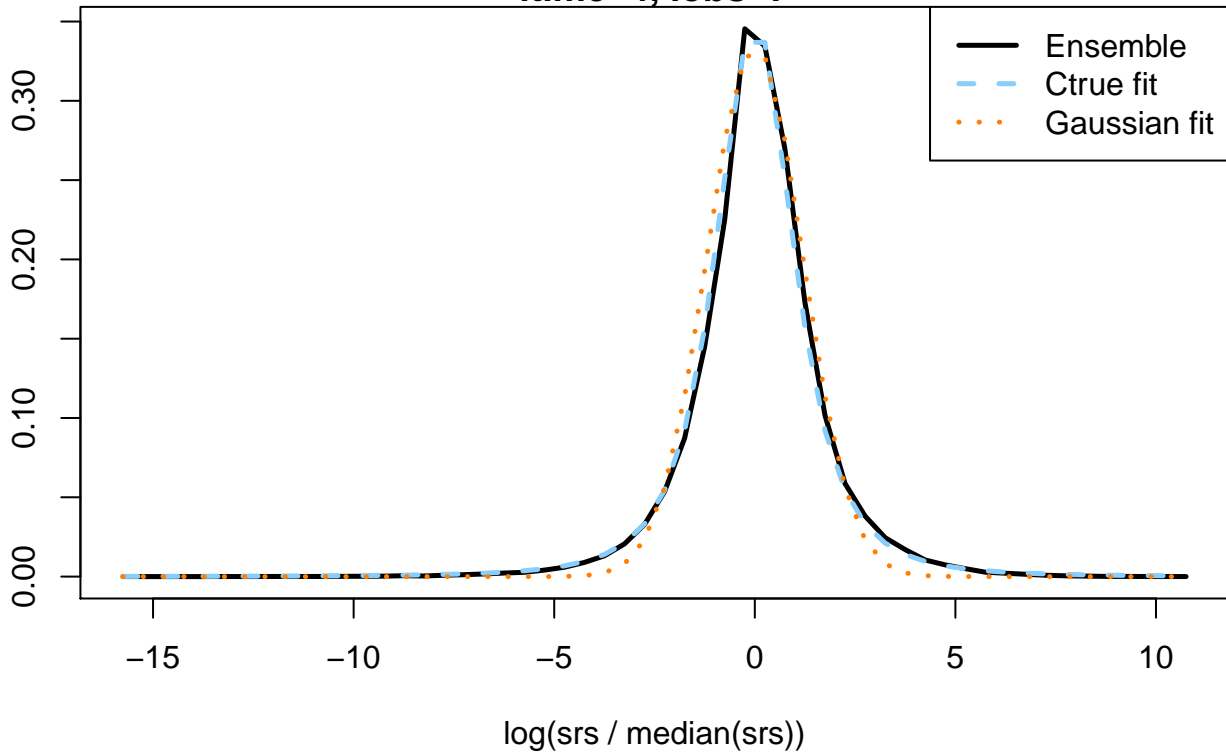

— Ensemble  
- - Ctrue fit  
... Gaussian fit

itime=4, iobs=8

density

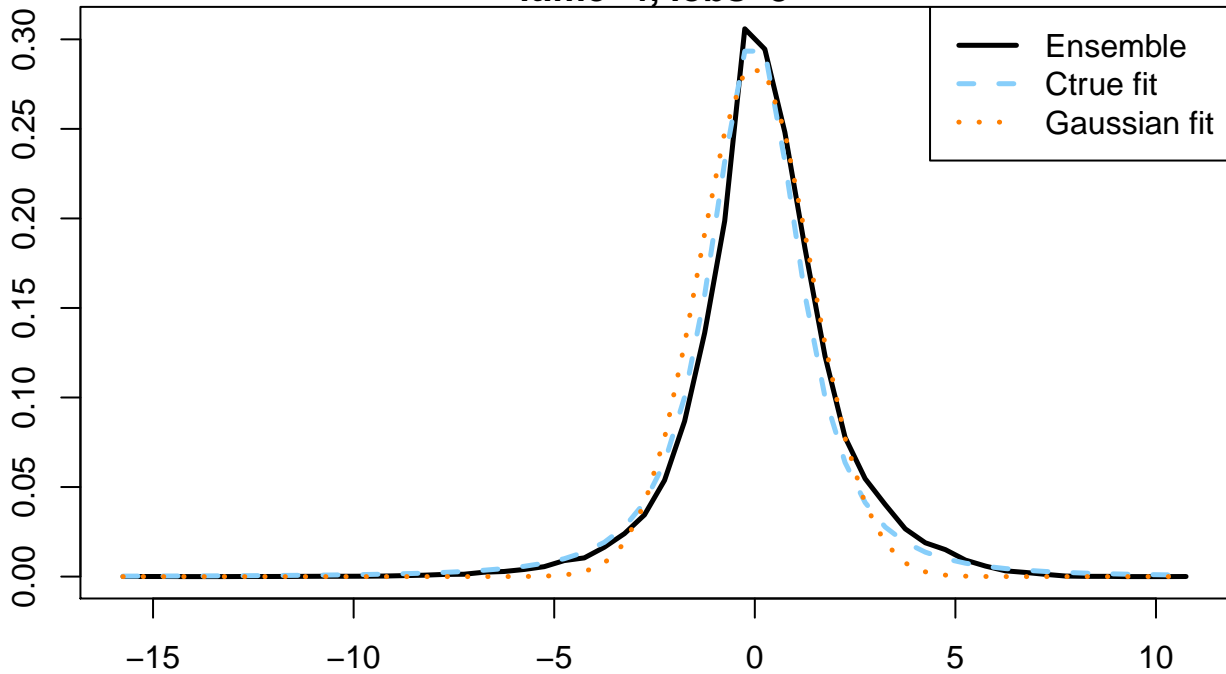

— Ensemble  
- - Ctrue fit  
... Gaussian fit

$\log(\text{srs} / \text{median}(\text{srs}))$

itime=4, iobs=9

density

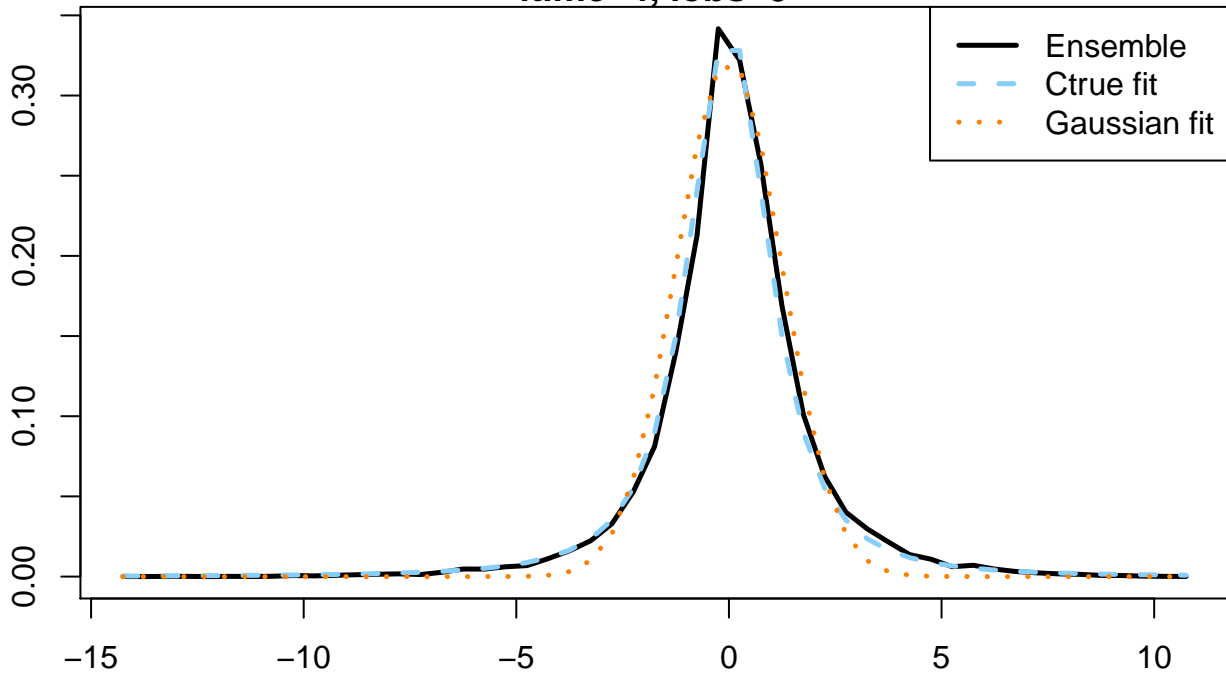

- Ensemble
- - Ctrue fit
- ... Gaussian fit

$\log(\text{srs} / \text{median}(\text{srs}))$

itime=5, iobs=10

density

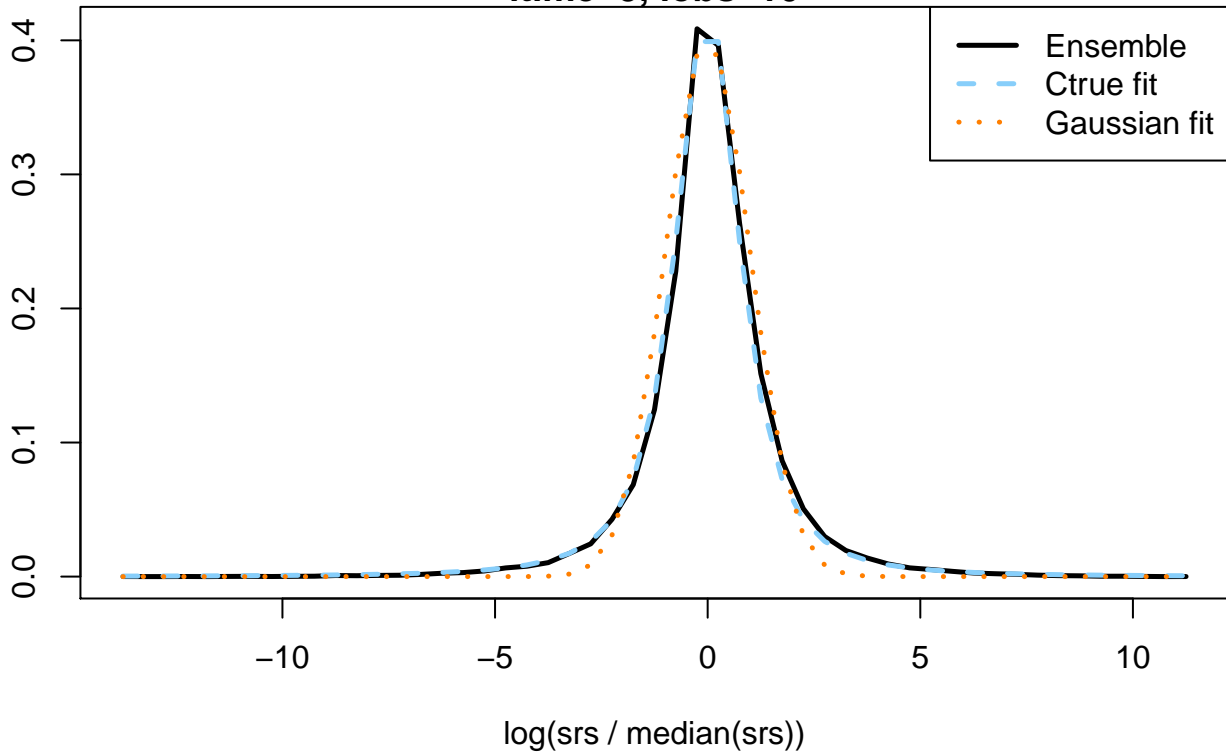

— Ensemble  
- - Ctrue fit  
... Gaussian fit

itime=5, iobs=11

density

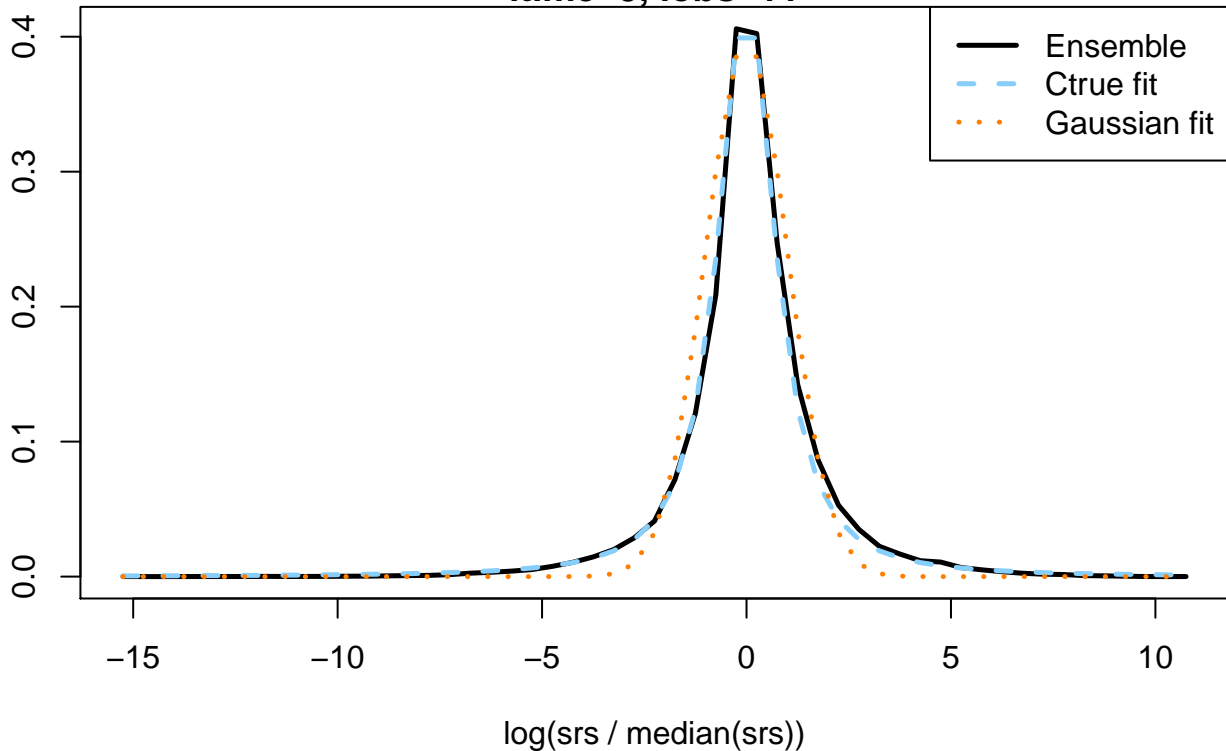

itime=5, iobs=12

density

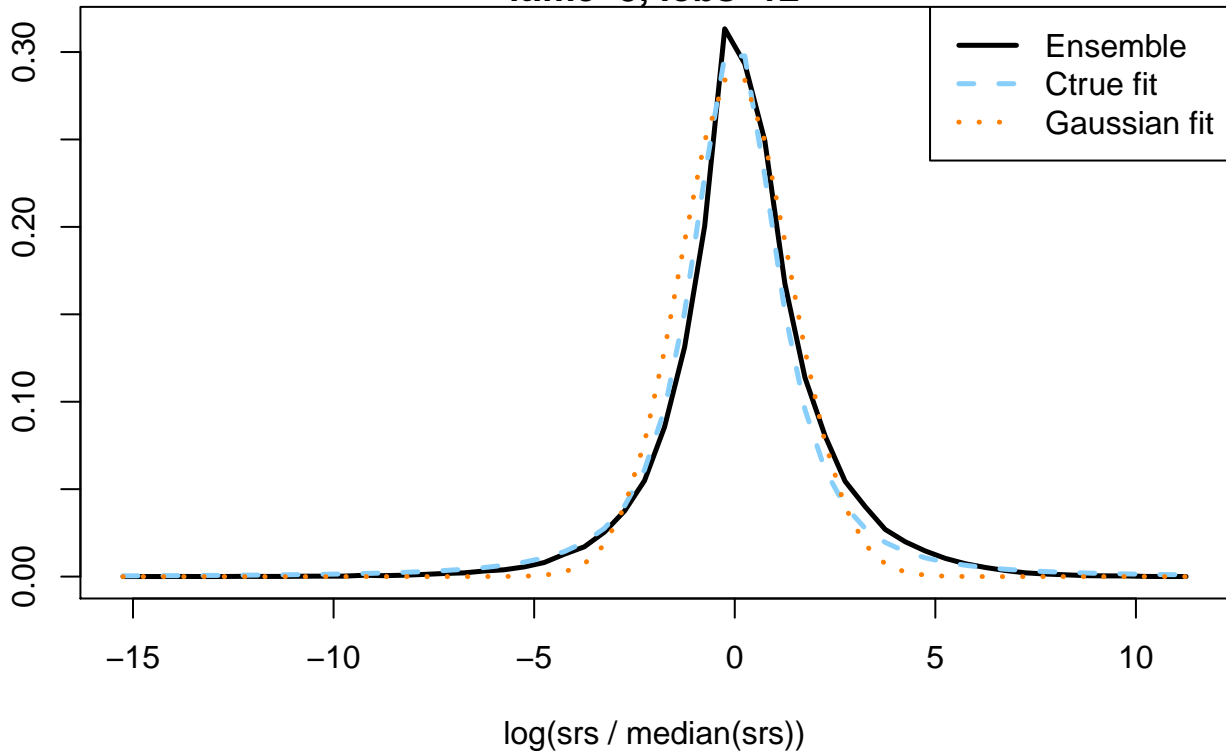



itime=5, iobs=1

density

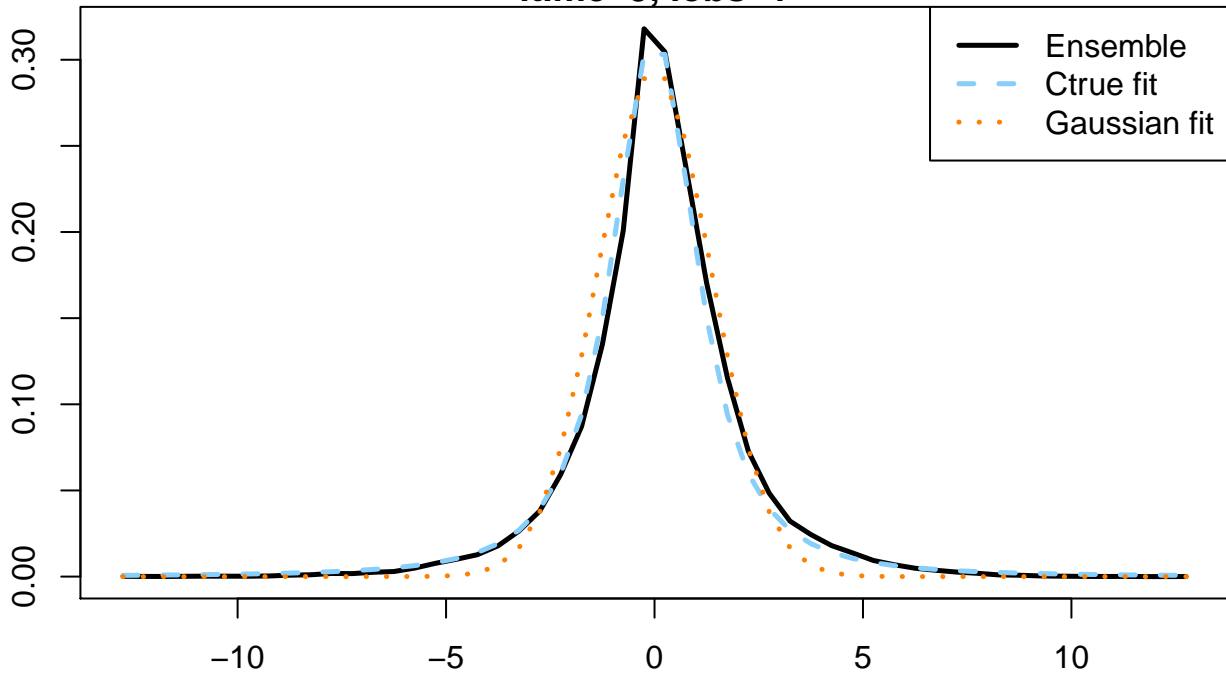

log(srs / median(srs))

itime=5, iobs=2

density

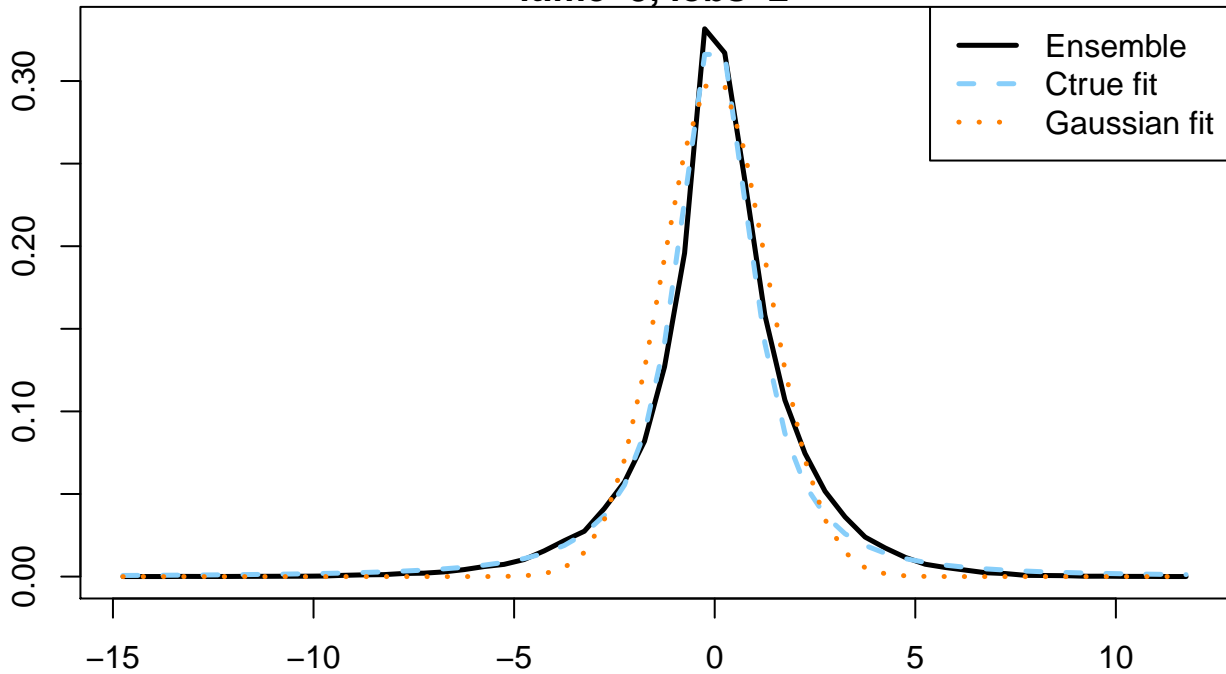

— Ensemble  
- - Ctrue fit  
... Gaussian fit

$\log(\text{srs} / \text{median}(\text{srs}))$

itime=5, iobs=3

density

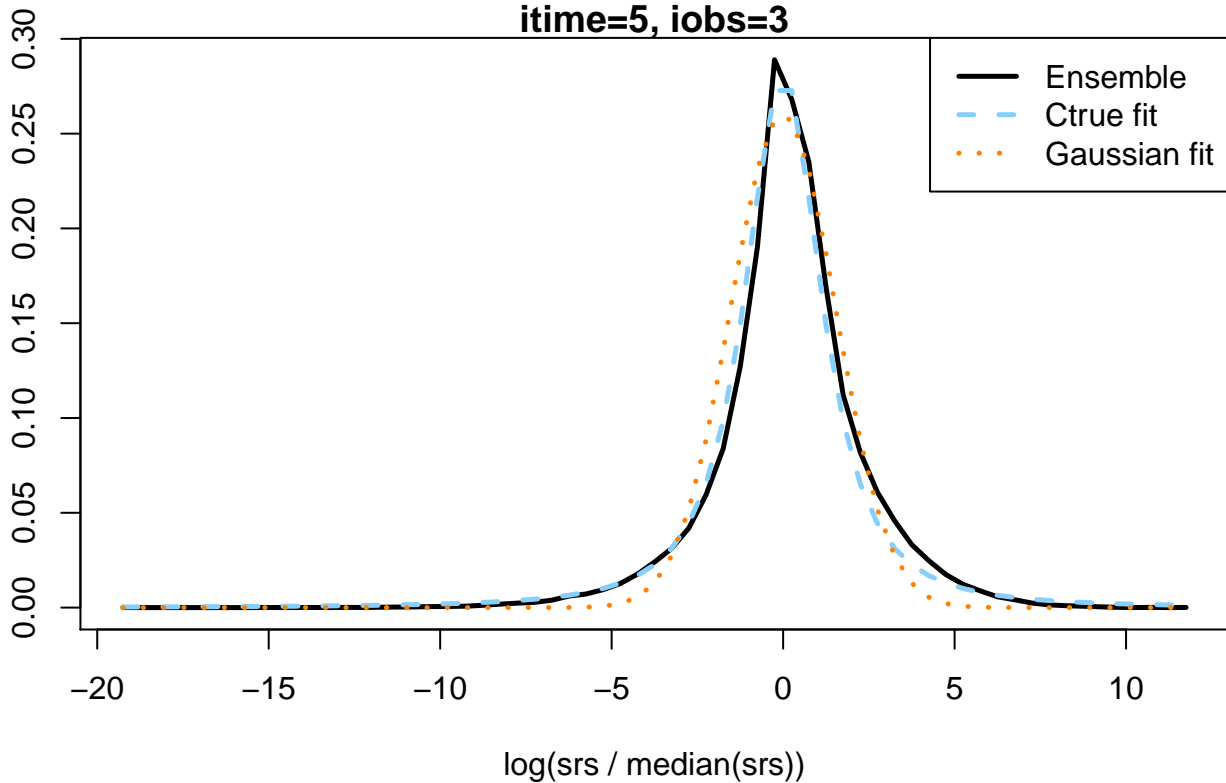

itime=5, iobs=4

density

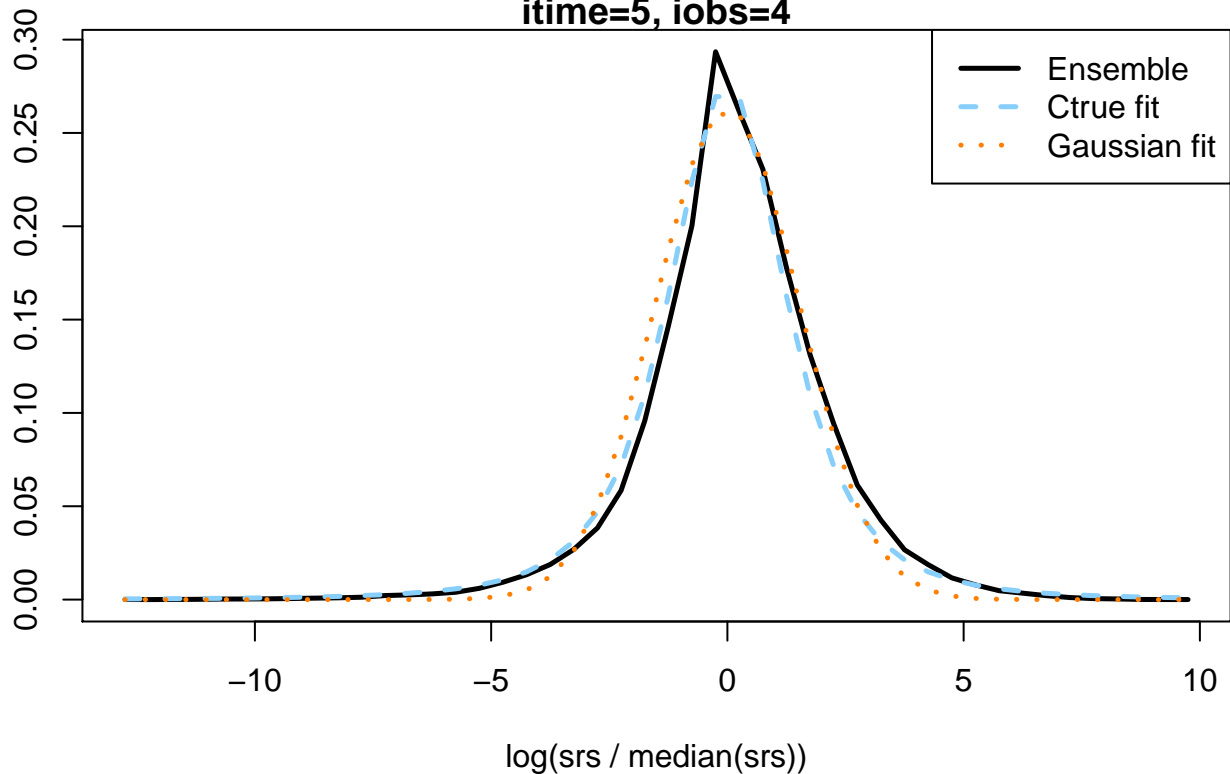

itime=5, iobs=5

density

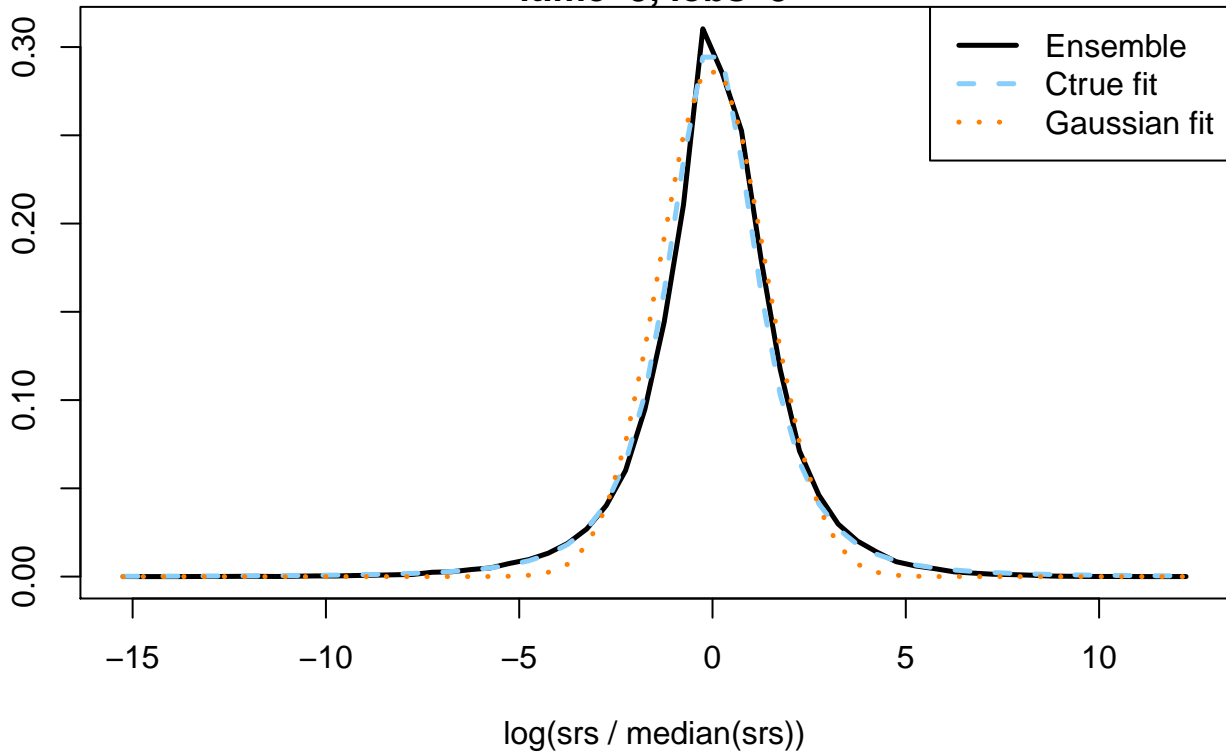

— Ensemble  
- - Ctrue fit  
... Gaussian fit

itime=5, iobs=6

density

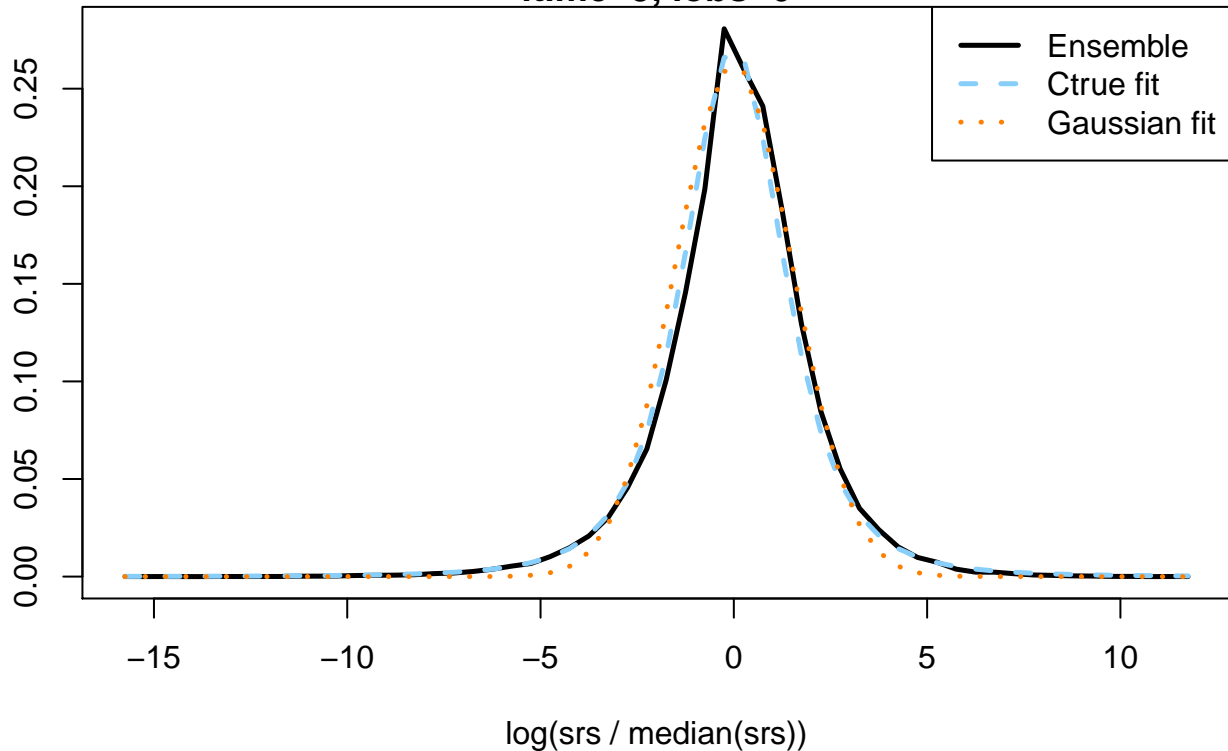

itime=5, iobs=7

density

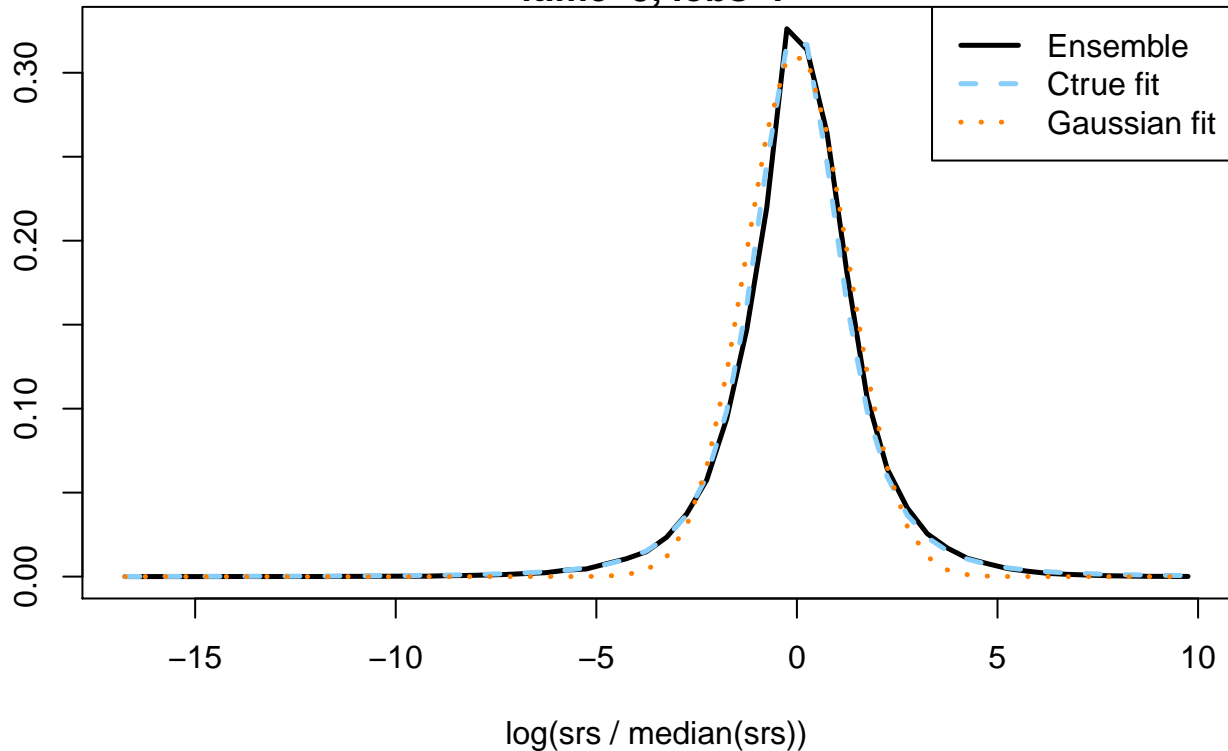

— Ensemble  
- - Ctrue fit  
... Gaussian fit

itime=5, iobs=8

density

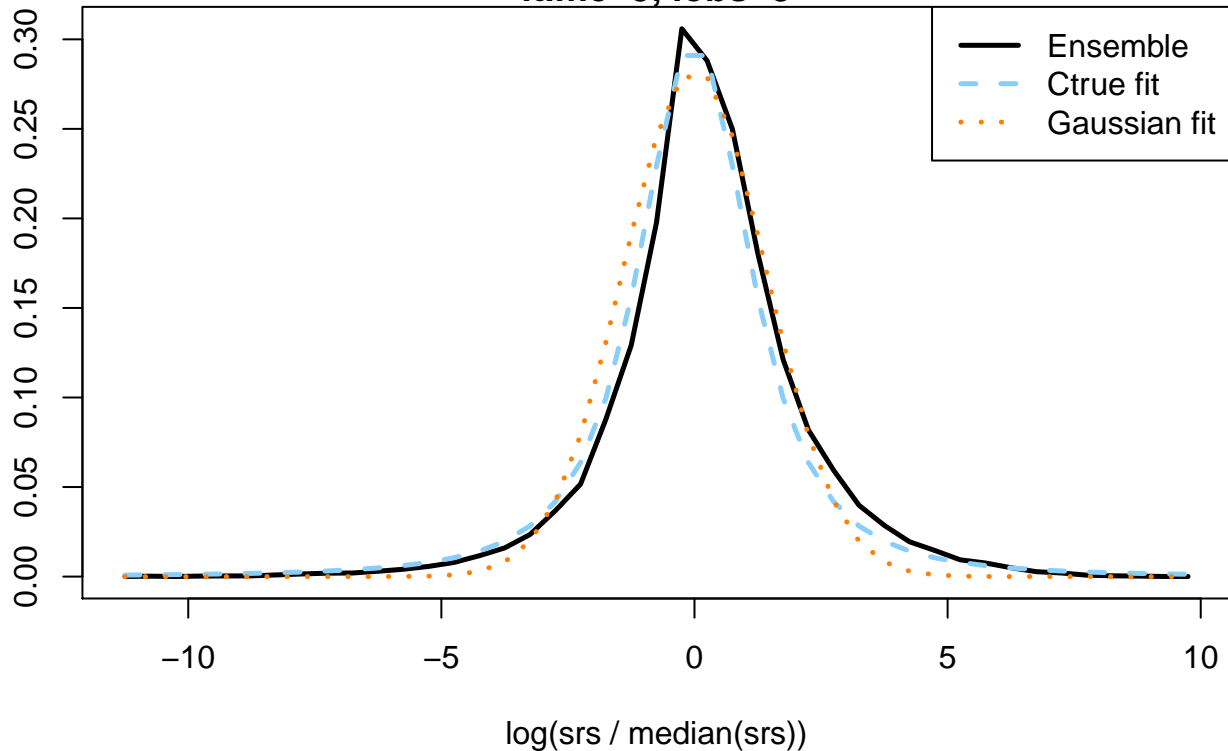

— Ensemble  
- - Ctrue fit  
... Gaussian fit



itime=5, iobs=9

density

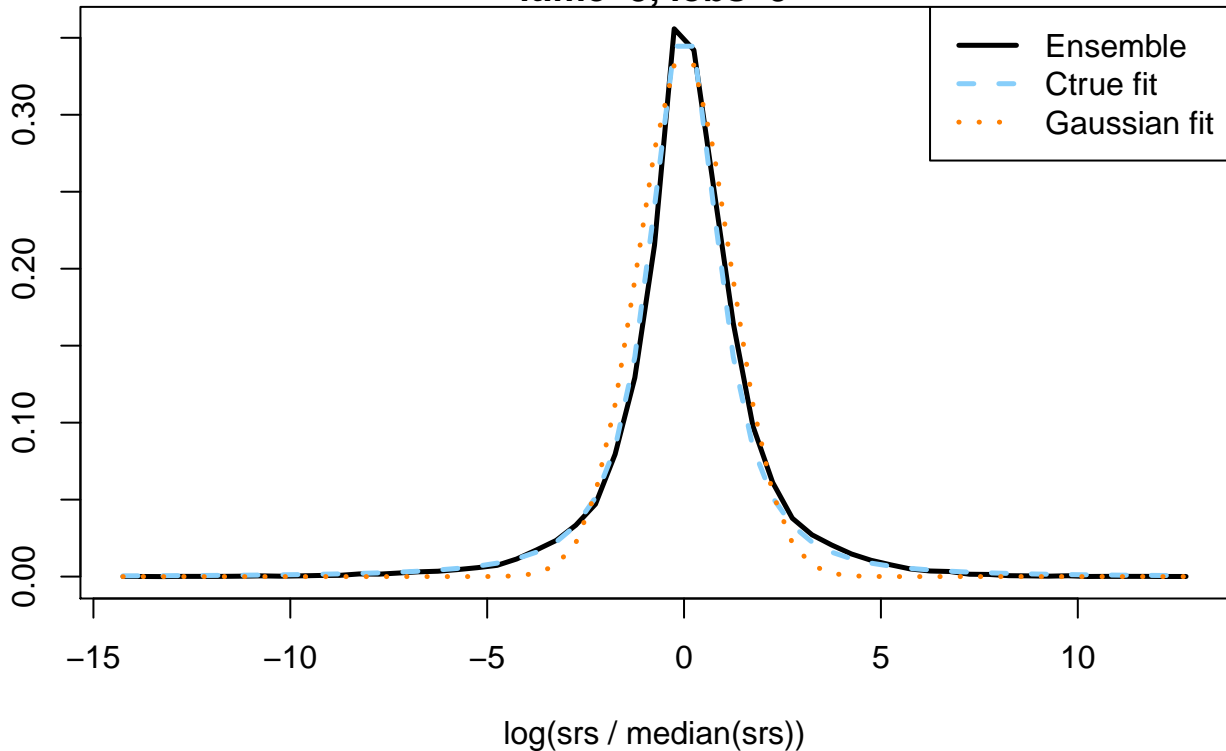

— Ensemble  
- - Ctrue fit  
... Gaussian fit

itime=6, iobs=10

density

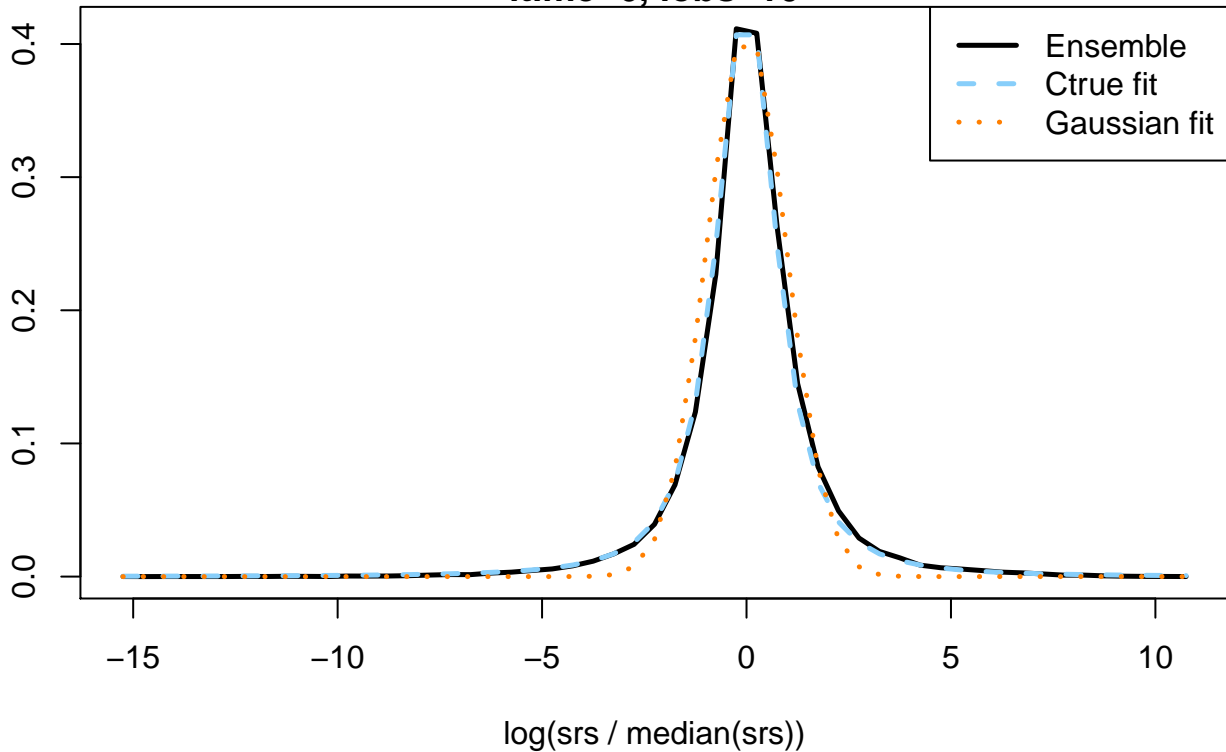

itime=6, iobs=11

density

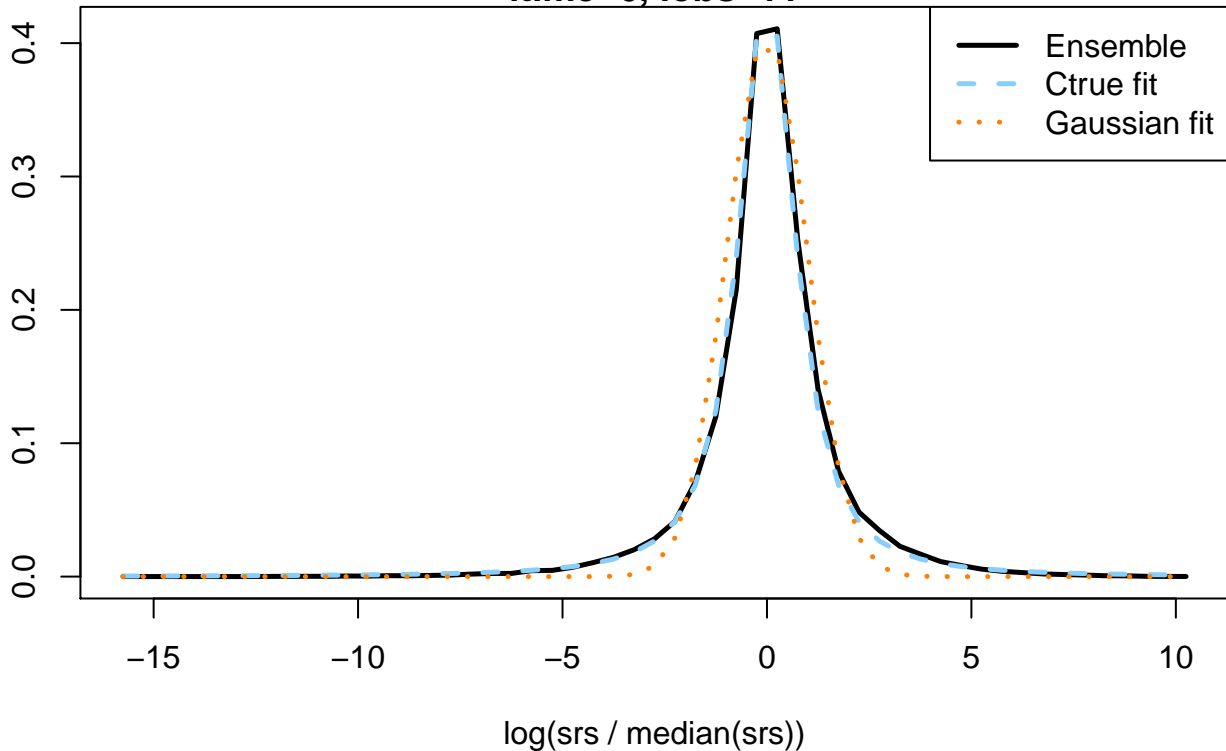

itime=6, iobs=12

density

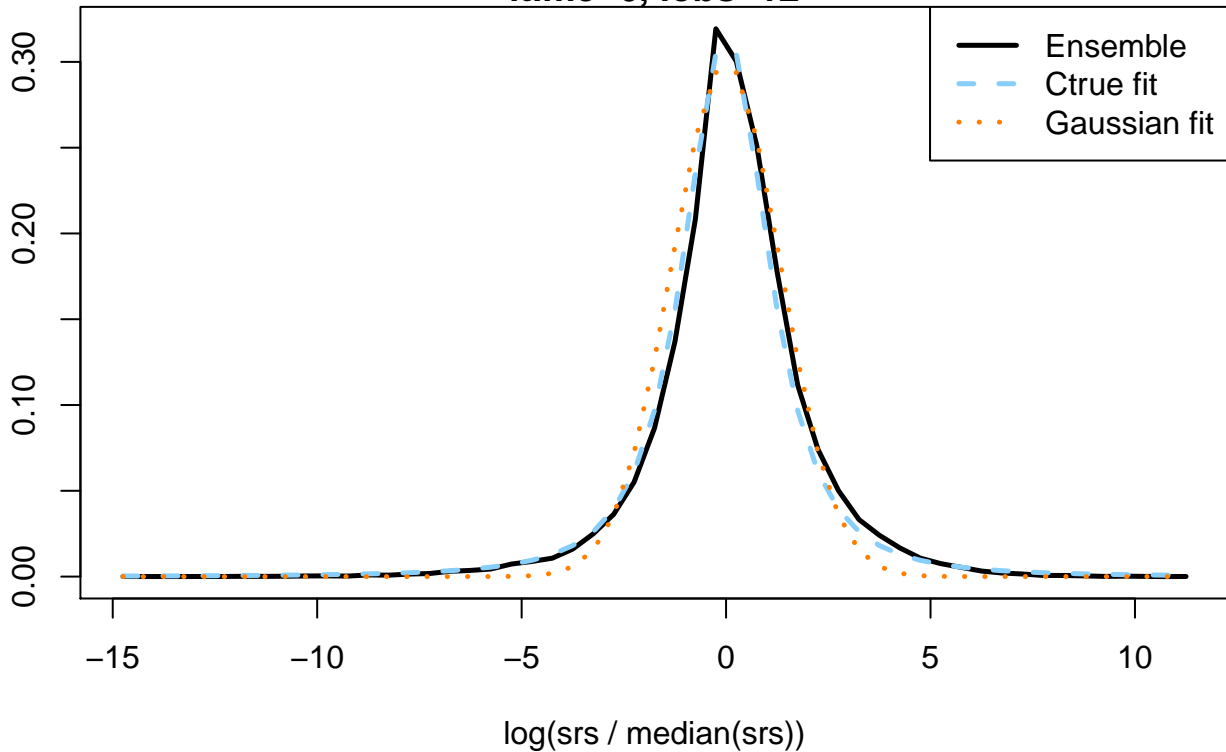

— Ensemble  
- - Ctrue fit  
... Gaussian fit

itime=6, iobs=1

density

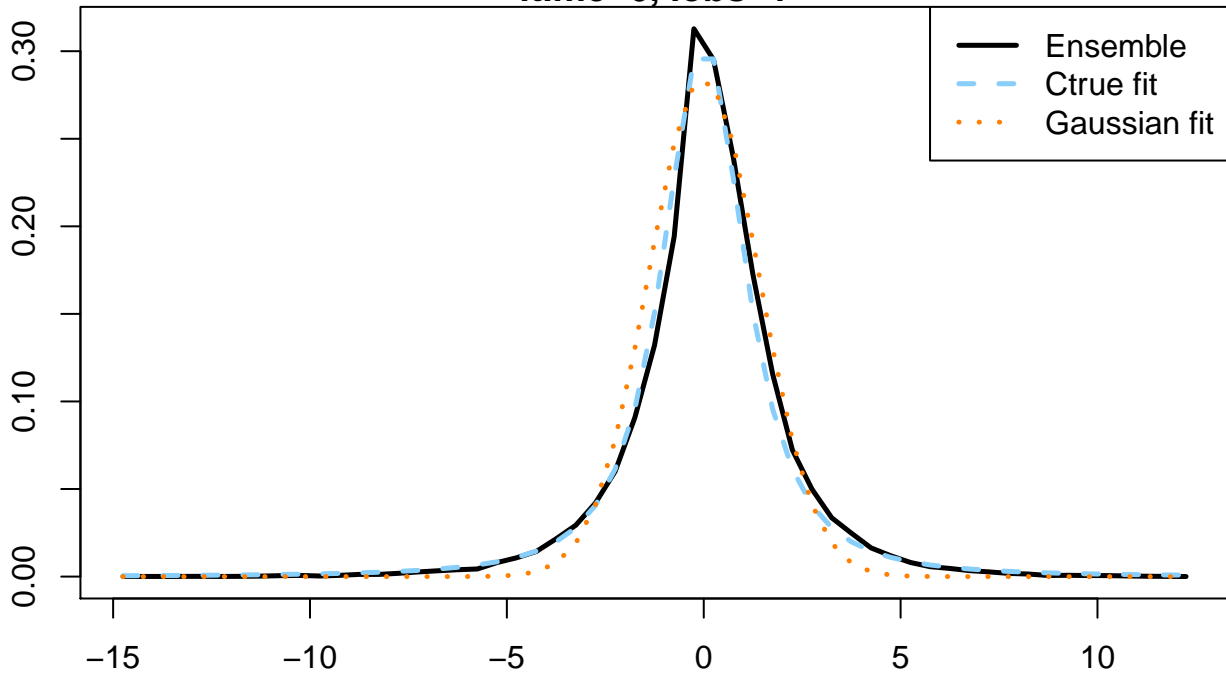

— Ensemble  
- - Ctrue fit  
... Gaussian fit

$\log(\text{srs} / \text{median}(\text{srs}))$

itime=6, iobs=2

density

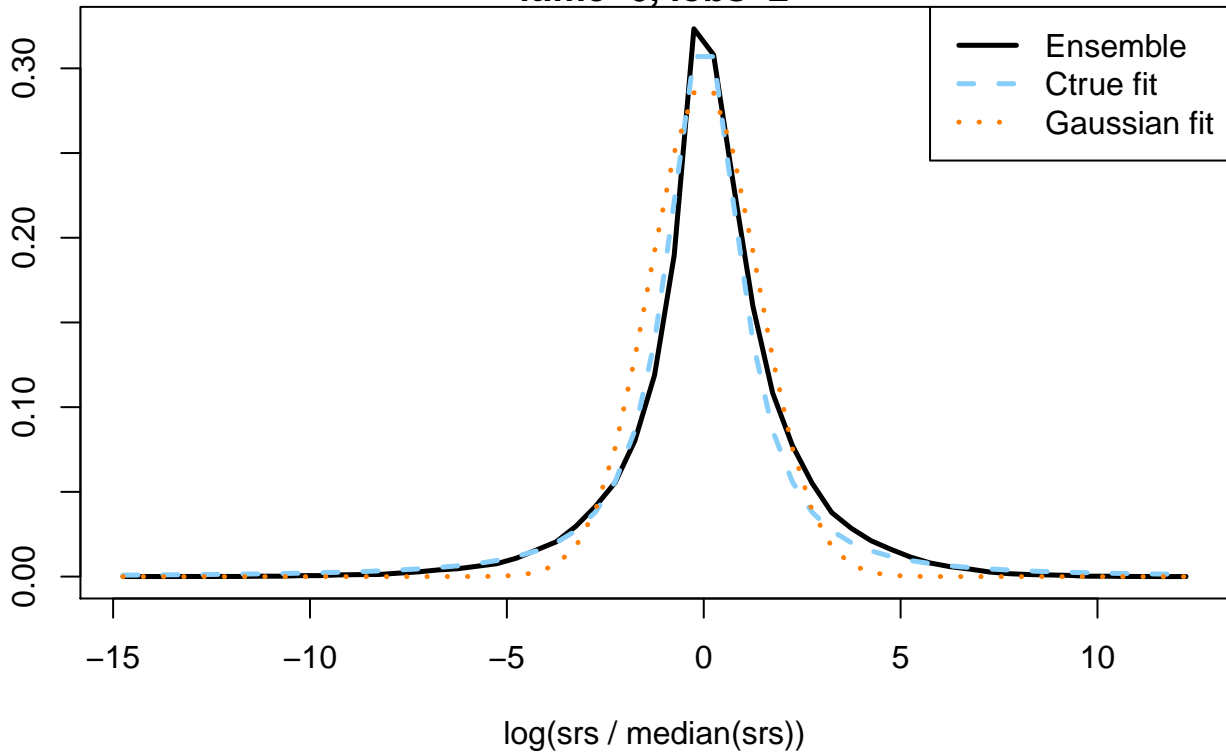

itime=6, iobs=3

density

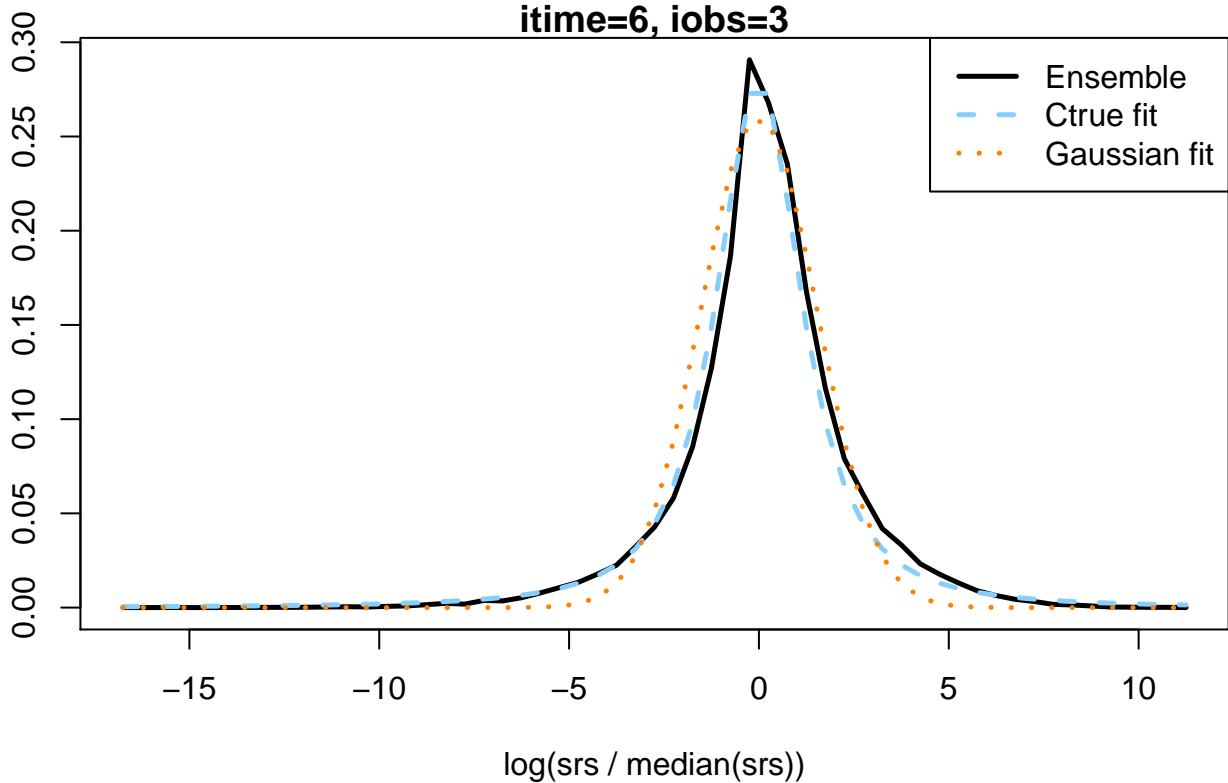

itime=6, iobs=4

density

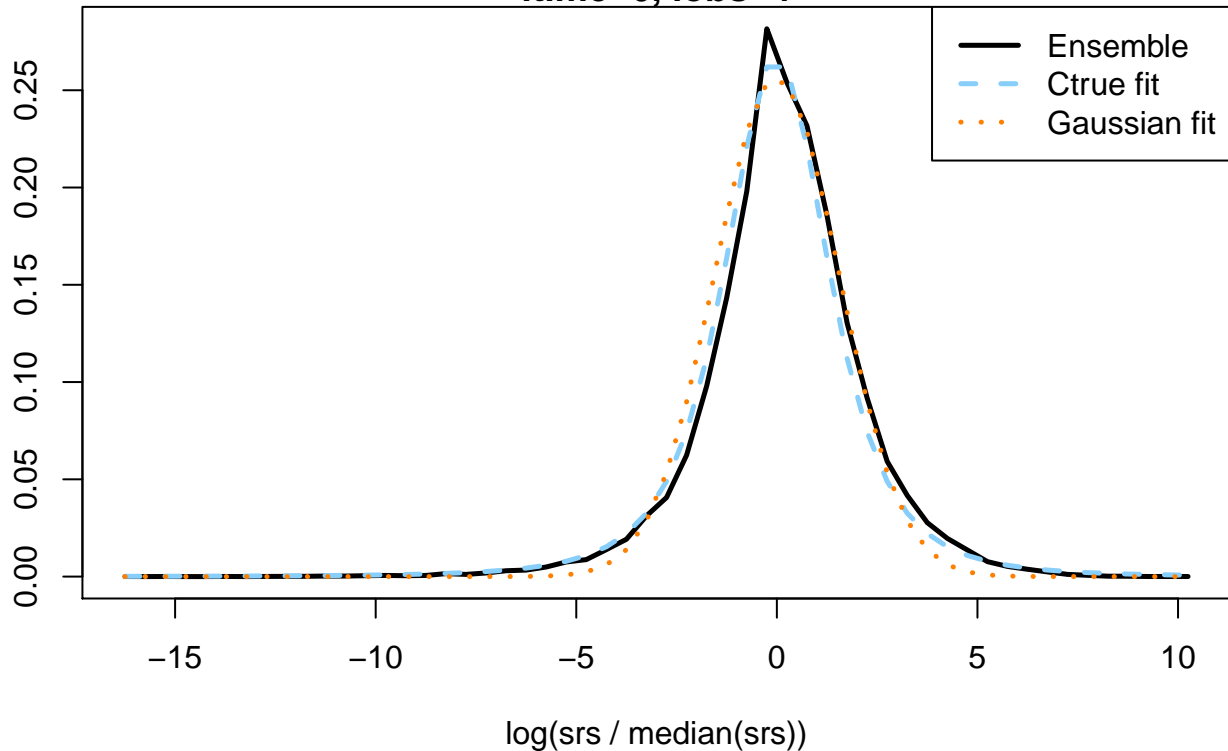

— Ensemble  
- - Ctrue fit  
... Gaussian fit



itime=6, iobs=5

density

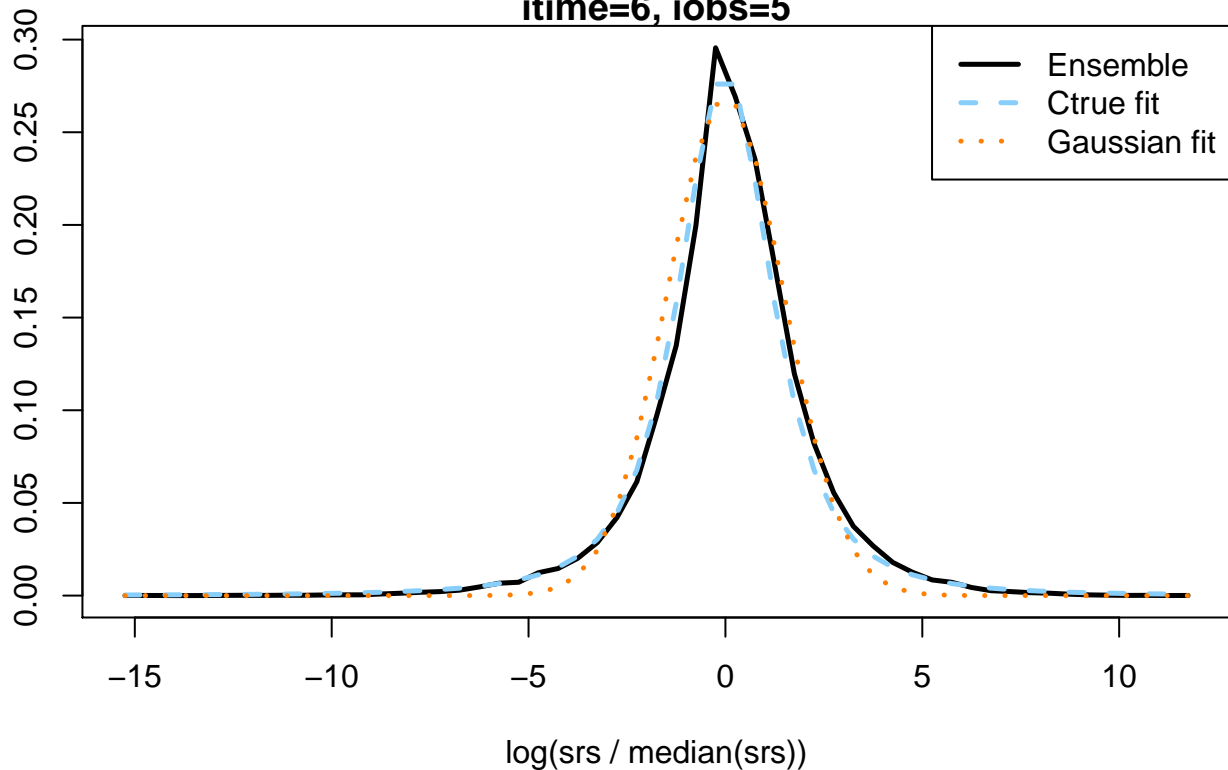

itime=6, iobs=6

density

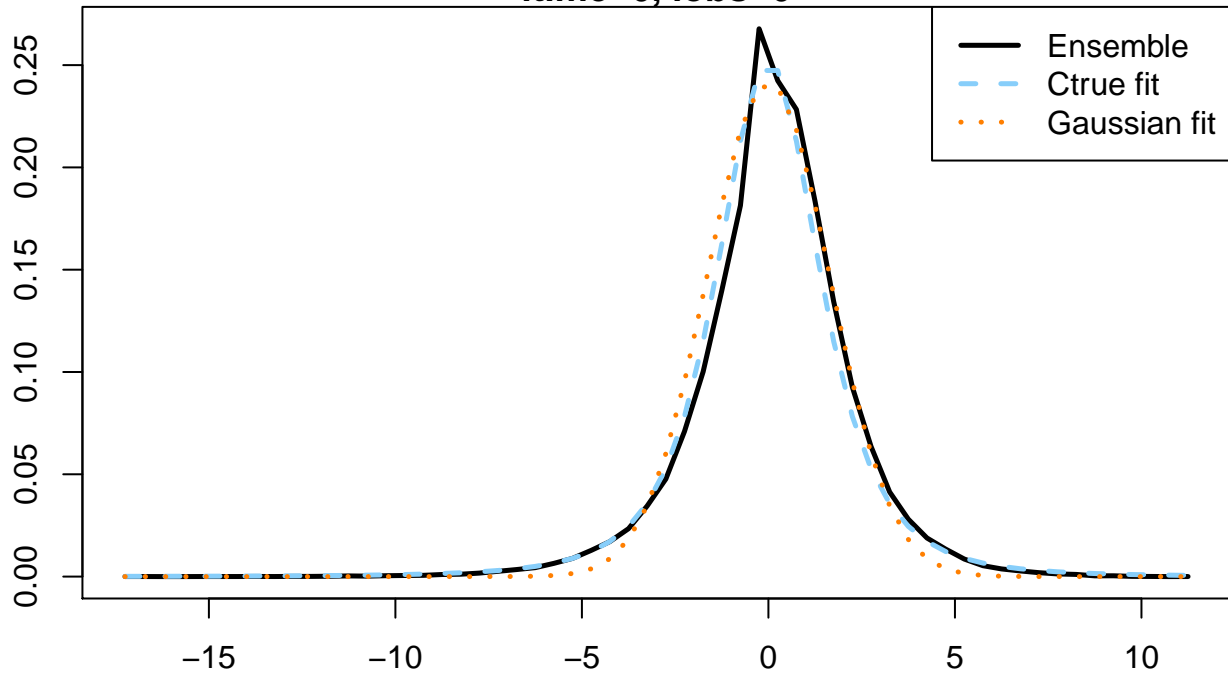

— Ensemble  
- - Ctrue fit  
... Gaussian fit

$\log(\text{srs} / \text{median}(\text{srs}))$

itime=6, iobs=7

density

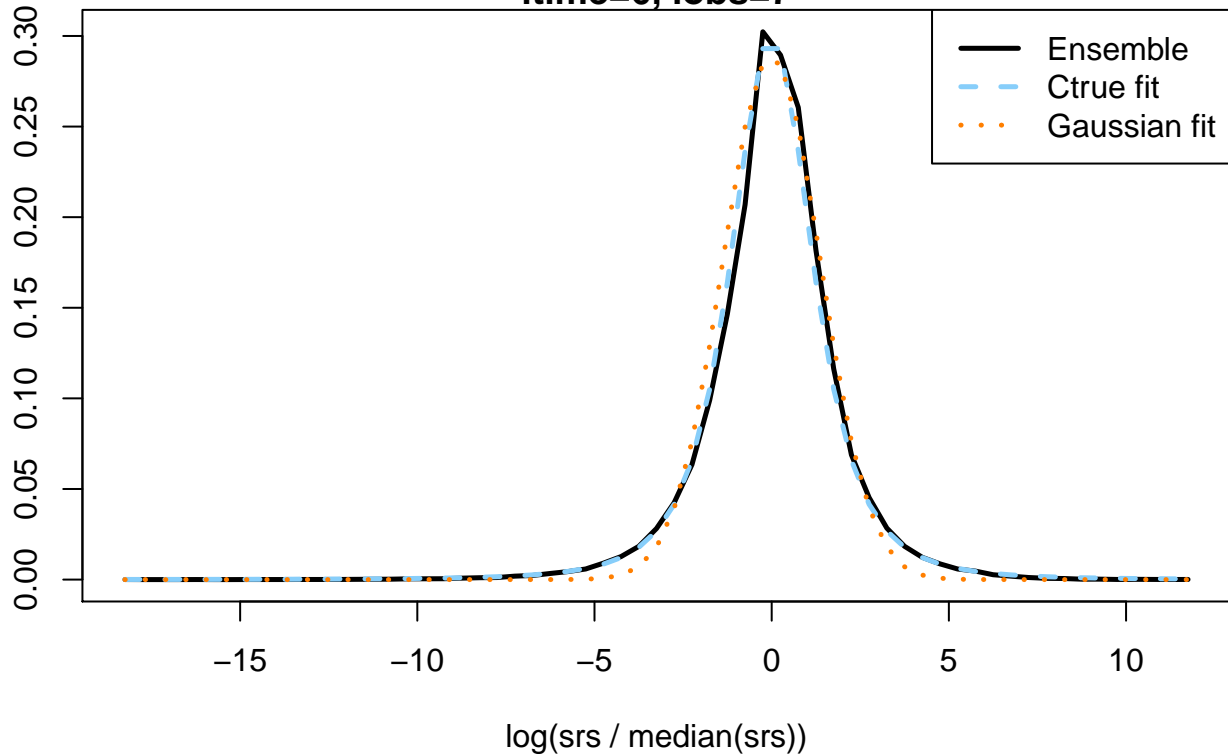

itime=6, iobs=8

density

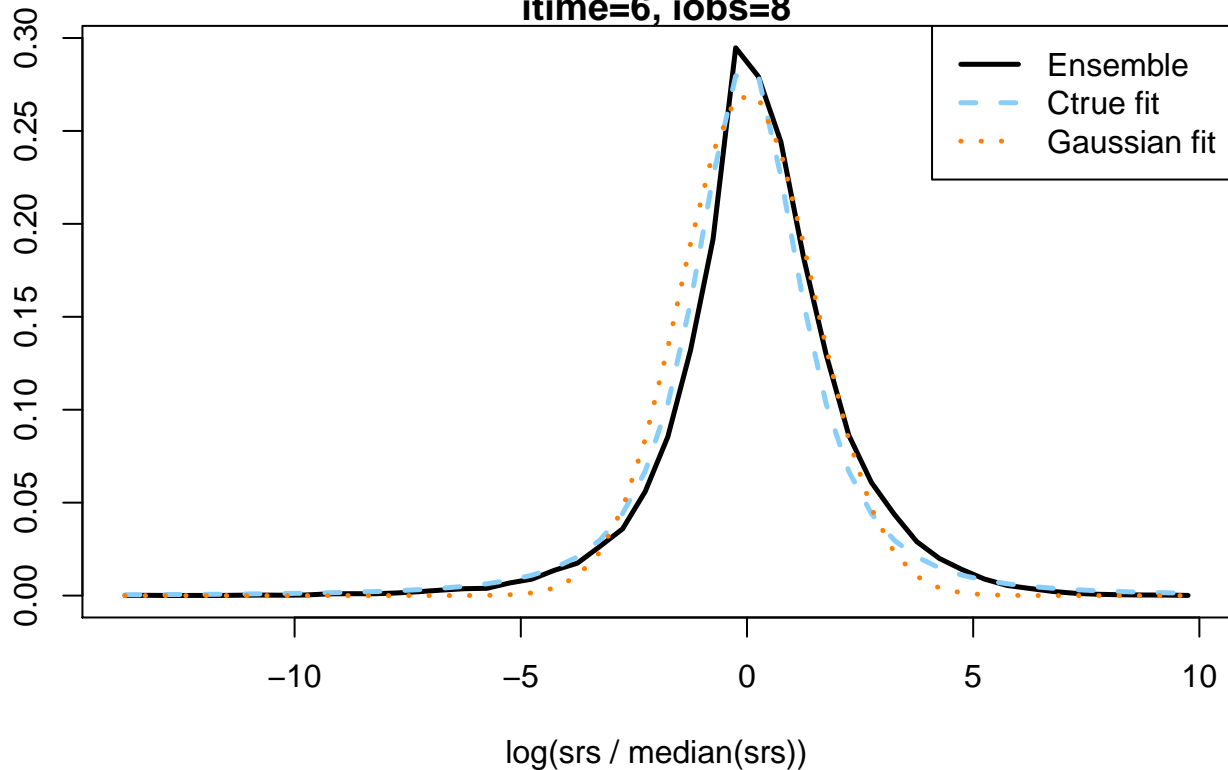

itime=6, iobs=9

density

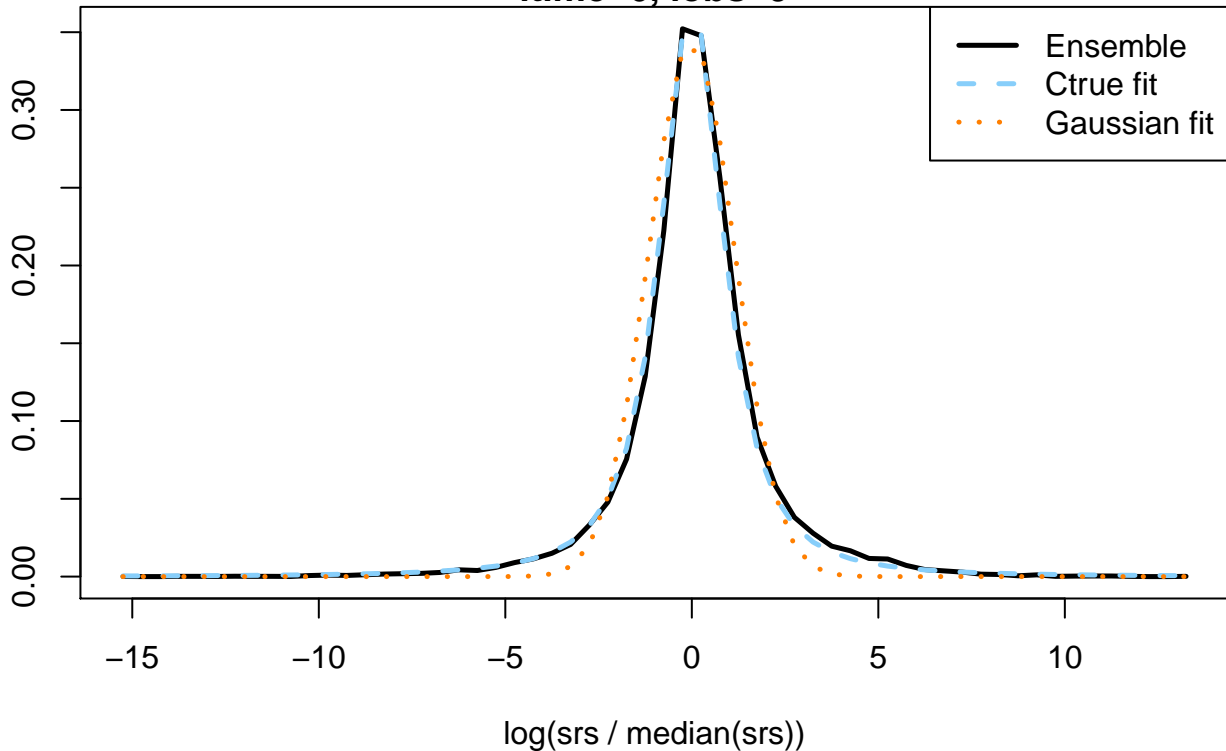

— Ensemble  
- - Ctrue fit  
... Gaussian fit

itime=7, iobs=10

density

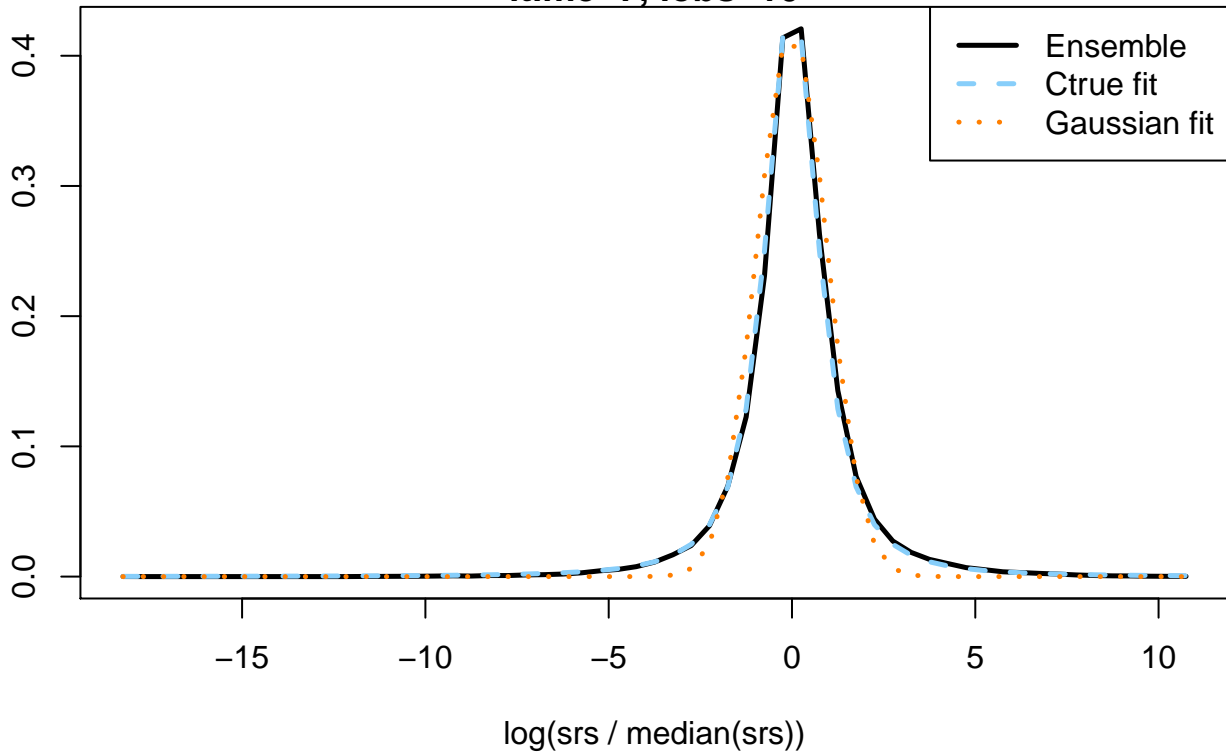

itime=7, iobs=11

density

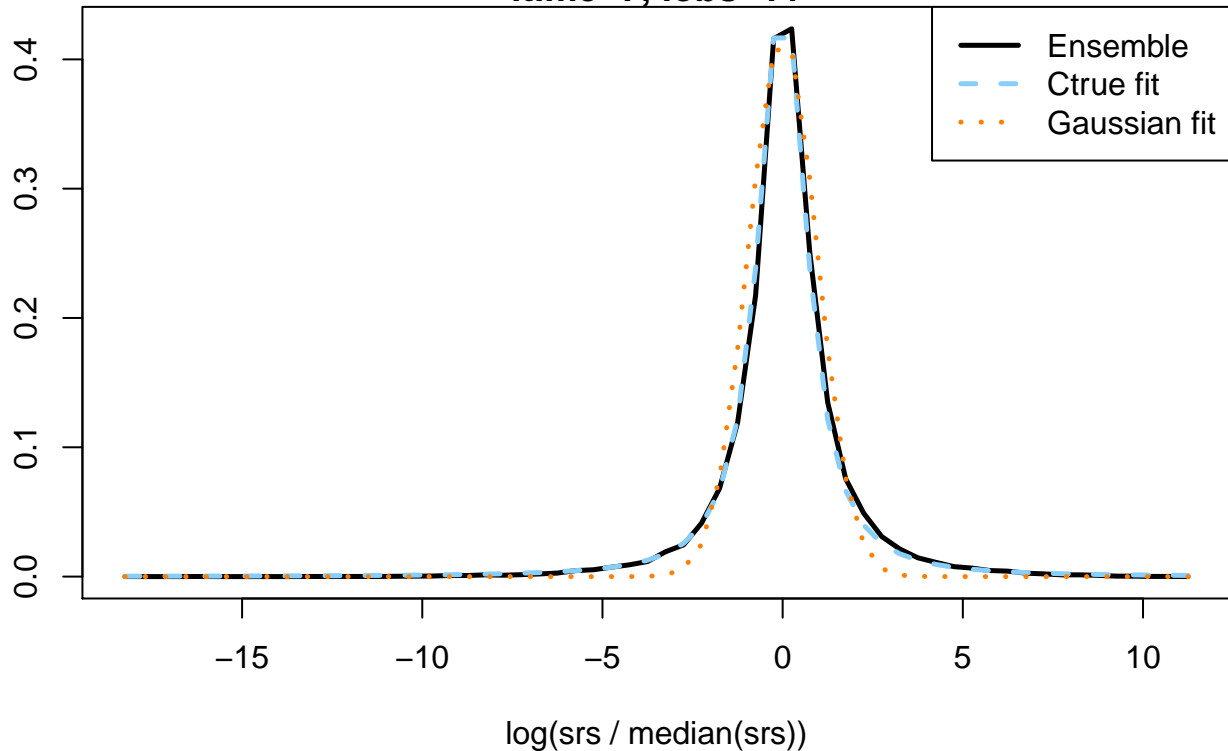

itime=7, iobs=12

density

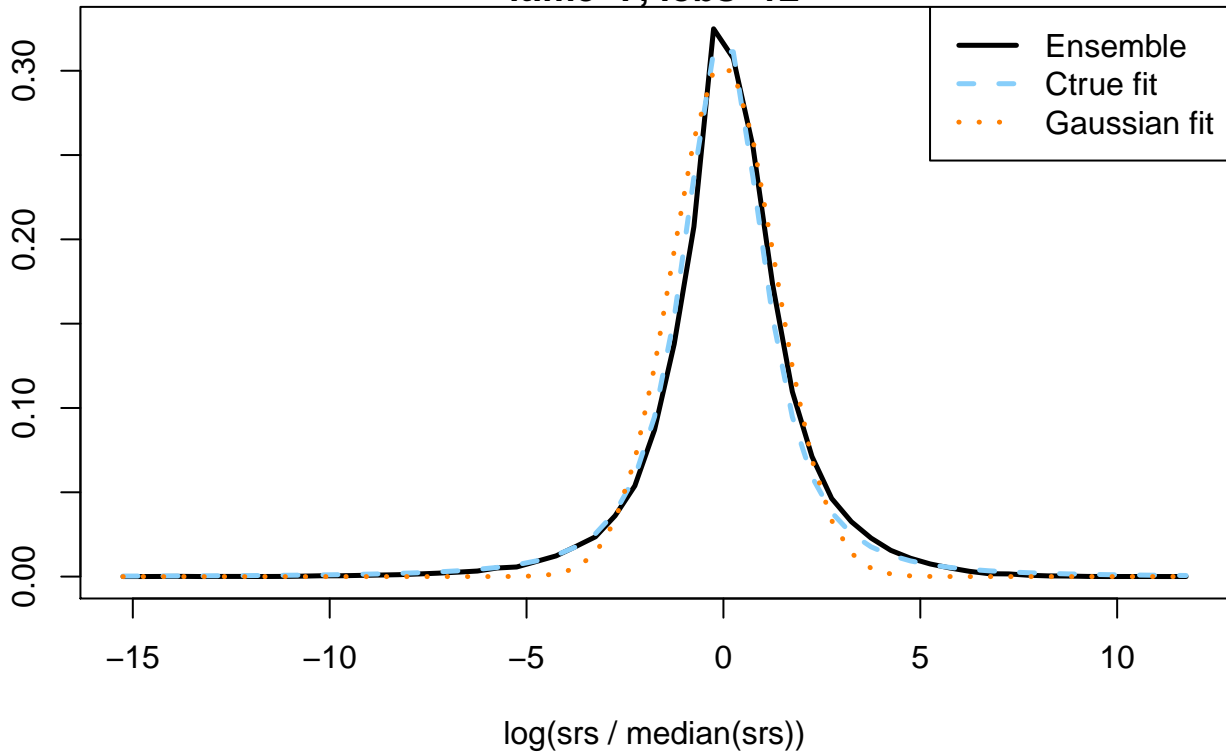



itime=7, iobs=1

density

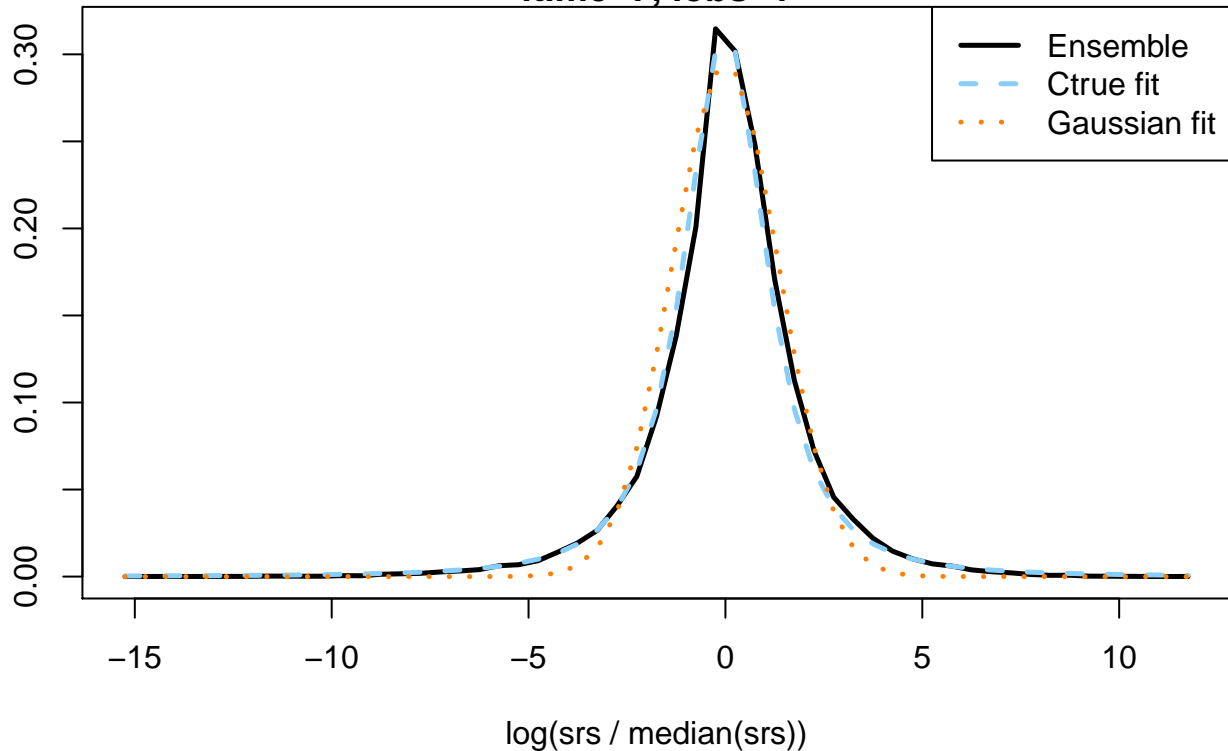

itime=7, iobs=2

density

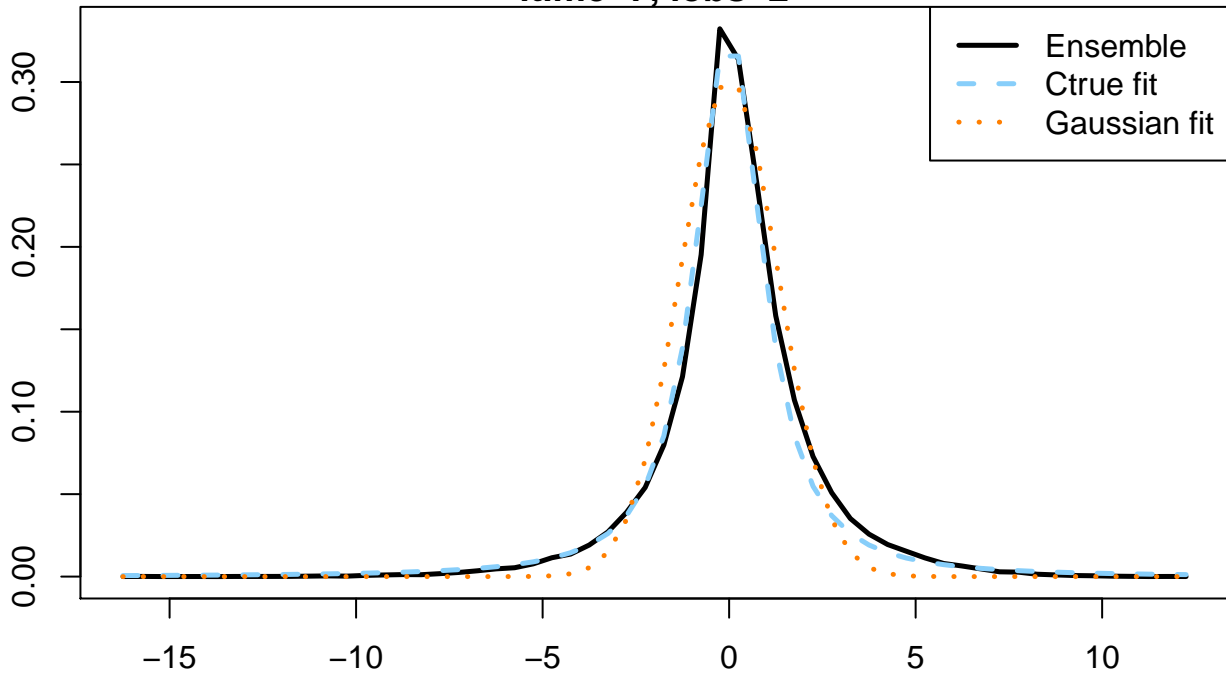

- Ensemble
- - Ctrue fit
- ... Gaussian fit

$\log(\text{srs} / \text{median}(\text{srs}))$

itime=7, iobs=3

density

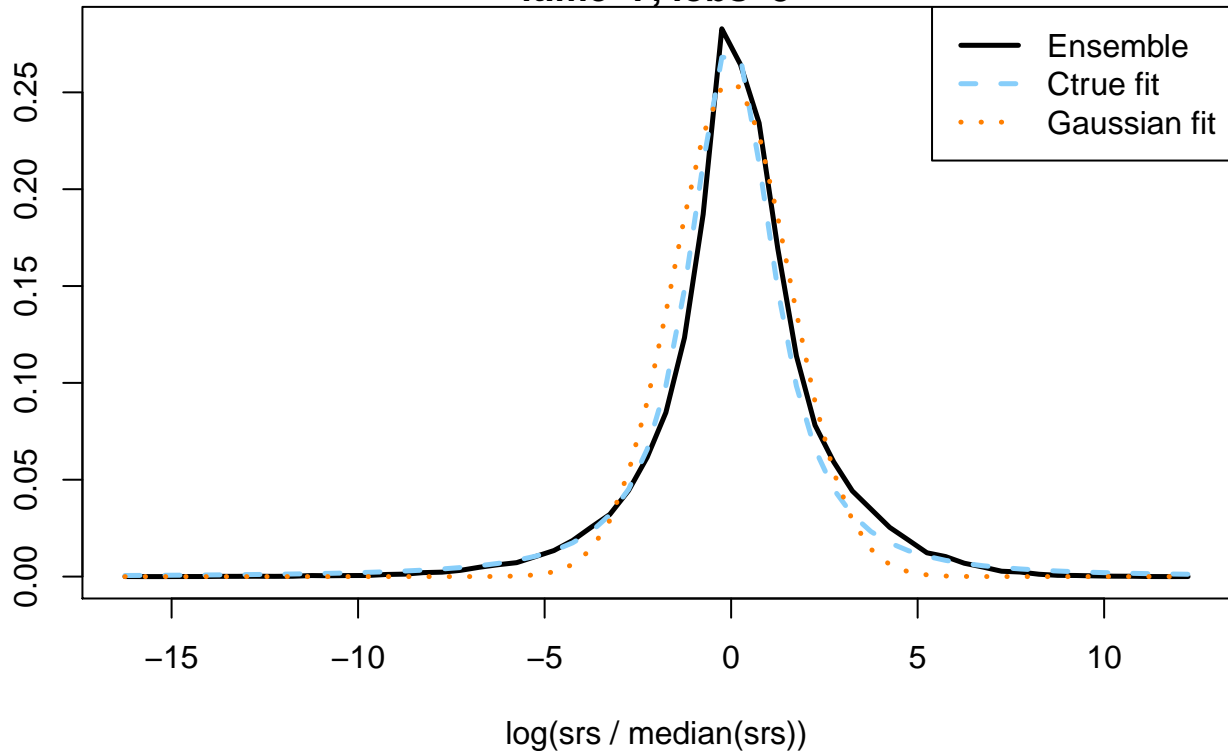

itime=7, iobs=4

density

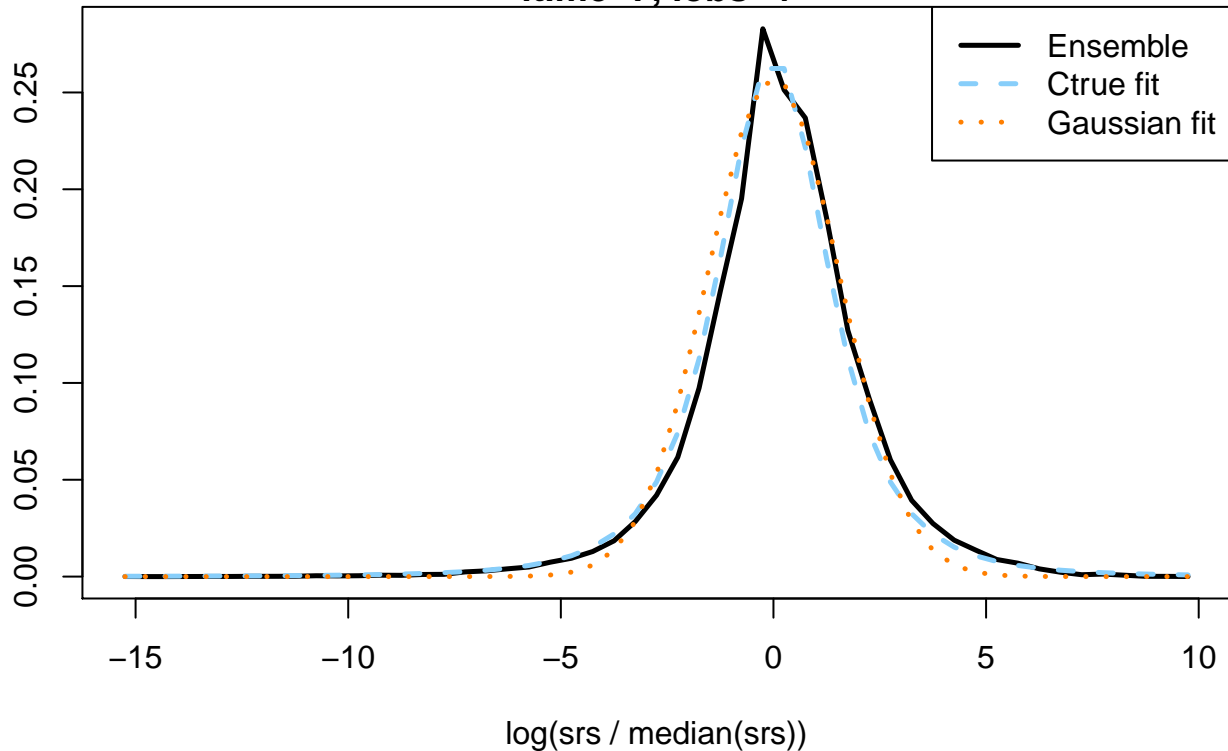

itime=7, iobs=5

density

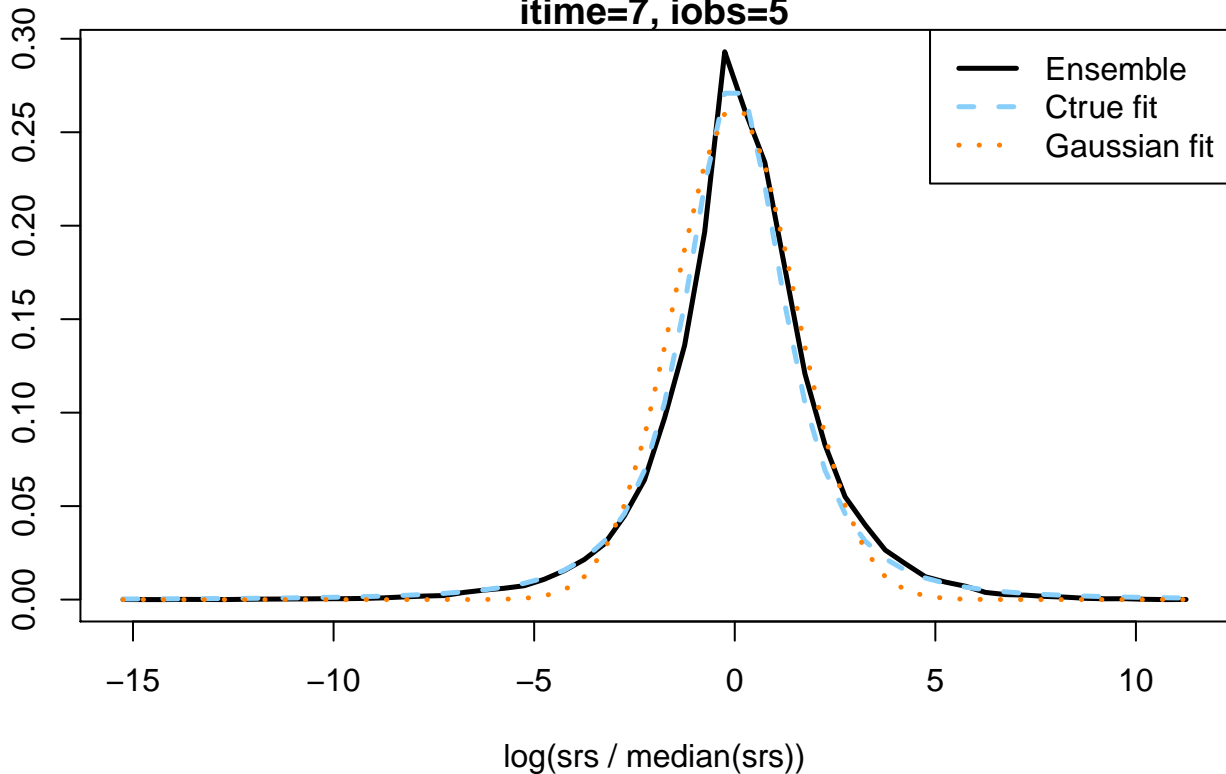

itime=7, iobs=6

density

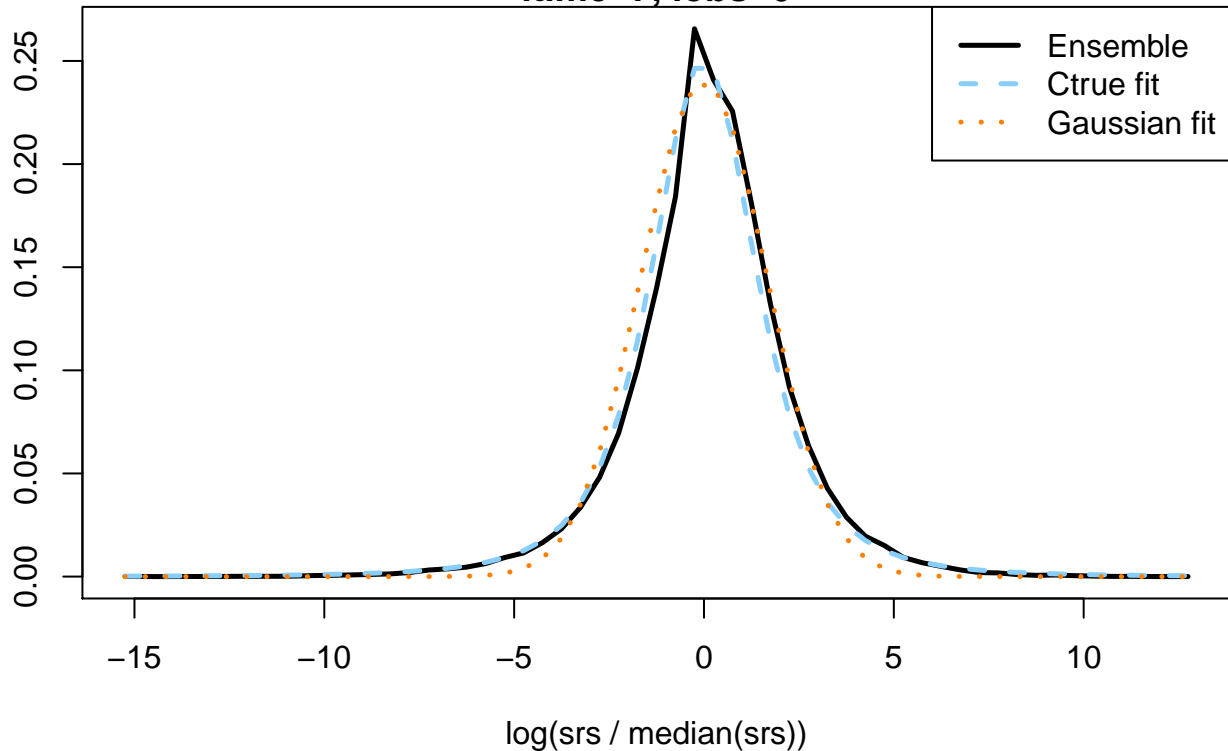

itime=7, iobs=7

density

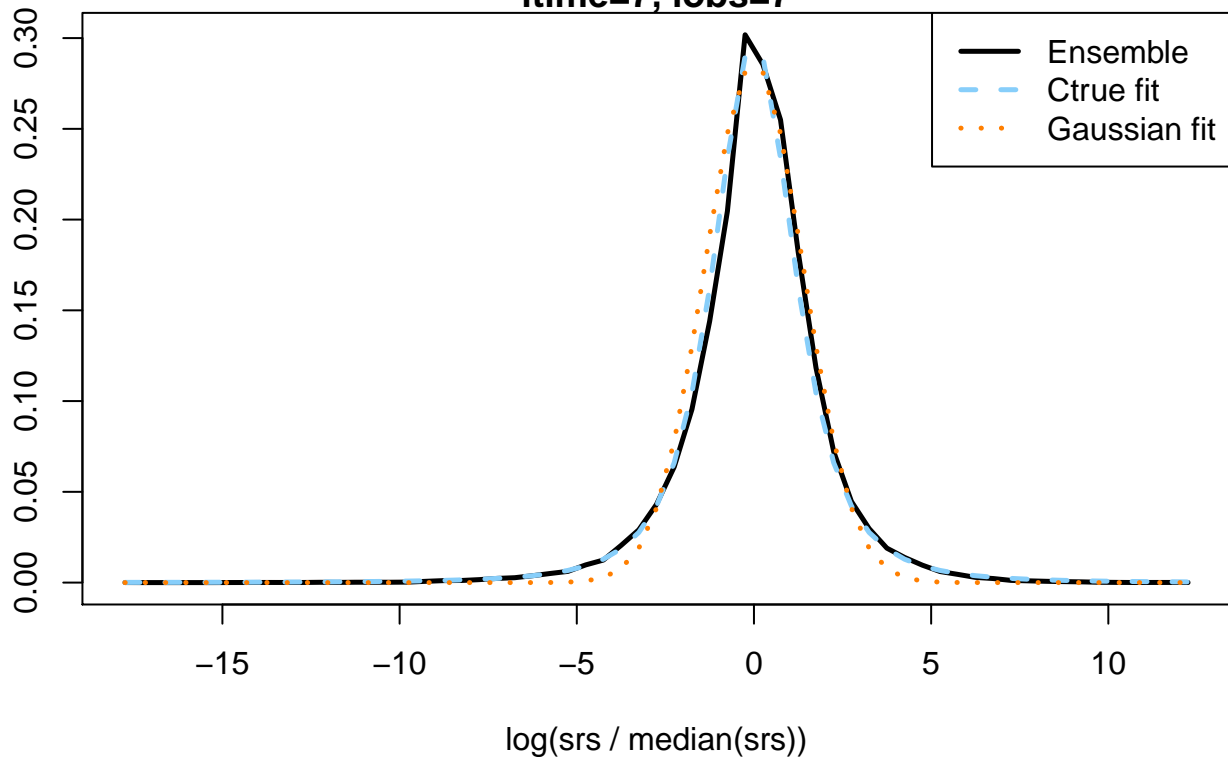

itime=7, iobs=8

density

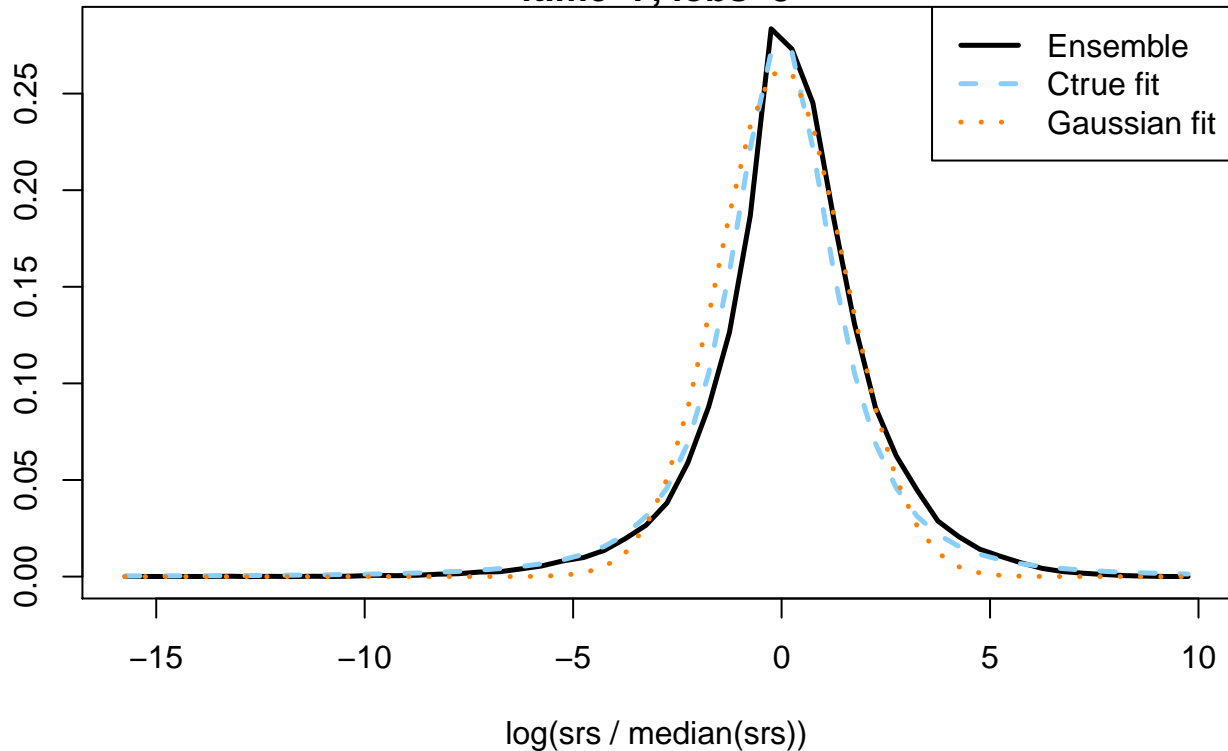



itime=7, iobs=9

density

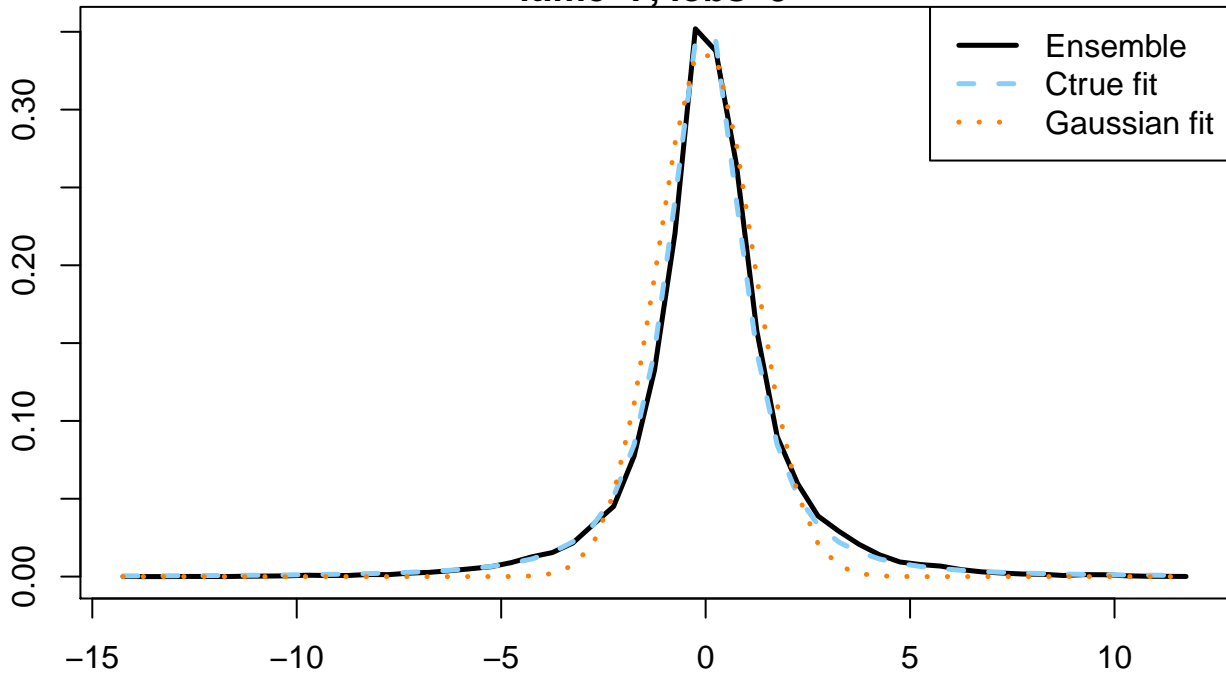

log(srs / median(srs))

itime=8, iobs=10

density

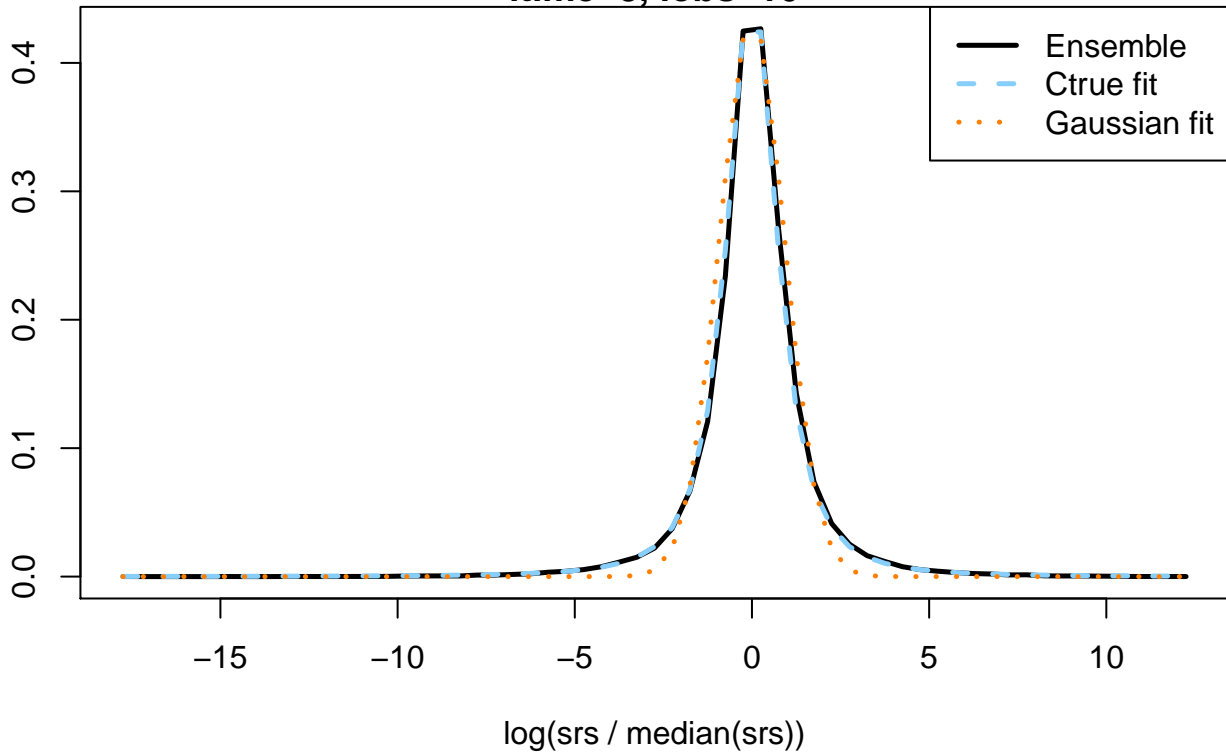

— Ensemble  
- - Ctrue fit  
... Gaussian fit

itime=8, iobs=11

density

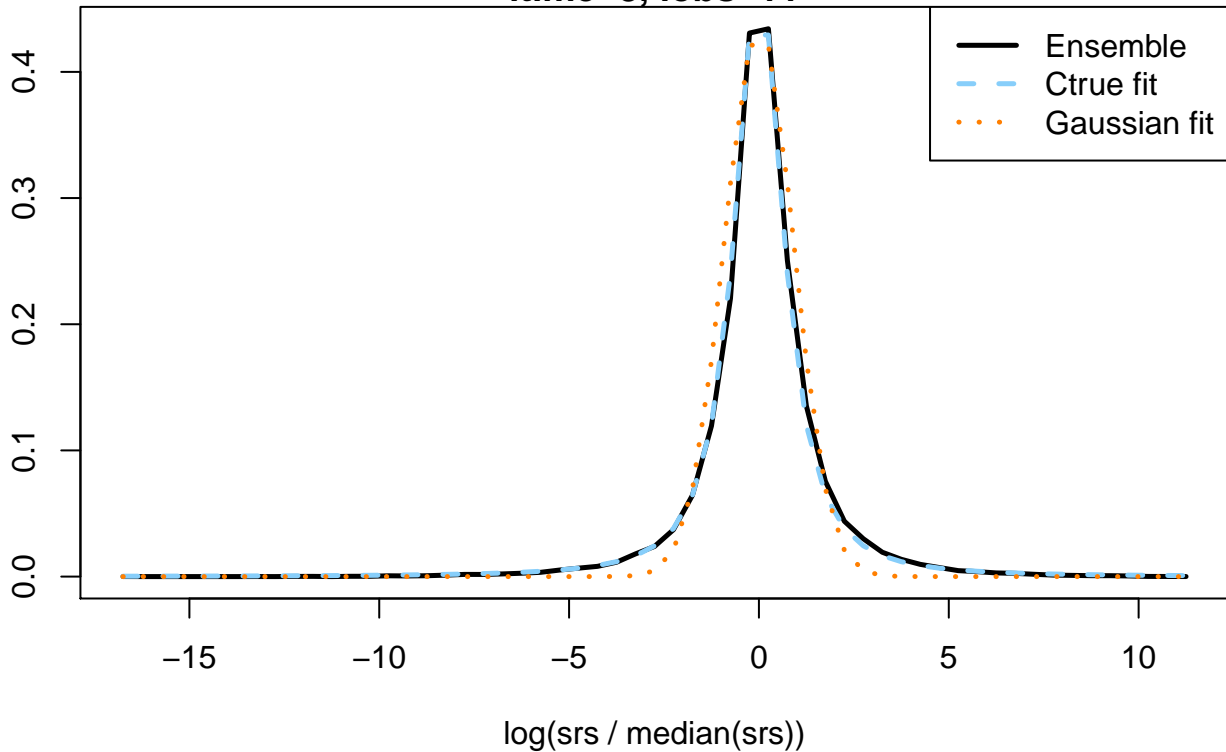

— Ensemble  
- - Ctrue fit  
... Gaussian fit

itime=8, iobs=12

density

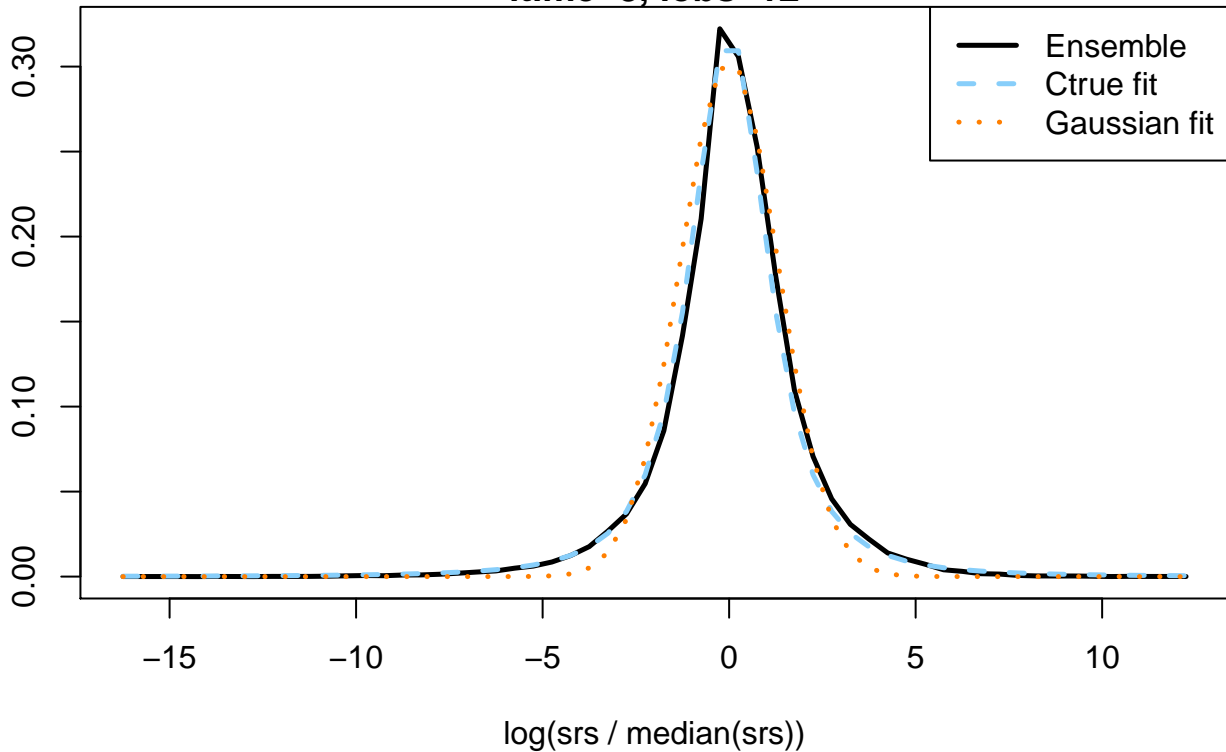

itime=8, iobs=1

density

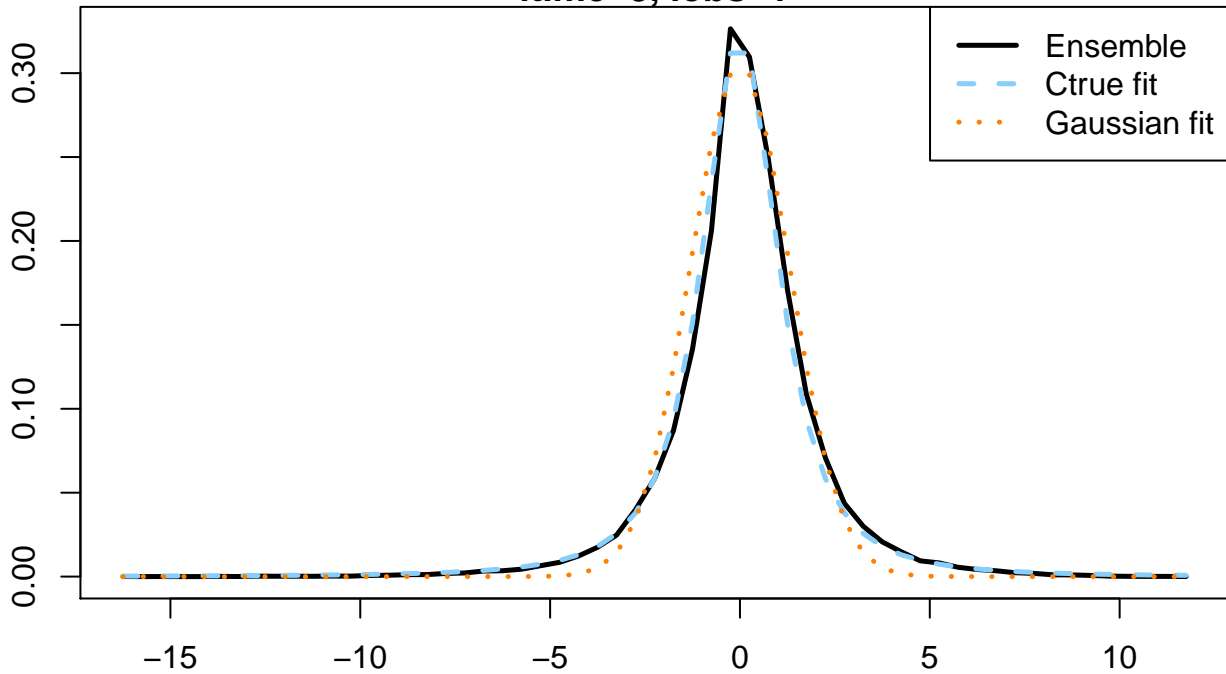

— Ensemble  
- - Ctrue fit  
... Gaussian fit

$\log(\text{srs} / \text{median}(\text{srs}))$

itime=8, iobs=2

density

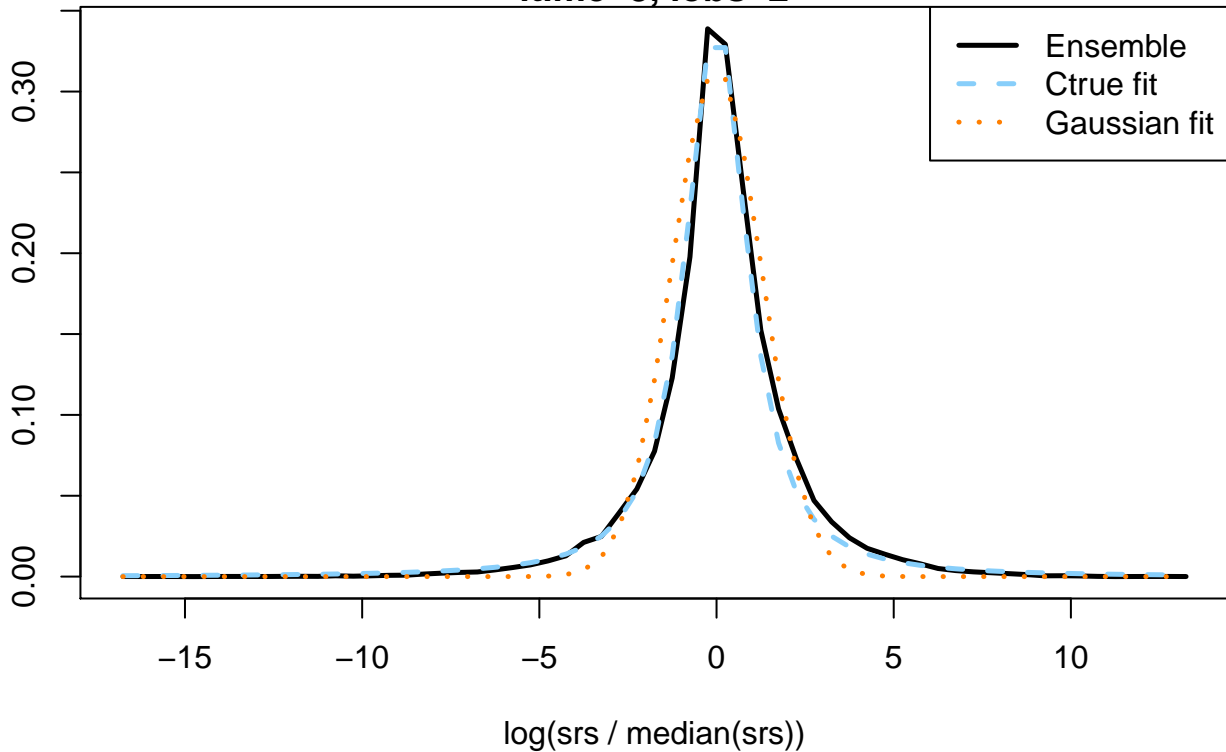

itime=8, iobs=3

density

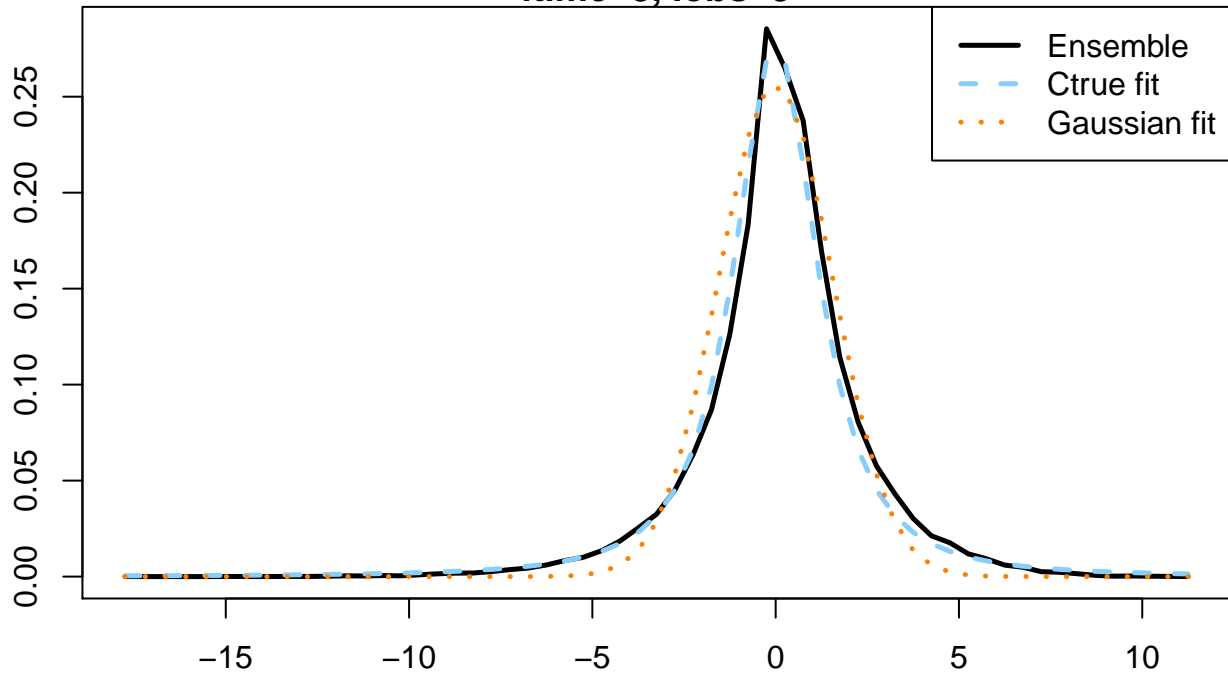

log(srs / median(srs))

itime=8, iobs=4

density

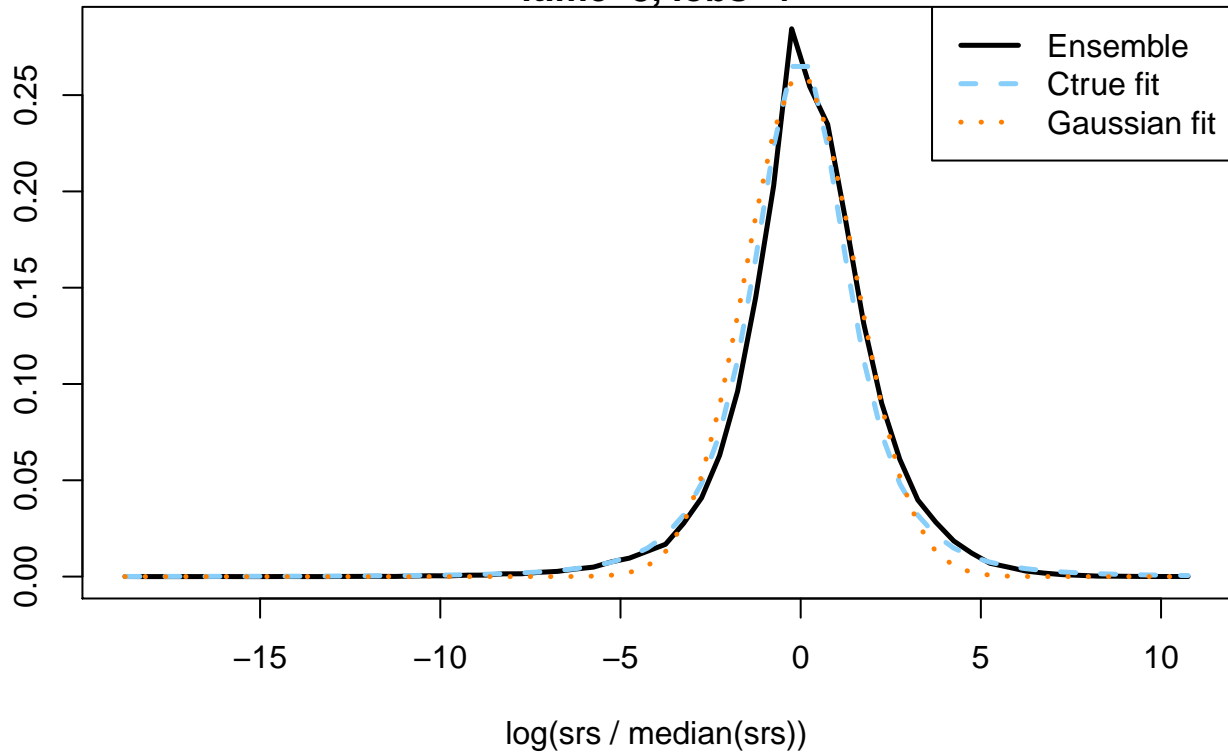

— Ensemble  
- - Ctrue fit  
... Gaussian fit



itime=8, iobs=5

density

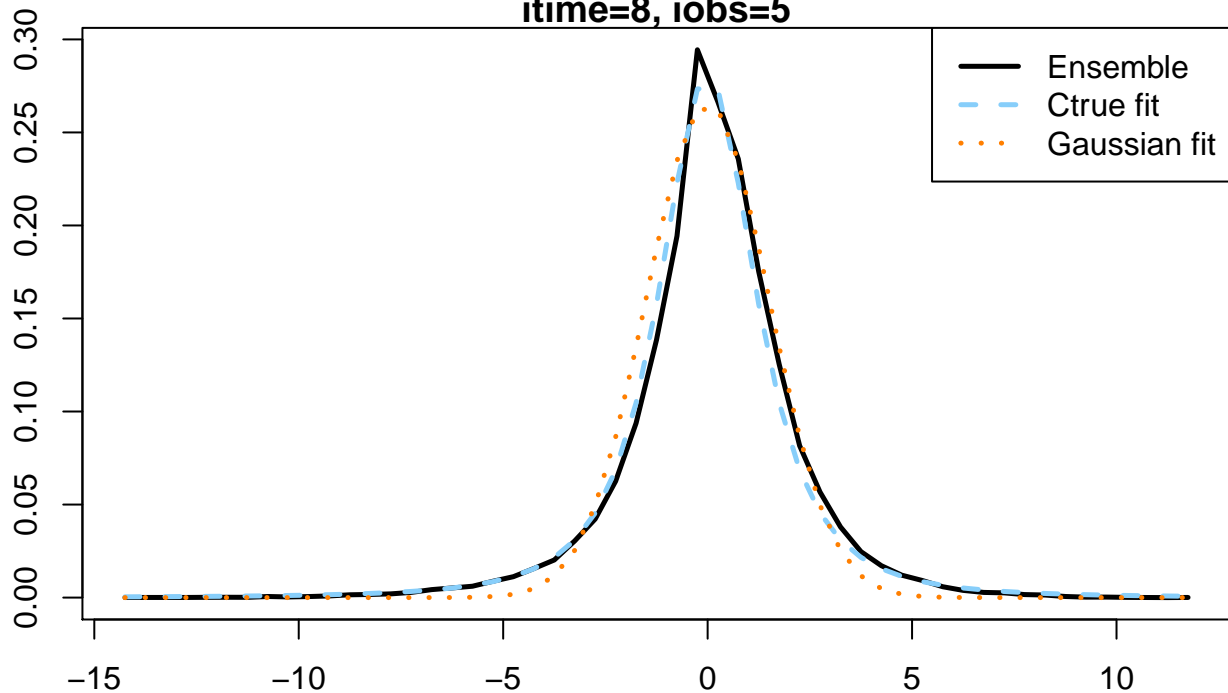

log(srs / median(srs))

itime=8, iobs=6

density

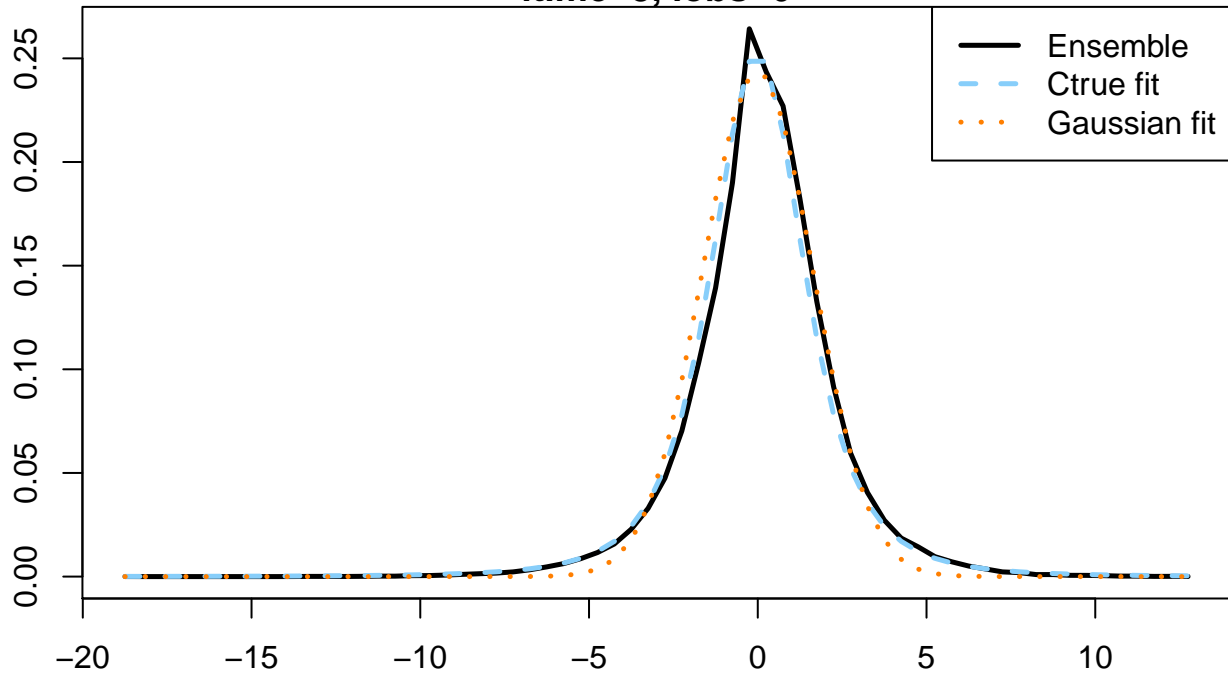

— Ensemble  
- - Ctrue fit  
... Gaussian fit

$\log(\text{srs} / \text{median}(\text{srs}))$

itime=8, iobs=7

density

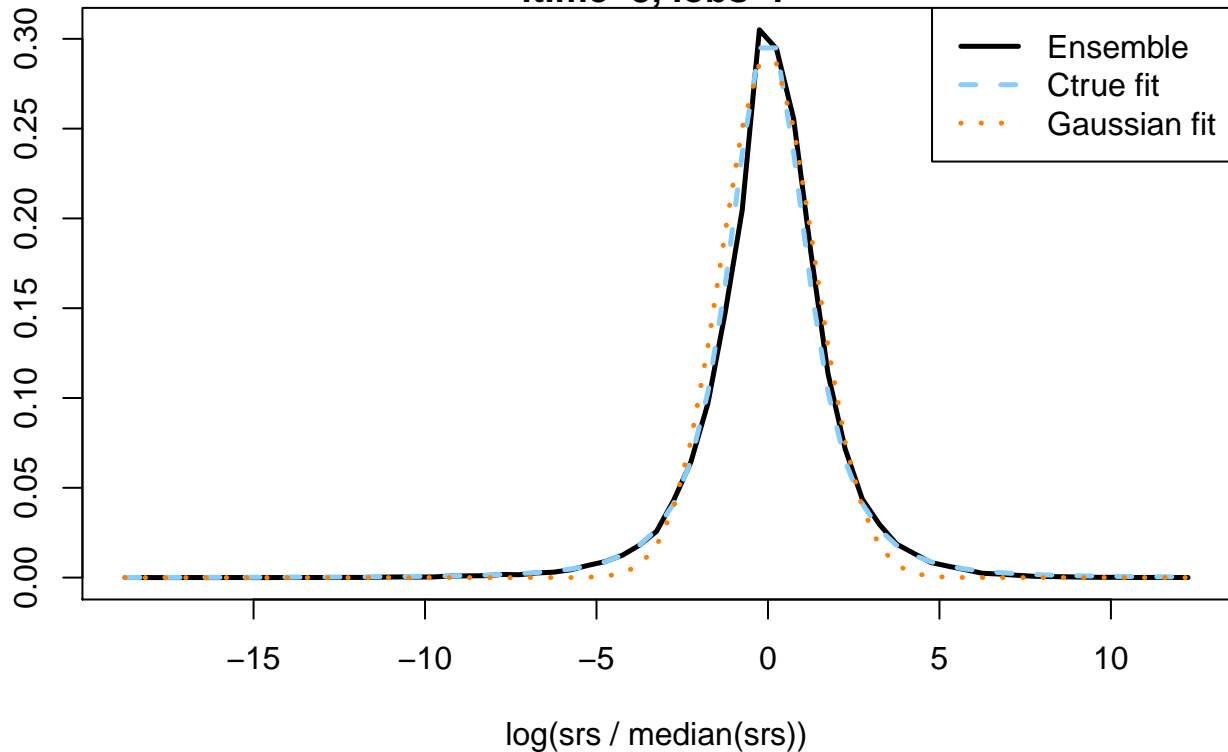

itime=8, iobs=8

density

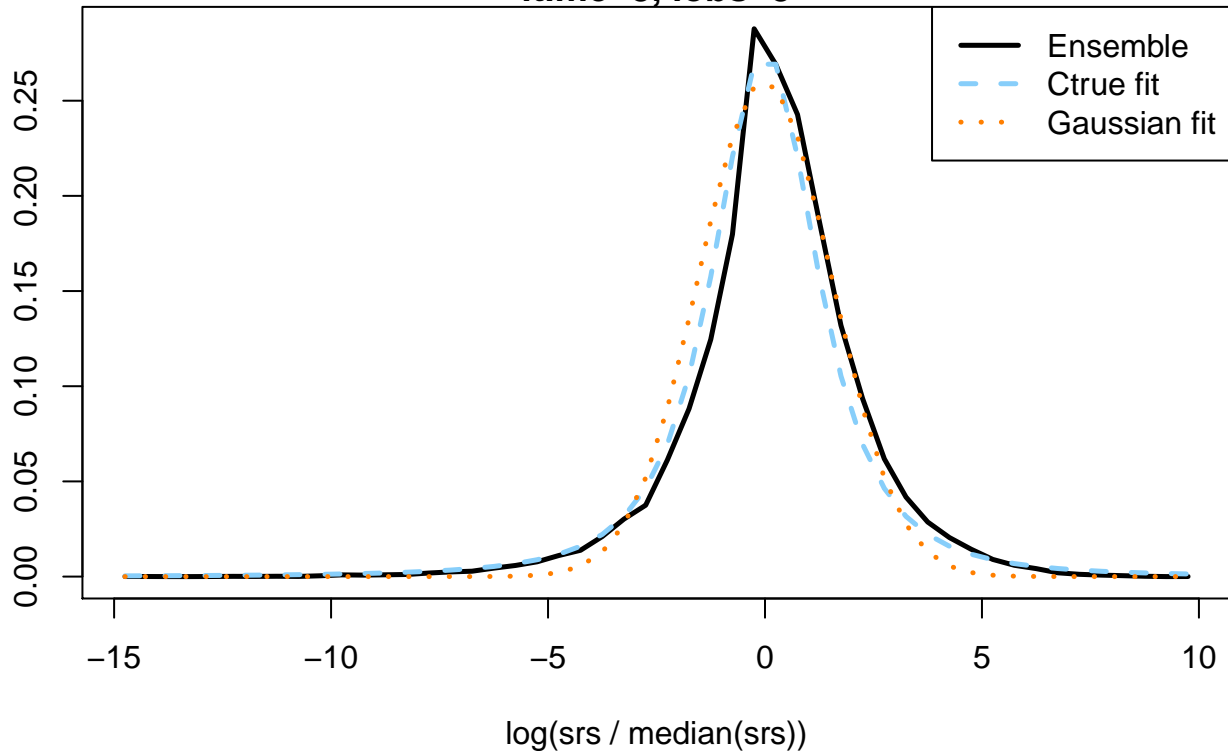

— Ensemble  
- - Ctrue fit  
... Gaussian fit

itime=8, iobs=9

density

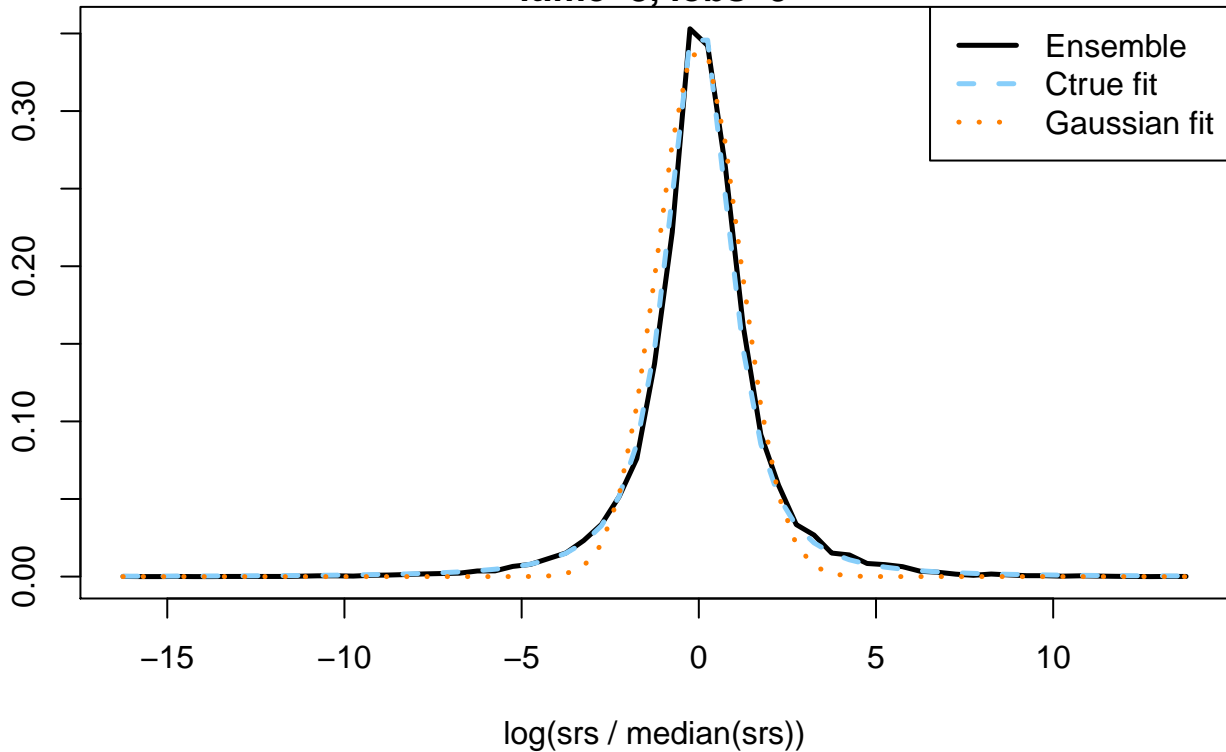

— Ensemble  
- - Ctrue fit  
... Gaussian fit

itime=9, iobs=10

density

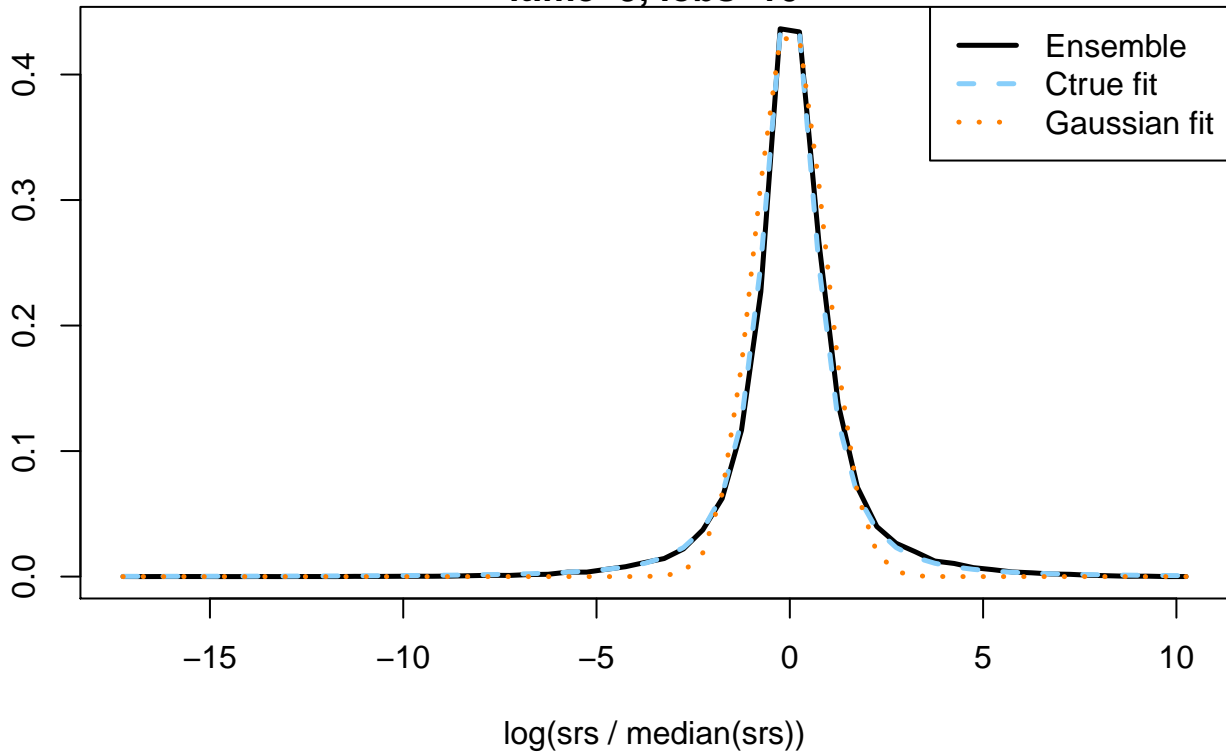

— Ensemble  
- - Ctrue fit  
... Gaussian fit

itime=9, iobs=11

density

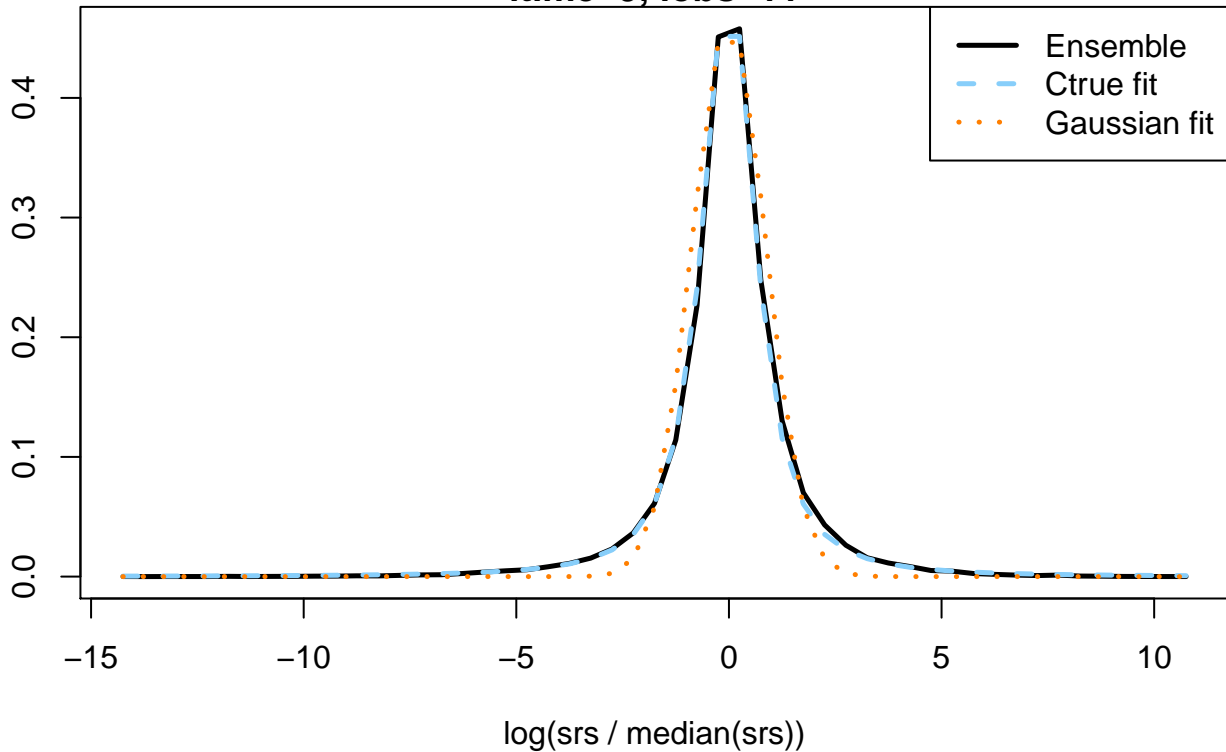

itime=9, iobs=12

density

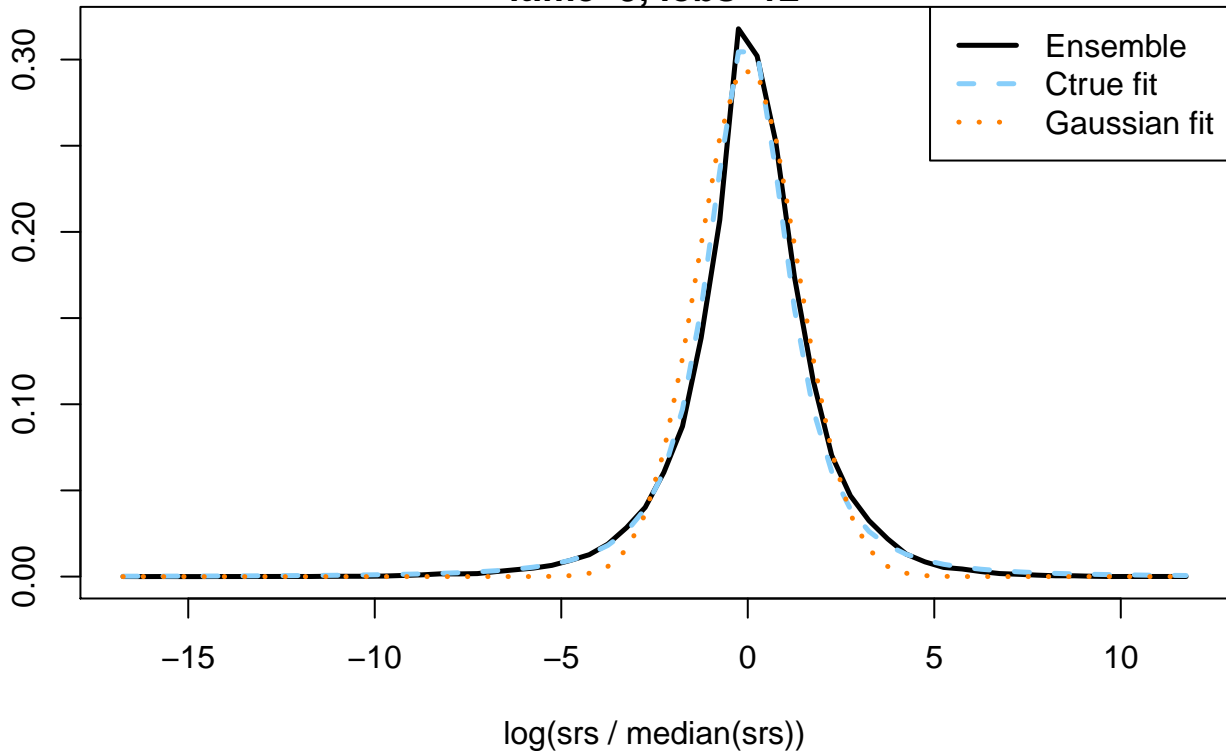



itime=9, iobs=1

density

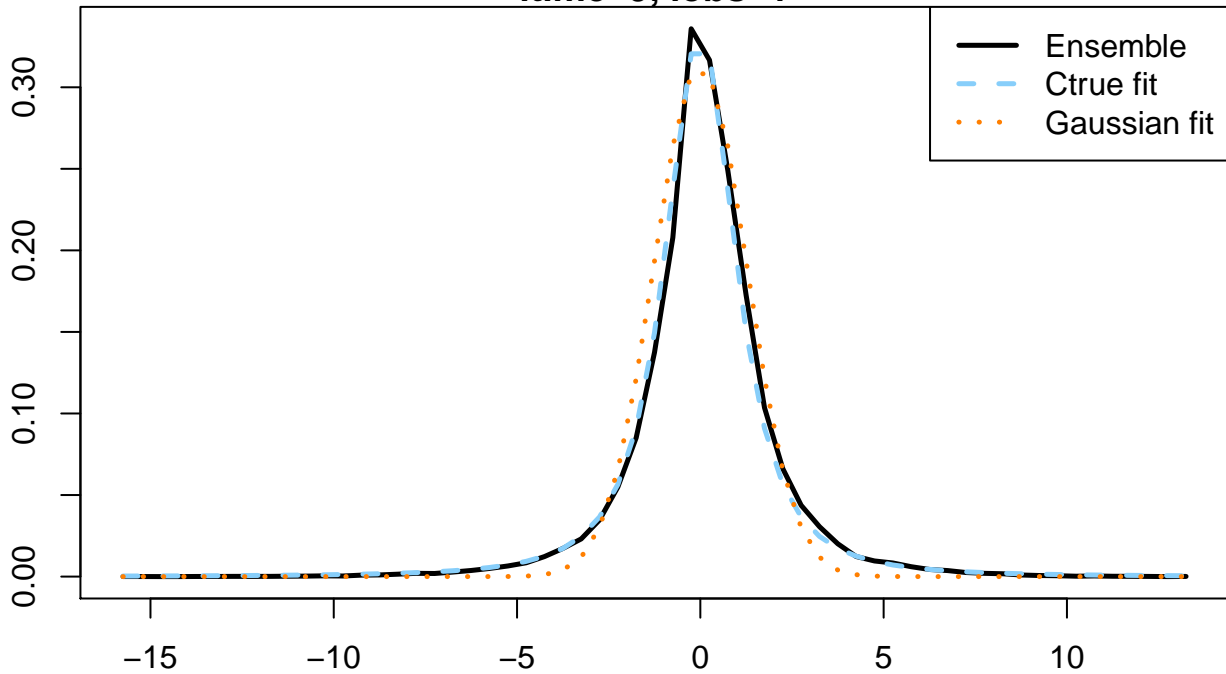

— Ensemble  
- - Ctrue fit  
... Gaussian fit

$\log(\text{srs} / \text{median}(\text{srs}))$

itime=9, iobs=2

density

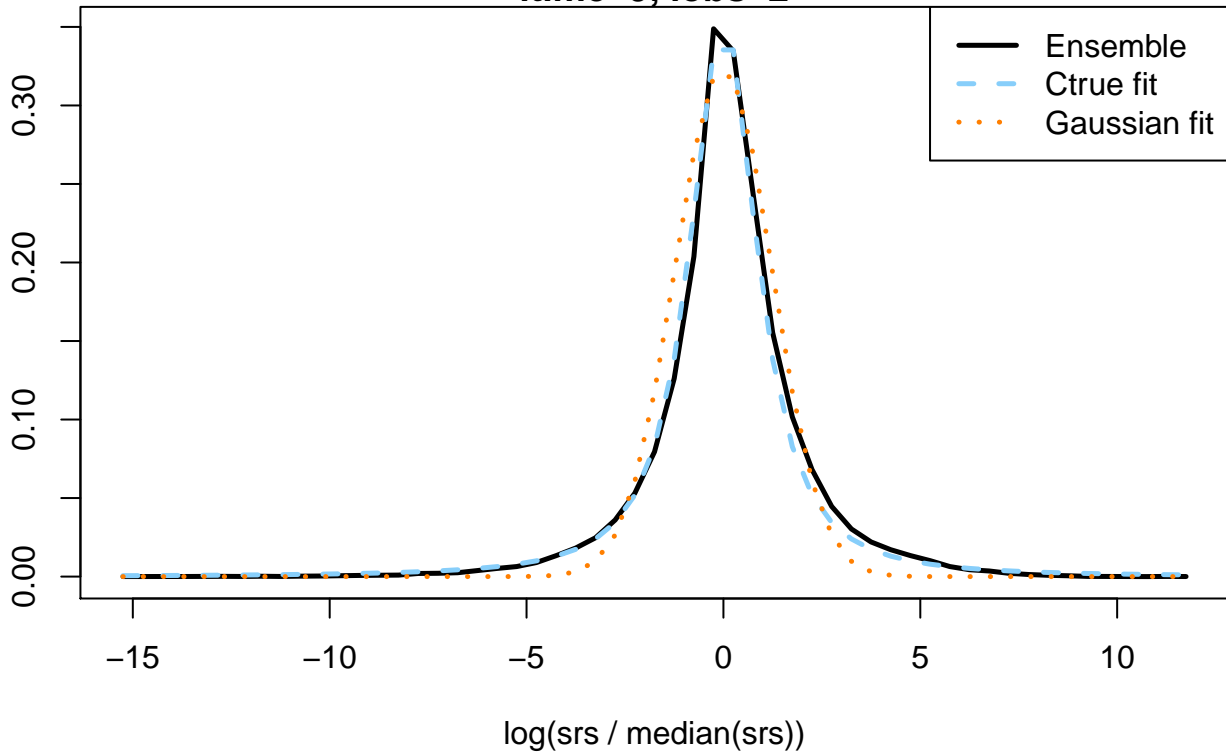

itime=9, iobs=3

density

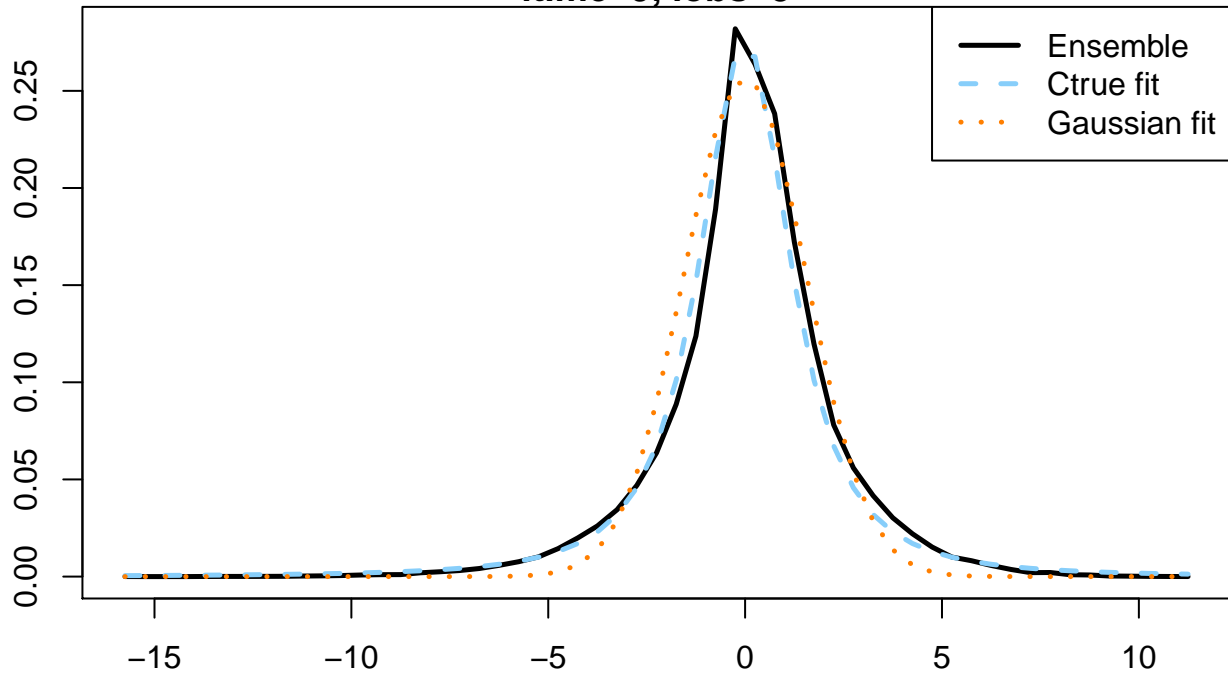

log(srs / median(srs))

itime=9, iobs=4

density

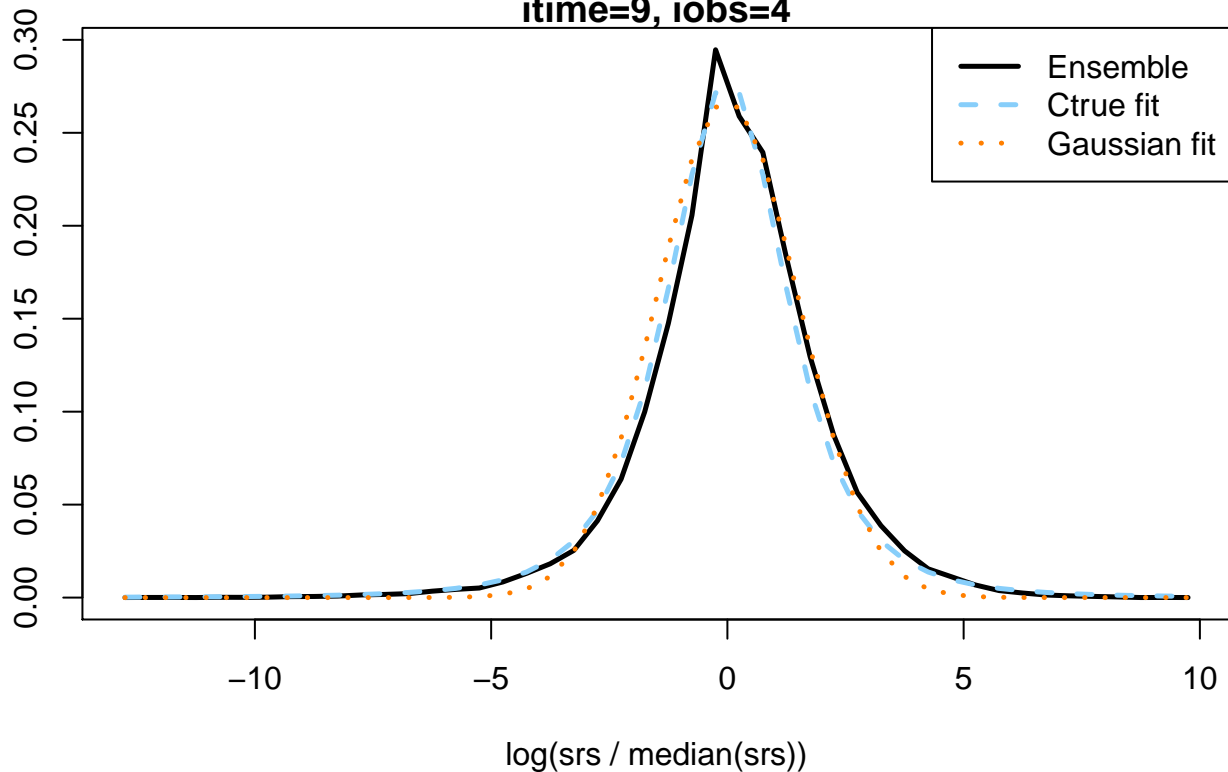

itime=9, iobs=5

density

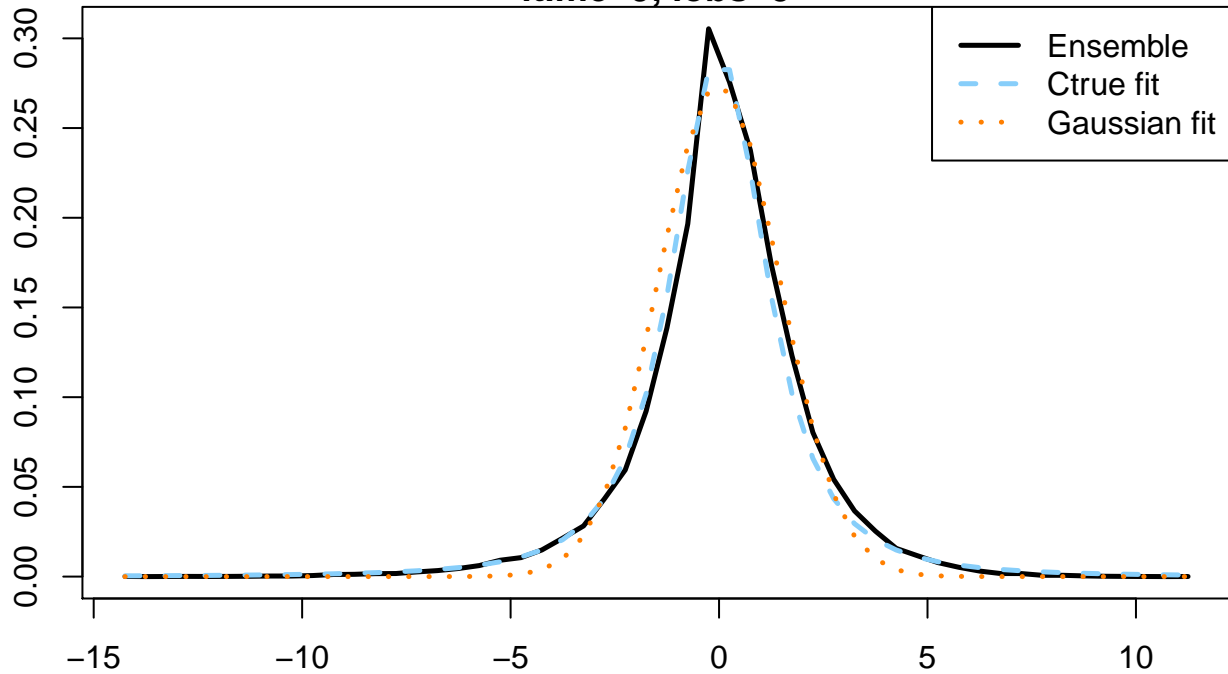

— Ensemble  
- - Ctrue fit  
... Gaussian fit

$\log(\text{srs} / \text{median}(\text{srs}))$

itime=9, iobs=6

density

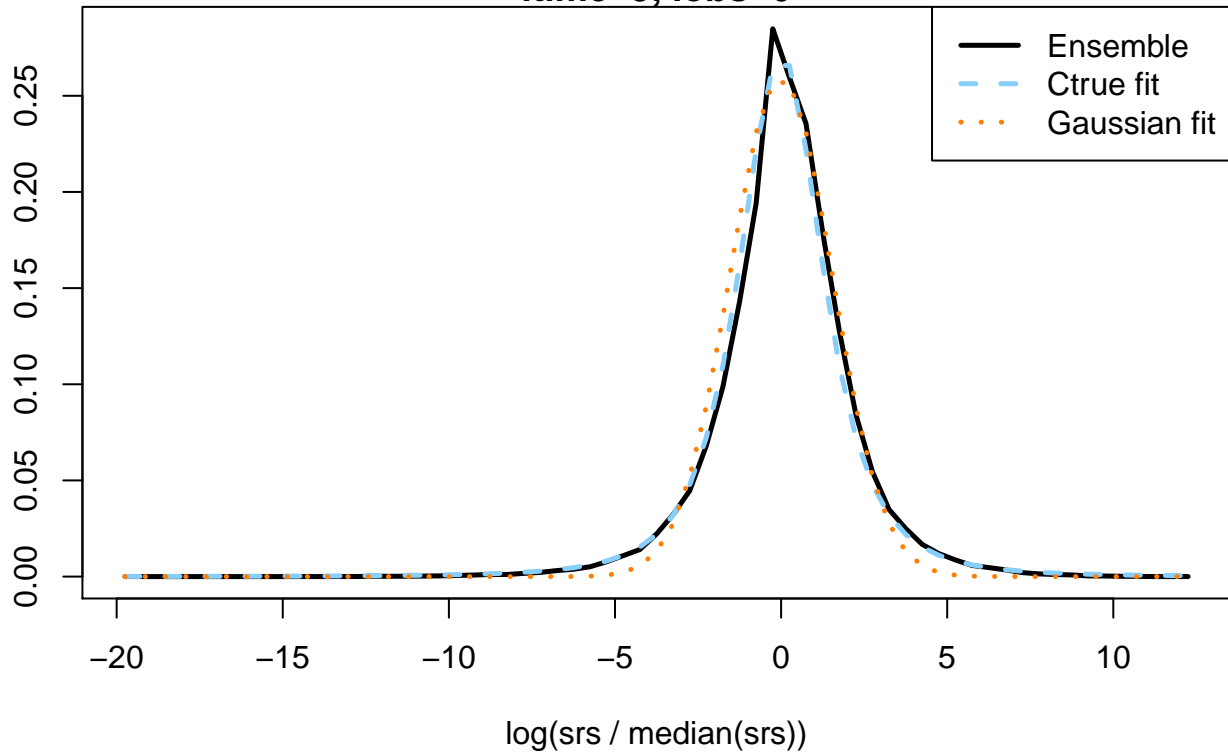

— Ensemble  
- - Ctrue fit  
... Gaussian fit

itime=9, iobs=7

density

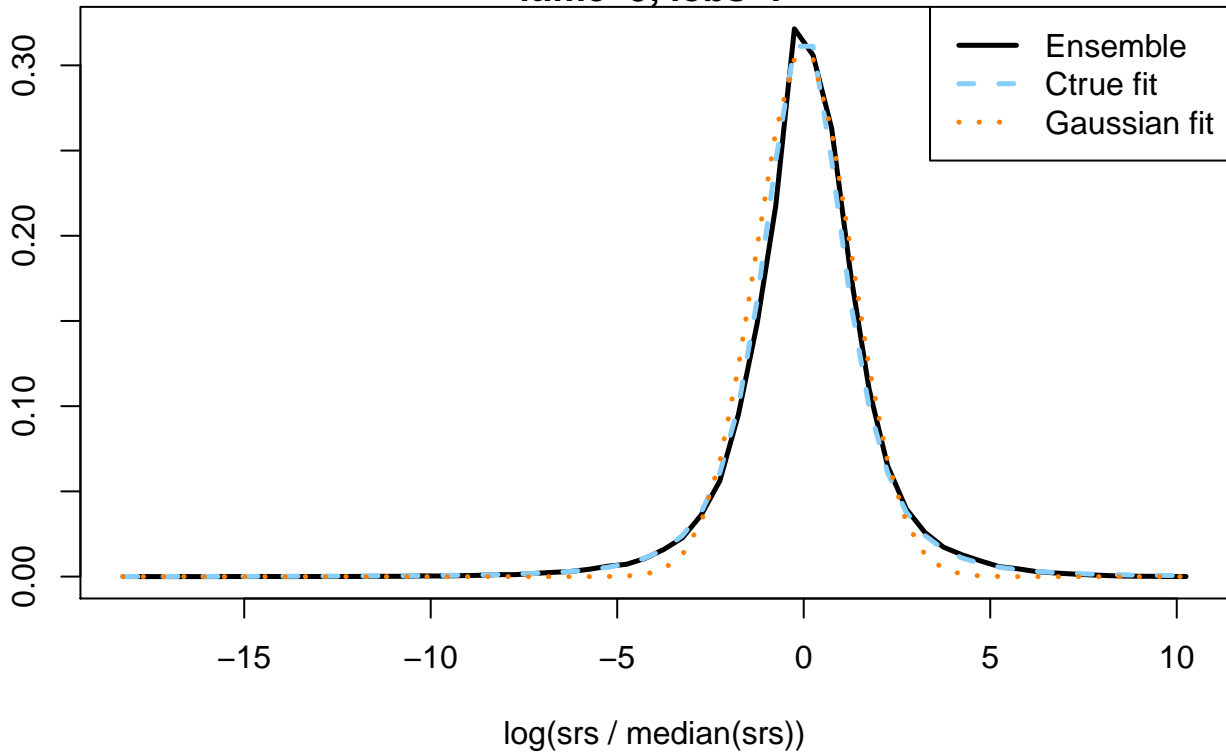

— Ensemble  
- - Ctrue fit  
... Gaussian fit

itime=9, iobs=8

density

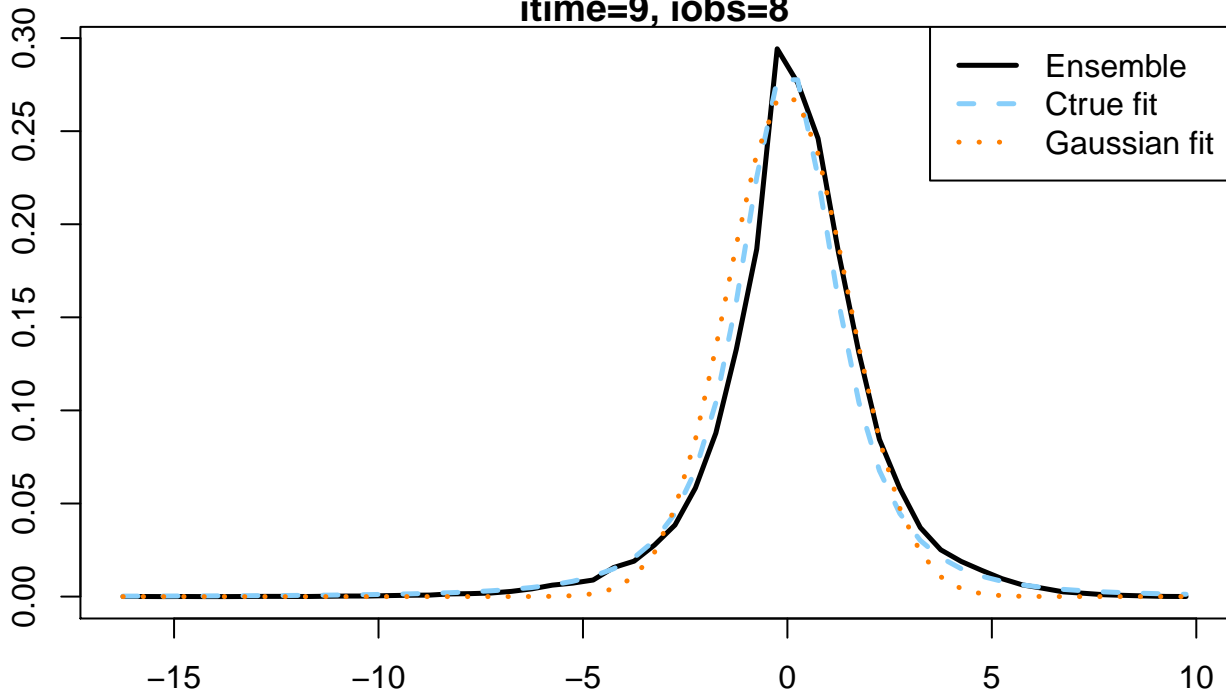

log(srs / median(srs))



itime=9, iobs=9

density

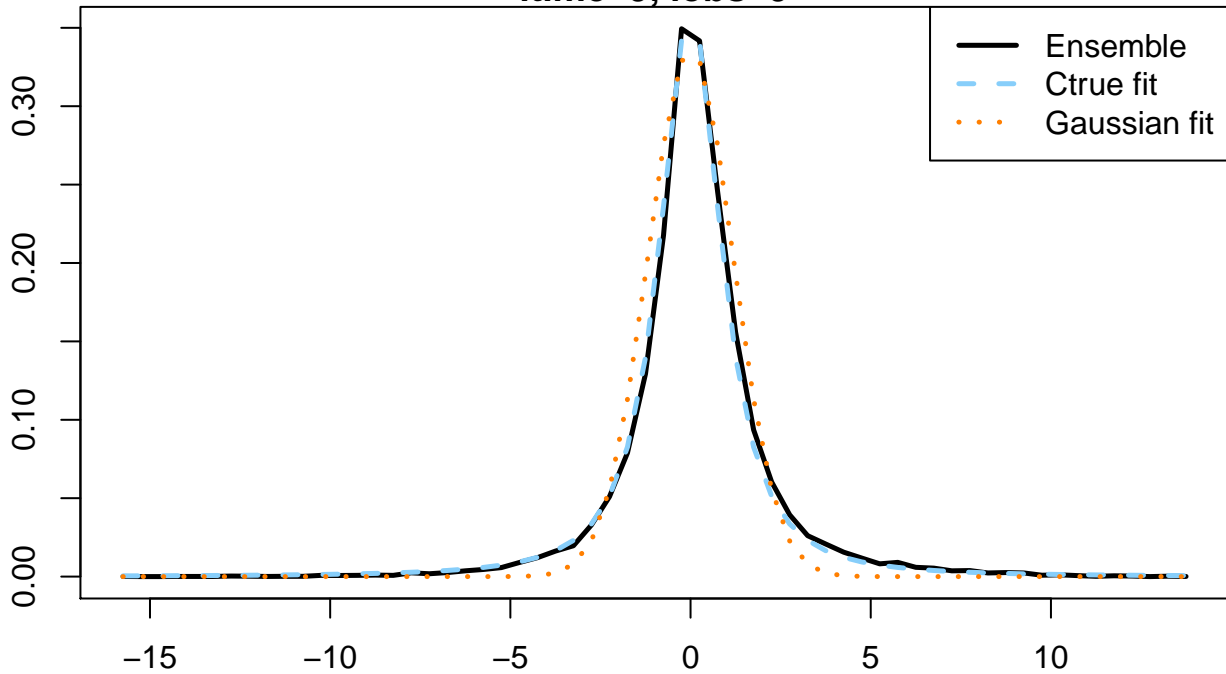

— Ensemble  
- - Ctrue fit  
... Gaussian fit

$\log(\text{srs} / \text{median}(\text{srs}))$
